# Supplementary material for: Elucidation of the core betalain biosynthesis pathway in Amaranthus tricolor
Source: Sci Rep. 2021 Mar 17;11:6086. doi: 10.1038/s41598-021-85486-x (PMC7969944; doi:10.1038/s41598-021-85486-x)
Supplement: Supplementary file 3 — Supplementary Information 3. [file 41598_2021_85486_MOESM3_ESM.xlsx]

## Sheet: 工作表1
Supplementary Table S2. Up-regulated DEGs (differentially expressed genes) identified in AMG with FDR < 0.05 and logFC < -2.
Transcript_id	Length	Count (AMG)	Count (AMR)	TPM (AMG)	TPM (AMR)	FPKM (AMG)	FPKM (AMR)	logFC (AMG-AMR)	Description
TRINITY_DN180_c1_g1_i1	4871	30726	0	187.32	0	129.16	0	-17.8068	tr|A0A0J8B665|A0A0J8B665_BETVU Malic enzyme OS=Beta vulgaris subsp. vulgaris OX=3555 GN=BVRB_9g224840 PE=3 SV=1
TRINITY_DN666_c0_g1_i1	5252	9090	0	51.25	0	35.34	0	-16.0497	tr|A0A0K9QZM6|A0A0K9QZM6_SPIOL Uncharacterized protein OS=Spinacia oleracea OX=3562 GN=SOVF_129830 PE=4 SV=1
TRINITY_DN4899_c0_g1_i1	3626	7791.07	0	64.68	0	44.6	0	-15.8272	tr|A0A0K9QMW4|A0A0K9QMW4_SPIOL Elongation factor Ts, mitochondrial OS=Spinacia oleracea OX=3562 GN=EFTS PE=3 SV=1
TRINITY_DN1978_c0_g1_i1	1812	5926	0	104.01	0	71.72	0	-15.4325	tr|A0A0K9QCI8|A0A0K9QCI8_SPIOL Uncharacterized protein OS=Spinacia oleracea OX=3562 GN=SOVF_194730 PE=4 SV=1
TRINITY_DN1739_c0_g3_i2	2377	4816.25	0	62.75	0	43.27	0	-15.1333	tr|A0A0K9QPG2|A0A0K9QPG2_SPIOL Uncharacterized protein OS=Spinacia oleracea OX=3562 GN=SOVF_156260 PE=4 SV=1
TRINITY_DN7798_c0_g1_i4	837	4748.32	0	207.77	0	143.26	0	-15.1128	-
TRINITY_DN2958_c0_g1_i3	2587	4404.24	0	52.37	0	36.11	0	-15.0043	tr|A0A0K9QKN3|A0A0K9QKN3_SPIOL Nucleolar GTP-binding protein 1 OS=Spinacia oleracea OX=3562 GN=SOVF_174800 PE=3 SV=1
TRINITY_DN1477_c0_g1_i4	5319	4099	0	22.81	0	15.73	0	-14.9007	tr|A0A0K9QZ91|A0A0K9QZ91_SPIOL Uncharacterized protein OS=Spinacia oleracea OX=3562 GN=SOVF_124700 PE=4 SV=1
TRINITY_DN1018_c1_g2_i1	1492	4097	0	89.5	0	61.71	0	-14.9	tr|A0A0K9R5E7|A0A0K9R5E7_SPIOL Uncharacterized protein OS=Spinacia oleracea OX=3562 GN=SOVF_110210 PE=4 SV=1
TRINITY_DN2386_c1_g1_i1	2285	3486.72	0	47.42	0	32.7	0	-14.6675	tr|A0A0K9RP08|A0A0K9RP08_SPIOL Uncharacterized protein OS=Spinacia oleracea OX=3562 GN=SOVF_044950 PE=4 SV=1
TRINITY_DN8262_c0_g2_i6	2045	3059.37	0	46.97	0	32.39	0	-14.4785	tr|A0A0K9RKC2|A0A0K9RKC2_SPIOL Carboxypeptidase OS=Spinacia oleracea OX=3562 GN=SOVF_062750 PE=3 SV=1
TRINITY_DN987_c0_g1_i20	1988	2831.55	0	44.85	0	30.92	0	-14.3673	tr|A0A0K9QF84|A0A0K9QF84_SPIOL Uncharacterized protein OS=Spinacia oleracea OX=3562 GN=SOVF_191370 PE=3 SV=1
TRINITY_DN969_c1_g1_i11	7482	2479.05	0	9.71	0	6.69	0	-14.1752	tr|A0A1B3TNU9|A0A1B3TNU9_MIRJA Integrase OS=Mirabilis jalapa OX=3538 PE=4 SV=1
TRINITY_DN2859_c0_g1_i1	1989	2436	0	38.56	0	26.59	0	-14.15	tr|A0A0K9QRY3|A0A0K9QRY3_SPIOL Uncharacterized protein OS=Spinacia oleracea OX=3562 GN=SOVF_155170 PE=4 SV=1
TRINITY_DN4593_c0_g1_i1	3178	2296	0	21.91	0	15.11	0	-14.0646	tr|A0A0K9S078|A0A0K9S078_SPIOL Uncharacterized protein OS=Spinacia oleracea OX=3562 GN=SOVF_008760 PE=3 SV=1
TRINITY_DN520_c1_g1_i6	2550	2282.1	0	27.56	0	19	0	-14.0558	tr|A0A0K9QN38|A0A0K9QN38_SPIOL Uncharacterized protein OS=Spinacia oleracea OX=3562 GN=SOVF_166550 PE=4 SV=1
TRINITY_DN2984_c0_g1_i2	3787	2250.99	0	17.85	0	12.31	0	-14.0361	tr|A0A0K9RRB4|A0A0K9RRB4_SPIOL Formin-like protein OS=Spinacia oleracea OX=3562 GN=SOVF_037260 PE=3 SV=1
TRINITY_DN7204_c0_g1_i1	5266	2195.34	0	12.34	0	8.51	0	-13.9997	tr|F4NCG3|F4NCG3_BETVU Uncharacterized protein OS=Beta vulgaris subsp. vulgaris OX=3555 PE=4 SV=1
TRINITY_DN1698_c1_g1_i4	8389	2124.17	0	7.4	0	5.1	0	-13.9523	tr|A0A0K9R0C2|A0A0K9R0C2_SPIOL Uncharacterized protein OS=Spinacia oleracea OX=3562 GN=SOVF_120870 PE=4 SV=1
TRINITY_DN10926_c0_g1_i4	1145	2098.74	0	62.4	0	43.03	0	-13.9352	tr|A0A0K9QBE1|A0A0K9QBE1_SPIOL Uncharacterized protein OS=Spinacia oleracea OX=3562 GN=SOVF_203600 PE=4 SV=1
TRINITY_DN20_c0_g2_i3	2981	2097.04	0	21.42	0	14.77	0	-13.9338	tr|A0A0K9QIN8|A0A0K9QIN8_SPIOL Uncharacterized protein OS=Spinacia oleracea OX=3562 GN=SOVF_180820 PE=4 SV=1
TRINITY_DN2430_c0_g1_i4	2610	2012.76	0	23.71	0	16.35	0	-13.8749	tr|A0A0J7YNJ2|A0A0J7YNJ2_BETVU Uncharacterized protein (Fragment) OS=Beta vulgaris subsp. vulgaris OX=3555 GN=BVRB_017600 PE=4 SV=1
TRINITY_DN2621_c0_g1_i9	1174	1970.05	0	56.86	0	39.21	0	-13.8437	tr|A0A0J8BAB5|A0A0J8BAB5_BETVU Uncharacterized protein OS=Beta vulgaris subsp. vulgaris OX=3555 GN=BVRB_7g180600 PE=4 SV=1
TRINITY_DN751_c0_g3_i1	3534	1909.67	0	16.29	0	11.23	0	-13.7991	tr|A0A0K9QNY4|A0A0K9QNY4_SPIOL Uncharacterized protein OS=Spinacia oleracea OX=3562 GN=SOVF_157790 PE=4 SV=1
TRINITY_DN3016_c0_g1_i11	1875	1858.93	0	31.41	0	21.66	0	-13.76	tr|Q8LL67|Q8LL67_AMAHP Polyamine oxidase OS=Amaranthus hypochondriacus OX=28502 PE=2 SV=1
TRINITY_DN12343_c0_g1_i4	5045	1698	0	9.98	0	6.88	0	-13.6294	tr|A0A0K9R831|A0A0K9R831_SPIOL Uncharacterized protein OS=Spinacia oleracea OX=3562 GN=SOVF_096280 PE=3 SV=1
TRINITY_DN1097_c0_g2_i3	1264	1620.1	0	42.86	0	29.55	0	-13.5615	tr|A0A0K9RJ63|A0A0K9RJ63_SPIOL Uncharacterized protein OS=Spinacia oleracea OX=3562 GN=SOVF_064490 PE=4 SV=1
TRINITY_DN22479_c1_g5_i2	1199	1577.33	0	44.4	0	30.62	0	-13.5227	tr|A0A0J8CI46|A0A0J8CI46_BETVU Uncharacterized protein OS=Beta vulgaris subsp. vulgaris OX=3555 GN=BVRB_5g105720 PE=4 SV=1
TRINITY_DN44_c0_g2_i1	1423	1557.8	0	35.93	0	24.77	0	-13.5052	tr|A0A0J8BDI7|A0A0J8BDI7_BETVU Uncharacterized protein OS=Beta vulgaris subsp. vulgaris OX=3555 GN=BVRB_2g045360 PE=4 SV=1
TRINITY_DN901_c1_g2_i3	3492	1550	0	13.39	0	9.23	0	-13.4978	tr|A0A0K9RC45|A0A0K9RC45_SPIOL Uncharacterized protein OS=Spinacia oleracea OX=3562 GN=SOVF_083700 PE=4 SV=1
TRINITY_DN735_c0_g1_i5	1955	1477.55	0	23.84	0	16.44	0	-13.4292	tr|A0A0K9R3L0|A0A0K9R3L0_SPIOL Uncharacterized protein OS=Spinacia oleracea OX=3562 GN=SOVF_110910 PE=4 SV=1
TRINITY_DN969_c1_g1_i12	5316	1473.56	0	8.2	0	5.66	0	-13.4253	tr|A0A0J8B8P2|A0A0J8B8P2_BETVU Uncharacterized protein OS=Beta vulgaris subsp. vulgaris OX=3555 GN=BVRB_5g125260 PE=4 SV=1
TRINITY_DN4068_c0_g1_i1	6300	1416.56	0	6.62	0	4.56	0	-13.3684	tr|A0A0K9QSV4|A0A0K9QSV4_SPIOL Uncharacterized protein OS=Spinacia oleracea OX=3562 GN=SOVF_145400 PE=4 SV=1
TRINITY_DN3526_c2_g1_i2	5670	1383.07	0	7.2	0	4.97	0	-13.3334	tr|A0A0J8B4I5|A0A0J8B4I5_BETVU Uncharacterized protein OS=Beta vulgaris subsp. vulgaris OX=3555 GN=BVRB_003850 PE=4 SV=1
TRINITY_DN5768_c1_g1_i6	4200	1358.34	0	9.66	0	6.66	0	-13.307	-
TRINITY_DN7936_c0_g1_i2	1898	1325	0	22.09	0	15.23	0	-13.2716	tr|A0A0K9RB58|A0A0K9RB58_SPIOL Uncharacterized protein OS=Spinacia oleracea OX=3562 GN=SOVF_086530 PE=4 SV=1
TRINITY_DN3396_c0_g1_i8	5647	1321.25	0	6.91	0	4.77	0	-13.2672	tr|A0A0K9RZA4|A0A0K9RZA4_SPIOL Uncharacterized protein OS=Spinacia oleracea OX=3562 GN=SOVF_011940 PE=4 SV=1
TRINITY_DN3526_c2_g1_i3	5745	1272.62	0	6.54	0	4.51	0	-13.2138	tr|A0A0K9QRD2|A0A0K9QRD2_SPIOL Uncharacterized protein OS=Spinacia oleracea OX=3562 GN=SOVF_150440 PE=4 SV=1
TRINITY_DN1631_c0_g1_i12	6268	1260.18	0	5.92	0	4.08	0	-13.199	tr|F4NCG3|F4NCG3_BETVU Uncharacterized protein OS=Beta vulgaris subsp. vulgaris OX=3555 PE=4 SV=1
TRINITY_DN3711_c0_g1_i4	1170	1251.62	0	36.27	0	25.01	0	-13.1898	tr|A0A0K9RWM9|A0A0K9RWM9_SPIOL Uncharacterized protein OS=Spinacia oleracea OX=3562 GN=SOVF_026600 PE=4 SV=1
TRINITY_DN13699_c0_g1_i1	1938	1216.85	0	19.82	0	13.67	0	-13.1489	-
TRINITY_DN5172_c0_g2_i17	3273	1170.56	0	10.83	0	7.47	0	-13.0933	tr|A0A0J8DZV1|A0A0J8DZV1_BETVU Uncharacterized protein OS=Beta vulgaris subsp. vulgaris OX=3555 GN=BVRB_9g225660 PE=4 SV=1
TRINITY_DN969_c1_g1_i5	7719	1144.16	0	4.34	0	2.99	0	-13.0597	tr|A0A1B3TNU9|A0A1B3TNU9_MIRJA Integrase OS=Mirabilis jalapa OX=3538 PE=4 SV=1
TRINITY_DN1743_c0_g2_i2	1221	1100	0	30.31	0	20.9	0	-13.0031	tr|A0A0K9QNX7|A0A0K9QNX7_SPIOL Uncharacterized protein OS=Spinacia oleracea OX=3562 GN=SOVF_158120 PE=4 SV=1
TRINITY_DN2031_c0_g1_i18	3764	1087.45	0	8.68	0	5.98	0	-12.9859	tr|A0A0K9QSZ1|A0A0K9QSZ1_SPIOL Uncharacterized protein OS=Spinacia oleracea OX=3562 GN=SOVF_144870 PE=4 SV=1
TRINITY_DN3146_c0_g1_i1	1334	1068.9	0	26.56	0	18.31	0	-12.9619	tr|A0A1B1RVA0|A0A1B1RVA0_AMATR Transcription factor MYB1 OS=Amaranthus tricolor OX=29722 PE=2 SV=1
TRINITY_DN3153_c0_g1_i3	4339	1061.74	0	7.3	0	5.03	0	-12.9524	tr|A0A0K9RPR8|A0A0K9RPR8_SPIOL Uncharacterized protein OS=Spinacia oleracea OX=3562 GN=SOVF_042390 PE=4 SV=1
TRINITY_DN1631_c0_g1_i11	6419	1051.98	0	4.82	0	3.32	0	-12.9387	tr|F4NCG3|F4NCG3_BETVU Uncharacterized protein OS=Beta vulgaris subsp. vulgaris OX=3555 PE=4 SV=1
TRINITY_DN6573_c0_g2_i3	1439	1043.46	0	23.76	0	16.38	0	-12.9263	tr|A0A0K9RHP9|A0A0K9RHP9_SPIOL Uncharacterized protein OS=Spinacia oleracea OX=3562 GN=SOVF_070330 PE=3 SV=1
TRINITY_DN491_c0_g1_i3	2057	1030.72	0	15.72	0	10.84	0	-12.9096	tr|A0A0K9QYR6|A0A0K9QYR6_SPIOL Uncharacterized protein OS=Spinacia oleracea OX=3562 GN=SOVF_126340 PE=3 SV=1
TRINITY_DN969_c1_g1_i16	2235	1017.78	0	14.18	0	9.78	0	-12.8913	tr|G5DXN5|G5DXN5_SILLA Shaggy-like protein kinase (Fragment) OS=Silene latifolia OX=37657 PE=2 SV=1
TRINITY_DN16631_c0_g1_i4	3583	974.42	0	8.19	0	5.65	0	-12.8276	tr|A0A0J8B5L6|A0A0J8B5L6_BETVU Uncharacterized protein OS=Beta vulgaris subsp. vulgaris OX=3555 GN=BVRB_9g224450 PE=4 SV=1
TRINITY_DN1239_c0_g2_i1	1139	964.49	0	28.86	0	19.9	0	-12.8127	tr|A0A0K9QHW9|A0A0K9QHW9_SPIOL Uncharacterized protein OS=Spinacia oleracea OX=3562 GN=SOVF_177390 PE=4 SV=1
TRINITY_DN3168_c0_g1_i2	2022	943	0	14.66	0	10.11	0	-12.7809	tr|A0A0K9RHJ2|A0A0K9RHJ2_SPIOL Uncharacterized protein OS=Spinacia oleracea OX=3562 GN=SOVF_072110 PE=4 SV=1
TRINITY_DN9340_c0_g1_i7	3640	939.77	0	7.77	0	5.36	0	-12.7764	tr|A0A0K9RPI5|A0A0K9RPI5_SPIOL Uncharacterized protein OS=Spinacia oleracea OX=3562 GN=SOVF_043640 PE=4 SV=1
TRINITY_DN3838_c0_g1_i6	1842	915.87	0	15.78	0	10.88	0	-12.739	tr|A0A0K9RCI7|A0A0K9RCI7_SPIOL Uncharacterized protein OS=Spinacia oleracea OX=3562 GN=SOVF_088260 PE=4 SV=1
TRINITY_DN2582_c0_g1_i1	1001	912.07	0	31.9	0	21.99	0	-12.7327	tr|A0A0K9RPG0|A0A0K9RPG0_SPIOL Uncharacterized protein OS=Spinacia oleracea OX=3562 GN=SOVF_043530 PE=3 SV=1
TRINITY_DN904_c1_g1_i10	4005	906.71	0	6.78	0	4.68	0	-12.7248	tr|A0A0K9R9T1|A0A0K9R9T1_SPIOL Uncharacterized protein OS=Spinacia oleracea OX=3562 GN=SOVF_090530 PE=3 SV=1
TRINITY_DN3293_c0_g2_i9	2902	897.7	0	9.44	0	6.51	0	-12.7104	tr|A0A0K9R671|A0A0K9R671_SPIOL Uncharacterized protein OS=Spinacia oleracea OX=3562 GN=SOVF_102260 PE=4 SV=1
TRINITY_DN5965_c0_g1_i1	1006	897.84	0	31.21	0	21.52	0	-12.7104	tr|A0A0K9R7D9|A0A0K9R7D9_SPIOL Uncharacterized protein OS=Spinacia oleracea OX=3562 GN=SOVF_102900 PE=4 SV=1
TRINITY_DN4105_c2_g1_i4	1762	849.35	0	15.38	0	10.6	0	-12.6295	-
TRINITY_DN10829_c1_g1_i1	1549	844	0	17.67	0	12.18	0	-12.621	tr|A0A0K9RYX7|A0A0K9RYX7_SPIOL Uncharacterized protein OS=Spinacia oleracea OX=3562 GN=SOVF_013510 PE=4 SV=1
TRINITY_DN720_c0_g1_i5	4047	838.96	0	6.21	0	4.28	0	-12.6124	tr|A0A0J8E3A6|A0A0J8E3A6_BETVU Uncharacterized protein OS=Beta vulgaris subsp. vulgaris OX=3555 GN=BVRB_5g125940 PE=4 SV=1
TRINITY_DN7496_c0_g1_i1	1285	830	0	21.54	0	14.85	0	-12.5968	tr|A0A0K9QNA4|A0A0K9QNA4_SPIOL Uncharacterized protein OS=Spinacia oleracea OX=3562 GN=SOVF_165100 PE=3 SV=1
TRINITY_DN1926_c0_g1_i5	2926	826.52	0	8.61	0	5.94	0	-12.5916	tr|A0A0K9Q7S4|A0A0K9Q7S4_SPIOL Uncharacterized protein (Fragment) OS=Spinacia oleracea OX=3562 GN=SOVF_210470 PE=4 SV=1
TRINITY_DN580_c0_g1_i6	1340	826.79	0.38	20.44	0.01	14.09	0.01	-12.5916	tr|F2YL83|F2YL83_9CARY Actin 1 (Fragment) OS=Gypsophila vaccaria OX=39387 PE=2 SV=1
TRINITY_DN9898_c0_g1_i1	1324	827.19	0	20.73	0	14.3	0	-12.5916	tr|A0A0K9RXV8|A0A0K9RXV8_SPIOL Uncharacterized protein OS=Spinacia oleracea OX=3562 GN=SOVF_016140 PE=4 SV=1
TRINITY_DN3229_c0_g1_i4	2160	821.15	0	11.87	0	8.19	0	-12.5811	tr|A0A0K9QBU8|A0A0K9QBU8_SPIOL Uncharacterized protein OS=Spinacia oleracea OX=3562 GN=SOVF_196830 PE=4 SV=1
TRINITY_DN4597_c0_g1_i6	7943	812.41	0	2.99	0	2.06	0	-12.5652	tr|A0A0K9QI95|A0A0K9QI95_SPIOL Uncharacterized protein OS=Spinacia oleracea OX=3562 GN=SOVF_176140 PE=4 SV=1
TRINITY_DN1399_c0_g1_i5	3413	781.31	0	6.91	0	4.77	0	-12.5091	tr|A0A0K9Q8W9|A0A0K9Q8W9_SPIOL Uncharacterized protein OS=Spinacia oleracea OX=3562 GN=SOVF_206710 PE=4 SV=1
TRINITY_DN13653_c0_g1_i4	1197	778.76	0	21.97	0	15.15	0	-12.5054	-
TRINITY_DN10826_c0_g2_i12	1289	777.42	0	20.1	0	13.86	0	-12.5016	tr|A0A0K9RRF4|A0A0K9RRF4_SPIOL Uncharacterized protein OS=Spinacia oleracea OX=3562 GN=SOVF_037470 PE=4 SV=1
TRINITY_DN13952_c0_g1_i3	2883	760	0	8.05	0	5.55	0	-12.4697	tr|A0A0K9RP95|A0A0K9RP95_SPIOL Uncharacterized protein OS=Spinacia oleracea OX=3562 GN=SOVF_043860 PE=4 SV=1
TRINITY_DN2930_c0_g1_i15	3675	750.39	0.24	6.14	0	4.23	0	-12.4506	tr|A0A0K9R882|A0A0K9R882_SPIOL Uncharacterized protein OS=Spinacia oleracea OX=3562 GN=SOVF_100530 PE=4 SV=1
TRINITY_DN4376_c0_g2_i7	1171	727.09	0	21.05	0	14.51	0	-12.4057	tr|A0A0K9RZI9|A0A0K9RZI9_SPIOL Uncharacterized protein OS=Spinacia oleracea OX=3562 GN=SOVF_011550 PE=4 SV=1
TRINITY_DN406_c1_g1_i3	2331	724.68	0	9.64	0	6.65	0	-12.4017	tr|A0A0K9QXM6|A0A0K9QXM6_SPIOL Uncharacterized protein OS=Spinacia oleracea OX=3562 GN=SOVF_129740 PE=4 SV=1
TRINITY_DN157_c0_g1_i9	6485	708.52	0.2	3.21	0	2.22	0	-12.3695	tr|A0A0K9R9T7|A0A0K9R9T7_SPIOL Uncharacterized protein OS=Spinacia oleracea OX=3562 GN=SOVF_097130 PE=4 SV=1
TRINITY_DN19994_c0_g1_i4	5242	706.47	0	3.99	0	2.75	0	-12.3634	tr|A0A0K9QDS3|A0A0K9QDS3_SPIOL Uncharacterized protein (Fragment) OS=Spinacia oleracea OX=3562 GN=SOVF_190600 PE=4 SV=1
TRINITY_DN1631_c0_g1_i2	4871	699.9	0	4.27	0	2.94	0	-12.3511	tr|F4NCG3|F4NCG3_BETVU Uncharacterized protein OS=Beta vulgaris subsp. vulgaris OX=3555 PE=4 SV=1
TRINITY_DN520_c0_g1_i8	5037	697.19	0	4.11	0	2.83	0	-12.3449	tr|A0A0J8BB81|A0A0J8BB81_BETVU Uncharacterized protein OS=Beta vulgaris subsp. vulgaris OX=3555 GN=BVRB_3g070320 PE=4 SV=1
TRINITY_DN11384_c0_g1_i1	2928	685.16	0	7.13	0	4.92	0	-12.3199	tr|A0A0K9QC56|A0A0K9QC56_SPIOL Uncharacterized protein OS=Spinacia oleracea OX=3562 GN=SOVF_195700 PE=4 SV=1
TRINITY_DN969_c1_g1_i13	1450	680.58	0	15.36	0	10.59	0	-12.3114	tr|A0A0J8BPP6|A0A0J8BPP6_BETVU Uncharacterized protein OS=Beta vulgaris subsp. vulgaris OX=3555 GN=BVRB_9g209060 PE=3 SV=1
TRINITY_DN2824_c0_g1_i6	6484	678.36	0	3.08	0	2.12	0	-12.3051	tr|A0A0J8B7A3|A0A0J8B7A3_BETVU Uncharacterized protein OS=Beta vulgaris subsp. vulgaris OX=3555 GN=BVRB_004490 PE=4 SV=1
TRINITY_DN4361_c0_g1_i6	2350	662.45	0	8.74	0	6.03	0	-12.2706	tr|A0A0K9QTA1|A0A0K9QTA1_SPIOL Uncharacterized protein OS=Spinacia oleracea OX=3562 GN=SOVF_144150 PE=4 SV=1
TRINITY_DN10393_c0_g1_i11	1091	658.66	0	20.75	0	14.31	0	-12.2641	tr|Q711H9|Q711H9_BETVU Soluble pyrophosphatase OS=Beta vulgaris OX=161934 GN=ppa1 PE=2 SV=1
TRINITY_DN4261_c1_g3_i1	798	657.6	0	30.6	0	21.1	0	-12.2619	tr|A0A1B3TNU5|A0A1B3TNU5_MIRJA RNaseH OS=Mirabilis jalapa OX=3538 PE=4 SV=1
TRINITY_DN720_c0_g1_i9	2450	658.02	0	8.3	0	5.72	0	-12.2619	tr|A0A0K9RR63|A0A0K9RR63_SPIOL Uncharacterized protein OS=Spinacia oleracea OX=3562 GN=SOVF_037950 PE=4 SV=1
TRINITY_DN3153_c0_g1_i9	4375	654.41	0	4.46	0	3.08	0	-12.2531	tr|A0A0K9RPR8|A0A0K9RPR8_SPIOL Uncharacterized protein OS=Spinacia oleracea OX=3562 GN=SOVF_042390 PE=4 SV=1
TRINITY_DN520_c0_g1_i3	6054	651.67	0	3.17	0	2.19	0	-12.2487	tr|A0A0J8BB81|A0A0J8BB81_BETVU Uncharacterized protein OS=Beta vulgaris subsp. vulgaris OX=3555 GN=BVRB_3g070320 PE=4 SV=1
TRINITY_DN1586_c1_g1_i3	1460	649.59	0	14.55	0	10.03	0	-12.2442	tr|A0A0K9RZC0|A0A0K9RZC0_SPIOL Uncharacterized protein OS=Spinacia oleracea OX=3562 GN=SOVF_012220 PE=4 SV=1
TRINITY_DN2783_c0_g1_i3	10958	645.81	0	1.71	0	1.18	0	-12.2353	tr|A0A0K9QCQ4|A0A0K9QCQ4_SPIOL Uncharacterized protein OS=Spinacia oleracea OX=3562 GN=SOVF_200870 PE=4 SV=1
TRINITY_DN3386_c0_g2_i2	4110	633.61	0	4.61	0	3.18	0	-12.2083	tr|A0A0J8BLL0|A0A0J8BLL0_BETVU Uncharacterized protein OS=Beta vulgaris subsp. vulgaris OX=3555 GN=BVRB_9g206130 PE=3 SV=1
TRINITY_DN14096_c0_g1_i2	1093	623	0	19.58	0	13.5	0	-12.183	tr|A0A0K9QFI0|A0A0K9QFI0_SPIOL Uncharacterized protein OS=Spinacia oleracea OX=3562 GN=SOVF_184910 PE=4 SV=1
TRINITY_DN992_c0_g1_i12	3050	622.2	0	6.2	0	4.28	0	-12.1807	tr|A0A0K9RFZ9|A0A0K9RFZ9_SPIOL Uncharacterized protein OS=Spinacia oleracea OX=3562 GN=SOVF_077130 PE=3 SV=1
TRINITY_DN1339_c1_g1_i3	1627	616.95	0	12.22	0	8.42	0	-12.1691	tr|A0A0K9R0E4|A0A0K9R0E4_SPIOL Uncharacterized protein OS=Spinacia oleracea OX=3562 GN=SOVF_127650 PE=4 SV=1
TRINITY_DN1675_c0_g1_i3	3773	612.48	0	4.88	0	3.36	0	-12.1573	tr|A0A0K9RU18|A0A0K9RU18_SPIOL Uncharacterized protein OS=Spinacia oleracea OX=3562 GN=SOVF_028510 PE=4 SV=1
TRINITY_DN461_c1_g1_i1	2747	574.08	0	6.4	0	4.41	0	-12.0649	tr|A0A0K9QLI3|A0A0K9QLI3_SPIOL Uncharacterized protein OS=Spinacia oleracea OX=3562 GN=SOVF_165590 PE=4 SV=1
TRINITY_DN904_c1_g1_i3	3993	572.14	0	4.29	0	2.96	0	-12.0598	tr|A0A0K9R9T1|A0A0K9R9T1_SPIOL Uncharacterized protein OS=Spinacia oleracea OX=3562 GN=SOVF_090530 PE=3 SV=1
TRINITY_DN2115_c0_g1_i12	2580	559.55	0	6.67	0	4.6	0	-12.0293	tr|A0A0K9RWX4|A0A0K9RWX4_SPIOL Uncharacterized protein OS=Spinacia oleracea OX=3562 GN=SOVF_019800 PE=4 SV=1
TRINITY_DN854_c2_g1_i7	2714	560.19	0	6.33	0	4.36	0	-12.0293	tr|E7BQD5|E7BQD5_SILLA Gag-pol polyprotein OS=Silene latifolia OX=37657 PE=4 SV=1
TRINITY_DN1485_c2_g1_i1	1936	554.82	0	9.05	0	6.24	0	-12.0163	tr|A0A0K9RLC7|A0A0K9RLC7_SPIOL Uncharacterized protein OS=Spinacia oleracea OX=3562 GN=SOVF_059040 PE=4 SV=1
TRINITY_DN4847_c0_g1_i11	2153	555.02	0	8.05	0	5.55	0	-12.0163	tr|A0A0K9R522|A0A0K9R522_SPIOL Uncharacterized protein OS=Spinacia oleracea OX=3562 GN=SOVF_111120 PE=4 SV=1
TRINITY_DN19994_c0_g1_i5	5170	554.26	0	3.18	0	2.19	0	-12.0137	tr|A0A0K9QDS3|A0A0K9QDS3_SPIOL Uncharacterized protein (Fragment) OS=Spinacia oleracea OX=3562 GN=SOVF_190600 PE=4 SV=1
TRINITY_DN7065_c0_g1_i36	3556	544.24	0.09	4.61	0	3.18	0	-11.9874	tr|A0A0K9QWM4|A0A0K9QWM4_SPIOL Uncharacterized protein OS=Spinacia oleracea OX=3562 GN=SOVF_133110 PE=4 SV=1
TRINITY_DN79_c1_g1_i18	4205	537.47	0	3.82	0	2.63	0	-11.9688	tr|A0A0K9RKR3|A0A0K9RKR3_SPIOL Uncharacterized protein OS=Spinacia oleracea OX=3562 GN=SOVF_055530 PE=4 SV=1
TRINITY_DN992_c0_g1_i18	3074	532.12	0	5.26	0	3.63	0	-11.9553	tr|A0A0K9RFZ9|A0A0K9RFZ9_SPIOL Uncharacterized protein OS=Spinacia oleracea OX=3562 GN=SOVF_077130 PE=3 SV=1
TRINITY_DN2309_c1_g1_i8	1501	528.18	0	11.46	0	7.9	0	-11.9444	tr|A0A0J8B4L6|A0A0J8B4L6_BETVU Uncharacterized protein OS=Beta vulgaris subsp. vulgaris OX=3555 GN=BVRB_003620 PE=3 SV=1
TRINITY_DN3367_c0_g2_i7	4618	521.48	0.06	3.36	0	2.32	0	-11.9251	tr|A0A0K9RM47|A0A0K9RM47_SPIOL Uncharacterized protein OS=Spinacia oleracea OX=3562 GN=SOVF_056950 PE=3 SV=1
TRINITY_DN496_c1_g1_i11	3528	520.64	0	4.45	0	3.07	0	-11.9251	tr|A0A0K9RQS5|A0A0K9RQS5_SPIOL Uncharacterized protein OS=Spinacia oleracea OX=3562 GN=SOVF_045700 PE=4 SV=1
TRINITY_DN11620_c0_g2_i1	1432	519	0	11.88	0	8.19	0	-11.9196	tr|A0A0K9R5U6|A0A0K9R5U6_SPIOL 5-formyltetrahydrofolate cyclo-ligase OS=Spinacia oleracea OX=3562 GN=SOVF_103230 PE=3 SV=1
TRINITY_DN1339_c1_g1_i1	1615	504.05	0	10.06	0	6.94	0	-11.8773	tr|A0A0K9R0E4|A0A0K9R0E4_SPIOL Uncharacterized protein OS=Spinacia oleracea OX=3562 GN=SOVF_127650 PE=4 SV=1
TRINITY_DN3869_c0_g2_i8	1818	500.48	0	8.75	0	6.03	0	-11.8658	tr|A0A0K9RY41|A0A0K9RY41_SPIOL WAT1-related protein OS=Spinacia oleracea OX=3562 GN=SOVF_015590 PE=3 SV=1
TRINITY_DN1158_c1_g2_i6	4095	496.87	0	3.63	0	2.5	0	-11.8571	tr|A0A0K9R1F6|A0A0K9R1F6_SPIOL Uncharacterized protein OS=Spinacia oleracea OX=3562 GN=SOVF_117790 PE=3 SV=1
TRINITY_DN3537_c0_g1_i9	1364	484.9	0	11.74	0	8.1	0	-11.8219	tr|G9FIF2|G9FIF2_BETVU Uncharacterized protein OS=Beta vulgaris OX=161934 PE=4 SV=1
TRINITY_DN4105_c0_g1_i5	4839	479.71	0.02	2.94	0	2.03	0	-11.8069	tr|A0A0K9QFS8|A0A0K9QFS8_SPIOL Uncharacterized protein OS=Spinacia oleracea OX=3562 GN=SOVF_189310 PE=4 SV=1
TRINITY_DN7959_c0_g1_i8	4041	479.37	0	3.55	0	2.45	0	-11.8039	-
TRINITY_DN229_c0_g1_i22	31196	469.07	0	0.43	0	0.3	0	-11.7735	tr|A0A1S5SHG5|A0A1S5SHG5_AMATR Protein Ycf2 OS=Amaranthus tricolor OX=29722 GN=ycf2 PE=3 SV=1
TRINITY_DN1319_c1_g1_i11	4031	462.47	0	3.44	0	2.37	0	-11.7518	tr|A0A0K9QEZ4|A0A0K9QEZ4_SPIOL Uncharacterized protein OS=Spinacia oleracea OX=3562 GN=SOVF_191620 PE=4 SV=1
TRINITY_DN321_c0_g1_i2	13885	460.89	0	0.96	0	0.66	0	-11.7487	tr|A0A0K9QPC1|A0A0K9QPC1_SPIOL Uncharacterized protein OS=Spinacia oleracea OX=3562 GN=SOVF_161720 PE=4 SV=1
TRINITY_DN1105_c1_g1_i16	5239	456.7	0	2.58	0	1.78	0	-11.7361	tr|A0A0K9QP25|A0A0K9QP25_SPIOL Uncharacterized protein OS=Spinacia oleracea OX=3562 GN=SOVF_157710 PE=4 SV=1
TRINITY_DN975_c0_g1_i3	1383	454	0	10.82	0	7.46	0	-11.7266	tr|A0A0K9REJ5|A0A0K9REJ5_SPIOL Uncharacterized protein OS=Spinacia oleracea OX=3562 GN=SOVF_075860 PE=4 SV=1
TRINITY_DN1236_c0_g1_i7	3137	452.61	0	4.38	0	3.02	0	-11.7234	tr|A0A0K9RRH1|A0A0K9RRH1_SPIOL Uncharacterized protein OS=Spinacia oleracea OX=3562 GN=SOVF_037240 PE=4 SV=1
TRINITY_DN530_c0_g1_i7	3408	446.71	0	3.96	0	2.73	0	-11.7042	sp|Q9M4Y3|RR10_MESCR 30S ribosomal protein S10, chloroplastic OS=Mesembryanthemum crystallinum OX=3544 GN=RPS10 PE=2 SV=1
TRINITY_DN183_c0_g1_i4	5259	442.85	0	2.49	0	1.72	0	-11.6912	tr|A0A0K9R8A9|A0A0K9R8A9_SPIOL Uncharacterized protein OS=Spinacia oleracea OX=3562 GN=SOVF_095600 PE=4 SV=1
TRINITY_DN12566_c0_g3_i1	691	435	0	24.52	0	16.9	0	-11.6649	tr|A0A0K9RBT6|A0A0K9RBT6_SPIOL Uncharacterized protein OS=Spinacia oleracea OX=3562 GN=SOVF_090990 PE=4 SV=1
TRINITY_DN1766_c0_g1_i1	3051	434.98	0	4.34	0	2.99	0	-11.6649	tr|A0A0K9Q6T8|A0A0K9Q6T8_SPIOL Uncharacterized protein (Fragment) OS=Spinacia oleracea OX=3562 GN=SOVF_215280 PE=4 SV=1
TRINITY_DN1497_c0_g1_i3	2058	432	0	6.59	0	4.54	0	-11.655	tr|A0A0K9R4X6|A0A0K9R4X6_SPIOL Uncharacterized protein OS=Spinacia oleracea OX=3562 GN=SOVF_106550 PE=4 SV=1
TRINITY_DN19029_c0_g1_i2	2214	420.88	0	5.92	0	4.08	0	-11.6178	tr|A0A0K9R3Y7|A0A0K9R3Y7_SPIOL Uncharacterized protein OS=Spinacia oleracea OX=3562 GN=SOVF_114830 PE=4 SV=1
TRINITY_DN3252_c0_g2_i3	4090	418.98	0	3.07	0	2.11	0	-11.6109	tr|F4NCG1|F4NCG1_BETVU Uncharacterized protein OS=Beta vulgaris subsp. vulgaris OX=3555 PE=4 SV=1
TRINITY_DN756_c0_g1_i19	5210	419.09	0	2.38	0	1.64	0	-11.6109	tr|A0A0J8BAW3|A0A0J8BAW3_BETVU Uncharacterized protein OS=Beta vulgaris subsp. vulgaris OX=3555 GN=BVRB_7g178890 PE=4 SV=1
TRINITY_DN4719_c0_g1_i1	3297	414.53	0	3.8	0	2.62	0	-11.5971	tr|A0A0K9RZ70|A0A0K9RZ70_SPIOL Exocyst subunit Exo70 family protein OS=Spinacia oleracea OX=3562 GN=SOVF_012200 PE=3 SV=1
TRINITY_DN2254_c0_g2_i6	2524	411.7	0	5.03	0	3.47	0	-11.5866	tr|A0A0K9RZL3|A0A0K9RZL3_SPIOL Uncharacterized protein OS=Spinacia oleracea OX=3562 GN=SOVF_016210 PE=4 SV=1
TRINITY_DN2640_c0_g1_i9	1930	404.74	0	6.62	0	4.57	0	-11.5619	-
TRINITY_DN101_c0_g1_i7	3963	402.25	0	3.04	0	2.1	0	-11.5512	tr|A0A0K9R319|A0A0K9R319_SPIOL Uncharacterized protein (Fragment) OS=Spinacia oleracea OX=3562 GN=SOVF_119030 PE=4 SV=1
TRINITY_DN79_c1_g1_i3	7447	402.27	0	1.58	0	1.09	0	-11.5512	tr|A0A0K9RKR3|A0A0K9RKR3_SPIOL Uncharacterized protein OS=Spinacia oleracea OX=3562 GN=SOVF_055530 PE=4 SV=1
TRINITY_DN4011_c0_g1_i1	5109	398.52	0	2.31	0	1.59	0	-11.5404	tr|A0A0K9REM2|A0A0K9REM2_SPIOL Uncharacterized protein OS=Spinacia oleracea OX=3562 GN=SOVF_075350 PE=4 SV=1
TRINITY_DN3030_c0_g3_i2	1700	395	0	7.45	0	5.13	0	-11.5258	tr|A0A0J8B8A1|A0A0J8B8A1_BETVU Uncharacterized protein OS=Beta vulgaris subsp. vulgaris OX=3555 GN=BVRB_000980 PE=4 SV=1
TRINITY_DN1962_c1_g1_i3	1942	393.05	0	6.39	0	4.4	0	-11.5185	tr|A0A0K9RCS5|A0A0K9RCS5_SPIOL Uncharacterized protein OS=Spinacia oleracea OX=3562 GN=SOVF_085970 PE=4 SV=1
TRINITY_DN3205_c0_g2_i6	1527	390.36	0	8.31	0	5.73	0	-11.5075	tr|A0A0K9RUZ2|A0A0K9RUZ2_SPIOL COBRA-like protein OS=Spinacia oleracea OX=3562 GN=SOVF_025610 PE=3 SV=1
TRINITY_DN7674_c0_g1_i8	1971	388.25	0	6.21	0	4.28	0	-11.5	tr|A0A0K9RIL4|A0A0K9RIL4_SPIOL Uncharacterized protein (Fragment) OS=Spinacia oleracea OX=3562 GN=SOVF_067710 PE=3 SV=1
TRINITY_DN4027_c0_g1_i5	3464	381.67	0	3.32	0	2.29	0	-11.4776	tr|A0A0K9R568|A0A0K9R568_SPIOL Uncharacterized protein OS=Spinacia oleracea OX=3562 GN=SOVF_110920 PE=4 SV=1
TRINITY_DN4047_c0_g1_i6	9119	380.14	0	1.22	0	0.84	0	-11.47	tr|A0A0K9QDW0|A0A0K9QDW0_SPIOL Uncharacterized protein OS=Spinacia oleracea OX=3562 GN=SOVF_195620 PE=4 SV=1
TRINITY_DN3386_c0_g1_i7	836	372.12	0	16.31	0	11.24	0	-11.4393	-
TRINITY_DN3487_c2_g1_i2	1978	371.13	0	5.91	0	4.08	0	-11.4354	tr|Q9FQK2|Q9FQK2_AMAHY Reverse transcriptase-like protein (Fragment) OS=Amaranthus hybridus OX=3565 PE=4 SV=1
TRINITY_DN414_c0_g1_i4	1963	370.72	0	5.95	0	4.11	0	-11.4354	tr|A0A0K9RTB1|A0A0K9RTB1_SPIOL Uncharacterized protein OS=Spinacia oleracea OX=3562 GN=SOVF_032050 PE=4 SV=1
TRINITY_DN285_c0_g2_i12	6358	369.6	0	1.71	0	1.18	0	-11.4315	tr|A0A0K9QB02|A0A0K9QB02_SPIOL Uncharacterized protein OS=Spinacia oleracea OX=3562 GN=SOVF_199510 PE=4 SV=1
TRINITY_DN414_c0_g1_i13	4370	369.09	0	2.52	0	1.74	0	-11.4276	tr|A0A0K9RTB1|A0A0K9RTB1_SPIOL Uncharacterized protein OS=Spinacia oleracea OX=3562 GN=SOVF_032050 PE=4 SV=1
TRINITY_DN5585_c0_g1_i5	4043	367.92	0	2.72	0	1.88	0	-11.4237	tr|A0A0K9QDM4|A0A0K9QDM4_SPIOL Uncharacterized protein OS=Spinacia oleracea OX=3562 GN=SOVF_198040 PE=3 SV=1
TRINITY_DN3869_c0_g2_i4	3857	367.41	0	2.86	0	1.97	0	-11.4198	tr|A0A0K9RY41|A0A0K9RY41_SPIOL WAT1-related protein OS=Spinacia oleracea OX=3562 GN=SOVF_015590 PE=3 SV=1
TRINITY_DN9740_c0_g2_i1	3373	367.42	0	3.29	0	2.27	0	-11.4198	sp|P82278|RR9_SPIOL 30S ribosomal protein S9, chloroplastic OS=Spinacia oleracea OX=3562 GN=PRPS9 PE=1 SV=2
TRINITY_DN1732_c0_g1_i1	1675	364.3	0	6.98	0	4.81	0	-11.408	tr|E7BQD4|E7BQD4_SILLA Gag-pol polyprotein OS=Silene latifolia OX=37657 PE=4 SV=1
TRINITY_DN1157_c1_g1_i1	1519	362.07	0	7.75	0	5.34	0	-11.4	tr|A0A0K9RI90|A0A0K9RI90_SPIOL Uncharacterized protein OS=Spinacia oleracea OX=3562 GN=SOVF_069020 PE=4 SV=1
TRINITY_DN1221_c0_g1_i5	3755	356.57	0	2.85	0	1.97	0	-11.3799	tr|A0A0K9QKJ9|A0A0K9QKJ9_SPIOL Uncharacterized protein OS=Spinacia oleracea OX=3562 GN=SOVF_168680 PE=4 SV=1
TRINITY_DN817_c0_g1_i12	1825	352.91	0	6.14	0	4.24	0	-11.3637	tr|A0A0K9S3L9|A0A0K9S3L9_SPIOL Uncharacterized protein OS=Spinacia oleracea OX=3562 GN=SOVF_002810 PE=4 SV=1
TRINITY_DN2159_c0_g1_i12	4228	350.83	0	2.48	0	1.71	0	-11.3555	tr|A0A0J8BEW5|A0A0J8BEW5_BETVU Uncharacterized protein OS=Beta vulgaris subsp. vulgaris OX=3555 GN=BVRB_1g023260 PE=4 SV=1
TRINITY_DN2201_c0_g1_i29	2757	351.2	0	3.9	0	2.69	0	-11.3555	tr|A0A0K9RN08|A0A0K9RN08_SPIOL Uncharacterized protein OS=Spinacia oleracea OX=3562 GN=SOVF_048480 PE=4 SV=1
TRINITY_DN7312_c0_g1_i4	282	351.32	0	96.91	0	66.82	0	-11.3555	tr|A0A0Y0S6U6|A0A0Y0S6U6_MESCR Elongation factor 1-alpha OS=Mesembryanthemum crystallinum OX=3544 PE=2 SV=1
TRINITY_DN101_c0_g1_i2	3885	345.81	0	2.67	0	1.84	0	-11.3348	tr|A0A0K9R319|A0A0K9R319_SPIOL Uncharacterized protein (Fragment) OS=Spinacia oleracea OX=3562 GN=SOVF_119030 PE=4 SV=1
TRINITY_DN519_c1_g1_i6	3254	340.32	0	3.17	0	2.18	0	-11.3096	tr|A0A0K9RDY2|A0A0K9RDY2_SPIOL Uncharacterized protein OS=Spinacia oleracea OX=3562 GN=SOVF_083460 PE=4 SV=1
TRINITY_DN4009_c0_g1_i3	2066	338.6	0	5.14	0	3.54	0	-11.3053	tr|A0A0K9QHJ2|A0A0K9QHJ2_SPIOL Uncharacterized protein OS=Spinacia oleracea OX=3562 GN=SOVF_184490 PE=4 SV=1
TRINITY_DN6206_c0_g1_i5	1824	338.51	0	5.9	0	4.07	0	-11.3053	tr|A0A0K9S0M3|A0A0K9S0M3_SPIOL Uncharacterized protein OS=Spinacia oleracea OX=3562 GN=SOVF_013460 PE=4 SV=1
TRINITY_DN349_c1_g1_i5	6938	337.55	0	1.43	0	0.98	0	-11.3011	tr|A0A0K9R748|A0A0K9R748_SPIOL Uncharacterized protein OS=Spinacia oleracea OX=3562 GN=SOVF_106010 PE=4 SV=1
TRINITY_DN2358_c0_g1_i14	1576	336.72	0	6.91	0	4.77	0	-11.2968	tr|A0A0K9RYT6|A0A0K9RYT6_SPIOL Uncharacterized protein OS=Spinacia oleracea OX=3562 GN=SOVF_013520 PE=4 SV=1
TRINITY_DN10483_c0_g2_i1	2957	333.62	0	3.44	0	2.37	0	-11.2839	tr|A0A0K9RQD1|A0A0K9RQD1_SPIOL Uncharacterized protein OS=Spinacia oleracea OX=3562 GN=SOVF_041040 PE=4 SV=1
TRINITY_DN3424_c0_g1_i7	3313	334.09	0	3.05	0	2.1	0	-11.2839	tr|A0A0K9QIR2|A0A0K9QIR2_SPIOL Uncharacterized protein OS=Spinacia oleracea OX=3562 GN=SOVF_174710 PE=4 SV=1
TRINITY_DN811_c0_g1_i1	6080	333.56	0	1.62	0	1.11	0	-11.2839	tr|A0A0K9QVB8|A0A0K9QVB8_SPIOL Uncharacterized protein OS=Spinacia oleracea OX=3562 GN=SOVF_137390 PE=4 SV=1
TRINITY_DN3016_c0_g1_i2	2041	330.53	0	5.09	0	3.51	0	-11.2709	tr|Q8LL67|Q8LL67_AMAHP Polyamine oxidase OS=Amaranthus hypochondriacus OX=28502 PE=2 SV=1
TRINITY_DN349_c1_g1_i1	7209	330.04	0	1.34	0	0.93	0	-11.2665	tr|A0A0K9R748|A0A0K9R748_SPIOL Uncharacterized protein OS=Spinacia oleracea OX=3562 GN=SOVF_106010 PE=4 SV=1
TRINITY_DN5172_c0_g2_i11	3429	326.95	0	2.88	0	1.99	0	-11.2534	tr|A0A0J8DZV1|A0A0J8DZV1_BETVU Uncharacterized protein OS=Beta vulgaris subsp. vulgaris OX=3555 GN=BVRB_9g225660 PE=4 SV=1
TRINITY_DN1239_c0_g2_i5	1156	325.61	0	9.57	0	6.6	0	-11.2489	tr|A0A0K9QHW9|A0A0K9QHW9_SPIOL Uncharacterized protein OS=Spinacia oleracea OX=3562 GN=SOVF_177390 PE=4 SV=1
TRINITY_DN2950_c0_g2_i10	3918	325.51	0.25	2.49	0	1.72	0	-11.2489	tr|A0A0K9QK45|A0A0K9QK45_SPIOL Uncharacterized protein OS=Spinacia oleracea OX=3562 GN=SOVF_170350 PE=4 SV=1
TRINITY_DN161_c0_g1_i21	5343	322.04	0.01	1.78	0	1.23	0	-11.2311	tr|A0A0K9RCT4|A0A0K9RCT4_SPIOL Uncharacterized protein OS=Spinacia oleracea OX=3562 GN=SOVF_081340 PE=4 SV=1
TRINITY_DN806_c0_g1_i1	3014	320.47	0	3.24	0	2.23	0	-11.2222	tr|A0A0C5AZ91|A0A0C5AZ91_9CARY Acyl carrier protein OS=Suaeda glauca OX=397272 PE=2 SV=1
TRINITY_DN285_c0_g2_i1	6552	317.61	0	1.43	0	0.98	0	-11.2131	tr|A0A0K9QB02|A0A0K9QB02_SPIOL Uncharacterized protein OS=Spinacia oleracea OX=3562 GN=SOVF_199510 PE=4 SV=1
TRINITY_DN6423_c0_g1_i12	1674	318.07	0	6.1	0	4.21	0	-11.2131	tr|A0A0J8B7P7|A0A0J8B7P7_BETVU Methionine aminopeptidase OS=Beta vulgaris subsp. vulgaris OX=3555 GN=BVRB_003470 PE=3 SV=1
TRINITY_DN195_c2_g2_i2	1000	315.52	0	11.05	0	7.62	0	-11.204	-
TRINITY_DN4746_c0_g1_i2	2649	315.61	0	3.66	0	2.52	0	-11.204	tr|A0A0K9RT47|A0A0K9RT47_SPIOL Sodium/hydrogen exchanger OS=Spinacia oleracea OX=3562 GN=SOVF_031830 PE=3 SV=1
TRINITY_DN6961_c0_g2_i7	1889	313.78	0	5.26	0	3.63	0	-11.1949	tr|A0A0K9QR37|A0A0K9QR37_SPIOL Uncharacterized protein OS=Spinacia oleracea OX=3562 GN=SOVF_151380 PE=4 SV=1
TRINITY_DN5965_c0_g1_i5	2566	309.59	0	3.71	0	2.56	0	-11.1764	tr|A0A0K9R7D9|A0A0K9R7D9_SPIOL Uncharacterized protein OS=Spinacia oleracea OX=3562 GN=SOVF_102900 PE=4 SV=1
TRINITY_DN2734_c0_g1_i3	2115	306	0	4.53	0	3.12	0	-11.1576	tr|A0A1B3TNV1|A0A1B3TNV1_MIRJA Reverse transcriptase OS=Mirabilis jalapa OX=3538 PE=4 SV=1
TRINITY_DN100_c0_g1_i14	1987	302.59	0.27	4.8	0	3.31	0	-11.1434	tr|A0A0K9S1D9|A0A0K9S1D9_SPIOL Uncharacterized protein OS=Spinacia oleracea OX=3562 GN=SOVF_003600 PE=4 SV=1
TRINITY_DN1010_c0_g1_i5	5484	301.77	0	1.63	0	1.12	0	-11.1387	tr|A0A0K9RSQ8|A0A0K9RSQ8_SPIOL Uncharacterized protein OS=Spinacia oleracea OX=3562 GN=SOVF_039610 PE=4 SV=1
TRINITY_DN904_c1_g1_i9	4138	297.06	0	2.15	0	1.48	0	-11.1146	tr|A0A0K9R9T1|A0A0K9R9T1_SPIOL Uncharacterized protein OS=Spinacia oleracea OX=3562 GN=SOVF_090530 PE=3 SV=1
TRINITY_DN641_c0_g1_i11	3365	294.95	0.05	2.65	0	1.83	0	-11.1049	tr|A0A0K9R3K7|A0A0K9R3K7_SPIOL Uncharacterized protein OS=Spinacia oleracea OX=3562 GN=SOVF_110860 PE=4 SV=1
TRINITY_DN11766_c0_g1_i3	3607	292.84	0	2.44	0	1.69	0	-11.095	tr|A7UGI6|A7UGI6_SPIOL Glutamine synthetase OS=Spinacia oleracea OX=3562 GN=GS1 PE=2 SV=1
TRINITY_DN4452_c0_g2_i7	2277	293.24	0	4	0	2.76	0	-11.095	tr|L7ZC15|L7ZC15_SPIOL Non-symbiotic hemoglobin OS=Spinacia oleracea OX=3562 PE=2 SV=1
TRINITY_DN3386_c0_g1_i3	902	291.07	0	11.58	0	7.99	0	-11.0852	-
TRINITY_DN2389_c0_g1_i4	1202	290.45	0	8.15	0	5.62	0	-11.0802	tr|A0A0K9QB65|A0A0K9QB65_SPIOL Uncharacterized protein OS=Spinacia oleracea OX=3562 GN=SOVF_204420 PE=4 SV=1
TRINITY_DN5085_c0_g1_i5	8435	288.89	0	1	0	0.69	0	-11.0752	tr|A0A0K9QB51|A0A0K9QB51_SPIOL Uncharacterized protein (Fragment) OS=Spinacia oleracea OX=3562 GN=SOVF_199060 PE=4 SV=1
TRINITY_DN6797_c0_g1_i3	912	288.99	0	11.34	0	7.82	0	-11.0752	-
TRINITY_DN3424_c0_g1_i5	2018	287.8	0	4.48	0	3.09	0	-11.0702	tr|A0A0K9QIR2|A0A0K9QIR2_SPIOL Uncharacterized protein OS=Spinacia oleracea OX=3562 GN=SOVF_174710 PE=4 SV=1
TRINITY_DN2114_c0_g1_i2	2806	287.23	0	3.13	0	2.16	0	-11.0652	tr|A0A0K9RYP0|A0A0K9RYP0_SPIOL Uncharacterized protein OS=Spinacia oleracea OX=3562 GN=SOVF_014190 PE=4 SV=1
TRINITY_DN4719_c0_g1_i3	3131	283.68	0	2.75	0	1.9	0	-11.0501	tr|A0A0K9RZ70|A0A0K9RZ70_SPIOL Exocyst subunit Exo70 family protein OS=Spinacia oleracea OX=3562 GN=SOVF_012200 PE=3 SV=1
TRINITY_DN5411_c0_g1_i15	2901	282.77	0	2.97	0	2.05	0	-11.045	tr|A0A0K9RDX4|A0A0K9RDX4_SPIOL Uncharacterized protein OS=Spinacia oleracea OX=3562 GN=SOVF_077680 PE=4 SV=1
TRINITY_DN11988_c0_g1_i1	3497	282.07	0	2.43	0	1.68	0	-11.0399	tr|A0A0K9QTV4|A0A0K9QTV4_SPIOL Uncharacterized protein OS=Spinacia oleracea OX=3562 GN=SOVF_142040 PE=4 SV=1
TRINITY_DN4160_c0_g1_i3	4837	280.64	0	1.72	0	1.19	0	-11.0347	tr|A0A0K9RPR3|A0A0K9RPR3_SPIOL Uncharacterized protein OS=Spinacia oleracea OX=3562 GN=SOVF_042980 PE=4 SV=1
TRINITY_DN3952_c1_g1_i2	2732	280.45	0	3.15	0	2.17	0	-11.0296	tr|A0A0K9QRV2|A0A0K9QRV2_SPIOL Uncharacterized protein OS=Spinacia oleracea OX=3562 GN=SOVF_153710 PE=3 SV=1
TRINITY_DN1330_c0_g1_i11	1305	276.51	0	7.05	0	4.86	0	-11.0141	tr|A0A0K9QPF7|A0A0K9QPF7_SPIOL Uncharacterized protein OS=Spinacia oleracea OX=3562 GN=SOVF_162300 PE=4 SV=1
TRINITY_DN5943_c0_g3_i1	4180	276.54	0.06	1.98	0	1.36	0	-11.0141	tr|A0A0K9QPW3|A0A0K9QPW3_SPIOL Peptidylprolyl isomerase OS=Spinacia oleracea OX=3562 GN=SOVF_154880 PE=4 SV=1
TRINITY_DN11692_c0_g1_i1	1703	275.51	0	5.18	0	3.57	0	-11.0089	tr|A0A0J8BUM7|A0A0J8BUM7_BETVU Fatty acyl-CoA reductase OS=Beta vulgaris subsp. vulgaris OX=3555 GN=BVRB_8g190320 PE=3 SV=1
TRINITY_DN8195_c1_g3_i2	1877	275.94	0	4.66	0	3.21	0	-11.0089	tr|A0A0K9Q778|A0A0K9Q778_SPIOL Uncharacterized protein OS=Spinacia oleracea OX=3562 GN=SOVF_213010 PE=4 SV=1
TRINITY_DN1407_c0_g1_i51	4378	274.96	0	1.87	0	1.29	0	-11.0036	tr|A0A0K9R530|A0A0K9R530_SPIOL Uncharacterized protein OS=Spinacia oleracea OX=3562 GN=SOVF_106040 PE=4 SV=1
TRINITY_DN5043_c0_g1_i12	5447	270.21	0	1.47	0	1.01	0	-10.9772	tr|A0A0K9S1V1|A0A0K9S1V1_SPIOL Uncharacterized protein OS=Spinacia oleracea OX=3562 GN=SOVF_004330 PE=4 SV=1
TRINITY_DN10926_c0_g1_i3	1224	266.08	0	7.31	0	5.04	0	-10.9556	tr|A0A0K9QBE1|A0A0K9QBE1_SPIOL Uncharacterized protein OS=Spinacia oleracea OX=3562 GN=SOVF_203600 PE=4 SV=1
TRINITY_DN1451_c0_g1_i3	3667	260.67	0	2.14	0	1.47	0	-10.9283	tr|A0A0K9RNI2|A0A0K9RNI2_SPIOL Non-specific serine/threonine protein kinase OS=Spinacia oleracea OX=3562 GN=SOVF_046930 PE=3 SV=1
TRINITY_DN1228_c0_g1_i3	2493	259.99	0	3.22	0	2.22	0	-10.9227	tr|A0A0K9RIB1|A0A0K9RIB1_SPIOL Reticulon-like protein OS=Spinacia oleracea OX=3562 GN=SOVF_063540 PE=4 SV=1
TRINITY_DN4188_c0_g1_i4	1859	258.35	0	4.41	0	3.04	0	-10.9116	-
TRINITY_DN1976_c0_g1_i3	1891	257.29	0.02	4.31	0	2.97	0	-10.906	tr|A0A0K9QXF8|A0A0K9QXF8_SPIOL Uncharacterized protein OS=Spinacia oleracea OX=3562 GN=SOVF_137500 PE=4 SV=1
TRINITY_DN2280_c0_g1_i2	8354	256.31	0	0.9	0	0.62	0	-10.9004	tr|E7BQD5|E7BQD5_SILLA Gag-pol polyprotein OS=Silene latifolia OX=37657 PE=4 SV=1
TRINITY_DN5415_c0_g5_i1	1591	256.16	0	5.2	0	3.59	0	-10.9004	tr|A0A0K9RR79|A0A0K9RR79_SPIOL Uncharacterized protein OS=Spinacia oleracea OX=3562 GN=SOVF_037690 PE=4 SV=1
TRINITY_DN1022_c0_g2_i7	3112	254.2	0	2.48	0	1.71	0	-10.8891	tr|A0A0K9QQB6|A0A0K9QQB6_SPIOL Uncharacterized protein OS=Spinacia oleracea OX=3562 GN=SOVF_153540 PE=4 SV=1
TRINITY_DN2642_c0_g1_i1	1586	253.53	0.09	5.17	0	3.56	0	-10.8891	tr|A0A0K9RWM6|A0A0K9RWM6_SPIOL Uncharacterized protein OS=Spinacia oleracea OX=3562 GN=SOVF_019600 PE=4 SV=1
TRINITY_DN722_c0_g1_i5	1111	254.35	0	7.84	0	5.41	0	-10.8891	-
TRINITY_DN978_c0_g1_i1	2554	254.42	0	3.07	0	2.12	0	-10.8891	tr|A0A0K9RPU0|A0A0K9RPU0_SPIOL Uncharacterized protein OS=Spinacia oleracea OX=3562 GN=SOVF_042210 PE=4 SV=1
TRINITY_DN401_c2_g1_i3	614	252.55	0	16.78	0	11.57	0	-10.8834	-
TRINITY_DN2878_c0_g2_i1	2089	252.42	0	3.79	0	2.61	0	-10.8777	tr|A0A0K9QHZ9|A0A0K9QHZ9_SPIOL Uncharacterized protein OS=Spinacia oleracea OX=3562 GN=SOVF_183350 PE=4 SV=1
TRINITY_DN987_c0_g1_i25	3764	250	0	2	0	1.38	0	-10.8662	tr|A0A0K9QF84|A0A0K9QF84_SPIOL Uncharacterized protein OS=Spinacia oleracea OX=3562 GN=SOVF_191370 PE=3 SV=1
TRINITY_DN2349_c0_g2_i5	7030	248.46	0	1.04	0	0.72	0	-10.8546	tr|A0A0K9RQT7|A0A0K9RQT7_SPIOL Uncharacterized protein OS=Spinacia oleracea OX=3562 GN=SOVF_039520 PE=4 SV=1
TRINITY_DN1313_c0_g1_i37	4354	247.44	0	1.7	0	1.17	0	-10.8488	tr|A0A0K9QJH8|A0A0K9QJH8_SPIOL Uncharacterized protein OS=Spinacia oleracea OX=3562 GN=SOVF_172140 PE=4 SV=1
TRINITY_DN3491_c0_g1_i5	5521	244.83	0	1.31	0	0.9	0	-10.8371	tr|A0A0K9QUL3|A0A0K9QUL3_SPIOL Uncharacterized protein OS=Spinacia oleracea OX=3562 GN=SOVF_139590 PE=4 SV=1
TRINITY_DN4362_c0_g1_i7	504	245.36	0	21.9	0	15.1	0	-10.8371	tr|A0A0J8B1W2|A0A0J8B1W2_BETVU Uncharacterized protein OS=Beta vulgaris subsp. vulgaris OX=3555 GN=BVRB_013260 PE=4 SV=1
TRINITY_DN9271_c0_g1_i7	2576	243.73	0	2.91	0	2.01	0	-10.8312	tr|A0A0K9R964|A0A0K9R964_SPIOL Uncharacterized protein OS=Spinacia oleracea OX=3562 GN=SOVF_099180 PE=4 SV=1
TRINITY_DN3801_c0_g1_i3	3161	242.74	0	2.33	0	1.61	0	-10.8252	tr|A0A0K9R8Q7|A0A0K9R8Q7_SPIOL Uncharacterized protein OS=Spinacia oleracea OX=3562 GN=SOVF_094130 PE=4 SV=1
TRINITY_DN790_c0_g1_i6	4151	242.55	0	1.75	0	1.2	0	-10.8252	tr|A0A0J8B4Y3|A0A0J8B4Y3_BETVU Uncharacterized protein OS=Beta vulgaris subsp. vulgaris OX=3555 GN=BVRB_002990 PE=4 SV=1
TRINITY_DN229_c0_g1_i24	31241	241.65	0	0.22	0	0.15	0	-10.8193	tr|A0A1S5SHG5|A0A1S5SHG5_AMATR Protein Ycf2 OS=Amaranthus tricolor OX=29722 GN=ycf2 PE=3 SV=1
TRINITY_DN1466_c0_g2_i11	2786	240.62	0	2.64	0	1.82	0	-10.8133	tr|A0A0K9RK67|A0A0K9RK67_SPIOL ATP synthase subunit gamma OS=Spinacia oleracea OX=3562 GN=SOVF_062960 PE=3 SV=1
TRINITY_DN4521_c0_g1_i5	10985	240.95	0	0.64	0	0.44	0	-10.8133	tr|A0A0K9RKK8|A0A0K9RKK8_SPIOL Uncharacterized protein OS=Spinacia oleracea OX=3562 GN=SOVF_061310 PE=4 SV=1
TRINITY_DN1358_c0_g2_i13	2665	239.69	0	2.76	0	1.9	0	-10.8073	tr|A0A0K9QVT8|A0A0K9QVT8_SPIOL Uncharacterized protein OS=Spinacia oleracea OX=3562 GN=SOVF_142930 PE=4 SV=1
TRINITY_DN4359_c0_g1_i4	1578	239.53	0	4.91	0	3.39	0	-10.8073	tr|A0A0K9QVC1|A0A0K9QVC1_SPIOL Uncharacterized protein OS=Spinacia oleracea OX=3562 GN=SOVF_137110 PE=4 SV=1
TRINITY_DN1485_c2_g1_i7	2043	239.13	0	3.68	0	2.53	0	-10.8013	tr|A0A0K9RLC7|A0A0K9RLC7_SPIOL Uncharacterized protein OS=Spinacia oleracea OX=3562 GN=SOVF_059040 PE=4 SV=1
TRINITY_DN3645_c0_g1_i4	1620	238.69	0	4.75	0	3.27	0	-10.8013	sp|O49937|RK4_SPIOL 50S ribosomal protein L4, chloroplastic OS=Spinacia oleracea OX=3562 GN=RPL4 PE=1 SV=1
TRINITY_DN1495_c0_g2_i1	1311	234.75	0	5.95	0	4.1	0	-10.777	tr|A0A0J8B4E8|A0A0J8B4E8_BETVU Uncharacterized protein OS=Beta vulgaris subsp. vulgaris OX=3555 GN=BVRB_002490 PE=3 SV=1
TRINITY_DN2010_c0_g2_i1	1866	235.42	0	4	0	2.76	0	-10.777	tr|A0A0K9R5T3|A0A0K9R5T3_SPIOL Uncharacterized protein OS=Spinacia oleracea OX=3562 GN=SOVF_103330 PE=4 SV=1
TRINITY_DN2010_c0_g2_i9	2593	235.07	0	2.79	0	1.92	0	-10.777	tr|A0A0K9R5T3|A0A0K9R5T3_SPIOL Uncharacterized protein OS=Spinacia oleracea OX=3562 GN=SOVF_103330 PE=4 SV=1
TRINITY_DN84_c0_g1_i14	6673	234.95	0	1.03	0	0.71	0	-10.777	tr|A0A0K9R392|A0A0K9R392_SPIOL Uncharacterized protein OS=Spinacia oleracea OX=3562 GN=SOVF_117920 PE=3 SV=1
TRINITY_DN9745_c0_g1_i3	3789	235.33	0	1.87	0	1.29	0	-10.777	tr|A0A0K9RD16|A0A0K9RD16_SPIOL Uncharacterized protein OS=Spinacia oleracea OX=3562 GN=SOVF_086550 PE=4 SV=1
TRINITY_DN6864_c0_g1_i2	967	234.14	0	8.54	0	5.89	0	-10.7708	tr|A0A0K9S1N6|A0A0K9S1N6_SPIOL Uncharacterized protein OS=Spinacia oleracea OX=3562 GN=SOVF_005040 PE=4 SV=1
TRINITY_DN8826_c1_g1_i16	2907	233.5	0	2.45	0	1.69	0	-10.7708	tr|A0A0K9QR78|A0A0K9QR78_SPIOL Uncharacterized protein OS=Spinacia oleracea OX=3562 GN=SOVF_150370 PE=3 SV=1
TRINITY_DN13809_c0_g1_i4	697	233.07	0	12.98	0	8.95	0	-10.7646	-
TRINITY_DN15460_c0_g1_i5	3115	232.54	0	2.27	0	1.56	0	-10.7646	tr|A0A0J8BDV9|A0A0J8BDV9_BETVU Uncharacterized protein OS=Beta vulgaris subsp. vulgaris OX=3555 GN=BVRB_1g023180 PE=4 SV=1
TRINITY_DN393_c1_g1_i1	2732	233.13	0	2.61	0	1.8	0	-10.7646	tr|A0A0J8B9N2|A0A0J8B9N2_BETVU Uncharacterized protein OS=Beta vulgaris subsp. vulgaris OX=3555 GN=BVRB_8g201920 PE=4 SV=1
TRINITY_DN5201_c0_g1_i1	2288	233.03	0.35	3.16	0	2.18	0	-10.7646	tr|A0A0K9RMR5|A0A0K9RMR5_SPIOL Uncharacterized protein OS=Spinacia oleracea OX=3562 GN=SOVF_049160 PE=4 SV=1
TRINITY_DN575_c0_g2_i6	2992	232.5	0	2.37	0	1.63	0	-10.7584	tr|A0A0K9QES6|A0A0K9QES6_SPIOL Uncharacterized protein OS=Spinacia oleracea OX=3562 GN=SOVF_187180 PE=4 SV=1
TRINITY_DN16130_c0_g1_i1	851	231	0	9.9	0	6.82	0	-10.7522	-
TRINITY_DN3009_c0_g1_i2	3553	230.58	0	1.96	0	1.35	0	-10.7522	tr|A0A0K9R0Z2|A0A0K9R0Z2_SPIOL Uncharacterized protein OS=Spinacia oleracea OX=3562 GN=SOVF_118940 PE=4 SV=1
TRINITY_DN1463_c0_g1_i4	5295	227.08	0.01	1.27	0	0.88	0	-10.727	tr|A0A0K9Q7Z8|A0A0K9Q7Z8_SPIOL Uncharacterized protein OS=Spinacia oleracea OX=3562 GN=SOVF_209470 PE=3 SV=1
TRINITY_DN2175_c0_g2_i5	2558	225.18	0	2.71	0	1.87	0	-10.7143	tr|A0A0K9QW99|A0A0K9QW99_SPIOL Uncharacterized protein OS=Spinacia oleracea OX=3562 GN=SOVF_134010 PE=4 SV=1
TRINITY_DN3396_c0_g1_i1	5739	223.69	0	1.15	0	0.79	0	-10.7078	tr|A0A0K9RZA4|A0A0K9RZA4_SPIOL Uncharacterized protein OS=Spinacia oleracea OX=3562 GN=SOVF_011940 PE=4 SV=1
TRINITY_DN3957_c1_g1_i18	4153	222.98	0	1.61	0	1.11	0	-10.7014	tr|A0A0K9QSJ7|A0A0K9QSJ7_SPIOL Uncharacterized protein OS=Spinacia oleracea OX=3562 GN=SOVF_146580 PE=4 SV=1
TRINITY_DN7096_c0_g1_i6	3792	223.2	0	1.77	0	1.22	0	-10.7014	tr|A0A0K9QSI4|A0A0K9QSI4_SPIOL Uncharacterized protein OS=Spinacia oleracea OX=3562 GN=SOVF_152990 PE=4 SV=1
TRINITY_DN1026_c1_g1_i3	652	221.32	0	13.51	0	9.32	0	-10.6884	tr|A0A0K9QM90|A0A0K9QM90_SPIOL Uncharacterized protein OS=Spinacia oleracea OX=3562 GN=SOVF_168490 PE=4 SV=1
TRINITY_DN1466_c1_g1_i13	4812	221.03	0	1.36	0	0.94	0	-10.6884	tr|A0A0K9QPV0|A0A0K9QPV0_SPIOL Uncharacterized protein OS=Spinacia oleracea OX=3562 GN=SOVF_154870 PE=4 SV=1
TRINITY_DN1988_c0_g1_i9	3733	220.79	0	1.78	0	1.23	0	-10.6884	tr|A0A0K9R0X6|A0A0K9R0X6_SPIOL Uncharacterized protein OS=Spinacia oleracea OX=3562 GN=SOVF_125820 PE=4 SV=1
TRINITY_DN166_c0_g2_i3	1789	220.16	0	3.92	0	2.7	0	-10.6819	tr|A0A0K9QY78|A0A0K9QY78_SPIOL Uncharacterized protein OS=Spinacia oleracea OX=3562 GN=SOVF_128040 PE=4 SV=1
TRINITY_DN3031_c0_g1_i2	3546	219	0	1.86	0	1.28	0	-10.6753	tr|A0A0K9R4F8|A0A0K9R4F8_SPIOL Uncharacterized protein OS=Spinacia oleracea OX=3562 GN=SOVF_107880 PE=4 SV=1
TRINITY_DN7114_c0_g2_i15	4911	219.3	0	1.33	0	0.91	0	-10.6753	tr|E2DMZ5|E2DMZ5_BETVU Uncharacterized protein OS=Beta vulgaris OX=161934 PE=4 SV=1
TRINITY_DN56_c0_g1_i8	1190	218.28	0	6.2	0	4.27	0	-10.6687	tr|A0A0K9RAZ0|A0A0K9RAZ0_SPIOL Flavin-containing monooxygenase OS=Spinacia oleracea OX=3562 GN=SOVF_087100 PE=3 SV=1
TRINITY_DN2578_c0_g1_i12	2474	216.59	0	2.7	0	1.86	0	-10.6621	tr|A0A0K9RX16|A0A0K9RX16_SPIOL Uncharacterized protein OS=Spinacia oleracea OX=3562 GN=SOVF_024480 PE=4 SV=1
TRINITY_DN11019_c0_g1_i1	2498	216.38	0	2.67	0	1.84	0	-10.6554	tr|A0A0K9R1T8|A0A0K9R1T8_SPIOL Uncharacterized protein OS=Spinacia oleracea OX=3562 GN=SOVF_116780 PE=4 SV=1
TRINITY_DN1158_c1_g2_i1	4032	213.68	0	1.59	0	1.09	0	-10.642	tr|A0A0K9R1F6|A0A0K9R1F6_SPIOL Uncharacterized protein OS=Spinacia oleracea OX=3562 GN=SOVF_117790 PE=3 SV=1
TRINITY_DN1593_c0_g1_i3	4099	214.37	0	1.56	0	1.08	0	-10.642	tr|A0A0K9QN65|A0A0K9QN65_SPIOL Uncharacterized protein OS=Spinacia oleracea OX=3562 GN=SOVF_166280 PE=4 SV=1
TRINITY_DN9268_c0_g1_i2	2761	214.26	0	2.38	0	1.64	0	-10.642	tr|A0A0K9R5B7|A0A0K9R5B7_SPIOL Uncharacterized protein OS=Spinacia oleracea OX=3562 GN=SOVF_104500 PE=3 SV=1
TRINITY_DN12237_c0_g4_i5	2481	212.96	0	2.65	0	1.83	0	-10.6352	tr|A0A0K9QH21|A0A0K9QH21_SPIOL Uncharacterized protein OS=Spinacia oleracea OX=3562 GN=SOVF_180330 PE=4 SV=1
TRINITY_DN4653_c0_g1_i1	1842	213	0	3.67	0	2.53	0	-10.6352	tr|A0A0K9QRD8|A0A0K9QRD8_SPIOL Uncharacterized protein OS=Spinacia oleracea OX=3562 GN=SOVF_155300 PE=4 SV=1
TRINITY_DN6376_c0_g1_i6	1684	212	0	4.04	0	2.78	0	-10.6285	tr|A0A0K9RE61|A0A0K9RE61_SPIOL Uncharacterized protein OS=Spinacia oleracea OX=3562 GN=SOVF_076930 PE=4 SV=1
TRINITY_DN1319_c1_g1_i5	4186	211	0	1.51	0	1.04	0	-10.6216	tr|A0A0K9QEZ4|A0A0K9QEZ4_SPIOL Uncharacterized protein OS=Spinacia oleracea OX=3562 GN=SOVF_191620 PE=4 SV=1
TRINITY_DN3957_c1_g1_i17	4262	211.04	0	1.48	0	1.02	0	-10.6216	tr|A0A0K9QSJ7|A0A0K9QSJ7_SPIOL Uncharacterized protein OS=Spinacia oleracea OX=3562 GN=SOVF_146580 PE=4 SV=1
TRINITY_DN3872_c0_g1_i1	2312	209.79	0	2.82	0	1.94	0	-10.6148	tr|A0A0K9S0U5|A0A0K9S0U5_SPIOL Uncharacterized protein OS=Spinacia oleracea OX=3562 GN=SOVF_007040 PE=4 SV=1
TRINITY_DN557_c0_g1_i7	1487	210.21	0	4.61	0	3.18	0	-10.6148	tr|A0A0K9S0E6|A0A0K9S0E6_SPIOL Uncharacterized protein OS=Spinacia oleracea OX=3562 GN=SOVF_008470 PE=4 SV=1
TRINITY_DN7461_c0_g1_i3	999	210.23	0	7.37	0	5.08	0	-10.6148	tr|A0A0K9RZY7|A0A0K9RZY7_SPIOL Reticulon-like protein OS=Spinacia oleracea OX=3562 GN=SOVF_014800 PE=4 SV=1
TRINITY_DN8442_c0_g1_i1	1560	210	0	4.36	0	3.01	0	-10.6148	tr|A0A0K9QER5|A0A0K9QER5_SPIOL Uncharacterized protein OS=Spinacia oleracea OX=3562 GN=SOVF_193070 PE=4 SV=1
TRINITY_DN4521_c0_g1_i2	11288	207.99	0	0.54	0	0.37	0	-10.601	tr|A0A0K9RKK8|A0A0K9RKK8_SPIOL Uncharacterized protein OS=Spinacia oleracea OX=3562 GN=SOVF_061310 PE=4 SV=1
TRINITY_DN3853_c0_g1_i4	2530	206.92	0	2.52	0	1.74	0	-10.594	tr|G5DXP8|G5DXP8_SILLA Aldose 1-epimerase family protein (Fragment) OS=Silene latifolia OX=37657 PE=2 SV=1
TRINITY_DN920_c0_g1_i14	1920	207.22	0	3.41	0	2.35	0	-10.594	tr|A0A0K9RK74|A0A0K9RK74_SPIOL Uncharacterized protein OS=Spinacia oleracea OX=3562 GN=SOVF_063450 PE=4 SV=1
TRINITY_DN1526_c0_g1_i5	1612	205.52	0	4.11	0	2.84	0	-10.5871	tr|A0A0K9QSS9|A0A0K9QSS9_SPIOL Histone H3 OS=Spinacia oleracea OX=3562 GN=SOVF_037400 PE=3 SV=1
TRINITY_DN1549_c0_g2_i2	1234	206.34	0	5.62	0	3.87	0	-10.5871	tr|A0A0K9RJV0|A0A0K9RJV0_SPIOL Uncharacterized protein OS=Spinacia oleracea OX=3562 GN=SOVF_063780 PE=4 SV=1
TRINITY_DN3410_c0_g1_i5	1497	205.65	0.02	4.48	0	3.09	0	-10.5871	tr|A0A0K9QRA6|A0A0K9QRA6_SPIOL Uncharacterized protein OS=Spinacia oleracea OX=3562 GN=SOVF_150810 PE=4 SV=1
TRINITY_DN2309_c1_g2_i3	4227	204.97	0.02	1.45	0	1	0	-10.5801	tr|A0A0K9RPJ8|A0A0K9RPJ8_SPIOL Uncharacterized protein OS=Spinacia oleracea OX=3562 GN=SOVF_049410 PE=4 SV=1
TRINITY_DN541_c0_g1_i4	3153	204.88	0	1.97	0	1.36	0	-10.5801	tr|O64983|O64983_SPIOL Fructose-6-phosphate 2-kinase/fructose-2,6-bisphosphatase OS=Spinacia oleracea OX=3562 GN=SOVF_135300 PE=2 SV=1
TRINITY_DN2569_c0_g1_i2	5804	204.25	0	1.04	0	0.72	0	-10.573	tr|A0A0K9RRB5|A0A0K9RRB5_SPIOL Uncharacterized protein OS=Spinacia oleracea OX=3562 GN=SOVF_043040 PE=4 SV=1
TRINITY_DN3016_c0_g1_i10	1298	203.15	0	5.21	0	3.59	0	-10.5659	tr|Q8LL67|Q8LL67_AMAHP Polyamine oxidase OS=Amaranthus hypochondriacus OX=28502 PE=2 SV=1
TRINITY_DN250_c0_g1_i1	2619	202.33	0.1	2.37	0	1.64	0	-10.5588	tr|A0A0K9QR13|A0A0K9QR13_SPIOL Uncharacterized protein OS=Spinacia oleracea OX=3562 GN=SOVF_157820 PE=4 SV=1
TRINITY_DN4105_c0_g1_i7	4999	202.18	0	1.2	0	0.83	0	-10.5588	tr|A0A0K9QFS8|A0A0K9QFS8_SPIOL Uncharacterized protein OS=Spinacia oleracea OX=3562 GN=SOVF_189310 PE=4 SV=1
TRINITY_DN1242_c1_g1_i9	5418	200.98	0	1.1	0	0.76	0	-10.5516	tr|A0A0K9RFJ3|A0A0K9RFJ3_SPIOL Uncharacterized protein OS=Spinacia oleracea OX=3562 GN=SOVF_076090 PE=4 SV=1
TRINITY_DN196_c3_g1_i5	2089	199.6	0	2.99	0	2.06	0	-10.5445	tr|A0A0K9RQL7|A0A0K9RQL7_SPIOL Uncharacterized protein OS=Spinacia oleracea OX=3562 GN=SOVF_045440 PE=4 SV=1
TRINITY_DN7973_c0_g1_i5	2942	198.71	0	2.06	0	1.42	0	-10.5372	tr|A0A0K9R1I4|A0A0K9R1I4_SPIOL Mitogen-activated protein kinase OS=Spinacia oleracea OX=3562 GN=SOVF_117550 PE=3 SV=1
TRINITY_DN987_c0_g1_i31	3928	199.02	0	1.52	0	1.05	0	-10.5372	tr|A0A0K9QF84|A0A0K9QF84_SPIOL Uncharacterized protein OS=Spinacia oleracea OX=3562 GN=SOVF_191370 PE=3 SV=1
TRINITY_DN1337_c0_g1_i11	3272	198.23	0	1.83	0	1.26	0	-10.53	-
TRINITY_DN1098_c0_g1_i4	2801	197.12	0	2.15	0	1.48	0	-10.5227	tr|A0A0K9R370|A0A0K9R370_SPIOL Uncharacterized protein OS=Spinacia oleracea OX=3562 GN=SOVF_111830 PE=4 SV=1
TRINITY_DN6425_c0_g2_i1	1263	197.43	0	5.23	0	3.6	0	-10.5227	-
TRINITY_DN440_c0_g2_i11	3685	195.39	0	1.59	0	1.1	0	-10.5079	tr|A0A0K9QHY1|A0A0K9QHY1_SPIOL Uncharacterized protein OS=Spinacia oleracea OX=3562 GN=SOVF_182590 PE=4 SV=1
TRINITY_DN446_c0_g3_i1	673	195	0	11.39	0	7.86	0	-10.5079	tr|A0A0K9QYB7|A0A0K9QYB7_SPIOL Uncharacterized protein OS=Spinacia oleracea OX=3562 GN=SOVF_127710 PE=3 SV=1
TRINITY_DN15625_c0_g2_i1	911	194.3	0	7.64	0	5.27	0	-10.5005	-
TRINITY_DN6949_c0_g2_i1	3689	194	0	1.58	0	1.09	0	-10.5005	tr|F4NCG3|F4NCG3_BETVU Uncharacterized protein OS=Beta vulgaris subsp. vulgaris OX=3555 PE=4 SV=1
TRINITY_DN6961_c0_g2_i4	2247	194.42	0	2.69	0	1.86	0	-10.5005	tr|A0A0K9QR37|A0A0K9QR37_SPIOL Uncharacterized protein OS=Spinacia oleracea OX=3562 GN=SOVF_151380 PE=4 SV=1
TRINITY_DN1732_c0_g3_i2	616	191.53	0	12.67	0	8.73	0	-10.4856	-
TRINITY_DN388_c0_g1_i4	2192	191.55	0.21	2.73	0	1.88	0	-10.4856	tr|A0A0K9RD07|A0A0K9RD07_SPIOL Uncharacterized protein OS=Spinacia oleracea OX=3562 GN=SOVF_085260 PE=3 SV=1
TRINITY_DN305_c0_g1_i2	2859	190.1	0	2.03	0	1.4	0	-10.4705	tr|A0A0K9RDJ5|A0A0K9RDJ5_SPIOL Uncharacterized protein OS=Spinacia oleracea OX=3562 GN=SOVF_084920 PE=4 SV=1
TRINITY_DN6723_c0_g1_i1	3167	190.22	0	1.82	0	1.26	0	-10.4705	tr|A0A0K9RK95|A0A0K9RK95_SPIOL Uncharacterized protein OS=Spinacia oleracea OX=3562 GN=SOVF_063210 PE=4 SV=1
TRINITY_DN1319_c0_g1_i5	2224	188.58	0	2.64	0	1.82	0	-10.4629	tr|A0A0K9R4F7|A0A0K9R4F7_SPIOL Uncharacterized protein OS=Spinacia oleracea OX=3562 GN=SOVF_107950 PE=4 SV=1
TRINITY_DN1811_c0_g2_i9	4188	188.97	0	1.35	0	0.93	0	-10.4629	tr|A0A0K9QWX8|A0A0K9QWX8_SPIOL Uncharacterized protein OS=Spinacia oleracea OX=3562 GN=SOVF_137380 PE=4 SV=1
TRINITY_DN2953_c0_g1_i1	1223	188.94	0	5.2	0	3.58	0	-10.4629	-
TRINITY_DN3641_c0_g1_i1	1491	187	0	4.09	0	2.82	0	-10.4476	tr|A0A0K9QTP4|A0A0K9QTP4_SPIOL Uncharacterized protein OS=Spinacia oleracea OX=3562 GN=SOVF_147500 PE=4 SV=1
TRINITY_DN3878_c0_g4_i2	1671	186.86	0	3.59	0	2.48	0	-10.4476	-
TRINITY_DN4261_c1_g2_i1	1221	186.67	0	5.14	0	3.55	0	-10.4476	tr|A0A1B3TNU5|A0A1B3TNU5_MIRJA RNaseH OS=Mirabilis jalapa OX=3538 PE=4 SV=1
TRINITY_DN699_c0_g4_i2	1009	186.89	0	6.47	0	4.46	0	-10.4476	-
TRINITY_DN8751_c0_g1_i3	581	186.56	0	13.43	0	9.26	0	-10.4476	-
TRINITY_DN557_c0_g1_i12	1617	186.28	0	3.71	0	2.56	0	-10.4398	tr|A0A0K9S0E6|A0A0K9S0E6_SPIOL Uncharacterized protein OS=Spinacia oleracea OX=3562 GN=SOVF_008470 PE=4 SV=1
TRINITY_DN8191_c0_g1_i6	4816	185.66	0.04	1.15	0	0.79	0	-10.4398	tr|A0A0K9RDN4|A0A0K9RDN4_SPIOL Uncharacterized protein OS=Spinacia oleracea OX=3562 GN=SOVF_078890 PE=3 SV=1
TRINITY_DN842_c0_g1_i25	3413	186.16	0	1.65	0	1.14	0	-10.4398	tr|A0A0K9S3U4|A0A0K9S3U4_SPIOL Vacuolar cation/proton exchanger OS=Spinacia oleracea OX=3562 GN=SOVF_002360 PE=3 SV=1
TRINITY_DN2463_c0_g1_i3	2927	185.19	0.12	1.93	0	1.33	0	-10.4321	tr|A0A0K9R9I0|A0A0K9R9I0_SPIOL Uncharacterized protein OS=Spinacia oleracea OX=3562 GN=SOVF_096370 PE=3 SV=1
TRINITY_DN1022_c0_g2_i5	3572	184.22	0	1.55	0	1.07	0	-10.4242	tr|A0A0K9QQB6|A0A0K9QQB6_SPIOL Uncharacterized protein OS=Spinacia oleracea OX=3562 GN=SOVF_153540 PE=4 SV=1
TRINITY_DN11384_c0_g1_i8	4128	184.36	0	1.34	0	0.92	0	-10.4242	tr|A0A0K9QC56|A0A0K9QC56_SPIOL Uncharacterized protein OS=Spinacia oleracea OX=3562 GN=SOVF_195700 PE=4 SV=1
TRINITY_DN11544_c0_g2_i8	2798	184.13	0	2.01	0	1.39	0	-10.4242	tr|A0A0K9R0S9|A0A0K9R0S9_SPIOL Uncharacterized protein OS=Spinacia oleracea OX=3562 GN=SOVF_119700 PE=4 SV=1
TRINITY_DN1157_c1_g1_i14	1632	183.81	0	3.63	0	2.5	0	-10.4242	tr|A0A0K9RI90|A0A0K9RI90_SPIOL Uncharacterized protein OS=Spinacia oleracea OX=3562 GN=SOVF_069020 PE=4 SV=1
TRINITY_DN17802_c0_g1_i3	4545	184.26	0	1.21	0	0.83	0	-10.4242	tr|A0A0K9Q7D9|A0A0K9Q7D9_SPIOL RING-type E3 ubiquitin transferase OS=Spinacia oleracea OX=3562 GN=SOVF_212070 PE=4 SV=1
TRINITY_DN4329_c0_g2_i5	2753	184.31	0	2.05	0	1.41	0	-10.4242	tr|A0A0K9R2K7|A0A0K9R2K7_SPIOL Uncharacterized protein OS=Spinacia oleracea OX=3562 GN=SOVF_114050 PE=4 SV=1
TRINITY_DN1105_c1_g1_i4	5223	183.12	0	1.04	0	0.72	0	-10.4164	tr|A0A0K9QP25|A0A0K9QP25_SPIOL Uncharacterized protein OS=Spinacia oleracea OX=3562 GN=SOVF_157710 PE=4 SV=1
TRINITY_DN79_c1_g1_i25	7709	182.61	0	0.69	0	0.48	0	-10.4164	tr|A0A0K9RKR3|A0A0K9RKR3_SPIOL Uncharacterized protein OS=Spinacia oleracea OX=3562 GN=SOVF_055530 PE=4 SV=1
TRINITY_DN1579_c2_g1_i1	842	182	0	7.9	0	5.45	0	-10.4085	-
TRINITY_DN2040_c0_g2_i22	3434	181.87	0	1.6	0	1.1	0	-10.4085	tr|A0A0K9QHW5|A0A0K9QHW5_SPIOL Alpha-mannosidase OS=Spinacia oleracea OX=3562 GN=SOVF_177470 PE=3 SV=1
TRINITY_DN2660_c0_g2_i18	3205	181.73	0	1.72	0	1.19	0	-10.4085	tr|A0A0K9QRM2|A0A0K9QRM2_SPIOL Uncharacterized protein OS=Spinacia oleracea OX=3562 GN=SOVF_156170 PE=4 SV=1
TRINITY_DN678_c0_g1_i2	6661	181.78	0	0.8	0	0.55	0	-10.4085	tr|A0A0K9QKZ5|A0A0K9QKZ5_SPIOL Uncharacterized protein OS=Spinacia oleracea OX=3562 GN=SOVF_173710 PE=3 SV=1
TRINITY_DN15211_c0_g1_i8	5970	180.66	0.19	0.89	0	0.62	0	-10.4005	tr|A0A0K9RY90|A0A0K9RY90_SPIOL CASP-like protein OS=Spinacia oleracea OX=3562 GN=SOVF_021050 PE=3 SV=1
TRINITY_DN2446_c0_g1_i2	2452	180.68	0	2.28	0	1.57	0	-10.4005	tr|A0A0K9R117|A0A0K9R117_SPIOL Uncharacterized protein OS=Spinacia oleracea OX=3562 GN=SOVF_125320 PE=3 SV=1
TRINITY_DN389_c0_g1_i11	3816	181.27	0	1.43	0	0.98	0	-10.4005	tr|A0A0J8BFC7|A0A0J8BFC7_BETVU Uncharacterized protein OS=Beta vulgaris subsp. vulgaris OX=3555 GN=BVRB_019340 PE=4 SV=1
TRINITY_DN5965_c0_g1_i15	1131	181.14	0	5.47	0	3.77	0	-10.4005	tr|A0A0K9R7D9|A0A0K9R7D9_SPIOL Uncharacterized protein OS=Spinacia oleracea OX=3562 GN=SOVF_102900 PE=4 SV=1
TRINITY_DN1667_c0_g1_i8	2248	179.83	0	2.49	0	1.72	0	-10.3926	tr|A0A0K9QJ11|A0A0K9QJ11_SPIOL Uncharacterized protein OS=Spinacia oleracea OX=3562 GN=SOVF_173660 PE=4 SV=1
TRINITY_DN617_c1_g1_i7	5082	179.72	0.21	1.05	0	0.72	0	-10.3926	tr|A0A0K9QEM4|A0A0K9QEM4_SPIOL Uncharacterized protein OS=Spinacia oleracea OX=3562 GN=SOVF_193430 PE=4 SV=1
TRINITY_DN8341_c0_g1_i9	377	180.18	0	26.53	0	18.29	0	-10.3926	tr|A0A0K9QKR5|A0A0K9QKR5_SPIOL Uncharacterized protein OS=Spinacia oleracea OX=3562 GN=SOVF_168200 PE=4 SV=1
TRINITY_DN8527_c0_g1_i3	498	179.73	0	16.35	0	11.27	0	-10.3926	-
TRINITY_DN3034_c1_g2_i2	2013	178.61	0	2.79	0	1.92	0	-10.3845	tr|A0A0K9QU95|A0A0K9QU95_SPIOL Uncharacterized protein OS=Spinacia oleracea OX=3562 GN=SOVF_140430 PE=4 SV=1
TRINITY_DN3802_c0_g1_i1	2610	178.9	0.03	2.11	0	1.45	0	-10.3845	tr|A0A0K9QKL0|A0A0K9QKL0_SPIOL Uncharacterized protein OS=Spinacia oleracea OX=3562 GN=SOVF_168760 PE=3 SV=1
TRINITY_DN579_c0_g1_i33	4519	178.7	0	1.18	0	0.81	0	-10.3845	tr|A0A0K9QYF0|A0A0K9QYF0_SPIOL Uncharacterized protein OS=Spinacia oleracea OX=3562 GN=SOVF_132420 PE=4 SV=1
TRINITY_DN5383_c0_g1_i4	3980	178.32	0	1.34	0	0.93	0	-10.3764	tr|A0A0K9R663|A0A0K9R663_SPIOL Uncharacterized protein OS=Spinacia oleracea OX=3562 GN=SOVF_101700 PE=4 SV=1
TRINITY_DN3016_c0_g1_i7	1964	12423.5	8.2	199.43	0.14	137.51	0.09	-10.3718	tr|Q8LL67|Q8LL67_AMAHP Polyamine oxidase OS=Amaranthus hypochondriacus OX=28502 PE=2 SV=1
TRINITY_DN920_c0_g1_i13	1055	177.28	0	5.82	0	4.01	0	-10.3683	tr|A0A0K9RK74|A0A0K9RK74_SPIOL Uncharacterized protein OS=Spinacia oleracea OX=3562 GN=SOVF_063450 PE=4 SV=1
TRINITY_DN4244_c0_g1_i2	3846	175.13	0	1.37	0	0.94	0	-10.3519	tr|A0A0K9R529|A0A0K9R529_SPIOL Uncharacterized protein OS=Spinacia oleracea OX=3562 GN=SOVF_106020 PE=4 SV=1
TRINITY_DN5965_c0_g1_i7	1833	174.02	0	3.02	0	2.08	0	-10.3437	tr|A0A0K9R7D9|A0A0K9R7D9_SPIOL Uncharacterized protein OS=Spinacia oleracea OX=3562 GN=SOVF_102900 PE=4 SV=1
TRINITY_DN893_c0_g2_i13	1663	174.04	0	3.36	0	2.32	0	-10.3437	tr|A0A0K9S293|A0A0K9S293_SPIOL Uncharacterized protein OS=Spinacia oleracea OX=3562 GN=SOVF_001770 PE=4 SV=1
TRINITY_DN319_c0_g1_i8	1278	173.09	0	4.52	0	3.12	0	-10.3354	-
TRINITY_DN6051_c0_g2_i5	3450	173.32	0.02	1.52	0	1.05	0	-10.3354	tr|A0A0K9RLD7|A0A0K9RLD7_SPIOL Uncharacterized protein OS=Spinacia oleracea OX=3562 GN=SOVF_053410 PE=4 SV=1
TRINITY_DN1236_c0_g1_i8	2779	172.33	0	1.9	0	1.31	0	-10.327	tr|A0A0K9RRH1|A0A0K9RRH1_SPIOL Uncharacterized protein OS=Spinacia oleracea OX=3562 GN=SOVF_037240 PE=4 SV=1
TRINITY_DN1817_c0_g1_i9	4984	171.71	0	1.02	0	0.7	0	-10.327	tr|A0A0K9S059|A0A0K9S059_SPIOL Uncharacterized protein OS=Spinacia oleracea OX=3562 GN=SOVF_009340 PE=4 SV=1
TRINITY_DN6962_c1_g1_i1	3059	171	0	1.7	0	1.17	0	-10.3186	-
TRINITY_DN7278_c1_g1_i3	2424	170.29	0	2.17	0	1.5	0	-10.3102	tr|A0A0K9QKS5|A0A0K9QKS5_SPIOL Uncharacterized protein OS=Spinacia oleracea OX=3562 GN=SOVF_168060 PE=4 SV=1
TRINITY_DN13704_c0_g3_i3	726	169.05	0	8.91	0	6.14	0	-10.3017	tr|A0A0K9QH58|A0A0K9QH58_SPIOL Uncharacterized protein OS=Spinacia oleracea OX=3562 GN=SOVF_185920 PE=3 SV=1
TRINITY_DN3936_c0_g1_i8	3567	169.21	0	1.43	0	0.99	0	-10.3017	tr|A0A0K9RYF5|A0A0K9RYF5_SPIOL Acyl-coenzyme A oxidase OS=Spinacia oleracea OX=3562 GN=SOVF_014550 PE=3 SV=1
TRINITY_DN4502_c0_g1_i3	2335	166.82	0	2.22	0	1.53	0	-10.2845	tr|A0A0K9RHL0|A0A0K9RHL0_SPIOL Chlorophyll a-b binding protein, chloroplastic OS=Spinacia oleracea OX=3562 GN=SOVF_065920 PE=3 SV=1
TRINITY_DN4976_c0_g2_i5	482	167.37	0	16.04	0	11.06	0	-10.2845	-
TRINITY_DN5768_c1_g1_i8	4078	166.57	0	1.22	0	0.84	0	-10.2845	-
TRINITY_DN2171_c0_g1_i27	3121	166.25	0	1.62	0	1.12	0	-10.2758	tr|A0A0K9Q9C2|A0A0K9Q9C2_SPIOL Uncharacterized protein OS=Spinacia oleracea OX=3562 GN=SOVF_204920 PE=4 SV=1
TRINITY_DN247_c0_g1_i18	4384	166.33	0	1.13	0	0.78	0	-10.2758	tr|A0A0K9QUD1|A0A0K9QUD1_SPIOL Uncharacterized protein OS=Spinacia oleracea OX=3562 GN=SOVF_145490 PE=3 SV=1
TRINITY_DN4767_c0_g1_i3	4059	164.92	0.02	1.22	0	0.84	0	-10.2671	tr|A0A0K9RE76|A0A0K9RE76_SPIOL Uncharacterized protein OS=Spinacia oleracea OX=3562 GN=SOVF_082820 PE=4 SV=1
TRINITY_DN489_c0_g1_i9	1694	165.1	0	3.12	0	2.15	0	-10.2671	tr|A0A0K9RS48|A0A0K9RS48_SPIOL Uncharacterized protein (Fragment) OS=Spinacia oleracea OX=3562 GN=SOVF_041550 PE=4 SV=1
TRINITY_DN5926_c0_g1_i2	2957	164.75	0	1.7	0	1.17	0	-10.2671	tr|A0A0K9RI43|A0A0K9RI43_SPIOL Uncharacterized protein OS=Spinacia oleracea OX=3562 GN=SOVF_064450 PE=4 SV=1
TRINITY_DN9114_c0_g3_i1	2146	164.62	0	2.4	0	1.65	0	-10.2671	tr|A0A0K9RMA0|A0A0K9RMA0_SPIOL Uncharacterized protein OS=Spinacia oleracea OX=3562 GN=SOVF_050650 PE=4 SV=1
TRINITY_DN2633_c0_g1_i4	3895	164.24	0	1.26	0	0.87	0	-10.2584	tr|A0A0K9QZ46|A0A0K9QZ46_SPIOL Uncharacterized protein OS=Spinacia oleracea OX=3562 GN=SOVF_125100 PE=4 SV=1
TRINITY_DN3692_c0_g1_i5	1475	164.5	0	3.64	0	2.51	0	-10.2584	-
TRINITY_DN606_c0_g2_i6	1768	161.76	0	2.92	0	2.01	0	-10.2407	tr|A0A0K9QSC1|A0A0K9QSC1_SPIOL Uncharacterized protein OS=Spinacia oleracea OX=3562 GN=SOVF_147040 PE=4 SV=1
TRINITY_DN904_c1_g1_i8	1993	161	0	2.54	0	1.75	0	-10.2317	tr|J3S7K7|J3S7K7_BETVU Mariner transposase OS=Beta vulgaris subsp. vulgaris OX=3555 PE=4 SV=1
TRINITY_DN12566_c1_g1_i2	888	160.01	0	6.49	0	4.48	0	-10.2228	-
TRINITY_DN3057_c0_g1_i6	2533	160.48	0	1.95	0	1.35	0	-10.2228	tr|A0A0K9RP36|A0A0K9RP36_SPIOL Uncharacterized protein OS=Spinacia oleracea OX=3562 GN=SOVF_050460 PE=4 SV=1
TRINITY_DN3252_c0_g2_i4	4543	159.55	0	1.05	0	0.72	0	-10.2228	tr|F4NCG1|F4NCG1_BETVU Uncharacterized protein OS=Beta vulgaris subsp. vulgaris OX=3555 PE=4 SV=1
TRINITY_DN5172_c0_g2_i15	3364	159.78	0	1.44	0	0.99	0	-10.2228	tr|A0A0J8DZV1|A0A0J8DZV1_BETVU Uncharacterized protein OS=Beta vulgaris subsp. vulgaris OX=3555 GN=BVRB_9g225660 PE=4 SV=1
TRINITY_DN569_c0_g1_i10	4150	160.06	0	1.15	0	0.8	0	-10.2228	tr|A0A0K9RKN5|A0A0K9RKN5_SPIOL Uncharacterized protein OS=Spinacia oleracea OX=3562 GN=SOVF_055650 PE=4 SV=1
TRINITY_DN1888_c0_g2_i4	1437	158.66	0	3.62	0	2.49	0	-10.2137	tr|A0A0K9QXF7|A0A0K9QXF7_SPIOL Uncharacterized protein OS=Spinacia oleracea OX=3562 GN=SOVF_135700 PE=4 SV=1
TRINITY_DN388_c0_g1_i7	2612	158.72	0	1.87	0	1.29	0	-10.2137	tr|A0A0K9RD07|A0A0K9RD07_SPIOL Uncharacterized protein OS=Spinacia oleracea OX=3562 GN=SOVF_085260 PE=3 SV=1
TRINITY_DN3410_c0_g1_i9	1545	158.15	0.02	3.32	0	2.29	0	-10.2046	tr|A0A0K9QRA6|A0A0K9QRA6_SPIOL Uncharacterized protein OS=Spinacia oleracea OX=3562 GN=SOVF_150810 PE=4 SV=1
TRINITY_DN4521_c0_g1_i1	11423	157.95	0	0.4	0	0.28	0	-10.2046	tr|A0A0K9RKK8|A0A0K9RKK8_SPIOL Uncharacterized protein OS=Spinacia oleracea OX=3562 GN=SOVF_061310 PE=4 SV=1
TRINITY_DN6131_c0_g1_i8	5481	158.12	0	0.85	0	0.59	0	-10.2046	tr|F4NCG1|F4NCG1_BETVU Uncharacterized protein OS=Beta vulgaris subsp. vulgaris OX=3555 PE=4 SV=1
TRINITY_DN7171_c1_g1_i3	1970	157.84	0	2.53	0	1.74	0	-10.2046	tr|A0A0K9R8G5|A0A0K9R8G5_SPIOL Dihydrolipoyl dehydrogenase OS=Spinacia oleracea OX=3562 GN=SOVF_094530 PE=3 SV=1
TRINITY_DN8120_c0_g1_i2	2778	157.02	0	1.73	0	1.19	0	-10.1955	tr|A0A0K9R529|A0A0K9R529_SPIOL Uncharacterized protein OS=Spinacia oleracea OX=3562 GN=SOVF_106020 PE=4 SV=1
TRINITY_DN1655_c0_g1_i3	1444	154.57	0	3.51	0	2.42	0	-10.177	tr|A0A0K9S365|A0A0K9S365_SPIOL Uncharacterized protein OS=Spinacia oleracea OX=3562 GN=SOVF_005670 PE=4 SV=1
TRINITY_DN2510_c0_g1_i2	2493	155.24	0	1.92	0	1.32	0	-10.177	tr|A0A0K9R829|A0A0K9R829_SPIOL Uncharacterized protein OS=Spinacia oleracea OX=3562 GN=SOVF_102700 PE=4 SV=1
TRINITY_DN4676_c0_g1_i2	2683	154.53	0	1.77	0	1.22	0	-10.177	tr|A0A0K9QUH2|A0A0K9QUH2_SPIOL Uncharacterized protein OS=Spinacia oleracea OX=3562 GN=SOVF_147260 PE=4 SV=1
TRINITY_DN5794_c0_g1_i3	2163	154.55	0	2.23	0	1.54	0	-10.177	-
TRINITY_DN6131_c0_g1_i2	5504	155.2	0	0.83	0	0.57	0	-10.177	tr|F4NCG1|F4NCG1_BETVU Uncharacterized protein OS=Beta vulgaris subsp. vulgaris OX=3555 PE=4 SV=1
TRINITY_DN987_c0_g1_i28	3718	155.22	0	1.26	0	0.87	0	-10.177	tr|A0A0K9QF84|A0A0K9QF84_SPIOL Uncharacterized protein OS=Spinacia oleracea OX=3562 GN=SOVF_191370 PE=3 SV=1
TRINITY_DN1017_c0_g1_i8	3426	154.43	0	1.36	0	0.94	0	-10.1677	-
TRINITY_DN1432_c0_g1_i11	5788	154.04	0	0.79	0	0.54	0	-10.1677	tr|A0A0K9Q9R4|A0A0K9Q9R4_SPIOL Uncharacterized protein OS=Spinacia oleracea OX=3562 GN=SOVF_203820 PE=4 SV=1
TRINITY_DN2149_c0_g1_i31	2554	153.52	0	1.85	0	1.28	0	-10.1677	tr|A0A0K9RFE8|A0A0K9RFE8_SPIOL Uncharacterized protein OS=Spinacia oleracea OX=3562 GN=SOVF_073040 PE=4 SV=1
TRINITY_DN6303_c1_g1_i11	1363	153.91	0	3.73	0	2.57	0	-10.1677	tr|A0A0K9RCV1|A0A0K9RCV1_SPIOL Protein yippee-like OS=Spinacia oleracea OX=3562 GN=SOVF_081200 PE=3 SV=1
TRINITY_DN855_c0_g1_i2	1777	154.18	0	2.77	0	1.91	0	-10.1677	tr|A0A0K9R2C5|A0A0K9R2C5_SPIOL Uncharacterized protein OS=Spinacia oleracea OX=3562 GN=SOVF_114840 PE=3 SV=1
TRINITY_DN4453_c0_g2_i1	676	153	0	8.89	0	6.13	0	-10.1583	-
TRINITY_DN4039_c0_g2_i2	2319	152.16	0	2.04	0	1.4	0	-10.1488	tr|A0A0K9QPD9|A0A0K9QPD9_SPIOL Uncharacterized protein OS=Spinacia oleracea OX=3562 GN=SOVF_156500 PE=4 SV=1
TRINITY_DN854_c2_g1_i6	825	152.46	0	6.8	0	4.69	0	-10.1488	-
TRINITY_DN8262_c0_g2_i5	3551	151.1	0	1.28	0	0.88	0	-10.1393	tr|A0A0K9RKC2|A0A0K9RKC2_SPIOL Carboxypeptidase OS=Spinacia oleracea OX=3562 GN=SOVF_062750 PE=3 SV=1
TRINITY_DN3229_c0_g1_i12	2125	150.13	0	2.21	0	1.52	0	-10.1297	tr|A0A0K9QBU8|A0A0K9QBU8_SPIOL Uncharacterized protein OS=Spinacia oleracea OX=3562 GN=SOVF_196830 PE=4 SV=1
TRINITY_DN11038_c0_g1_i6	2088	148	0	2.22	0	1.53	0	-10.1104	tr|A0A0K9QSD2|A0A0K9QSD2_SPIOL Uncharacterized protein OS=Spinacia oleracea OX=3562 GN=SOVF_153530 PE=3 SV=1
TRINITY_DN624_c1_g1_i14	6959	147.63	0	0.62	0	0.43	0	-10.1104	tr|A0A0K9R509|A0A0K9R509_SPIOL Uncharacterized protein OS=Spinacia oleracea OX=3562 GN=SOVF_111280 PE=4 SV=1
TRINITY_DN6478_c0_g1_i3	1027	146.6	0	4.97	0	3.43	0	-10.1006	tr|A0A0K9RMV8|A0A0K9RMV8_SPIOL Thymidine kinase OS=Spinacia oleracea OX=3562 GN=SOVF_054150 PE=3 SV=1
TRINITY_DN11384_c0_g1_i10	2530	145.59	0	1.77	0	1.22	0	-10.0908	tr|A0A0K9QC56|A0A0K9QC56_SPIOL Uncharacterized protein OS=Spinacia oleracea OX=3562 GN=SOVF_195700 PE=4 SV=1
TRINITY_DN1922_c0_g1_i8	2833	145.92	0	1.57	0	1.09	0	-10.0908	tr|A0A0K9RAT6|A0A0K9RAT6_SPIOL Uncharacterized protein OS=Spinacia oleracea OX=3562 GN=SOVF_092950 PE=4 SV=1
TRINITY_DN2041_c1_g3_i6	2027	146.1	0	2.27	0	1.56	0	-10.0908	tr|A0A0K9QV97|A0A0K9QV97_SPIOL Uncharacterized protein OS=Spinacia oleracea OX=3562 GN=SOVF_137670 PE=4 SV=1
TRINITY_DN2159_c0_g1_i5	4864	145.65	0	0.89	0	0.61	0	-10.0908	tr|A0A0J8BEW5|A0A0J8BEW5_BETVU Uncharacterized protein OS=Beta vulgaris subsp. vulgaris OX=3555 GN=BVRB_1g023260 PE=4 SV=1
TRINITY_DN5384_c0_g1_i4	1659	146.46	0	2.84	0	1.96	0	-10.0908	tr|A0A0K9QJV5|A0A0K9QJV5_SPIOL Uncharacterized protein (Fragment) OS=Spinacia oleracea OX=3562 GN=SOVF_175270 PE=3 SV=1
TRINITY_DN5545_c0_g1_i5	2786	146.18	0	1.61	0	1.11	0	-10.0908	tr|A0A0K9RY42|A0A0K9RY42_SPIOL Uncharacterized protein OS=Spinacia oleracea OX=3562 GN=SOVF_016120 PE=4 SV=1
TRINITY_DN575_c0_g2_i11	2078	145.96	0.29	2.2	0	1.52	0	-10.0908	tr|A0A0K9QER8|A0A0K9QER8_SPIOL Uncharacterized protein OS=Spinacia oleracea OX=3562 GN=SOVF_187170 PE=3 SV=1
TRINITY_DN2314_c0_g2_i4	433	145.28	0	16.65	0	11.48	0	-10.0809	-
TRINITY_DN282_c0_g1_i11	4960	145.41	0.01	0.87	0	0.6	0	-10.0809	tr|A0A0K9RPK8|A0A0K9RPK8_SPIOL Uncharacterized protein OS=Spinacia oleracea OX=3562 GN=SOVF_042990 PE=3 SV=1
TRINITY_DN2127_c0_g1_i19	3742	143.79	0	1.15	0	0.8	0	-10.0709	tr|A0A0K9QTE8|A0A0K9QTE8_SPIOL Uncharacterized protein OS=Spinacia oleracea OX=3562 GN=SOVF_143210 PE=3 SV=1
TRINITY_DN3891_c3_g1_i4	2341	143.77	0	1.9	0	1.31	0	-10.0709	tr|A0A0K9R396|A0A0K9R396_SPIOL Uncharacterized protein OS=Spinacia oleracea OX=3562 GN=SOVF_111630 PE=4 SV=1
TRINITY_DN7223_c0_g1_i5	4720	144.14	0	0.91	0	0.63	0	-10.0709	tr|A0FD17|A0FD17_BETVU NBS-LRR type resistance protein OS=Beta vulgaris OX=161934 PE=2 SV=1
TRINITY_DN10006_c0_g1_i8	1642	142.63	0	2.8	0	1.93	0	-10.0609	-
TRINITY_DN1655_c0_g1_i1	2126	143.39	0	2.11	0	1.45	0	-10.0609	tr|A0A0K9S365|A0A0K9S365_SPIOL Uncharacterized protein OS=Spinacia oleracea OX=3562 GN=SOVF_005670 PE=4 SV=1
TRINITY_DN3099_c0_g1_i8	918	142.98	0	5.57	0	3.84	0	-10.0609	tr|A0A249Y708|A0A249Y708_9CARY TATA-box-binding protein OS=Hylocereus polyrhizus OX=1195597 GN=TBP2 PE=2 SV=1
TRINITY_DN6206_c0_g1_i4	3469	142.55	0	1.24	0	0.85	0	-10.0609	tr|A0A0K9S0M3|A0A0K9S0M3_SPIOL Uncharacterized protein OS=Spinacia oleracea OX=3562 GN=SOVF_013460 PE=4 SV=1
TRINITY_DN6452_c0_g1_i4	3110	142.64	0	1.39	0	0.96	0	-10.0609	tr|A0A0K9RLE9|A0A0K9RLE9_SPIOL Uncharacterized protein OS=Spinacia oleracea OX=3562 GN=SOVF_058010 PE=4 SV=1
TRINITY_DN169_c0_g1_i10	2555	142.27	0	1.71	0	1.18	0	-10.0507	tr|A0A0K9RR19|A0A0K9RR19_SPIOL Uncharacterized protein OS=Spinacia oleracea OX=3562 GN=SOVF_039000 PE=4 SV=1
TRINITY_DN3968_c0_g1_i2	2741	142.26	0	1.59	0	1.1	0	-10.0507	tr|A0A0K9RXM2|A0A0K9RXM2_SPIOL Uncharacterized protein OS=Spinacia oleracea OX=3562 GN=SOVF_016970 PE=4 SV=1
TRINITY_DN1686_c0_g1_i1	3900	141.13	0	1.09	0	0.75	0	-10.0405	tr|A0A0K9QNA6|A0A0K9QNA6_SPIOL Uncharacterized protein OS=Spinacia oleracea OX=3562 GN=SOVF_159960 PE=4 SV=1
TRINITY_DN1793_c0_g1_i6	3147	140.75	0	1.36	0	0.94	0	-10.0405	tr|A0A0J8B4Z4|A0A0J8B4Z4_BETVU Uncharacterized protein OS=Beta vulgaris subsp. vulgaris OX=3555 GN=BVRB_013890 PE=4 SV=1
TRINITY_DN4406_c1_g1_i15	2217	140.6	0	1.98	0	1.36	0	-10.0405	tr|A0A0K9R5B2|A0A0K9R5B2_SPIOL Uncharacterized protein OS=Spinacia oleracea OX=3562 GN=SOVF_104450 PE=4 SV=1
TRINITY_DN2302_c0_g1_i9	3080	139.67	0.18	1.38	0	0.95	0	-10.0303	tr|A0A0K9RDR4|A0A0K9RDR4_SPIOL Uncharacterized protein OS=Spinacia oleracea OX=3562 GN=SOVF_077690 PE=4 SV=1
TRINITY_DN2980_c0_g1_i2	563	139.9	0	10.55	0	7.27	0	-10.0303	-
TRINITY_DN20372_c0_g1_i1	961	139	0	5.11	0	3.52	0	-10.02	-
TRINITY_DN2309_c1_g2_i4	5275	139.04	0	0.78	0	0.54	0	-10.02	tr|A0A0K9RPJ8|A0A0K9RPJ8_SPIOL Uncharacterized protein OS=Spinacia oleracea OX=3562 GN=SOVF_049410 PE=4 SV=1
TRINITY_DN591_c1_g1_i4	2162	138.6	0.02	2	0	1.38	0	-10.02	tr|A0A0K9RW52|A0A0K9RW52_SPIOL Uncharacterized protein OS=Spinacia oleracea OX=3562 GN=SOVF_027680 PE=4 SV=1
TRINITY_DN1846_c0_g1_i3	2359	137.66	0	1.81	0	1.25	0	-10.0096	tr|A0A0K9R6X4|A0A0K9R6X4_SPIOL Probable magnesium transporter OS=Spinacia oleracea OX=3562 GN=SOVF_104480 PE=3 SV=1
TRINITY_DN2821_c0_g1_i3	836	137.96	0	6.05	0	4.17	0	-10.0096	-
TRINITY_DN7065_c0_g1_i4	5632	138.36	0	0.73	0	0.5	0	-10.0096	tr|A0A0K9QWM4|A0A0K9QWM4_SPIOL Uncharacterized protein OS=Spinacia oleracea OX=3562 GN=SOVF_133110 PE=4 SV=1
TRINITY_DN8767_c0_g1_i27	5234	138.06	0	0.78	0	0.54	0	-10.0096	tr|A0A0K9RCH8|A0A0K9RCH8_SPIOL Uncharacterized protein OS=Spinacia oleracea OX=3562 GN=SOVF_088190 PE=4 SV=1
TRINITY_DN2349_c0_g2_i11	4135	137.23	0	0.99	0	0.68	0	-9.99907	tr|A0A0K9RQT7|A0A0K9RQT7_SPIOL Uncharacterized protein OS=Spinacia oleracea OX=3562 GN=SOVF_039520 PE=4 SV=1
TRINITY_DN3016_c0_g1_i9	2149	137.31	0	2	0	1.38	0	-9.99907	tr|Q8LL67|Q8LL67_AMAHP Polyamine oxidase OS=Amaranthus hypochondriacus OX=28502 PE=2 SV=1
TRINITY_DN7346_c0_g1_i3	2017	136.87	0	2.13	0	1.47	0	-9.99907	tr|A0A0K9QAB9|A0A0K9QAB9_SPIOL Uncharacterized protein OS=Spinacia oleracea OX=3562 GN=SOVF_201810 PE=3 SV=1
TRINITY_DN17976_c0_g1_i3	1602	135.51	0.02	2.73	0	1.88	0	-9.98851	tr|A0A0K9RAQ2|A0A0K9RAQ2_SPIOL CASP-like protein OS=Spinacia oleracea OX=3562 GN=SOVF_092450 PE=3 SV=1
TRINITY_DN3933_c0_g1_i5	2712	135.7	0	1.53	0	1.06	0	-9.98851	tr|A0A0K9Q7I6|A0A0K9Q7I6_SPIOL Uncharacterized protein OS=Spinacia oleracea OX=3562 GN=SOVF_216880 PE=3 SV=1
TRINITY_DN4241_c0_g2_i2	4887	135.99	0	0.83	0	0.57	0	-9.98851	tr|A0A0K9R226|A0A0K9R226_SPIOL Uncharacterized protein OS=Spinacia oleracea OX=3562 GN=SOVF_115440 PE=3 SV=1
TRINITY_DN10826_c0_g2_i4	1958	135.17	0	2.18	0	1.5	0	-9.97787	tr|A0A0K9RRF4|A0A0K9RRF4_SPIOL Uncharacterized protein OS=Spinacia oleracea OX=3562 GN=SOVF_037470 PE=4 SV=1
TRINITY_DN1239_c0_g1_i8	5722	134.77	0	0.7	0	0.48	0	-9.97787	tr|A0A0K9R4K2|A0A0K9R4K2_SPIOL Uncharacterized protein OS=Spinacia oleracea OX=3562 GN=SOVF_113940 PE=4 SV=1
TRINITY_DN1426_c0_g1_i5	3981	135.12	0	1.02	0	0.7	0	-9.97787	tr|A0A0K9QUV2|A0A0K9QUV2_SPIOL Uncharacterized protein OS=Spinacia oleracea OX=3562 GN=SOVF_138960 PE=3 SV=1
TRINITY_DN4912_c0_g1_i2	3930	135.32	0	1.03	0	0.71	0	-9.97787	tr|A0A0K9RE20|A0A0K9RE20_SPIOL Uncharacterized protein OS=Spinacia oleracea OX=3562 GN=SOVF_083260 PE=4 SV=1
TRINITY_DN515_c0_g1_i11	2141	135.14	0	1.97	0	1.36	0	-9.97787	tr|A0A0K9QH90|A0A0K9QH90_SPIOL Uncharacterized protein OS=Spinacia oleracea OX=3562 GN=SOVF_185340 PE=4 SV=1
TRINITY_DN744_c0_g1_i6	2256	135.44	0.19	1.87	0	1.29	0	-9.97787	tr|A0A0K9QZE6|A0A0K9QZE6_SPIOL Uncharacterized protein OS=Spinacia oleracea OX=3562 GN=SOVF_129140 PE=3 SV=1
TRINITY_DN3328_c0_g1_i5	378	133.88	0	19.61	0	13.52	0	-9.96716	-
TRINITY_DN4069_c0_g1_i1	3387	133.38	0	1.19	0	0.82	0	-9.95636	tr|A0A0K9QRR2|A0A0K9QRR2_SPIOL Uncharacterized protein OS=Spinacia oleracea OX=3562 GN=SOVF_148520 PE=4 SV=1
TRINITY_DN1856_c0_g1_i2	1057	132.02	0	4.32	0	2.98	0	-9.94549	tr|A0A0K9QPD7|A0A0K9QPD7_SPIOL V-type proton ATPase proteolipid subunit OS=Spinacia oleracea OX=3562 GN=SOVF_162570 PE=3 SV=1
TRINITY_DN1993_c1_g1_i1	631	131.91	0	8.43	0	5.81	0	-9.94549	-
TRINITY_DN2911_c0_g1_i4	9053	130.61	0	0.42	0	0.29	0	-9.93453	tr|A0A0K9QW25|A0A0K9QW25_SPIOL Uncharacterized protein OS=Spinacia oleracea OX=3562 GN=SOVF_135030 PE=4 SV=1
TRINITY_DN3022_c0_g1_i3	1997	130.65	0	2.06	0	1.42	0	-9.93453	tr|A0A0K9QKC8|A0A0K9QKC8_SPIOL Uncharacterized protein OS=Spinacia oleracea OX=3562 GN=SOVF_169480 PE=4 SV=1
TRINITY_DN15565_c0_g1_i3	3145	130.34	0	1.26	0	0.87	0	-9.92348	tr|A0A0K9RG63|A0A0K9RG63_SPIOL Uncharacterized protein OS=Spinacia oleracea OX=3562 GN=SOVF_070380 PE=4 SV=1
TRINITY_DN3016_c0_g1_i8	1564	130.38	0	2.7	0	1.86	0	-9.92348	tr|Q8LL67|Q8LL67_AMAHP Polyamine oxidase OS=Amaranthus hypochondriacus OX=28502 PE=2 SV=1
TRINITY_DN3143_c0_g1_i2	5959	130.06	0	0.64	0	0.44	0	-9.92348	tr|A0A0K9RT42|A0A0K9RT42_SPIOL Uncharacterized protein OS=Spinacia oleracea OX=3562 GN=SOVF_031780 PE=4 SV=1
TRINITY_DN3960_c1_g1_i14	1647	130.09	0	2.54	0	1.75	0	-9.92348	tr|A0A0J8B8J8|A0A0J8B8J8_BETVU Uncharacterized protein OS=Beta vulgaris subsp. vulgaris OX=3555 GN=BVRB_5g125590 PE=4 SV=1
TRINITY_DN64_c0_g2_i1	3260	129.87	0.02	1.21	0	0.83	0	-9.92348	tr|A0A0K9QYB0|A0A0K9QYB0_SPIOL Uncharacterized protein OS=Spinacia oleracea OX=3562 GN=SOVF_127540 PE=4 SV=1
TRINITY_DN1319_c1_g1_i13	4932	129.26	0	0.78	0	0.54	0	-9.91235	tr|A0A0K9QEZ4|A0A0K9QEZ4_SPIOL Uncharacterized protein OS=Spinacia oleracea OX=3562 GN=SOVF_191620 PE=4 SV=1
TRINITY_DN3659_c0_g1_i1	3260	129.36	0	1.2	0	0.83	0	-9.91235	tr|A0A0K9QCX7|A0A0K9QCX7_SPIOL Uncharacterized protein OS=Spinacia oleracea OX=3562 GN=SOVF_200160 PE=4 SV=1
TRINITY_DN380_c1_g1_i7	4604	129.13	0.01	0.83	0	0.58	0	-9.91235	tr|A0A0K9Q9U9|A0A0K9Q9U9_SPIOL Potassium transporter OS=Spinacia oleracea OX=3562 GN=SOVF_203260 PE=3 SV=1
TRINITY_DN1416_c1_g1_i1	1059	6783.98	6.39	221.53	0.22	152.75	0.14	-9.90711	tr|A0A0K9RWP9|A0A0K9RWP9_SPIOL Uncharacterized protein OS=Spinacia oleracea OX=3562 GN=SOVF_020320 PE=4 SV=1
TRINITY_DN2459_c0_g1_i14	4290	128.3	0	0.89	0	0.62	0	-9.90114	tr|A0A0K9RXW5|A0A0K9RXW5_SPIOL Uncharacterized protein OS=Spinacia oleracea OX=3562 GN=SOVF_017040 PE=3 SV=1
TRINITY_DN4068_c0_g1_i8	6377	127.9	0	0.59	0	0.41	0	-9.90114	tr|A0A0K9QSV4|A0A0K9QSV4_SPIOL Uncharacterized protein OS=Spinacia oleracea OX=3562 GN=SOVF_145400 PE=4 SV=1
TRINITY_DN4727_c0_g1_i1	2768	127.65	0	1.41	0	0.97	0	-9.90114	tr|A0A0K9RHK7|A0A0K9RHK7_SPIOL Uncharacterized protein OS=Spinacia oleracea OX=3562 GN=SOVF_065790 PE=4 SV=1
TRINITY_DN721_c0_g1_i19	1987	128.05	0	2.03	0	1.4	0	-9.90114	tr|A0A0K9RI38|A0A0K9RI38_SPIOL Uncharacterized protein OS=Spinacia oleracea OX=3562 GN=SOVF_064090 PE=4 SV=1
TRINITY_DN8120_c0_g1_i4	3360	127.62	0	1.15	0	0.79	0	-9.90114	tr|A0A0K9R529|A0A0K9R529_SPIOL Uncharacterized protein OS=Spinacia oleracea OX=3562 GN=SOVF_106020 PE=4 SV=1
TRINITY_DN190_c0_g1_i19	3470	126.75	0	1.1	0	0.76	0	-9.88983	tr|A0A0K9REJ8|A0A0K9REJ8_SPIOL Uncharacterized protein (Fragment) OS=Spinacia oleracea OX=3562 GN=SOVF_080420 PE=3 SV=1
TRINITY_DN3146_c0_g1_i5	1345	126.92	0	3.12	0	2.15	0	-9.88983	tr|A0A1B1RVA0|A0A1B1RVA0_AMATR Transcription factor MYB1 OS=Amaranthus tricolor OX=29722 PE=2 SV=1
TRINITY_DN406_c0_g1_i4	5285	126.74	0	0.71	0	0.49	0	-9.88983	tr|A0FD18|A0FD18_BETVU NBS-LRR type resistance protein OS=Beta vulgaris OX=161934 PE=2 SV=1
TRINITY_DN1127_c1_g1_i8	3067	126.15	0	1.25	0	0.86	0	-9.87844	tr|A0A0K9RXA6|A0A0K9RXA6_SPIOL Uncharacterized protein OS=Spinacia oleracea OX=3562 GN=SOVF_018970 PE=4 SV=1
TRINITY_DN7977_c0_g1_i9	901	125.79	0	5.01	0	3.46	0	-9.87844	tr|A0A0E3TFF5|A0A0E3TFF5_FAGTA LOL1 OS=Fagopyrum tataricum OX=62330 PE=2 SV=1
TRINITY_DN977_c0_g1_i2	711	126.01	0	6.83	0	4.71	0	-9.87844	tr|A0A0K9RXK4|A0A0K9RXK4_SPIOL Uncharacterized protein OS=Spinacia oleracea OX=3562 GN=SOVF_017180 PE=4 SV=1
TRINITY_DN11312_c0_g2_i13	1967	124.87	0	2	0	1.38	0	-9.86696	tr|A0A0K9RD86|A0A0K9RD86_SPIOL Uncharacterized protein OS=Spinacia oleracea OX=3562 GN=SOVF_079430 PE=4 SV=1
TRINITY_DN1143_c0_g2_i4	2226	124.83	0	1.75	0	1.2	0	-9.86696	tr|A0A0K9QRV4|A0A0K9QRV4_SPIOL S-acyltransferase OS=Spinacia oleracea OX=3562 GN=SOVF_148180 PE=3 SV=1
TRINITY_DN1257_c0_g4_i5	3022	124.6	0.07	1.25	0	0.86	0	-9.86696	tr|A0A0K9R751|A0A0K9R751_SPIOL Uncharacterized protein OS=Spinacia oleracea OX=3562 GN=SOVF_099190 PE=4 SV=1
TRINITY_DN3891_c3_g1_i17	3859	124.98	0	0.97	0	0.67	0	-9.86696	tr|A0A0K9R396|A0A0K9R396_SPIOL Uncharacterized protein OS=Spinacia oleracea OX=3562 GN=SOVF_111630 PE=4 SV=1
TRINITY_DN5208_c0_g1_i1	1505	124.85	0	2.7	0	1.86	0	-9.86696	-
TRINITY_DN5656_c0_g1_i2	3609	125.26	0	1.05	0	0.72	0	-9.86696	tr|A0A0K9RR58|A0A0K9RR58_SPIOL Uncharacterized protein OS=Spinacia oleracea OX=3562 GN=SOVF_037910 PE=4 SV=1
TRINITY_DN1603_c0_g1_i2	2906	123.63	0	1.3	0	0.89	0	-9.85538	tr|A0A0K9RB35|A0A0K9RB35_SPIOL Uncharacterized protein OS=Spinacia oleracea OX=3562 GN=SOVF_091100 PE=4 SV=1
TRINITY_DN2660_c0_g2_i8	3113	123.99	0	1.21	0	0.83	0	-9.85538	tr|A0A0K9QRM2|A0A0K9QRM2_SPIOL Uncharacterized protein OS=Spinacia oleracea OX=3562 GN=SOVF_156170 PE=4 SV=1
TRINITY_DN3960_c1_g1_i5	1783	124.09	0	2.22	0	1.53	0	-9.85538	tr|A0A0J8B8J8|A0A0J8B8J8_BETVU Uncharacterized protein OS=Beta vulgaris subsp. vulgaris OX=3555 GN=BVRB_5g125590 PE=4 SV=1
TRINITY_DN1487_c0_g2_i3	4410	123.45	0	0.83	0	0.58	0	-9.84371	tr|A0A0K9RFV2|A0A0K9RFV2_SPIOL Uncharacterized protein OS=Spinacia oleracea OX=3562 GN=SOVF_071440 PE=4 SV=1
TRINITY_DN7748_c1_g4_i19	3044	123.37	0	1.23	0	0.85	0	-9.84371	tr|A0A0K9QQ93|A0A0K9QQ93_SPIOL Uncharacterized protein OS=Spinacia oleracea OX=3562 GN=SOVF_160440 PE=3 SV=1
TRINITY_DN1143_c0_g2_i8	1485	121.82	0	2.68	0	1.84	0	-9.83195	tr|A0A0K9QRV4|A0A0K9QRV4_SPIOL S-acyltransferase OS=Spinacia oleracea OX=3562 GN=SOVF_148180 PE=3 SV=1
TRINITY_DN1186_c0_g1_i3	4406	121.76	0	0.82	0	0.57	0	-9.83195	tr|A0A0K9R270|A0A0K9R270_SPIOL Uncharacterized protein OS=Spinacia oleracea OX=3562 GN=SOVF_122050 PE=4 SV=1
TRINITY_DN13884_c0_g1_i3	1816	121.82	0.03	2.13	0	1.47	0	-9.83195	tr|A0A0K9RLR8|A0A0K9RLR8_SPIOL Uncharacterized protein OS=Spinacia oleracea OX=3562 GN=SOVF_057520 PE=4 SV=1
TRINITY_DN4681_c0_g2_i12	1699	122.28	0	2.31	0	1.59	0	-9.83195	tr|A0A0K9RRN1|A0A0K9RRN1_SPIOL Uncharacterized protein OS=Spinacia oleracea OX=3562 GN=SOVF_041940 PE=4 SV=1
TRINITY_DN8187_c0_g3_i4	2262	121.8	0.01	1.67	0	1.15	0	-9.83195	tr|A0A0K9RS91|A0A0K9RS91_SPIOL Purple acid phosphatase OS=Spinacia oleracea OX=3562 GN=SOVF_041180 PE=3 SV=1
TRINITY_DN1641_c0_g1_i9	1211	121.42	0	3.38	0	2.33	0	-9.82009	-
TRINITY_DN2840_c1_g1_i1	1458	120.79	0	2.71	0	1.87	0	-9.82009	tr|A0A0K9Q9F6|A0A0K9Q9F6_SPIOL Uncharacterized protein OS=Spinacia oleracea OX=3562 GN=SOVF_212150 PE=3 SV=1
TRINITY_DN3330_c0_g1_i12	1475	120.75	0	2.67	0	1.84	0	-9.82009	-
TRINITY_DN10970_c0_g1_i32	3545	119.71	0	1.02	0	0.7	0	-9.80813	tr|A0A0K9RC04|A0A0K9RC04_SPIOL Uncharacterized protein OS=Spinacia oleracea OX=3562 GN=SOVF_090050 PE=4 SV=1
TRINITY_DN1530_c0_g2_i3	1802	120.22	0	2.12	0	1.46	0	-9.80813	-
TRINITY_DN1588_c0_g1_i9	3771	120.44	0.03	0.96	0	0.66	0	-9.80813	tr|A0A0J8CDU5|A0A0J8CDU5_BETVU Uncharacterized protein OS=Beta vulgaris subsp. vulgaris OX=3555 GN=BVRB_5g105680 PE=4 SV=1
TRINITY_DN279_c1_g1_i21	2648	120.48	0	1.4	0	0.96	0	-9.80813	tr|A0A0K9RZZ0|A0A0K9RZZ0_SPIOL Uncharacterized protein OS=Spinacia oleracea OX=3562 GN=SOVF_009900 PE=3 SV=1
TRINITY_DN5181_c0_g1_i7	4243	119.62	0	0.84	0	0.58	0	-9.80813	tr|A0A0K9QUM9|A0A0K9QUM9_SPIOL Uncharacterized protein OS=Spinacia oleracea OX=3562 GN=SOVF_146730 PE=4 SV=1
TRINITY_DN779_c0_g1_i7	3677	119.56	0	0.98	0	0.67	0	-9.80813	-
TRINITY_DN4332_c0_g1_i4	4024	119.35	0	0.89	0	0.61	0	-9.79607	tr|A0A0K9S030|A0A0K9S030_SPIOL Uncharacterized protein OS=Spinacia oleracea OX=3562 GN=SOVF_009830 PE=4 SV=1
TRINITY_DN4338_c0_g1_i4	2388	119.15	0	1.54	0	1.07	0	-9.79607	tr|A0A0J8BD38|A0A0J8BD38_BETVU Nuclear/nucleolar GTPase 2 OS=Beta vulgaris subsp. vulgaris OX=3555 GN=BVRB_4g097000 PE=3 SV=1
TRINITY_DN751_c0_g3_i5	3595	119.34	0	1	0	0.69	0	-9.79607	tr|A0A0K9QNY4|A0A0K9QNY4_SPIOL Uncharacterized protein OS=Spinacia oleracea OX=3562 GN=SOVF_157790 PE=4 SV=1
TRINITY_DN190_c0_g1_i18	3558	117.58	0	1	0	0.69	0	-9.78391	tr|A0A0K9REJ8|A0A0K9REJ8_SPIOL Uncharacterized protein (Fragment) OS=Spinacia oleracea OX=3562 GN=SOVF_080420 PE=3 SV=1
TRINITY_DN2709_c0_g1_i17	3652	117.8	0	0.97	0	0.67	0	-9.78391	tr|A0A0K9RQV9|A0A0K9RQV9_SPIOL Uncharacterized protein OS=Spinacia oleracea OX=3562 GN=SOVF_045360 PE=4 SV=1
TRINITY_DN447_c0_g1_i6	2385	118.19	0	1.53	0	1.06	0	-9.78391	tr|A0A0J8FJ42|A0A0J8FJ42_BETVU Uncharacterized protein OS=Beta vulgaris subsp. vulgaris OX=3555 GN=BVRB_3g055930 PE=4 SV=1
TRINITY_DN722_c1_g1_i4	407	117.52	0	15.02	0	10.35	0	-9.78391	-
TRINITY_DN1465_c0_g1_i7	1654	117.38	0.22	2.28	0	1.57	0	-9.77164	tr|A0A0K9RP05|A0A0K9RP05_SPIOL Uncharacterized protein OS=Spinacia oleracea OX=3562 GN=SOVF_044390 PE=3 SV=1
TRINITY_DN1991_c0_g1_i5	3230	116.9	0	1.1	0	0.76	0	-9.77164	tr|A0A0K9S0D8|A0A0K9S0D8_SPIOL Uncharacterized protein OS=Spinacia oleracea OX=3562 GN=SOVF_008500 PE=4 SV=1
TRINITY_DN7624_c0_g1_i8	2947	116.54	0	1.21	0	0.83	0	-9.77164	tr|A0A0K9QSW1|A0A0K9QSW1_SPIOL Uncharacterized protein OS=Spinacia oleracea OX=3562 GN=SOVF_145120 PE=4 SV=1
TRINITY_DN11037_c0_g1_i17	2590	116.07	0	1.38	0	0.95	0	-9.75927	tr|J3SDF5|J3SDF5_BETVU Ty3/gypsy retrotransposon protein OS=Beta vulgaris subsp. vulgaris OX=3555 PE=4 SV=1
TRINITY_DN2076_c0_g1_i12	2998	116.14	0	1.18	0	0.81	0	-9.75927	tr|A0A0K9R2X2|A0A0K9R2X2_SPIOL RING-type E3 ubiquitin transferase OS=Spinacia oleracea OX=3562 GN=SOVF_112210 PE=4 SV=1
TRINITY_DN2270_c0_g1_i7	2972	116.29	0	1.19	0	0.82	0	-9.75927	tr|A0A0K9Q8N2|A0A0K9Q8N2_SPIOL V-type proton ATPase subunit G OS=Spinacia oleracea OX=3562 GN=SOVF_207450 PE=3 SV=1
TRINITY_DN2905_c0_g1_i4	3657	115.61	0	0.95	0	0.66	0	-9.75927	tr|A0A0K9RS78|A0A0K9RS78_SPIOL Uncharacterized protein OS=Spinacia oleracea OX=3562 GN=SOVF_041380 PE=4 SV=1
TRINITY_DN23121_c0_g1_i10	1973	114.55	0	1.83	0	1.26	0	-9.7468	tr|A0A1B1SHT3|A0A1B1SHT3_9CARY NAC4 OS=Haloxylon ammodendron OX=151230 PE=2 SV=1
TRINITY_DN348_c0_g1_i2	2810	114.69	0.01	1.25	0	0.86	0	-9.7468	tr|A0A0K9QTP8|A0A0K9QTP8_SPIOL Uncharacterized protein (Fragment) OS=Spinacia oleracea OX=3562 GN=SOVF_142570 PE=4 SV=1
TRINITY_DN3882_c0_g2_i4	3159	114.64	0	1.1	0	0.76	0	-9.7468	tr|A0A0K9RZA1|A0A0K9RZA1_SPIOL Uncharacterized protein OS=Spinacia oleracea OX=3562 GN=SOVF_011930 PE=4 SV=1
TRINITY_DN537_c0_g1_i5	9882	115.1	0	0.34	0	0.23	0	-9.7468	tr|A0A0K9RZQ8|A0A0K9RZQ8_SPIOL Uncharacterized protein OS=Spinacia oleracea OX=3562 GN=SOVF_010650 PE=4 SV=1
TRINITY_DN7712_c0_g1_i3	655	115.37	0	7	0	4.83	0	-9.7468	-
TRINITY_DN101_c0_g1_i6	4340	113.98	0	0.78	0	0.54	0	-9.73421	tr|A0A0K9R319|A0A0K9R319_SPIOL Uncharacterized protein (Fragment) OS=Spinacia oleracea OX=3562 GN=SOVF_119030 PE=4 SV=1
TRINITY_DN1287_c0_g1_i1	1858	113	0	1.93	0	1.33	0	-9.72152	-
TRINITY_DN1836_c0_g1_i6	2493	113.28	0	1.4	0	0.97	0	-9.72152	tr|A0A0K9QK07|A0A0K9QK07_SPIOL Uncharacterized protein OS=Spinacia oleracea OX=3562 GN=SOVF_170520 PE=4 SV=1
TRINITY_DN1982_c1_g1_i4	3924	113.03	0	0.86	0	0.6	0	-9.72152	tr|A0A0K9QK14|A0A0K9QK14_SPIOL Uncharacterized protein (Fragment) OS=Spinacia oleracea OX=3562 GN=SOVF_176610 PE=4 SV=1
TRINITY_DN262_c1_g1_i11	3133	112.53	0	1.09	0	0.75	0	-9.72152	tr|A0A0K9R240|A0A0K9R240_SPIOL Uncharacterized protein OS=Spinacia oleracea OX=3562 GN=SOVF_120700 PE=4 SV=1
TRINITY_DN364_c0_g1_i9	3313	113.06	0	1.03	0	0.71	0	-9.72152	tr|A0A0K9Q7C4|A0A0K9Q7C4_SPIOL Uncharacterized protein OS=Spinacia oleracea OX=3562 GN=SOVF_212350 PE=4 SV=1
TRINITY_DN3900_c0_g1_i5	4269	112.88	0	0.79	0	0.54	0	-9.72152	tr|A0A0K9RKP2|A0A0K9RKP2_SPIOL Uncharacterized protein OS=Spinacia oleracea OX=3562 GN=SOVF_055790 PE=4 SV=1
TRINITY_DN11037_c0_g1_i14	2224	111.99	0	1.57	0	1.08	0	-9.70871	tr|A0A0K9QG76|A0A0K9QG76_SPIOL Uncharacterized protein OS=Spinacia oleracea OX=3562 GN=SOVF_188200 PE=4 SV=1
TRINITY_DN12935_c0_g1_i3	1835	112	0	1.94	0	1.34	0	-9.70871	tr|A0A0K9R1N3|A0A0K9R1N3_SPIOL Uncharacterized protein OS=Spinacia oleracea OX=3562 GN=SOVF_121960 PE=3 SV=1
TRINITY_DN3220_c0_g1_i5	3377	111.74	0	1	0	0.69	0	-9.70871	tr|Q7M1Q9|Q7M1Q9_PHYAM Chitinase A OS=Phytolacca americana OX=3527 PE=4 SV=1
TRINITY_DN3986_c1_g2_i1	8792	111.82	0	0.37	0	0.26	0	-9.70871	tr|A0A0K9RAY1|A0A0K9RAY1_SPIOL Uncharacterized protein OS=Spinacia oleracea OX=3562 GN=SOVF_087010 PE=4 SV=1
TRINITY_DN879_c0_g1_i11	3179	112.24	0.18	1.07	0	0.74	0	-9.70871	tr|A0A0K9RL89|A0A0K9RL89_SPIOL Uncharacterized protein OS=Spinacia oleracea OX=3562 GN=SOVF_059440 PE=4 SV=1
TRINITY_DN101_c0_g1_i9	4262	111.12	0	0.78	0	0.54	0	-9.69578	tr|A0A0K9R319|A0A0K9R319_SPIOL Uncharacterized protein (Fragment) OS=Spinacia oleracea OX=3562 GN=SOVF_119030 PE=4 SV=1
TRINITY_DN10393_c0_g1_i17	1177	110.54	0	3.18	0	2.19	0	-9.69578	tr|Q711H9|Q711H9_BETVU Soluble pyrophosphatase OS=Beta vulgaris OX=161934 GN=ppa1 PE=2 SV=1
TRINITY_DN2703_c0_g1_i7	3530	111.34	0	0.95	0	0.66	0	-9.69578	tr|A0A0K9R134|A0A0K9R134_SPIOL Uncharacterized protein OS=Spinacia oleracea OX=3562 GN=SOVF_118760 PE=4 SV=1
TRINITY_DN9008_c0_g1_i9	2963	110.93	0.22	1.14	0	0.79	0	-9.69578	tr|A0A0K9QN19|A0A0K9QN19_SPIOL Uncharacterized protein OS=Spinacia oleracea OX=3562 GN=SOVF_165740 PE=4 SV=1
TRINITY_DN992_c0_g1_i7	3706	111	0	0.9	0	0.62	0	-9.69578	tr|A0A0K9RFZ9|A0A0K9RFZ9_SPIOL Uncharacterized protein OS=Spinacia oleracea OX=3562 GN=SOVF_077130 PE=3 SV=1
TRINITY_DN2414_c0_g1_i8	1650	109.7	0	2.14	0	1.47	0	-9.68274	tr|A0A0K9R958|A0A0K9R958_SPIOL Uncharacterized protein OS=Spinacia oleracea OX=3562 GN=SOVF_097610 PE=4 SV=1
TRINITY_DN2458_c0_g2_i5	3896	109.95	0	0.85	0	0.58	0	-9.68274	tr|A0A0K9QF86|A0A0K9QF86_SPIOL Uncharacterized protein OS=Spinacia oleracea OX=3562 GN=SOVF_192510 PE=3 SV=1
TRINITY_DN2524_c0_g3_i1	841	110	0	4.78	0	3.3	0	-9.68274	tr|A0A0K9QWC7|A0A0K9QWC7_SPIOL Uncharacterized protein OS=Spinacia oleracea OX=3562 GN=SOVF_139130 PE=4 SV=1
TRINITY_DN3385_c0_g1_i18	3597	109.55	0	0.92	0	0.63	0	-9.68274	tr|A0A0K9RVV1|A0A0K9RVV1_SPIOL Phospholipase D OS=Spinacia oleracea OX=3562 GN=SOVF_023060 PE=3 SV=1
TRINITY_DN6434_c1_g2_i4	3648	109.66	0	0.9	0	0.62	0	-9.68274	tr|A0A0K9Q8R1|A0A0K9Q8R1_SPIOL Aldehyde dehydrogenase OS=Spinacia oleracea OX=3562 GN=SOVF_212440 PE=3 SV=1
TRINITY_DN8454_c0_g1_i7	2945	109.85	0	1.14	0	0.78	0	-9.68274	tr|A0A0K9QFR6|A0A0K9QFR6_SPIOL Uncharacterized protein OS=Spinacia oleracea OX=3562 GN=SOVF_190640 PE=4 SV=1
TRINITY_DN8621_c0_g1_i8	3118	109.89	0	1.07	0	0.74	0	-9.68274	tr|A0A0K9RII3|A0A0K9RII3_SPIOL Uncharacterized protein OS=Spinacia oleracea OX=3562 GN=SOVF_062780 PE=4 SV=1
TRINITY_DN22670_c0_g1_i1	1110	109	0	3.36	0	2.32	0	-9.66958	tr|A0A0K9QED6|A0A0K9QED6_SPIOL Uncharacterized protein OS=Spinacia oleracea OX=3562 GN=SOVF_193840 PE=4 SV=1
TRINITY_DN2391_c0_g2_i6	2380	108.87	0.04	1.42	0	0.98	0	-9.66958	tr|A0A0K9QPN1|A0A0K9QPN1_SPIOL Uncharacterized protein OS=Spinacia oleracea OX=3562 GN=SOVF_155570 PE=4 SV=1
TRINITY_DN2930_c0_g1_i13	2743	109.01	0	1.22	0	0.84	0	-9.66958	tr|A0A0K9RCW9|A0A0K9RCW9_SPIOL Inositol-pentakisphosphate 2-kinase OS=Spinacia oleracea OX=3562 GN=SOVF_080660 PE=4 SV=1
TRINITY_DN3229_c0_g1_i3	2237	109.47	0	1.52	0	1.05	0	-9.66958	tr|A0A0K9QBU8|A0A0K9QBU8_SPIOL Uncharacterized protein OS=Spinacia oleracea OX=3562 GN=SOVF_196830 PE=4 SV=1
TRINITY_DN4975_c0_g1_i5	2359	108.58	0	1.43	0	0.98	0	-9.66958	tr|A0A0K9QBY2|A0A0K9QBY2_SPIOL Uncharacterized protein OS=Spinacia oleracea OX=3562 GN=SOVF_203290 PE=4 SV=1
TRINITY_DN16360_c0_g1_i6	3766	108.37	0	0.86	0	0.6	0	-9.6563	tr|A0A0K9R942|A0A0K9R942_SPIOL Uncharacterized protein OS=Spinacia oleracea OX=3562 GN=SOVF_097740 PE=4 SV=1
TRINITY_DN1716_c0_g2_i3	2425	107.72	0	1.37	0	0.95	0	-9.6563	tr|A0A0K9R2S5|A0A0K9R2S5_SPIOL Uncharacterized protein OS=Spinacia oleracea OX=3562 GN=SOVF_113260 PE=4 SV=1
TRINITY_DN2521_c0_g1_i1	3085	108.18	0	1.07	0	0.73	0	-9.6563	tr|A0A0J8B711|A0A0J8B711_BETVU Uncharacterized protein OS=Beta vulgaris subsp. vulgaris OX=3555 GN=BVRB_7g179660 PE=4 SV=1
TRINITY_DN2521_c0_g1_i18	3165	107.97	0	1.03	0	0.71	0	-9.6563	tr|A0A0J8B711|A0A0J8B711_BETVU Uncharacterized protein OS=Beta vulgaris subsp. vulgaris OX=3555 GN=BVRB_7g179660 PE=4 SV=1
TRINITY_DN380_c1_g1_i10	3171	107.91	0	1.03	0	0.71	0	-9.6563	tr|A0A0K9Q9U9|A0A0K9Q9U9_SPIOL Potassium transporter OS=Spinacia oleracea OX=3562 GN=SOVF_203260 PE=3 SV=1
TRINITY_DN4045_c0_g1_i27	3253	108.29	0	1.01	0	0.7	0	-9.6563	tr|A0A0K9QF16|A0A0K9QF16_SPIOL Uncharacterized protein OS=Spinacia oleracea OX=3562 GN=SOVF_193410 PE=4 SV=1
TRINITY_DN414_c0_g1_i9	3401	107.83	0	0.96	0	0.66	0	-9.6563	tr|A0A0K9RTB1|A0A0K9RTB1_SPIOL Uncharacterized protein OS=Spinacia oleracea OX=3562 GN=SOVF_032050 PE=4 SV=1
TRINITY_DN557_c0_g1_i5	1508	108.09	0	2.33	0	1.61	0	-9.6563	tr|A0A0K9S277|A0A0K9S277_SPIOL Uncharacterized protein OS=Spinacia oleracea OX=3562 GN=SOVF_008470 PE=4 SV=1
TRINITY_DN7219_c0_g1_i11	3677	106.76	0	0.87	0	0.6	0	-9.6429	tr|A0A0K9RG45|A0A0K9RG45_SPIOL 4-alpha-glucanotransferase OS=Spinacia oleracea OX=3562 GN=SOVF_070490 PE=3 SV=1
TRINITY_DN1260_c0_g1_i24	3320	106.34	0	0.97	0	0.67	0	-9.62937	tr|A0A0K9RME7|A0A0K9RME7_SPIOL Uncharacterized protein OS=Spinacia oleracea OX=3562 GN=SOVF_056110 PE=4 SV=1
TRINITY_DN2310_c0_g1_i6	3506	105.81	0	0.91	0	0.63	0	-9.62937	tr|A0A0K9QJP4|A0A0K9QJP4_SPIOL Protein arginine N-methyltransferase OS=Spinacia oleracea OX=3562 GN=SOVF_177920 PE=3 SV=1
TRINITY_DN3182_c0_g1_i5	2742	106.13	0	1.19	0	0.82	0	-9.62937	tr|A0A0K9RQ39|A0A0K9RQ39_SPIOL Uncharacterized protein OS=Spinacia oleracea OX=3562 GN=SOVF_047160 PE=4 SV=1
TRINITY_DN812_c0_g1_i5	440	105.61	0	11.77	0	8.12	0	-9.62937	tr|A0A0K9R4N7|A0A0K9R4N7_SPIOL Uncharacterized protein (Fragment) OS=Spinacia oleracea OX=3562 GN=SOVF_112370 PE=4 SV=1
TRINITY_DN2201_c0_g1_i26	3481	104.72	0	0.91	0	0.63	0	-9.61571	tr|A0A0K9RN08|A0A0K9RN08_SPIOL Uncharacterized protein OS=Spinacia oleracea OX=3562 GN=SOVF_048480 PE=4 SV=1
TRINITY_DN2247_c1_g1_i1	2389	104.54	0	1.35	0	0.93	0	-9.61571	tr|A0A0K9RTU5|A0A0K9RTU5_SPIOL Uncharacterized protein OS=Spinacia oleracea OX=3562 GN=SOVF_029090 PE=3 SV=1
TRINITY_DN2897_c1_g1_i10	2544	104.67	0	1.27	0	0.87	0	-9.61571	tr|A0A0K9R9K3|A0A0K9R9K3_SPIOL Uncharacterized protein OS=Spinacia oleracea OX=3562 GN=SOVF_091430 PE=4 SV=1
TRINITY_DN4005_c0_g4_i4	1162	105.26	0	3.08	0	2.12	0	-9.61571	-
TRINITY_DN4667_c1_g1_i12	2842	104.83	0	1.13	0	0.78	0	-9.61571	tr|A0A0J8BM06|A0A0J8BM06_BETVU Uncharacterized protein OS=Beta vulgaris subsp. vulgaris OX=3555 GN=BVRB_9g206330 PE=4 SV=1
TRINITY_DN496_c1_g1_i7	3631	105.09	0	0.87	0	0.6	0	-9.61571	tr|A0A0K9RQS5|A0A0K9RQS5_SPIOL Uncharacterized protein OS=Spinacia oleracea OX=3562 GN=SOVF_045700 PE=4 SV=1
TRINITY_DN11278_c0_g1_i11	3298	104.18	0.11	0.96	0	0.66	0	-9.60193	tr|A0A0K9R4X5|A0A0K9R4X5_SPIOL Probable alanine--tRNA ligase, chloroplastic OS=Spinacia oleracea OX=3562 GN=SOVF_106470 PE=3 SV=1
TRINITY_DN1817_c0_g1_i10	2645	103.53	0	1.2	0	0.83	0	-9.60193	tr|A0A0K9S059|A0A0K9S059_SPIOL Uncharacterized protein OS=Spinacia oleracea OX=3562 GN=SOVF_009340 PE=4 SV=1
TRINITY_DN2302_c0_g1_i1	3726	104.46	0	0.84	0	0.58	0	-9.60193	tr|A0A0K9R9J8|A0A0K9R9J8_SPIOL Uncharacterized protein (Fragment) OS=Spinacia oleracea OX=3562 GN=SOVF_091470 PE=3 SV=1
TRINITY_DN26508_c0_g3_i2	4318	103.82	0	0.72	0	0.49	0	-9.60193	tr|A0A0K9RTB2|A0A0K9RTB2_SPIOL Uncharacterized protein OS=Spinacia oleracea OX=3562 GN=SOVF_037390 PE=4 SV=1
TRINITY_DN3565_c0_g2_i4	5901	104.23	0	0.52	0	0.36	0	-9.60193	tr|A0A0J8BBT3|A0A0J8BBT3_BETVU Uncharacterized protein OS=Beta vulgaris subsp. vulgaris OX=3555 GN=BVRB_5g126490 PE=4 SV=1
TRINITY_DN3710_c0_g1_i4	1878	104.03	0	1.75	0	1.21	0	-9.60193	tr|A0A0K9QL29|A0A0K9QL29_SPIOL Uncharacterized protein OS=Spinacia oleracea OX=3562 GN=SOVF_173360 PE=4 SV=1
TRINITY_DN4619_c0_g1_i3	7836	104.02	0	0.39	0	0.27	0	-9.60193	tr|F4NCM1|F4NCM1_BETVU Uncharacterized protein OS=Beta vulgaris subsp. vulgaris OX=3555 PE=4 SV=1
TRINITY_DN5179_c1_g2_i12	3970	103.54	0	0.78	0	0.54	0	-9.60193	tr|A0A0K9RLG8|A0A0K9RLG8_SPIOL Uncharacterized protein OS=Spinacia oleracea OX=3562 GN=SOVF_052820 PE=4 SV=1
TRINITY_DN6423_c0_g1_i4	1402	103.89	0	2.44	0	1.68	0	-9.60193	tr|A0A0J8B7P7|A0A0J8B7P7_BETVU Methionine aminopeptidase OS=Beta vulgaris subsp. vulgaris OX=3555 GN=BVRB_003470 PE=3 SV=1
TRINITY_DN7603_c0_g1_i3	1659	104.29	0	2.02	0	1.39	0	-9.60193	tr|A0A0K9RHF2|A0A0K9RHF2_SPIOL COBRA-like protein OS=Spinacia oleracea OX=3562 GN=SOVF_066190 PE=3 SV=1
TRINITY_DN1641_c0_g1_i2	612	103.16	0	6.89	0	4.75	0	-9.588	-
TRINITY_DN210_c0_g1_i2	1971	103.46	0	1.65	0	1.14	0	-9.588	tr|A0A0K9RDK3|A0A0K9RDK3_SPIOL Pectinesterase OS=Spinacia oleracea OX=3562 GN=SOVF_081810 PE=3 SV=1
TRINITY_DN3293_c0_g1_i10	2758	102.59	0	1.14	0	0.79	0	-9.588	tr|A0A0K9S259|A0A0K9S259_SPIOL Uncharacterized protein OS=Spinacia oleracea OX=3562 GN=SOVF_008590 PE=3 SV=1
TRINITY_DN6116_c0_g5_i1	1220	103	0	2.84	0	1.96	0	-9.588	tr|E7BQD4|E7BQD4_SILLA Gag-pol polyprotein OS=Silene latifolia OX=37657 PE=4 SV=1
TRINITY_DN824_c1_g2_i5	2322	103.04	0	1.38	0	0.95	0	-9.588	tr|A0A0K9RWH7|A0A0K9RWH7_SPIOL Uncharacterized protein OS=Spinacia oleracea OX=3562 GN=SOVF_025800 PE=4 SV=1
TRINITY_DN9088_c0_g1_i1	1535	103	0	2.18	0	1.5	0	-9.588	tr|A0A1B3TNU5|A0A1B3TNU5_MIRJA RNaseH OS=Mirabilis jalapa OX=3538 PE=4 SV=1
TRINITY_DN9634_c0_g1_i3	890	103.38	0	4.18	0	2.88	0	-9.588	tr|A0A0K9RYB1|A0A0K9RYB1_SPIOL Protein disulfide-isomerase OS=Spinacia oleracea OX=3562 GN=SOVF_015020 PE=3 SV=1
TRINITY_DN1157_c1_g1_i10	3096	102.5	0	1.01	0	0.69	0	-9.57395	tr|A0A0K9RI90|A0A0K9RI90_SPIOL Uncharacterized protein OS=Spinacia oleracea OX=3562 GN=SOVF_069020 PE=4 SV=1
TRINITY_DN2031_c0_g1_i11	3644	101.82	0	0.84	0	0.58	0	-9.57395	tr|A0A0K9QSZ1|A0A0K9QSZ1_SPIOL Uncharacterized protein OS=Spinacia oleracea OX=3562 GN=SOVF_144870 PE=4 SV=1
TRINITY_DN2638_c0_g1_i8	1654	101.66	0	1.98	0	1.36	0	-9.57395	tr|A0A0K9QYN4|A0A0K9QYN4_SPIOL Uncharacterized protein OS=Spinacia oleracea OX=3562 GN=SOVF_125920 PE=3 SV=1
TRINITY_DN3194_c0_g1_i3	2748	102.48	0	1.14	0	0.79	0	-9.57395	tr|A0A0K9RPL0|A0A0K9RPL0_SPIOL Uncharacterized protein OS=Spinacia oleracea OX=3562 GN=SOVF_043480 PE=3 SV=1
TRINITY_DN3986_c1_g2_i8	9294	102.05	0	0.32	0	0.22	0	-9.57395	tr|E2DMZ5|E2DMZ5_BETVU Uncharacterized protein OS=Beta vulgaris OX=161934 PE=4 SV=1
TRINITY_DN4139_c0_g1_i3	2447	101.64	0	1.28	0	0.88	0	-9.57395	tr|A0A0K9QU62|A0A0K9QU62_SPIOL Uncharacterized protein OS=Spinacia oleracea OX=3562 GN=SOVF_141090 PE=4 SV=1
TRINITY_DN440_c0_g1_i14	4747	101.91	0.01	0.64	0	0.44	0	-9.57395	tr|A0A0K9QZG8|A0A0K9QZG8_SPIOL Uncharacterized protein OS=Spinacia oleracea OX=3562 GN=SOVF_124130 PE=4 SV=1
TRINITY_DN5849_c0_g2_i2	2927	102.5	0	1.07	0	0.74	0	-9.57395	tr|A0A0K9QV79|A0A0K9QV79_SPIOL Uncharacterized protein OS=Spinacia oleracea OX=3562 GN=SOVF_144030 PE=4 SV=1
TRINITY_DN2014_c0_g1_i9	2466	101.21	0	1.27	0	0.87	0	-9.55975	tr|A0A0J8C0T8|A0A0J8C0T8_BETVU Uncharacterized protein OS=Beta vulgaris subsp. vulgaris OX=3555 GN=BVRB_7g165050 PE=3 SV=1
TRINITY_DN3328_c0_g1_i9	576	100.55	0	7.33	0	5.05	0	-9.55975	-
TRINITY_DN4672_c0_g1_i6	3578	101.13	0	0.85	0	0.59	0	-9.55975	tr|G9FIF2|G9FIF2_BETVU Uncharacterized protein OS=Beta vulgaris OX=161934 PE=4 SV=1
TRINITY_DN6423_c0_g1_i1	2329	101.12	0	1.35	0	0.93	0	-9.55975	tr|A0A0K9QCZ9|A0A0K9QCZ9_SPIOL Methionine aminopeptidase OS=Spinacia oleracea OX=3562 GN=SOVF_192940 PE=3 SV=1
TRINITY_DN774_c0_g1_i5	3723	101.26	0	0.82	0	0.56	0	-9.55975	tr|A0A0K9RY77|A0A0K9RY77_SPIOL Uncharacterized protein OS=Spinacia oleracea OX=3562 GN=SOVF_021290 PE=4 SV=1
TRINITY_DN841_c0_g1_i3	2183	101	0	1.44	0	1	0	-9.55975	tr|A0A0K9QUM2|A0A0K9QUM2_SPIOL Uncharacterized protein OS=Spinacia oleracea OX=3562 GN=SOVF_139440 PE=4 SV=1
TRINITY_DN2904_c0_g1_i5	7227	100.49	0	0.41	0	0.28	0	-9.54542	tr|A0A0K9RDU2|A0A0K9RDU2_SPIOL Uncharacterized protein (Fragment) OS=Spinacia oleracea OX=3562 GN=SOVF_078740 PE=4 SV=1
TRINITY_DN3317_c0_g1_i4	5282	99.92	0.04	0.56	0	0.39	0	-9.54542	tr|A0A0K9QSJ1|A0A0K9QSJ1_SPIOL Uncharacterized protein OS=Spinacia oleracea OX=3562 GN=SOVF_146070 PE=4 SV=1
TRINITY_DN1228_c0_g2_i2	310	99	0	21.85	0	15.06	0	-9.53094	tr|A0A0K9RS76|A0A0K9RS76_SPIOL AP-4 complex subunit epsilon OS=Spinacia oleracea OX=3562 GN=SOVF_034260 PE=3 SV=1
TRINITY_DN1718_c0_g1_i17	2036	99.17	0.15	1.53	0	1.06	0	-9.53094	tr|A0A0J8B3X6|A0A0J8B3X6_BETVU Uncharacterized protein OS=Beta vulgaris subsp. vulgaris OX=3555 GN=BVRB_003990 PE=3 SV=1
TRINITY_DN2654_c0_g1_i1	2555	99.18	0	1.2	0	0.82	0	-9.53094	tr|A0A0K9Q9V6|A0A0K9Q9V6_SPIOL Uncharacterized protein OS=Spinacia oleracea OX=3562 GN=SOVF_203380 PE=4 SV=1
TRINITY_DN3777_c0_g1_i3	5215	99.19	0	0.56	0	0.39	0	-9.53094	tr|A0A0K9QR35|A0A0K9QR35_SPIOL Uncharacterized protein OS=Spinacia oleracea OX=3562 GN=SOVF_150600 PE=4 SV=1
TRINITY_DN4815_c0_g1_i5	3318	99.3	0.04	0.91	0	0.62	0	-9.53094	tr|A0A0K9RUJ2|A0A0K9RUJ2_SPIOL Uncharacterized protein OS=Spinacia oleracea OX=3562 GN=SOVF_030860 PE=4 SV=1
TRINITY_DN8273_c0_g1_i4	3663	99.37	0	0.82	0	0.56	0	-9.53094	tr|A0A0K9RML6|A0A0K9RML6_SPIOL Phospholipase D OS=Spinacia oleracea OX=3562 GN=SOVF_049470 PE=3 SV=1
TRINITY_DN914_c1_g1_i2	976	99.09	0	3.58	0	2.47	0	-9.53094	tr|A0A0K9R303|A0A0K9R303_SPIOL Uncharacterized protein (Fragment) OS=Spinacia oleracea OX=3562 GN=SOVF_118930 PE=4 SV=1
TRINITY_DN3041_c0_g1_i1	698	98.34	0	5.47	0	3.77	0	-9.51631	tr|A0A0K9QE53|A0A0K9QE53_SPIOL Uncharacterized protein OS=Spinacia oleracea OX=3562 GN=SOVF_189320 PE=4 SV=1
TRINITY_DN4070_c0_g1_i1	1386	97.62	0	2.32	0	1.6	0	-9.51631	tr|A0A0K9QGK1|A0A0K9QGK1_SPIOL Uncharacterized protein OS=Spinacia oleracea OX=3562 GN=SOVF_180970 PE=4 SV=1
TRINITY_DN4346_c0_g1_i2	2511	97.9	0	1.2	0	0.83	0	-9.51631	tr|A0A0J8B6L3|A0A0J8B6L3_BETVU Uncharacterized protein OS=Beta vulgaris subsp. vulgaris OX=3555 GN=BVRB_8g201270 PE=4 SV=1
TRINITY_DN1080_c1_g1_i6	2720	96.55	0	1.09	0	0.75	0	-9.50153	tr|A0A0K9RBH4|A0A0K9RBH4_SPIOL Uncharacterized protein OS=Spinacia oleracea OX=3562 GN=SOVF_092040 PE=3 SV=1
TRINITY_DN11706_c0_g1_i2	426	97.26	0	11.46	0	7.9	0	-9.50153	-
TRINITY_DN4589_c0_g1_i2	1364	97	0	2.35	0	1.62	0	-9.50153	-
TRINITY_DN1018_c0_g1_i27	2496	96.36	0	1.19	0	0.82	0	-9.4866	tr|A0A0K9QRE4|A0A0K9QRE4_SPIOL Uncharacterized protein OS=Spinacia oleracea OX=3562 GN=SOVF_149740 PE=4 SV=1
TRINITY_DN2305_c2_g1_i10	3285	96.1	0.11	0.89	0	0.61	0	-9.4866	tr|A0A0K9S2I1|A0A0K9S2I1_SPIOL Carboxypeptidase OS=Spinacia oleracea OX=3562 GN=SOVF_007550 PE=3 SV=1
TRINITY_DN3711_c0_g3_i2	1850	95.93	0	1.65	0	1.13	0	-9.4866	tr|A0A0K9QYU0|A0A0K9QYU0_SPIOL Uncharacterized protein OS=Spinacia oleracea OX=3562 GN=SOVF_131140 PE=4 SV=1
TRINITY_DN3838_c0_g1_i3	1975	96.4	0	1.54	0	1.06	0	-9.4866	tr|A0A0K9RCI7|A0A0K9RCI7_SPIOL Uncharacterized protein OS=Spinacia oleracea OX=3562 GN=SOVF_088260 PE=4 SV=1
TRINITY_DN4349_c0_g1_i4	1769	95.65	0	1.72	0	1.19	0	-9.4866	tr|A0A0K9QIV7|A0A0K9QIV7_SPIOL Uncharacterized protein OS=Spinacia oleracea OX=3562 GN=SOVF_174230 PE=4 SV=1
TRINITY_DN4847_c0_g1_i12	2593	96.49	0	1.14	0	0.79	0	-9.4866	tr|A0A0K9R522|A0A0K9R522_SPIOL Uncharacterized protein OS=Spinacia oleracea OX=3562 GN=SOVF_111120 PE=4 SV=1
TRINITY_DN4976_c0_g2_i4	379	96.15	0	14.01	0	9.66	0	-9.4866	-
TRINITY_DN1284_c0_g1_i14	1595	95.01	0	1.92	0	1.33	0	-9.47152	tr|A0A0K9RJS6|A0A0K9RJS6_SPIOL Uncharacterized protein (Fragment) OS=Spinacia oleracea OX=3562 GN=SOVF_058520 PE=4 SV=1
TRINITY_DN1716_c0_g2_i13	2267	94.67	0	1.3	0	0.9	0	-9.47152	tr|A0A0K9R2S5|A0A0K9R2S5_SPIOL Uncharacterized protein OS=Spinacia oleracea OX=3562 GN=SOVF_113260 PE=4 SV=1
TRINITY_DN3037_c0_g1_i3	3661	95.01	0	0.78	0	0.54	0	-9.47152	tr|A0A0K9RLQ8|A0A0K9RLQ8_SPIOL Uncharacterized protein OS=Spinacia oleracea OX=3562 GN=SOVF_057610 PE=3 SV=1
TRINITY_DN3155_c0_g2_i5	4913	95.09	0	0.57	0	0.4	0	-9.47152	tr|A0A0J8CW72|A0A0J8CW72_BETVU Uncharacterized protein OS=Beta vulgaris subsp. vulgaris OX=3555 GN=BVRB_2g033110 PE=4 SV=1
TRINITY_DN484_c0_g3_i3	3018	95.16	0	0.96	0	0.66	0	-9.47152	tr|A0A0K9RYF9|A0A0K9RYF9_SPIOL Uncharacterized protein OS=Spinacia oleracea OX=3562 GN=SOVF_019340 PE=3 SV=1
TRINITY_DN13678_c0_g1_i6	1553	94.42	0	1.97	0	1.36	0	-9.45627	tr|A0A0K9QEJ0|A0A0K9QEJ0_SPIOL Uncharacterized protein OS=Spinacia oleracea OX=3562 GN=SOVF_188100 PE=4 SV=1
TRINITY_DN1673_c1_g1_i11	777	93.5	0	4.51	0	3.11	0	-9.45627	tr|A0A0K9RJ00|A0A0K9RJ00_SPIOL Uncharacterized protein OS=Spinacia oleracea OX=3562 GN=SOVF_067120 PE=4 SV=1
TRINITY_DN200_c0_g1_i2	1588	93.95	0	1.91	0	1.32	0	-9.45627	tr|A0A0J8BBA5|A0A0J8BBA5_BETVU Uncharacterized protein OS=Beta vulgaris subsp. vulgaris OX=3555 GN=BVRB_4g094940 PE=4 SV=1
TRINITY_DN2254_c0_g2_i3	1693	94.49	0	1.79	0	1.23	0	-9.45627	tr|A0A0K9RZL3|A0A0K9RZL3_SPIOL Uncharacterized protein OS=Spinacia oleracea OX=3562 GN=SOVF_016210 PE=4 SV=1
TRINITY_DN2660_c0_g2_i17	1602	94.18	0	1.9	0	1.31	0	-9.45627	tr|A0A0K9QRM2|A0A0K9QRM2_SPIOL Uncharacterized protein OS=Spinacia oleracea OX=3562 GN=SOVF_156170 PE=4 SV=1
TRINITY_DN2917_c0_g1_i5	5064	93.88	0	0.55	0	0.38	0	-9.45627	tr|A0A0K9S2N6|A0A0K9S2N6_SPIOL Uncharacterized protein OS=Spinacia oleracea OX=3562 GN=SOVF_000050 PE=4 SV=1
TRINITY_DN3396_c0_g1_i9	5803	94.21	0	0.48	0	0.33	0	-9.45627	tr|A0A0K9R553|A0A0K9R553_SPIOL Uncharacterized protein OS=Spinacia oleracea OX=3562 GN=SOVF_105840 PE=3 SV=1
TRINITY_DN3771_c0_g2_i4	2519	94.19	0	1.15	0	0.79	0	-9.45627	tr|A0A0K9RUE2|A0A0K9RUE2_SPIOL Uncharacterized protein OS=Spinacia oleracea OX=3562 GN=SOVF_033370 PE=3 SV=1
TRINITY_DN3838_c0_g1_i5	2033	94.42	0	1.46	0	1.01	0	-9.45627	tr|A0A0K9RCI7|A0A0K9RCI7_SPIOL Uncharacterized protein OS=Spinacia oleracea OX=3562 GN=SOVF_088260 PE=4 SV=1
TRINITY_DN5420_c0_g2_i5	2577	93.55	0	1.12	0	0.77	0	-9.45627	tr|A0A0K9R533|A0A0K9R533_SPIOL Uncharacterized protein OS=Spinacia oleracea OX=3562 GN=SOVF_105710 PE=4 SV=1
TRINITY_DN605_c0_g1_i12	4840	94.29	0	0.58	0	0.4	0	-9.45627	tr|A0A0K9QIM1|A0A0K9QIM1_SPIOL Uncharacterized protein OS=Spinacia oleracea OX=3562 GN=SOVF_180110 PE=4 SV=1
TRINITY_DN624_c1_g1_i8	1600	94.13	0	1.9	0	1.31	0	-9.45627	tr|A0A0K9R509|A0A0K9R509_SPIOL Uncharacterized protein OS=Spinacia oleracea OX=3562 GN=SOVF_111280 PE=4 SV=1
TRINITY_DN861_c0_g1_i13	4045	93.94	0	0.7	0	0.48	0	-9.45627	tr|A0A0K9S0R4|A0A0K9S0R4_SPIOL Uncharacterized protein OS=Spinacia oleracea OX=3562 GN=SOVF_012820 PE=4 SV=1
TRINITY_DN9623_c0_g1_i13	3879	94.36	0	0.73	0	0.5	0	-9.45627	tr|A0A0K9R5L6|A0A0K9R5L6_SPIOL Uncharacterized protein OS=Spinacia oleracea OX=3562 GN=SOVF_104290 PE=4 SV=1
TRINITY_DN1264_c0_g1_i11	2966	92.65	0	0.95	0	0.66	0	-9.44086	tr|A0A0K9QR83|A0A0K9QR83_SPIOL Uncharacterized protein OS=Spinacia oleracea OX=3562 GN=SOVF_150330 PE=4 SV=1
TRINITY_DN1678_c2_g1_i7	1428	92.78	0	2.13	0	1.47	0	-9.44086	tr|A0A0K9R643|A0A0K9R643_SPIOL Uncharacterized protein OS=Spinacia oleracea OX=3562 GN=SOVF_107780 PE=4 SV=1
TRINITY_DN227_c0_g1_i6	1050	92.51	0	3.05	0	2.1	0	-9.44086	tr|A0A0K9RCS0|A0A0K9RCS0_SPIOL Uncharacterized protein OS=Spinacia oleracea OX=3562 GN=SOVF_081140 PE=4 SV=1
TRINITY_DN316_c0_g1_i2	3005	93.3	0	0.95	0	0.65	0	-9.44086	tr|A0A0K9RUF1|A0A0K9RUF1_SPIOL Uncharacterized protein OS=Spinacia oleracea OX=3562 GN=SOVF_033400 PE=4 SV=1
TRINITY_DN3777_c0_g1_i9	5180	92.94	0.42	0.53	0	0.37	0	-9.44086	tr|A0A0K9QR35|A0A0K9QR35_SPIOL Uncharacterized protein OS=Spinacia oleracea OX=3562 GN=SOVF_150600 PE=4 SV=1
TRINITY_DN6434_c1_g2_i3	3431	93.14	0	0.82	0	0.57	0	-9.44086	tr|A0A0K9Q8R1|A0A0K9Q8R1_SPIOL Aldehyde dehydrogenase OS=Spinacia oleracea OX=3562 GN=SOVF_212440 PE=3 SV=1
TRINITY_DN8346_c1_g2_i1	974	92.86	0	3.36	0	2.32	0	-9.44086	-
TRINITY_DN3646_c0_g1_i1	2950	91.85	0.3	0.95	0	0.65	0	-9.42529	tr|A0A0K9Q7H1|A0A0K9Q7H1_SPIOL Actin-related protein 2 OS=Spinacia oleracea OX=3562 GN=SOVF_211660 PE=3 SV=1
TRINITY_DN663_c0_g1_i10	2438	91.51	0	1.16	0	0.8	0	-9.42529	tr|A0A0K9QN98|A0A0K9QN98_SPIOL Peptidylprolyl isomerase (Fragment) OS=Spinacia oleracea OX=3562 GN=SOVF_160160 PE=4 SV=1
TRINITY_DN1011_c0_g1_i1	1816	91.12	0	1.6	0	1.1	0	-9.40955	tr|A0A0K9QT10|A0A0K9QT10_SPIOL Uncharacterized protein OS=Spinacia oleracea OX=3562 GN=SOVF_144390 PE=3 SV=1
TRINITY_DN2127_c0_g1_i17	3384	91.4	0	0.82	0	0.56	0	-9.40955	tr|A0A0K9QTE8|A0A0K9QTE8_SPIOL Uncharacterized protein OS=Spinacia oleracea OX=3562 GN=SOVF_143210 PE=3 SV=1
TRINITY_DN2458_c0_g2_i12	3264	90.94	0	0.84	0	0.58	0	-9.40955	tr|A8E124|A8E124_SPIOL NEP1-interacting protein OS=Spinacia oleracea OX=3562 GN=nip PE=2 SV=1
TRINITY_DN2500_c0_g1_i4	2832	91.41	0.02	0.99	0	0.68	0	-9.40955	tr|A0A0K9S096|A0A0K9S096_SPIOL Uncharacterized protein OS=Spinacia oleracea OX=3562 GN=SOVF_014560 PE=3 SV=1
TRINITY_DN3836_c0_g1_i13	4337	90.73	0	0.62	0	0.43	0	-9.40955	tr|A0A0K9QFK3|A0A0K9QFK3_SPIOL Uncharacterized protein OS=Spinacia oleracea OX=3562 GN=SOVF_184660 PE=3 SV=1
TRINITY_DN3860_c0_g1_i10	368	91.26	0	14.07	0	9.7	0	-9.40955	tr|A0A0J8B1W2|A0A0J8B1W2_BETVU Uncharacterized protein OS=Beta vulgaris subsp. vulgaris OX=3555 GN=BVRB_013260 PE=4 SV=1
TRINITY_DN2358_c0_g1_i11	2428	89.75	0	1.14	0	0.79	0	-9.39363	tr|A0A0K9RYT6|A0A0K9RYT6_SPIOL Uncharacterized protein OS=Spinacia oleracea OX=3562 GN=SOVF_013520 PE=4 SV=1
TRINITY_DN3488_c1_g1_i3	3134	90.37	0	0.88	0	0.6	0	-9.39363	tr|A0A0K9RJE0|A0A0K9RJE0_SPIOL Pectinesterase OS=Spinacia oleracea OX=3562 GN=SOVF_060080 PE=4 SV=1
TRINITY_DN5233_c0_g1_i6	2489	89.69	0	1.11	0	0.77	0	-9.39363	tr|A0A0K9R9M9|A0A0K9R9M9_SPIOL Uncharacterized protein (Fragment) OS=Spinacia oleracea OX=3562 GN=SOVF_095880 PE=4 SV=1
TRINITY_DN12946_c0_g2_i2	3204	89	0	0.84	0	0.58	0	-9.37753	-
TRINITY_DN7149_c0_g1_i2	631	89.06	0	5.69	0	3.93	0	-9.37753	tr|G9FIF2|G9FIF2_BETVU Uncharacterized protein OS=Beta vulgaris OX=161934 PE=4 SV=1
TRINITY_DN772_c0_g1_i18	3109	88.82	0	0.87	0	0.6	0	-9.37753	tr|A0A0K9Q6J1|A0A0K9Q6J1_SPIOL Uncharacterized protein OS=Spinacia oleracea OX=3562 GN=SOVF_216860 PE=4 SV=1
TRINITY_DN868_c0_g1_i3	2533	89.26	0	1.09	0	0.75	0	-9.37753	tr|A0A0K9RT31|A0A0K9RT31_SPIOL Uncharacterized protein OS=Spinacia oleracea OX=3562 GN=SOVF_032180 PE=3 SV=1
TRINITY_DN7669_c0_g1_i14	5498	87.96	0	0.47	0	0.33	0	-9.36125	tr|A0A0K9RPX2|A0A0K9RPX2_SPIOL Telomerase reverse transcriptase OS=Spinacia oleracea OX=3562 GN=SOVF_041310 PE=3 SV=1
TRINITY_DN8751_c0_g1_i5	1278	87.77	0	2.29	0	1.58	0	-9.36125	-
TRINITY_DN10605_c0_g1_i2	951	87.4	0	3.26	0	2.24	0	-9.34479	-
TRINITY_DN11988_c2_g1_i4	2745	87	0	0.97	0	0.67	0	-9.34479	-
TRINITY_DN1353_c1_g1_i1	2577	86.7	0	1.04	0	0.71	0	-9.34479	tr|A0A0K9REV3|A0A0K9REV3_SPIOL Uncharacterized protein OS=Spinacia oleracea OX=3562 GN=SOVF_074670 PE=4 SV=1
TRINITY_DN3054_c0_g3_i3	1763	87.22	0	1.58	0	1.09	0	-9.34479	tr|A0A0K9S2C5|A0A0K9S2C5_SPIOL Uncharacterized protein OS=Spinacia oleracea OX=3562 GN=SOVF_002660 PE=4 SV=1
TRINITY_DN3288_c0_g1_i6	2820	86.79	0	0.94	0	0.65	0	-9.34479	tr|A0A0K9RP72|A0A0K9RP72_SPIOL Signal peptidase I OS=Spinacia oleracea OX=3562 GN=SOVF_044460 PE=3 SV=1
TRINITY_DN3777_c0_g1_i1	1908	87.28	0	1.45	0	1	0	-9.34479	tr|A0A0K9QRB7|A0A0K9QRB7_SPIOL Uncharacterized protein OS=Spinacia oleracea OX=3562 GN=SOVF_150600 PE=4 SV=1
TRINITY_DN5044_c0_g1_i4	590	86.95	0	6.12	0	4.22	0	-9.34479	-
TRINITY_DN16360_c0_g1_i11	2125	85.93	0	1.26	0	0.87	0	-9.32814	tr|A0A0K9R942|A0A0K9R942_SPIOL Uncharacterized protein OS=Spinacia oleracea OX=3562 GN=SOVF_097740 PE=4 SV=1
TRINITY_DN2707_c0_g2_i7	1583	86.25	0	1.76	0	1.21	0	-9.32814	tr|A0A0K9RIM4|A0A0K9RIM4_SPIOL Xyloglucan endotransglucosylase/hydrolase OS=Spinacia oleracea OX=3562 GN=SOVF_062300 PE=3 SV=1
TRINITY_DN39646_c0_g1_i1	1175	86	0	2.48	0	1.71	0	-9.32814	-
TRINITY_DN5384_c0_g1_i15	1820	85.99	0	1.5	0	1.04	0	-9.32814	tr|A0A0K9QJV5|A0A0K9QJV5_SPIOL Uncharacterized protein (Fragment) OS=Spinacia oleracea OX=3562 GN=SOVF_175270 PE=3 SV=1
TRINITY_DN6025_c1_g1_i8	1233	85.68	0.05	2.33	0	1.61	0	-9.32814	tr|A0A0K9QHS5|A0A0K9QHS5_SPIOL Uncharacterized protein OS=Spinacia oleracea OX=3562 GN=SOVF_182460 PE=4 SV=1
TRINITY_DN6799_c0_g1_i7	2631	86.18	0	1.01	0	0.69	0	-9.32814	tr|A0A0K9RDG5|A0A0K9RDG5_SPIOL GDT1 family protein OS=Spinacia oleracea OX=3562 GN=SOVF_078320 PE=3 SV=1
TRINITY_DN6832_c0_g1_i1	3557	85.89	0	0.73	0	0.5	0	-9.32814	tr|F4NCF7|F4NCF7_BETVU Uncharacterized protein OS=Beta vulgaris subsp. vulgaris OX=3555 PE=4 SV=1
TRINITY_DN236_c0_g1_i3	3141	84.97	0	0.82	0	0.57	0	-9.31129	tr|A0A0K9QQA9|A0A0K9QQA9_SPIOL Uncharacterized protein OS=Spinacia oleracea OX=3562 GN=SOVF_158760 PE=4 SV=1
TRINITY_DN28886_c0_g1_i8	5774	84.94	0	0.43	0	0.3	0	-9.31129	tr|F4NCG1|F4NCG1_BETVU Uncharacterized protein OS=Beta vulgaris subsp. vulgaris OX=3555 PE=4 SV=1
TRINITY_DN5618_c0_g2_i12	3029	85	0.19	0.85	0	0.59	0	-9.31129	tr|A0A0K9Q9A8|A0A0K9Q9A8_SPIOL Uncharacterized protein OS=Spinacia oleracea OX=3562 GN=SOVF_205350 PE=4 SV=1
TRINITY_DN611_c0_g1_i2	3694	84.96	0	0.69	0	0.48	0	-9.31129	tr|A0A0K9R052|A0A0K9R052_SPIOL Uncharacterized protein OS=Spinacia oleracea OX=3562 GN=SOVF_126980 PE=4 SV=1
TRINITY_DN1964_c0_g1_i8	1772	84.45	0	1.52	0	1.05	0	-9.29424	tr|A0A0K9RK54|A0A0K9RK54_SPIOL Uncharacterized protein OS=Spinacia oleracea OX=3562 GN=SOVF_057340 PE=4 SV=1
TRINITY_DN2261_c1_g1_i7	3121	83.75	0	0.81	0	0.56	0	-9.29424	tr|A0A0K9S241|A0A0K9S241_SPIOL Uncharacterized protein OS=Spinacia oleracea OX=3562 GN=SOVF_009050 PE=3 SV=1
TRINITY_DN4560_c0_g2_i4	2642	84.13	0	0.98	0	0.67	0	-9.29424	tr|A0A0J8B9F6|A0A0J8B9F6_BETVU Uncharacterized protein OS=Beta vulgaris subsp. vulgaris OX=3555 GN=BVRB_4g097190 PE=3 SV=1
TRINITY_DN675_c0_g1_i2	1524	84.27	0	1.8	0	1.24	0	-9.29424	tr|A0A0K9QY65|A0A0K9QY65_SPIOL Uncharacterized protein OS=Spinacia oleracea OX=3562 GN=SOVF_127230 PE=4 SV=1
TRINITY_DN9792_c0_g1_i4	490	83.82	0	7.82	0	5.39	0	-9.29424	-
TRINITY_DN2076_c0_g1_i1	1938	82.59	0	1.35	0	0.93	0	-9.27699	tr|A0A0K9QRS3|A0A0K9QRS3_SPIOL Uncharacterized protein OS=Spinacia oleracea OX=3562 GN=SOVF_148890 PE=4 SV=1
TRINITY_DN2566_c0_g1_i1	1328	83.47	0	2.08	0	1.44	0	-9.27699	-
TRINITY_DN2643_c2_g2_i4	3496	83.17	0	0.72	0	0.49	0	-9.27699	tr|A0A0K9R3N3|A0A0K9R3N3_SPIOL Uncharacterized protein OS=Spinacia oleracea OX=3562 GN=SOVF_115460 PE=4 SV=1
TRINITY_DN3646_c0_g1_i7	2871	82.67	0.14	0.88	0	0.61	0	-9.27699	tr|A0A0K9Q7H1|A0A0K9Q7H1_SPIOL Actin-related protein 2 OS=Spinacia oleracea OX=3562 GN=SOVF_211660 PE=3 SV=1
TRINITY_DN3652_c0_g1_i10	2104	83.03	0	1.24	0	0.85	0	-9.27699	tr|A0A0K9QLC9|A0A0K9QLC9_SPIOL Uncharacterized protein OS=Spinacia oleracea OX=3562 GN=SOVF_165960 PE=3 SV=1
TRINITY_DN491_c0_g1_i5	2698	83.11	0	0.94	0	0.65	0	-9.27699	tr|A0A0K9QYR6|A0A0K9QYR6_SPIOL Uncharacterized protein OS=Spinacia oleracea OX=3562 GN=SOVF_126340 PE=3 SV=1
TRINITY_DN579_c0_g1_i9	4435	83.28	0	0.56	0	0.39	0	-9.27699	tr|A0A0K9QYF0|A0A0K9QYF0_SPIOL Uncharacterized protein OS=Spinacia oleracea OX=3562 GN=SOVF_132420 PE=4 SV=1
TRINITY_DN6206_c0_g1_i9	1867	83.43	0	1.42	0	0.98	0	-9.27699	tr|A0A0K9S0M3|A0A0K9S0M3_SPIOL Uncharacterized protein OS=Spinacia oleracea OX=3562 GN=SOVF_013460 PE=4 SV=1
TRINITY_DN7602_c0_g1_i4	2941	83.36	0	0.86	0	0.6	0	-9.27699	tr|A0A0J8B4R8|A0A0J8B4R8_BETVU Uncharacterized protein OS=Beta vulgaris subsp. vulgaris OX=3555 GN=BVRB_003270 PE=3 SV=1
TRINITY_DN7739_c0_g1_i2	2164	83	0	1.2	0	0.83	0	-9.27699	tr|A0A0K9QX09|A0A0K9QX09_SPIOL Uncharacterized protein (Fragment) OS=Spinacia oleracea OX=3562 GN=SOVF_131870 PE=4 SV=1
TRINITY_DN1181_c0_g3_i4	2399	81.62	0	1.05	0	0.73	0	-9.25954	tr|A0A0K9QHU3|A0A0K9QHU3_SPIOL Uncharacterized protein OS=Spinacia oleracea OX=3562 GN=SOVF_183860 PE=4 SV=1
TRINITY_DN2582_c1_g1_i12	2402	82.01	0	1.06	0	0.73	0	-9.25954	tr|A0A0K9R7L7|A0A0K9R7L7_SPIOL Uncharacterized protein OS=Spinacia oleracea OX=3562 GN=SOVF_102150 PE=4 SV=1
TRINITY_DN2722_c0_g1_i5	4118	81.57	0	0.59	0	0.41	0	-9.25954	tr|A0A0K9QTY7|A0A0K9QTY7_SPIOL Uncharacterized protein OS=Spinacia oleracea OX=3562 GN=SOVF_146970 PE=4 SV=1
TRINITY_DN3498_c0_g1_i2	469	81.92	0	8.21	0	5.66	0	-9.25954	-
TRINITY_DN5155_c0_g1_i2	2949	82.12	0.21	0.85	0	0.59	0	-9.25954	tr|A0A0K9QQQ2|A0A0K9QQQ2_SPIOL Uncharacterized protein OS=Spinacia oleracea OX=3562 GN=SOVF_152230 PE=4 SV=1
TRINITY_DN6303_c1_g1_i7	1574	81.9	0.1	1.68	0	1.16	0	-9.25954	tr|A0A0K9RCV1|A0A0K9RCV1_SPIOL Protein yippee-like OS=Spinacia oleracea OX=3562 GN=SOVF_081200 PE=3 SV=1
TRINITY_DN1044_c0_g1_i18	6594	81.18	0	0.36	0	0.25	0	-9.24186	tr|A0A0K9R9D0|A0A0K9R9D0_SPIOL Uncharacterized protein (Fragment) OS=Spinacia oleracea OX=3562 GN=SOVF_096440 PE=4 SV=1
TRINITY_DN12187_c0_g1_i8	2273	81.1	0.38	1.11	0.01	0.76	0	-9.24186	tr|A0A0K9RIW7|A0A0K9RIW7_SPIOL Uncharacterized protein OS=Spinacia oleracea OX=3562 GN=SOVF_067480 PE=4 SV=1
TRINITY_DN1635_c0_g1_i10	3578	80.95	0	0.68	0	0.47	0	-9.24186	tr|A0A0K9S451|A0A0K9S451_SPIOL Uncharacterized protein OS=Spinacia oleracea OX=3562 GN=SOVF_001990 PE=3 SV=1
TRINITY_DN2201_c0_g1_i9	3364	80.58	0	0.72	0	0.5	0	-9.24186	tr|A0A0K9RPP7|A0A0K9RPP7_SPIOL Folylpolyglutamate synthase OS=Spinacia oleracea OX=3562 GN=SOVF_048480 PE=3 SV=1
TRINITY_DN2548_c0_g1_i24	3268	80.77	0	0.75	0	0.52	0	-9.24186	tr|A0A0J8BBB4|A0A0J8BBB4_BETVU Uncharacterized protein OS=Beta vulgaris subsp. vulgaris OX=3555 GN=BVRB_4g095040 PE=4 SV=1
TRINITY_DN2779_c0_g1_i2	3438	81.4	0	0.71	0	0.49	0	-9.24186	tr|A0A0K9RKT5|A0A0K9RKT5_SPIOL Uncharacterized protein OS=Spinacia oleracea OX=3562 GN=SOVF_060710 PE=4 SV=1
TRINITY_DN3135_c0_g2_i3	2904	81.24	0	0.85	0	0.59	0	-9.24186	tr|A0A0K9QQJ0|A0A0K9QQJ0_SPIOL Uncharacterized protein OS=Spinacia oleracea OX=3562 GN=SOVF_152790 PE=4 SV=1
TRINITY_DN3974_c0_g2_i14	313	80.64	0	17.41	0	12.01	0	-9.24186	-
TRINITY_DN5033_c0_g1_i11	390	80.57	0	11.13	0	7.67	0	-9.24186	-
TRINITY_DN6423_c0_g1_i7	1248	80.84	0	2.17	0	1.5	0	-9.24186	tr|A0A0K9QCZ9|A0A0K9QCZ9_SPIOL Methionine aminopeptidase OS=Spinacia oleracea OX=3562 GN=SOVF_192940 PE=3 SV=1
TRINITY_DN774_c0_g1_i11	4850	80.99	0	0.5	0	0.34	0	-9.24186	tr|A0A0K9RY77|A0A0K9RY77_SPIOL Uncharacterized protein OS=Spinacia oleracea OX=3562 GN=SOVF_021290 PE=4 SV=1
TRINITY_DN889_c0_g1_i8	2728	81.24	0	0.91	0	0.63	0	-9.24186	tr|A0A0K9QNF8|A0A0K9QNF8_SPIOL Fumarylacetoacetase OS=Spinacia oleracea OX=3562 GN=SOVF_159100 PE=3 SV=1
TRINITY_DN9082_c0_g5_i1	1028	81	0	2.74	0	1.89	0	-9.24186	-
TRINITY_DN958_c0_g1_i9	1014	80.71	0	2.78	0	1.92	0	-9.24186	tr|A0A0J8BFX3|A0A0J8BFX3_BETVU Uncharacterized protein OS=Beta vulgaris subsp. vulgaris OX=3555 GN=BVRB_3g067930 PE=4 SV=1
TRINITY_DN20914_c0_g4_i1	6664	79.75	0	0.35	0	0.24	0	-9.22397	tr|A0A0K9S2T2|A0A0K9S2T2_SPIOL Uncharacterized protein OS=Spinacia oleracea OX=3562 GN=SOVF_006490 PE=4 SV=1
TRINITY_DN279_c1_g1_i7	3238	79.81	0	0.75	0	0.51	0	-9.22397	tr|A0A0K9RZZ0|A0A0K9RZZ0_SPIOL Uncharacterized protein OS=Spinacia oleracea OX=3562 GN=SOVF_009900 PE=3 SV=1
TRINITY_DN2909_c3_g2_i8	391	80.11	0	11.01	0	7.59	0	-9.22397	-
TRINITY_DN3481_c0_g1_i1	3324	79.79	0	0.73	0	0.5	0	-9.22397	tr|A0A0K9RYI6|A0A0K9RYI6_SPIOL Uncharacterized protein OS=Spinacia oleracea OX=3562 GN=SOVF_014210 PE=4 SV=1
TRINITY_DN4117_c0_g1_i7	7377	80.07	0	0.32	0	0.22	0	-9.22397	tr|A0A0K9R441|A0A0K9R441_SPIOL Uncharacterized protein OS=Spinacia oleracea OX=3562 GN=SOVF_108940 PE=4 SV=1
TRINITY_DN4144_c0_g1_i13	786	79.53	0	3.77	0	2.6	0	-9.22397	-
TRINITY_DN5411_c0_g1_i1	2965	80.09	0	0.82	0	0.57	0	-9.22397	tr|A0A0K9RDX4|A0A0K9RDX4_SPIOL Uncharacterized protein OS=Spinacia oleracea OX=3562 GN=SOVF_077680 PE=4 SV=1
TRINITY_DN646_c0_g2_i6	3297	79.92	0.44	0.73	0	0.51	0	-9.22397	tr|A0A0K9RSQ9|A0A0K9RSQ9_SPIOL Uncharacterized protein OS=Spinacia oleracea OX=3562 GN=SOVF_032820 PE=3 SV=1
TRINITY_DN6897_c0_g1_i4	1752	80.11	0	1.46	0	1.01	0	-9.22397	tr|A0A0K9QKM1|A0A0K9QKM1_SPIOL Uncharacterized protein OS=Spinacia oleracea OX=3562 GN=SOVF_168600 PE=3 SV=1
TRINITY_DN842_c0_g1_i34	1707	79.81	0	1.5	0	1.03	0	-9.22397	tr|A0A0K9S3U4|A0A0K9S3U4_SPIOL Vacuolar cation/proton exchanger OS=Spinacia oleracea OX=3562 GN=SOVF_002360 PE=3 SV=1
TRINITY_DN11196_c0_g1_i22	8989	78.55	0	0.25	0	0.18	0	-9.20585	tr|A0A0J8B352|A0A0J8B352_BETVU Uncharacterized protein OS=Beta vulgaris subsp. vulgaris OX=3555 GN=BVRB_008340 PE=4 SV=1
TRINITY_DN161_c0_g1_i15	5679	79.4	0	0.41	0	0.28	0	-9.20585	tr|A0A0K9RCT4|A0A0K9RCT4_SPIOL Uncharacterized protein OS=Spinacia oleracea OX=3562 GN=SOVF_081340 PE=4 SV=1
TRINITY_DN21028_c0_g1_i2	3663	79	0	0.65	0	0.45	0	-9.20585	tr|A0A0K9QD63|A0A0K9QD63_SPIOL Uncharacterized protein (Fragment) OS=Spinacia oleracea OX=3562 GN=SOVF_198060 PE=4 SV=1
TRINITY_DN2904_c0_g1_i14	7094	78.96	0	0.33	0	0.23	0	-9.20585	tr|A0A0K9RDU2|A0A0K9RDU2_SPIOL Uncharacterized protein (Fragment) OS=Spinacia oleracea OX=3562 GN=SOVF_078740 PE=4 SV=1
TRINITY_DN3508_c2_g1_i3	5920	79.02	0	0.39	0	0.27	0	-9.20585	tr|A0A0K9RNH3|A0A0K9RNH3_SPIOL Uncharacterized protein (Fragment) OS=Spinacia oleracea OX=3562 GN=SOVF_052840 PE=4 SV=1
TRINITY_DN4406_c1_g1_i2	2276	78.9	0	1.08	0	0.74	0	-9.20585	tr|A0A0K9R5B2|A0A0K9R5B2_SPIOL Uncharacterized protein OS=Spinacia oleracea OX=3562 GN=SOVF_104450 PE=4 SV=1
TRINITY_DN5012_c0_g1_i3	3129	78.61	0	0.76	0	0.53	0	-9.20585	tr|A0A0J8E4V4|A0A0J8E4V4_BETVU Uncharacterized protein OS=Beta vulgaris subsp. vulgaris OX=3555 GN=BVRB_4g095070 PE=3 SV=1
TRINITY_DN7345_c0_g2_i1	4104	78.89	0	0.58	0	0.4	0	-9.20585	tr|A0A0K9RZS1|A0A0K9RZS1_SPIOL Uncharacterized protein OS=Spinacia oleracea OX=3562 GN=SOVF_010360 PE=3 SV=1
TRINITY_DN7669_c0_g1_i9	4439	79.46	0	0.53	0	0.37	0	-9.20585	tr|A0A0K9RPX2|A0A0K9RPX2_SPIOL Telomerase reverse transcriptase OS=Spinacia oleracea OX=3562 GN=SOVF_041310 PE=3 SV=1
TRINITY_DN8497_c1_g5_i1	739	79	0	4.07	0	2.8	0	-9.20585	-
TRINITY_DN1182_c1_g1_i2	3878	78.06	0	0.6	0	0.42	0	-9.18751	tr|A0A0K9RUN3|A0A0K9RUN3_SPIOL Uncharacterized protein OS=Spinacia oleracea OX=3562 GN=SOVF_027250 PE=3 SV=1
TRINITY_DN13053_c0_g1_i6	5206	77.74	0.13	0.44	0	0.3	0	-9.18751	tr|A0A0K9QW70|A0A0K9QW70_SPIOL Uncharacterized protein OS=Spinacia oleracea OX=3562 GN=SOVF_139430 PE=3 SV=1
TRINITY_DN3552_c0_g1_i5	5079	78.49	0	0.46	0	0.32	0	-9.18751	tr|A0A0K9RDS3|A0A0K9RDS3_SPIOL Uncharacterized protein OS=Spinacia oleracea OX=3562 GN=SOVF_082930 PE=4 SV=1
TRINITY_DN3713_c0_g1_i9	2865	77.76	0	0.83	0	0.57	0	-9.18751	tr|A0A0K9R5T9|A0A0K9R5T9_SPIOL Uncharacterized protein OS=Spinacia oleracea OX=3562 GN=SOVF_110110 PE=4 SV=1
TRINITY_DN4323_c0_g1_i1	2273	77.97	0	1.07	0	0.74	0	-9.18751	tr|A0A0K9QZ12|A0A0K9QZ12_SPIOL Uncharacterized protein OS=Spinacia oleracea OX=3562 GN=SOVF_131710 PE=4 SV=1
TRINITY_DN492_c0_g1_i4	2205	77.8	0	1.1	0	0.76	0	-9.18751	sp|Q9XGA0|KPRS3_SPIOL Ribose-phosphate pyrophosphokinase 3, mitochondrial OS=Spinacia oleracea OX=3562 GN=PRS3 PE=2 SV=1
TRINITY_DN5114_c0_g1_i5	2926	77.82	0	0.81	0	0.56	0	-9.18751	tr|A0A0K9RPK1|A0A0K9RPK1_SPIOL Gamma-tubulin complex component OS=Spinacia oleracea OX=3562 GN=SOVF_042960 PE=3 SV=1
TRINITY_DN5965_c0_g1_i6	1411	78.18	0	1.82	0	1.26	0	-9.18751	tr|A0A0K9R5U9|A0A0K9R5U9_SPIOL Uncharacterized protein OS=Spinacia oleracea OX=3562 GN=SOVF_102900 PE=4 SV=1
TRINITY_DN6128_c0_g2_i3	2983	78.48	0	0.8	0	0.55	0	-9.18751	tr|A0A0J8B8H8|A0A0J8B8H8_BETVU Uncharacterized protein OS=Beta vulgaris subsp. vulgaris OX=3555 GN=BVRB_5g125880 PE=4 SV=1
TRINITY_DN6275_c0_g1_i4	2534	78.18	0	0.95	0	0.66	0	-9.18751	tr|A0A0K9RF49|A0A0K9RF49_SPIOL Uncharacterized protein OS=Spinacia oleracea OX=3562 GN=SOVF_073880 PE=4 SV=1
TRINITY_DN9864_c0_g1_i2	3923	78.01	0	0.6	0	0.41	0	-9.18751	-
TRINITY_DN2501_c0_g2_i2	1963	76.91	0	1.24	0	0.85	0	-9.16892	tr|A0A0K9QJE6|A0A0K9QJE6_SPIOL Uncharacterized protein OS=Spinacia oleracea OX=3562 GN=SOVF_172490 PE=3 SV=1
TRINITY_DN2900_c0_g1_i4	3026	76.67	0	0.77	0	0.53	0	-9.16892	tr|A0A0K9QQ68|A0A0K9QQ68_SPIOL Uncharacterized protein OS=Spinacia oleracea OX=3562 GN=SOVF_159040 PE=3 SV=1
TRINITY_DN3377_c0_g1_i3	4300	76.66	0	0.53	0	0.37	0	-9.16892	tr|A0A0J8FHS0|A0A0J8FHS0_BETVU Uncharacterized protein OS=Beta vulgaris subsp. vulgaris OX=3555 GN=BVRB_3g059610 PE=4 SV=1
TRINITY_DN367_c0_g1_i2	1568	76.87	0.01	1.59	0	1.09	0	-9.16892	tr|A0A0K9Q905|A0A0K9Q905_SPIOL Uncharacterized protein OS=Spinacia oleracea OX=3562 GN=SOVF_213220 PE=4 SV=1
TRINITY_DN3836_c0_g1_i4	2626	77.46	0	0.91	0	0.62	0	-9.16892	tr|A0A0K9QFK3|A0A0K9QFK3_SPIOL Uncharacterized protein OS=Spinacia oleracea OX=3562 GN=SOVF_184660 PE=3 SV=1
TRINITY_DN4117_c0_g1_i15	6019	76.78	0	0.38	0	0.26	0	-9.16892	tr|A0A0K9R441|A0A0K9R441_SPIOL Uncharacterized protein OS=Spinacia oleracea OX=3562 GN=SOVF_108940 PE=4 SV=1
TRINITY_DN5793_c0_g1_i20	2172	76.91	0.05	1.11	0	0.76	0	-9.16892	tr|A0A0K9QUW4|A0A0K9QUW4_SPIOL Uncharacterized protein OS=Spinacia oleracea OX=3562 GN=SOVF_138480 PE=4 SV=1
TRINITY_DN6041_c1_g2_i10	3037	77.07	0	0.77	0	0.53	0	-9.16892	tr|A0A0K9RUX0|A0A0K9RUX0_SPIOL Uncharacterized protein (Fragment) OS=Spinacia oleracea OX=3562 GN=SOVF_026490 PE=4 SV=1
TRINITY_DN1577_c0_g1_i18	6940	75.68	0	0.32	0	0.22	0	-9.1501	tr|I3NN21|I3NN21_BETVU Bolting time control 1 OS=Beta vulgaris subsp. vulgaris OX=3555 GN=BTC1 PE=2 SV=1
TRINITY_DN2660_c0_g2_i19	2798	75.78	0	0.83	0	0.57	0	-9.1501	tr|A0A0K9QRM2|A0A0K9QRM2_SPIOL Uncharacterized protein OS=Spinacia oleracea OX=3562 GN=SOVF_156170 PE=4 SV=1
TRINITY_DN279_c1_g1_i20	2376	75.54	0	0.98	0	0.68	0	-9.1501	tr|A0A0K9RZZ0|A0A0K9RZZ0_SPIOL Uncharacterized protein OS=Spinacia oleracea OX=3562 GN=SOVF_009900 PE=3 SV=1
TRINITY_DN745_c0_g1_i2	2164	75.56	0	1.09	0	0.75	0	-9.1501	tr|A0A0K9RXT9|A0A0K9RXT9_SPIOL Uncharacterized protein OS=Spinacia oleracea OX=3562 GN=SOVF_023120 PE=4 SV=1
TRINITY_DN8262_c0_g2_i2	2032	76.39	0	1.18	0	0.81	0	-9.1501	tr|A0A0K9RKC2|A0A0K9RKC2_SPIOL Carboxypeptidase OS=Spinacia oleracea OX=3562 GN=SOVF_062750 PE=3 SV=1
TRINITY_DN9338_c0_g1_i3	3162	76.5	0	0.73	0	0.51	0	-9.1501	tr|A0A0K9R015|A0A0K9R015_SPIOL Uncharacterized protein (Fragment) OS=Spinacia oleracea OX=3562 GN=SOVF_122240 PE=4 SV=1
TRINITY_DN1157_c0_g2_i3	1730	74.62	0	1.38	0	0.95	0	-9.13102	tr|A0A0K9RUC2|A0A0K9RUC2_SPIOL Uncharacterized protein OS=Spinacia oleracea OX=3562 GN=SOVF_027750 PE=4 SV=1
TRINITY_DN15492_c0_g1_i2	995	75.09	0	2.65	0	1.82	0	-9.13102	tr|A0A0K9QSP7|A0A0K9QSP7_SPIOL Uncharacterized protein OS=Spinacia oleracea OX=3562 GN=SOVF_151170 PE=4 SV=1
TRINITY_DN3509_c0_g1_i13	2116	74.8	0	1.11	0	0.76	0	-9.13102	-
TRINITY_DN4079_c0_g1_i12	2536	75.15	0	0.91	0	0.63	0	-9.13102	tr|A0A0K9QD46|A0A0K9QD46_SPIOL Uncharacterized protein OS=Spinacia oleracea OX=3562 GN=SOVF_192560 PE=4 SV=1
TRINITY_DN4406_c1_g1_i9	1670	74.62	0	1.43	0	0.99	0	-9.13102	tr|A0A0K9R5B2|A0A0K9R5B2_SPIOL Uncharacterized protein OS=Spinacia oleracea OX=3562 GN=SOVF_104450 PE=4 SV=1
TRINITY_DN699_c0_g2_i4	2460	75.31	0	0.95	0	0.65	0	-9.13102	tr|A0A0K9QX36|A0A0K9QX36_SPIOL Uncharacterized protein (Fragment) OS=Spinacia oleracea OX=3562 GN=SOVF_136840 PE=3 SV=1
TRINITY_DN69_c0_g1_i10	4548	75.46	0	0.49	0	0.34	0	-9.13102	tr|A0A0K9QA75|A0A0K9QA75_SPIOL Potassium transporter OS=Spinacia oleracea OX=3562 GN=SOVF_209220 PE=3 SV=1
TRINITY_DN7644_c0_g1_i9	573	75.49	0	5.54	0	3.82	0	-9.13102	tr|A0A0K9QTH3|A0A0K9QTH3_SPIOL Uncharacterized protein OS=Spinacia oleracea OX=3562 GN=SOVF_143360 PE=3 SV=1
TRINITY_DN10445_c0_g1_i12	2495	74.07	0	0.92	0	0.63	0	-9.11169	tr|A0A0K9RPP4|A0A0K9RPP4_SPIOL Uncharacterized protein OS=Spinacia oleracea OX=3562 GN=SOVF_042590 PE=4 SV=1
TRINITY_DN13076_c1_g1_i2	731	73.93	0	3.86	0	2.66	0	-9.11169	-
TRINITY_DN17723_c0_g1_i1	950	74.14	0	2.77	0	1.91	0	-9.11169	-
TRINITY_DN1962_c1_g1_i2	1563	74.47	0	1.54	0	1.06	0	-9.11169	tr|A0A0K9RCS5|A0A0K9RCS5_SPIOL Uncharacterized protein OS=Spinacia oleracea OX=3562 GN=SOVF_085970 PE=4 SV=1
TRINITY_DN19994_c0_g1_i3	5106	74.27	0	0.43	0	0.3	0	-9.11169	tr|A0A0K9QDS3|A0A0K9QDS3_SPIOL Uncharacterized protein (Fragment) OS=Spinacia oleracea OX=3562 GN=SOVF_190600 PE=4 SV=1
TRINITY_DN2098_c1_g1_i1	980	74	0	2.66	0	1.83	0	-9.11169	tr|A0A0K9QM90|A0A0K9QM90_SPIOL Uncharacterized protein OS=Spinacia oleracea OX=3562 GN=SOVF_168490 PE=4 SV=1
TRINITY_DN2358_c0_g1_i2	2067	74.01	0	1.12	0	0.77	0	-9.11169	tr|A0A0K9RYT6|A0A0K9RYT6_SPIOL Uncharacterized protein OS=Spinacia oleracea OX=3562 GN=SOVF_013520 PE=4 SV=1
TRINITY_DN842_c0_g1_i28	3314	73.5	0	0.67	0	0.46	0	-9.11169	tr|A0A0K9S3U4|A0A0K9S3U4_SPIOL Vacuolar cation/proton exchanger OS=Spinacia oleracea OX=3562 GN=SOVF_002360 PE=3 SV=1
TRINITY_DN8532_c0_g1_i2	3341	73.78	0	0.67	0	0.46	0	-9.11169	tr|A0A0K9RPZ6|A0A0K9RPZ6_SPIOL Uncharacterized protein OS=Spinacia oleracea OX=3562 GN=SOVF_047270 PE=4 SV=1
TRINITY_DN1018_c0_g1_i19	4715	72.73	0	0.46	0	0.32	0	-9.0921	tr|A0A0K9QY94|A0A0K9QY94_SPIOL Uncharacterized protein OS=Spinacia oleracea OX=3562 GN=SOVF_133120 PE=4 SV=1
TRINITY_DN1257_c0_g4_i1	2942	73.12	0.08	0.76	0	0.52	0	-9.0921	tr|A0A0K9R751|A0A0K9R751_SPIOL Uncharacterized protein OS=Spinacia oleracea OX=3562 GN=SOVF_099190 PE=4 SV=1
TRINITY_DN1570_c1_g1_i8	2101	72.75	0	1.08	0	0.75	0	-9.0921	tr|A0A0K9QNT4|A0A0K9QNT4_SPIOL Uncharacterized protein OS=Spinacia oleracea OX=3562 GN=SOVF_158470 PE=4 SV=1
TRINITY_DN5181_c0_g1_i1	2894	73.06	0	0.77	0	0.53	0	-9.0921	tr|A0A0K9QUM9|A0A0K9QUM9_SPIOL Uncharacterized protein OS=Spinacia oleracea OX=3562 GN=SOVF_146730 PE=4 SV=1
TRINITY_DN530_c0_g1_i13	2254	72.51	0	1	0	0.69	0	-9.0921	sp|P82162|RR10_SPIOL 30S ribosomal protein S10 alpha, chloroplastic OS=Spinacia oleracea OX=3562 GN=RPS10 PE=1 SV=2
TRINITY_DN5384_c0_g1_i12	1366	73.18	0	1.77	0	1.22	0	-9.0921	tr|A0A0K9QJV5|A0A0K9QJV5_SPIOL Uncharacterized protein (Fragment) OS=Spinacia oleracea OX=3562 GN=SOVF_175270 PE=3 SV=1
TRINITY_DN555_c0_g1_i1	392	73.46	0	10.05	0	6.93	0	-9.0921	-
TRINITY_DN11391_c0_g1_i9	2541	71.58	0	0.87	0	0.6	0	-9.07224	tr|A0A0K9QKK3|A0A0K9QKK3_SPIOL Uncharacterized protein OS=Spinacia oleracea OX=3562 GN=SOVF_168380 PE=4 SV=1
TRINITY_DN13598_c0_g1_i12	3387	72.13	0	0.64	0	0.44	0	-9.07224	tr|A0A0K9QIT1|A0A0K9QIT1_SPIOL Uncharacterized protein (Fragment) OS=Spinacia oleracea OX=3562 GN=SOVF_174480 PE=4 SV=1
TRINITY_DN13981_c0_g1_i12	3415	71.65	0	0.63	0	0.44	0	-9.07224	tr|A0A0K9RLU0|A0A0K9RLU0_SPIOL NADPH-dependent diflavin oxidoreductase 1 OS=Spinacia oleracea OX=3562 GN=SOVF_058230 PE=3 SV=1
TRINITY_DN15119_c0_g1_i3	2437	72.44	0	0.92	0	0.63	0	-9.07224	tr|A0A0K9S2W3|A0A0K9S2W3_SPIOL Bidirectional sugar transporter SWEET OS=Spinacia oleracea OX=3562 GN=SOVF_000830 PE=3 SV=1
TRINITY_DN2201_c0_g1_i19	3618	72.26	0	0.6	0	0.41	0	-9.07224	tr|A0A0K9RN08|A0A0K9RN08_SPIOL Uncharacterized protein OS=Spinacia oleracea OX=3562 GN=SOVF_048480 PE=4 SV=1
TRINITY_DN3711_c0_g1_i1	1734	72.38	0	1.33	0	0.92	0	-9.07224	tr|A0A0K9RWM9|A0A0K9RWM9_SPIOL Uncharacterized protein OS=Spinacia oleracea OX=3562 GN=SOVF_026600 PE=4 SV=1
TRINITY_DN5237_c1_g1_i3	1947	72.27	0	1.17	0	0.81	0	-9.07224	tr|A0A0K9Q981|A0A0K9Q981_SPIOL Uncharacterized protein (Fragment) OS=Spinacia oleracea OX=3562 GN=SOVF_211060 PE=4 SV=1
TRINITY_DN5382_c0_g1_i1	546	72	0	5.68	0	3.92	0	-9.07224	-
TRINITY_DN1000_c0_g1_i4	5909	70.61	0	0.35	0	0.24	0	-9.0521	tr|A0A0K9RBD5|A0A0K9RBD5_SPIOL Uncharacterized protein OS=Spinacia oleracea OX=3562 GN=SOVF_085770 PE=4 SV=1
TRINITY_DN10757_c0_g1_i4	2224	70.59	0	0.99	0	0.68	0	-9.0521	tr|A0A0K9QXV6|A0A0K9QXV6_SPIOL Casein kinase II subunit beta OS=Spinacia oleracea OX=3562 GN=SOVF_135920 PE=3 SV=1
TRINITY_DN115_c0_g1_i6	2268	70.73	0	0.97	0	0.67	0	-9.0521	tr|A0A0K9QT03|A0A0K9QT03_SPIOL Uncharacterized protein OS=Spinacia oleracea OX=3562 GN=SOVF_144880 PE=4 SV=1
TRINITY_DN1405_c0_g1_i2	2704	71.23	0	0.81	0	0.56	0	-9.0521	tr|A0A0K9QTJ2|A0A0K9QTJ2_SPIOL Uncharacterized protein OS=Spinacia oleracea OX=3562 GN=SOVF_149760 PE=4 SV=1
TRINITY_DN1781_c0_g1_i12	3012	71.38	0	0.72	0	0.5	0	-9.0521	tr|A0A0K9RMP6|A0A0K9RMP6_SPIOL Uncharacterized protein OS=Spinacia oleracea OX=3562 GN=SOVF_048880 PE=4 SV=1
TRINITY_DN1841_c0_g1_i2	522	71	0	6	0	4.14	0	-9.0521	-
TRINITY_DN3328_c0_g1_i2	521	70.92	0	6.01	0	4.15	0	-9.0521	tr|A0A0K9RBI0|A0A0K9RBI0_SPIOL Uncharacterized protein OS=Spinacia oleracea OX=3562 GN=SOVF_089720 PE=4 SV=1
TRINITY_DN4349_c0_g1_i7	1304	71.21	0	1.82	0	1.25	0	-9.0521	tr|A0A0K9QIV7|A0A0K9QIV7_SPIOL Uncharacterized protein OS=Spinacia oleracea OX=3562 GN=SOVF_174230 PE=4 SV=1
TRINITY_DN4718_c0_g2_i4	4304	70.91	0	0.49	0	0.34	0	-9.0521	tr|A0A0K9RN05|A0A0K9RN05_SPIOL Uncharacterized protein OS=Spinacia oleracea OX=3562 GN=SOVF_048250 PE=4 SV=1
TRINITY_DN4927_c0_g5_i4	3898	71.33	0	0.55	0	0.38	0	-9.0521	tr|A0A0K9R7B4|A0A0K9R7B4_SPIOL Uncharacterized protein OS=Spinacia oleracea OX=3562 GN=SOVF_103400 PE=4 SV=1
TRINITY_DN6471_c1_g1_i2	2126	70.73	0	1.04	0	0.72	0	-9.0521	tr|A0A0K9QEE2|A0A0K9QEE2_SPIOL Uncharacterized protein (Fragment) OS=Spinacia oleracea OX=3562 GN=SOVF_188530 PE=4 SV=1
TRINITY_DN79_c1_g1_i10	5818	70.53	0	0.36	0	0.25	0	-9.0521	tr|A0A0K9RKR3|A0A0K9RKR3_SPIOL Uncharacterized protein OS=Spinacia oleracea OX=3562 GN=SOVF_055530 PE=4 SV=1
TRINITY_DN9578_c0_g1_i2	637	71	0	4.48	0	3.09	0	-9.0521	-
TRINITY_DN1008_c1_g1_i3	2552	69.88	0	0.84	0	0.58	0	-9.03167	tr|A0A0K9R4V4|A0A0K9R4V4_SPIOL Uncharacterized protein OS=Spinacia oleracea OX=3562 GN=SOVF_106210 PE=4 SV=1
TRINITY_DN1089_c1_g1_i2	1096	70.32	0	2.2	0	1.52	0	-9.03167	tr|A0A0K9QTT1|A0A0K9QTT1_SPIOL Protein ROOT HAIR DEFECTIVE 3 homolog OS=Spinacia oleracea OX=3562 GN=SOVF_142190 PE=3 SV=1
TRINITY_DN12909_c0_g1_i9	853	69.99	0	2.99	0	2.06	0	-9.03167	-
TRINITY_DN1320_c0_g1_i8	6619	69.8	0	0.31	0	0.21	0	-9.03167	tr|A0A0J8B7H3|A0A0J8B7H3_BETVU Uncharacterized protein OS=Beta vulgaris subsp. vulgaris OX=3555 GN=BVRB_003960 PE=4 SV=1
TRINITY_DN244_c0_g1_i3	2924	69.64	0	0.73	0	0.5	0	-9.03167	tr|A0A0K9QSE5|A0A0K9QSE5_SPIOL Uncharacterized protein OS=Spinacia oleracea OX=3562 GN=SOVF_147050 PE=4 SV=1
TRINITY_DN3260_c0_g1_i6	3052	69.5	0	0.69	0	0.48	0	-9.03167	tr|A0A0K9R9P3|A0A0K9R9P3_SPIOL Uncharacterized protein OS=Spinacia oleracea OX=3562 GN=SOVF_095670 PE=4 SV=1
TRINITY_DN3936_c0_g1_i1	5647	70.06	0	0.37	0	0.25	0	-9.03167	tr|A0A0K9RYF5|A0A0K9RYF5_SPIOL Acyl-coenzyme A oxidase OS=Spinacia oleracea OX=3562 GN=SOVF_014550 PE=3 SV=1
TRINITY_DN5144_c0_g1_i1	2302	70.06	0	0.95	0	0.65	0	-9.03167	-
TRINITY_DN7119_c0_g1_i3	522	69.74	0	5.89	0	4.06	0	-9.03167	-
TRINITY_DN751_c0_g3_i8	251	69.69	0	26.12	0	18.01	0	-9.03167	-
TRINITY_DN814_c0_g1_i12	2506	70.06	0	0.86	0	0.59	0	-9.03167	tr|A0A0K9QD25|A0A0K9QD25_SPIOL Uncharacterized protein OS=Spinacia oleracea OX=3562 GN=SOVF_192840 PE=4 SV=1
TRINITY_DN853_c0_g1_i7	3813	70.02	0	0.55	0	0.38	0	-9.03167	tr|A0A0K9QCE3|A0A0K9QCE3_SPIOL Uncharacterized protein OS=Spinacia oleracea OX=3562 GN=SOVF_200450 PE=4 SV=1
TRINITY_DN9039_c0_g1_i3	345	69.7	0	12.23	0	8.43	0	-9.03167	-
TRINITY_DN1101_c11_g1_i15	751	68.56	0	3.46	0	2.38	0	-9.01095	-
TRINITY_DN1175_c0_g1_i1	974	68.98	0	2.49	0	1.72	0	-9.01095	tr|A0A0K9Q825|A0A0K9Q825_SPIOL Uncharacterized protein OS=Spinacia oleracea OX=3562 GN=SOVF_216570 PE=4 SV=1
TRINITY_DN1353_c1_g1_i3	2068	69.3	0	1.05	0	0.72	0	-9.01095	tr|A0A0K9REV3|A0A0K9REV3_SPIOL Uncharacterized protein OS=Spinacia oleracea OX=3562 GN=SOVF_074670 PE=4 SV=1
TRINITY_DN1412_c0_g2_i3	1683	69.34	0	1.32	0	0.91	0	-9.01095	tr|A0A0J8E455|A0A0J8E455_BETVU Uncharacterized protein OS=Beta vulgaris subsp. vulgaris OX=3555 GN=BVRB_5g123190 PE=4 SV=1
TRINITY_DN1486_c0_g1_i23	1803	68.74	0	1.21	0	0.84	0	-9.01095	tr|A0A0K9QE44|A0A0K9QE44_SPIOL Uncharacterized protein OS=Spinacia oleracea OX=3562 GN=SOVF_196350 PE=4 SV=1
TRINITY_DN2014_c0_g1_i13	3027	69.24	0	0.7	0	0.48	0	-9.01095	tr|A0A0J8BWI7|A0A0J8BWI7_BETVU Uncharacterized protein OS=Beta vulgaris subsp. vulgaris OX=3555 GN=BVRB_7g165050 PE=3 SV=1
TRINITY_DN2203_c1_g1_i6	382	68.77	0	9.88	0	6.81	0	-9.01095	-
TRINITY_DN3924_c0_g1_i7	1715	69.13	0	1.29	0	0.89	0	-9.01095	tr|A0A0K9R015|A0A0K9R015_SPIOL Uncharacterized protein (Fragment) OS=Spinacia oleracea OX=3562 GN=SOVF_122240 PE=4 SV=1
TRINITY_DN4975_c0_g1_i10	2036	68.58	0	1.06	0	0.73	0	-9.01095	tr|A0A0K9QBY2|A0A0K9QBY2_SPIOL Uncharacterized protein OS=Spinacia oleracea OX=3562 GN=SOVF_203290 PE=4 SV=1
TRINITY_DN5543_c1_g2_i8	1840	69.36	0	1.2	0	0.83	0	-9.01095	tr|A0A0K9RC00|A0A0K9RC00_SPIOL Uncharacterized protein OS=Spinacia oleracea OX=3562 GN=SOVF_090270 PE=4 SV=1
TRINITY_DN58_c0_g3_i4	1406	68.52	0	1.6	0	1.1	0	-9.01095	tr|A0A0K9RKI7|A0A0K9RKI7_SPIOL Uncharacterized protein OS=Spinacia oleracea OX=3562 GN=SOVF_061530 PE=4 SV=1
TRINITY_DN5977_c0_g1_i7	1405	69.47	0	1.63	0	1.12	0	-9.01095	tr|A0A0K9R5V2|A0A0K9R5V2_SPIOL Uncharacterized protein OS=Spinacia oleracea OX=3562 GN=SOVF_103210 PE=4 SV=1
TRINITY_DN689_c0_g1_i11	1544	68.76	0	1.44	0	1	0	-9.01095	tr|A0A0K9RK53|A0A0K9RK53_SPIOL S-acyltransferase OS=Spinacia oleracea OX=3562 GN=SOVF_057410 PE=3 SV=1
TRINITY_DN14270_c0_g1_i1	1078	68	0	2.17	0	1.5	0	-8.98993	tr|A0A0K9QZU7|A0A0K9QZU7_SPIOL Hexosyltransferase OS=Spinacia oleracea OX=3562 GN=SOVF_122730 PE=3 SV=1
TRINITY_DN16360_c0_g1_i10	2828	68.32	0	0.74	0	0.51	0	-8.98993	tr|A0A0K9R942|A0A0K9R942_SPIOL Uncharacterized protein OS=Spinacia oleracea OX=3562 GN=SOVF_097740 PE=4 SV=1
TRINITY_DN1660_c0_g1_i3	2987	68.17	0	0.69	0	0.48	0	-8.98993	tr|A0A0J8E6R9|A0A0J8E6R9_BETVU Uncharacterized protein OS=Beta vulgaris subsp. vulgaris OX=3555 GN=BVRB_3g067910 PE=4 SV=1
TRINITY_DN2503_c0_g1_i8	3468	68.09	0	0.59	0	0.41	0	-8.98993	tr|A0A0K9S1J2|A0A0K9S1J2_SPIOL Uncharacterized protein OS=Spinacia oleracea OX=3562 GN=SOVF_010090 PE=4 SV=1
TRINITY_DN2530_c0_g4_i2	2865	67.59	0	0.72	0	0.5	0	-8.98993	tr|A0A0J8CGI3|A0A0J8CGI3_BETVU Uncharacterized protein OS=Beta vulgaris subsp. vulgaris OX=3555 GN=BVRB_5g111270 PE=4 SV=1
TRINITY_DN3252_c0_g2_i1	3972	68.47	0	0.52	0	0.36	0	-8.98993	tr|F4NCG1|F4NCG1_BETVU Uncharacterized protein OS=Beta vulgaris subsp. vulgaris OX=3555 PE=4 SV=1
TRINITY_DN4173_c0_g1_i1	2737	67.63	0	0.76	0	0.52	0	-8.98993	tr|A0A0K9QZ54|A0A0K9QZ54_SPIOL Uncharacterized protein OS=Spinacia oleracea OX=3562 GN=SOVF_131670 PE=4 SV=1
TRINITY_DN6850_c0_g1_i3	7101	68.15	0	0.28	0	0.19	0	-8.98993	tr|A0A0J8CX06|A0A0J8CX06_BETVU Uncharacterized protein OS=Beta vulgaris subsp. vulgaris OX=3555 GN=BVRB_2g031660 PE=4 SV=1
TRINITY_DN715_c0_g1_i1	1989	67.99	0	1.08	0	0.74	0	-8.98993	tr|A0A0K9R3E7|A0A0K9R3E7_SPIOL Uncharacterized protein OS=Spinacia oleracea OX=3562 GN=SOVF_116770 PE=4 SV=1
TRINITY_DN11278_c0_g1_i5	4161	66.52	0.25	0.48	0	0.33	0	-8.9686	tr|A0A0K9R4X5|A0A0K9R4X5_SPIOL Probable alanine--tRNA ligase, chloroplastic OS=Spinacia oleracea OX=3562 GN=SOVF_106470 PE=3 SV=1
TRINITY_DN11438_c0_g1_i2	2176	67.46	0	0.97	0	0.67	0	-8.9686	tr|A0A0K9RB69|A0A0K9RB69_SPIOL Protein DETOXIFICATION OS=Spinacia oleracea OX=3562 GN=SOVF_092890 PE=3 SV=1
TRINITY_DN1486_c0_g1_i2	2848	66.51	0	0.71	0	0.49	0	-8.9686	tr|A0A0K9QE44|A0A0K9QE44_SPIOL Uncharacterized protein OS=Spinacia oleracea OX=3562 GN=SOVF_196350 PE=4 SV=1
TRINITY_DN2398_c0_g1_i6	4784	66.95	0	0.42	0	0.29	0	-8.9686	tr|A0A0K9RF05|A0A0K9RF05_SPIOL Uncharacterized protein OS=Spinacia oleracea OX=3562 GN=SOVF_079870 PE=4 SV=1
TRINITY_DN3020_c0_g1_i16	3812	66.98	0	0.53	0	0.36	0	-8.9686	tr|A0A0K9RBX9|A0A0K9RBX9_SPIOL Uncharacterized protein OS=Spinacia oleracea OX=3562 GN=SOVF_088380 PE=4 SV=1
TRINITY_DN3192_c0_g1_i2	2849	67.31	0	0.72	0	0.5	0	-8.9686	tr|A0A0K9RHP6|A0A0K9RHP6_SPIOL Uncharacterized protein OS=Spinacia oleracea OX=3562 GN=SOVF_065590 PE=4 SV=1
TRINITY_DN396_c0_g1_i1	1873	67.03	0	1.13	0	0.78	0	-8.9686	tr|A0A0K9RVF8|A0A0K9RVF8_SPIOL Uncharacterized protein OS=Spinacia oleracea OX=3562 GN=SOVF_024180 PE=3 SV=1
TRINITY_DN4322_c0_g1_i6	4948	66.8	0	0.4	0	0.28	0	-8.9686	tr|A0A1B3TNU5|A0A1B3TNU5_MIRJA RNaseH OS=Mirabilis jalapa OX=3538 PE=4 SV=1
TRINITY_DN5514_c0_g2_i4	3698	66.67	0	0.54	0	0.37	0	-8.9686	tr|A0A0K9QK85|A0A0K9QK85_SPIOL Uncharacterized protein OS=Spinacia oleracea OX=3562 GN=SOVF_174980 PE=4 SV=1
TRINITY_DN5680_c0_g5_i1	1604	66.55	0	1.34	0	0.92	0	-8.9686	tr|A0A0K9RGE4|A0A0K9RGE4_SPIOL Defective in cullin neddylation protein OS=Spinacia oleracea OX=3562 GN=SOVF_069600 PE=4 SV=1
TRINITY_DN6425_c0_g2_i2	667	66.57	0	3.94	0	2.72	0	-8.9686	-
TRINITY_DN6764_c0_g1_i5	550	67.04	0	5.23	0	3.61	0	-8.9686	tr|A0A0J8B4G7|A0A0J8B4G7_BETVU Uncharacterized protein OS=Beta vulgaris subsp. vulgaris OX=3555 GN=BVRB_015880 PE=4 SV=1
TRINITY_DN730_c1_g1_i1	290	67.08	0	17.28	0	11.92	0	-8.9686	-
TRINITY_DN806_c0_g1_i5	1786	67.02	0	1.2	0	0.82	0	-8.9686	tr|A0A0C5AZ91|A0A0C5AZ91_9CARY Acyl carrier protein OS=Suaeda glauca OX=397272 PE=2 SV=1
TRINITY_DN9443_c0_g1_i2	930	66.55	0	2.55	0	1.76	0	-8.9686	tr|A0A0J8B7C3|A0A0J8B7C3_BETVU Uncharacterized protein OS=Beta vulgaris subsp. vulgaris OX=3555 GN=BVRB_005900 PE=4 SV=1
TRINITY_DN10393_c0_g1_i8	1175	66.25	0	1.91	0	1.32	0	-8.94695	tr|A0A0K9RMT2|A0A0K9RMT2_SPIOL Uncharacterized protein OS=Spinacia oleracea OX=3562 GN=SOVF_048910 PE=3 SV=1
TRINITY_DN1584_c0_g3_i2	1962	65.62	0	1.05	0	0.73	0	-8.94695	tr|A0A0K9RNC7|A0A0K9RNC7_SPIOL Uncharacterized protein OS=Spinacia oleracea OX=3562 GN=SOVF_047000 PE=4 SV=1
TRINITY_DN15869_c0_g1_i4	1326	65.95	0	1.65	0	1.14	0	-8.94695	tr|A0A0J8E596|A0A0J8E596_BETVU Uncharacterized protein OS=Beta vulgaris subsp. vulgaris OX=3555 GN=BVRB_4g093090 PE=4 SV=1
TRINITY_DN3498_c1_g1_i1	2782	65.69	0	0.72	0	0.5	0	-8.94695	tr|A0A0K9RU22|A0A0K9RU22_SPIOL Formin-like protein OS=Spinacia oleracea OX=3562 GN=SOVF_035520 PE=3 SV=1
TRINITY_DN3753_c0_g2_i11	2857	66.27	0	0.71	0	0.49	0	-8.94695	tr|A0A0K9R287|A0A0K9R287_SPIOL Uncharacterized protein OS=Spinacia oleracea OX=3562 GN=SOVF_121680 PE=4 SV=1
TRINITY_DN3957_c1_g1_i12	4243	65.97	0	0.46	0	0.32	0	-8.94695	tr|A0A0K9QSJ7|A0A0K9QSJ7_SPIOL Uncharacterized protein OS=Spinacia oleracea OX=3562 GN=SOVF_146580 PE=4 SV=1
TRINITY_DN4727_c0_g1_i3	2756	65.83	0	0.73	0	0.5	0	-8.94695	tr|A0A0K9RHK7|A0A0K9RHK7_SPIOL Uncharacterized protein OS=Spinacia oleracea OX=3562 GN=SOVF_065790 PE=4 SV=1
TRINITY_DN7644_c0_g1_i13	1193	65.79	0	1.86	0	1.28	0	-8.94695	tr|A0A0K9QTH3|A0A0K9QTH3_SPIOL Uncharacterized protein OS=Spinacia oleracea OX=3562 GN=SOVF_143360 PE=3 SV=1
TRINITY_DN798_c0_g1_i1	2323	66.38	0	0.89	0	0.61	0	-8.94695	tr|A0A0K9RHC1|A0A0K9RHC1_SPIOL S-acyltransferase OS=Spinacia oleracea OX=3562 GN=SOVF_066470 PE=3 SV=1
TRINITY_DN8014_c0_g1_i8	2198	65.57	0	0.93	0	0.64	0	-8.94695	-
TRINITY_DN10415_c2_g3_i10	1313	65.33	0	1.65	0	1.14	0	-8.92497	tr|A0A0K9S311|A0A0K9S311_SPIOL Reticulon-like protein OS=Spinacia oleracea OX=3562 GN=SOVF_005310 PE=4 SV=1
TRINITY_DN1718_c0_g1_i20	2403	65.34	0	0.84	0	0.58	0	-8.92497	tr|A0A0J8B3X6|A0A0J8B3X6_BETVU Uncharacterized protein OS=Beta vulgaris subsp. vulgaris OX=3555 GN=BVRB_003990 PE=3 SV=1
TRINITY_DN1971_c0_g3_i1	3211	64.8	0	0.61	0	0.42	0	-8.92497	tr|A0A0K9RLQ4|A0A0K9RLQ4_SPIOL Uncharacterized protein OS=Spinacia oleracea OX=3562 GN=SOVF_052400 PE=4 SV=1
TRINITY_DN2377_c0_g1_i2	4038	65.18	0.17	0.48	0	0.33	0	-8.92497	tr|A0A0J8BRW2|A0A0J8BRW2_BETVU Uncharacterized protein OS=Beta vulgaris subsp. vulgaris OX=3555 GN=BVRB_8g187660 PE=4 SV=1
TRINITY_DN3887_c0_g1_i5	1504	65.02	0	1.41	0	0.97	0	-8.92497	tr|A0A0K9QZ72|A0A0K9QZ72_SPIOL Uncharacterized protein OS=Spinacia oleracea OX=3562 GN=SOVF_124810 PE=4 SV=1
TRINITY_DN6448_c0_g3_i7	2597	64.52	0	0.76	0	0.53	0	-8.92497	tr|A0A0K9RJ65|A0A0K9RJ65_SPIOL Uncharacterized protein OS=Spinacia oleracea OX=3562 GN=SOVF_066480 PE=4 SV=1
TRINITY_DN7142_c0_g1_i1	345	65	0	11.4	0	7.86	0	-8.92497	-
TRINITY_DN7674_c0_g1_i9	2236	64.51	0	0.9	0	0.62	0	-8.92497	tr|A0A0K9RIL4|A0A0K9RIL4_SPIOL Uncharacterized protein (Fragment) OS=Spinacia oleracea OX=3562 GN=SOVF_067710 PE=3 SV=1
TRINITY_DN1020_c0_g1_i1	1749	63.99	0	1.17	0	0.81	0	-8.90265	tr|A0A0K9QY24|A0A0K9QY24_SPIOL Uncharacterized protein OS=Spinacia oleracea OX=3562 GN=SOVF_128290 PE=4 SV=1
TRINITY_DN11485_c0_g2_i4	937	64.44	0	2.45	0	1.69	0	-8.90265	tr|T1DFB3|T1DFB3_SILLA Cytochrome P450 71A25 (Fragment) OS=Silene latifolia OX=37657 GN=CYP71A25 PE=2 SV=1
TRINITY_DN1501_c1_g1_i18	2862	64.29	0	0.69	0	0.47	0	-8.90265	tr|A0A0K9QP54|A0A0K9QP54_SPIOL Uncharacterized protein (Fragment) OS=Spinacia oleracea OX=3562 GN=SOVF_156960 PE=4 SV=1
TRINITY_DN1675_c0_g1_i15	4958	63.59	0	0.38	0	0.26	0	-8.90265	tr|A0A0K9RU18|A0A0K9RU18_SPIOL Uncharacterized protein OS=Spinacia oleracea OX=3562 GN=SOVF_028510 PE=4 SV=1
TRINITY_DN2082_c0_g1_i3	2484	63.74	0	0.79	0	0.55	0	-8.90265	tr|A0A0K9RF00|A0A0K9RF00_SPIOL Beta-galactosidase OS=Spinacia oleracea OX=3562 GN=SOVF_073980 PE=3 SV=1
TRINITY_DN2157_c0_g1_i7	1432	63.52	0.18	1.45	0	1	0	-8.90265	tr|A0A0K9QDA3|A0A0K9QDA3_SPIOL Uncharacterized protein OS=Spinacia oleracea OX=3562 GN=SOVF_192310 PE=4 SV=1
TRINITY_DN2905_c0_g1_i5	3906	63.69	0	0.49	0	0.34	0	-8.90265	tr|A0A0K9RS78|A0A0K9RS78_SPIOL Uncharacterized protein OS=Spinacia oleracea OX=3562 GN=SOVF_041380 PE=4 SV=1
TRINITY_DN3011_c0_g1_i3	2050	64.22	0	0.98	0	0.68	0	-8.90265	tr|C7DYC4|C7DYC4_BETVU Plasma membrane intrinsic protein PIP1;1 OS=Beta vulgaris subsp. vulgaris OX=3555 PE=2 SV=1
TRINITY_DN4588_c0_g2_i20	4084	64.4	0	0.47	0	0.33	0	-8.90265	tr|A0A0K9QYG2|A0A0K9QYG2_SPIOL Uncharacterized protein (Fragment) OS=Spinacia oleracea OX=3562 GN=SOVF_131890 PE=4 SV=1
TRINITY_DN4807_c0_g1_i6	5378	63.85	0.23	0.35	0	0.24	0	-8.90265	tr|A0A0K9QI05|A0A0K9QI05_SPIOL Uncharacterized protein OS=Spinacia oleracea OX=3562 GN=SOVF_176840 PE=4 SV=1
TRINITY_DN7602_c0_g1_i1	1390	64.18	0	1.52	0	1.05	0	-8.90265	tr|A0A0J8B4R8|A0A0J8B4R8_BETVU Uncharacterized protein OS=Beta vulgaris subsp. vulgaris OX=3555 GN=BVRB_003270 PE=3 SV=1
TRINITY_DN9853_c0_g1_i11	2097	63.52	0	0.95	0	0.65	0	-8.90265	tr|A0A0K9RWT5|A0A0K9RWT5_SPIOL Glycosyltransferase OS=Spinacia oleracea OX=3562 GN=SOVF_025340 PE=3 SV=1
TRINITY_DN11076_c0_g1_i3	521	62.86	0	5.33	0	3.67	0	-8.87997	-
TRINITY_DN11406_c0_g1_i1	2400	63.12	0	0.81	0	0.56	0	-8.87997	tr|A0A1B3TNU5|A0A1B3TNU5_MIRJA RNaseH OS=Mirabilis jalapa OX=3538 PE=4 SV=1
TRINITY_DN1715_c0_g3_i3	2099	63.37	0.02	0.95	0	0.65	0	-8.87997	tr|A0A0K9Q7P3|A0A0K9Q7P3_SPIOL Uncharacterized protein (Fragment) OS=Spinacia oleracea OX=3562 GN=SOVF_216130 PE=4 SV=1
TRINITY_DN3058_c0_g1_i16	4544	62.52	0	0.41	0	0.28	0	-8.87997	tr|A0A0K9RXJ1|A0A0K9RXJ1_SPIOL Uncharacterized protein OS=Spinacia oleracea OX=3562 GN=SOVF_018410 PE=4 SV=1
TRINITY_DN326_c0_g1_i7	1984	62.94	0.21	1	0	0.69	0	-8.87997	tr|A0A0J8E5X4|A0A0J8E5X4_BETVU Uncharacterized protein OS=Beta vulgaris subsp. vulgaris OX=3555 GN=BVRB_3g070480 PE=4 SV=1
TRINITY_DN4005_c0_g4_i1	834	63.34	0	2.78	0	1.92	0	-8.87997	-
TRINITY_DN489_c0_g1_i5	3074	62.92	0.07	0.62	0	0.43	0	-8.87997	tr|A0A0K9RS48|A0A0K9RS48_SPIOL Uncharacterized protein (Fragment) OS=Spinacia oleracea OX=3562 GN=SOVF_041550 PE=4 SV=1
TRINITY_DN4951_c0_g3_i4	5971	62.55	0	0.31	0	0.21	0	-8.87997	tr|A0A0J8CQC9|A0A0J8CQC9_BETVU Uncharacterized protein OS=Beta vulgaris subsp. vulgaris OX=3555 GN=BVRB_4g075870 PE=4 SV=1
TRINITY_DN495_c0_g1_i17	4581	63.32	0	0.41	0	0.28	0	-8.87997	tr|A0A0K9QRY5|A0A0K9QRY5_SPIOL Uncharacterized protein OS=Spinacia oleracea OX=3562 GN=SOVF_153470 PE=4 SV=1
TRINITY_DN5041_c0_g1_i7	1615	62.74	0	1.25	0	0.86	0	-8.87997	tr|A0A0K9QCJ6|A0A0K9QCJ6_SPIOL Uncharacterized protein OS=Spinacia oleracea OX=3562 GN=SOVF_194530 PE=4 SV=1
TRINITY_DN5483_c0_g1_i23	4124	62.71	0	0.45	0	0.31	0	-8.87997	tr|G9FIF2|G9FIF2_BETVU Uncharacterized protein OS=Beta vulgaris OX=161934 PE=4 SV=1
TRINITY_DN5497_c1_g1_i14	794	62.62	0	2.93	0	2.02	0	-8.87997	tr|A0A0K9QDC4|A0A0K9QDC4_SPIOL Uncharacterized protein (Fragment) OS=Spinacia oleracea OX=3562 GN=SOVF_192000 PE=4 SV=1
TRINITY_DN9032_c1_g1_i2	2561	62.54	0	0.75	0	0.52	0	-8.87997	-
TRINITY_DN17662_c0_g1_i5	3726	62.04	0	0.5	0	0.35	0	-8.85694	tr|A0A0K9Q769|A0A0K9Q769_SPIOL Uncharacterized protein OS=Spinacia oleracea OX=3562 GN=SOVF_213340 PE=4 SV=1
TRINITY_DN2040_c0_g2_i8	2705	62.44	0	0.71	0	0.49	0	-8.85694	tr|A0A0K9QHW5|A0A0K9QHW5_SPIOL Alpha-mannosidase OS=Spinacia oleracea OX=3562 GN=SOVF_177470 PE=3 SV=1
TRINITY_DN2262_c0_g1_i9	1060	62.46	0	2.04	0	1.4	0	-8.85694	tr|A0A0K9QWU4|A0A0K9QWU4_SPIOL Uncharacterized protein OS=Spinacia oleracea OX=3562 GN=SOVF_139200 PE=4 SV=1
TRINITY_DN2587_c0_g1_i8	1962	61.9	0	0.99	0	0.69	0	-8.85694	tr|A0A0K9R788|A0A0K9R788_SPIOL Uncharacterized protein OS=Spinacia oleracea OX=3562 GN=SOVF_098830 PE=4 SV=1
TRINITY_DN3562_c0_g3_i3	1122	62.18	0	1.89	0	1.31	0	-8.85694	tr|P93103|P93103_OXYRB Cyclin-D like protein OS=Oxybasis rubra OX=3560 GN=cycD1 PE=2 SV=1
TRINITY_DN5200_c1_g3_i1	5337	61.88	0	0.34	0	0.24	0	-8.85694	tr|A0A0K9QD87|A0A0K9QD87_SPIOL Uncharacterized protein OS=Spinacia oleracea OX=3562 GN=SOVF_192280 PE=3 SV=1
TRINITY_DN54616_c0_g1_i1	2690	62	0	0.71	0	0.49	0	-8.85694	tr|E2DMZ5|E2DMZ5_BETVU Uncharacterized protein OS=Beta vulgaris OX=161934 PE=4 SV=1
TRINITY_DN5713_c0_g1_i2	3266	61.63	0	0.57	0	0.39	0	-8.85694	tr|A0A0K9RJT9|A0A0K9RJT9_SPIOL Uncharacterized protein OS=Spinacia oleracea OX=3562 GN=SOVF_064680 PE=4 SV=1
TRINITY_DN65371_c0_g1_i1	726	62	0	3.27	0	2.25	0	-8.85694	tr|C5J3U0|C5J3U0_CHEAL Profilin (Fragment) OS=Chenopodium album OX=3559 PE=2 SV=1
TRINITY_DN8246_c0_g1_i24	674	62.02	0	3.62	0	2.49	0	-8.85694	-
TRINITY_DN8956_c0_g1_i2	1542	62.17	0	1.31	0	0.9	0	-8.85694	tr|F4NCG3|F4NCG3_BETVU Uncharacterized protein OS=Beta vulgaris subsp. vulgaris OX=3555 PE=4 SV=1
TRINITY_DN9464_c0_g1_i2	3143	62.2	0	0.6	0	0.41	0	-8.85694	tr|A0A0J8B707|A0A0J8B707_BETVU Uncharacterized protein OS=Beta vulgaris subsp. vulgaris OX=3555 GN=BVRB_8g199690 PE=4 SV=1
TRINITY_DN11976_c0_g1_i13	4995	61.06	0	0.36	0	0.25	0	-8.83353	tr|A0A0K9S1Q5|A0A0K9S1Q5_SPIOL Uncharacterized protein OS=Spinacia oleracea OX=3562 GN=SOVF_009180 PE=4 SV=1
TRINITY_DN150_c1_g1_i4	918	61.31	0	2.39	0	1.65	0	-8.83353	-
TRINITY_DN1910_c0_g1_i1	2226	61.05	0.42	0.85	0.01	0.59	0	-8.83353	tr|A0A0J8CKN3|A0A0J8CKN3_BETVU Uncharacterized protein OS=Beta vulgaris subsp. vulgaris OX=3555 GN=BVRB_4g090990 PE=3 SV=1
TRINITY_DN2344_c0_g1_i1	3033	61.05	0	0.61	0	0.42	0	-8.83353	tr|A0A0K9R2X3|A0A0K9R2X3_SPIOL Uncharacterized protein OS=Spinacia oleracea OX=3562 GN=SOVF_112680 PE=4 SV=1
TRINITY_DN254_c0_g2_i14	2908	61.24	0.14	0.64	0	0.44	0	-8.83353	tr|A0A0K9R3W5|A0A0K9R3W5_SPIOL Uncharacterized protein OS=Spinacia oleracea OX=3562 GN=SOVF_109690 PE=4 SV=1
TRINITY_DN2732_c0_g1_i13	1763	61.18	0.06	1.11	0	0.76	0	-8.83353	tr|A0A0K9QRF1|A0A0K9QRF1_SPIOL Uncharacterized protein OS=Spinacia oleracea OX=3562 GN=SOVF_155090 PE=3 SV=1
TRINITY_DN28651_c0_g1_i4	2964	61.31	0	0.63	0	0.43	0	-8.83353	tr|A0A0K9RV93|A0A0K9RV93_SPIOL Uncharacterized protein OS=Spinacia oleracea OX=3562 GN=SOVF_030470 PE=4 SV=1
TRINITY_DN3488_c1_g1_i5	2484	61.1	0	0.76	0	0.52	0	-8.83353	tr|A0A0K9RJE0|A0A0K9RJE0_SPIOL Pectinesterase OS=Spinacia oleracea OX=3562 GN=SOVF_060080 PE=4 SV=1
TRINITY_DN3508_c3_g1_i6	1627	61.1	0	1.21	0	0.83	0	-8.83353	tr|A0A0K9QJD1|A0A0K9QJD1_SPIOL WAT1-related protein OS=Spinacia oleracea OX=3562 GN=SOVF_172670 PE=3 SV=1
TRINITY_DN3633_c0_g1_i5	4460	60.94	0	0.41	0	0.28	0	-8.83353	tr|A0A0K9RQR2|A0A0K9RQR2_SPIOL RING-type E3 ubiquitin transferase OS=Spinacia oleracea OX=3562 GN=SOVF_045050 PE=4 SV=1
TRINITY_DN3937_c1_g1_i1	346	61	0	10.64	0	7.33	0	-8.83353	-
TRINITY_DN5073_c0_g1_i16	5476	60.63	0	0.33	0	0.23	0	-8.83353	tr|A0A0J8E2U9|A0A0J8E2U9_BETVU Phospholipid-transporting ATPase OS=Beta vulgaris subsp. vulgaris OX=3555 GN=BVRB_5g127060 PE=3 SV=1
TRINITY_DN5926_c0_g1_i14	2944	61.22	0	0.63	0	0.44	0	-8.83353	tr|A0A0K9RI43|A0A0K9RI43_SPIOL Uncharacterized protein OS=Spinacia oleracea OX=3562 GN=SOVF_064450 PE=4 SV=1
TRINITY_DN6668_c0_g2_i5	2154	61.08	0.01	0.89	0	0.61	0	-8.83353	tr|A0A0K9RJ13|A0A0K9RJ13_SPIOL Uncharacterized protein OS=Spinacia oleracea OX=3562 GN=SOVF_066230 PE=4 SV=1
TRINITY_DN7400_c0_g1_i6	2467	60.78	0.03	0.76	0	0.52	0	-8.83353	tr|A0A0K9RSY7|A0A0K9RSY7_SPIOL Uncharacterized protein OS=Spinacia oleracea OX=3562 GN=SOVF_032790 PE=3 SV=1
TRINITY_DN754_c0_g1_i2	413	61.48	0	7.65	0	5.28	0	-8.83353	-
TRINITY_DN7618_c0_g1_i1	4574	60.56	0	0.39	0	0.27	0	-8.83353	tr|A0A0K9R670|A0A0K9R670_SPIOL Uncharacterized protein OS=Spinacia oleracea OX=3562 GN=SOVF_106780 PE=4 SV=1
TRINITY_DN7965_c0_g1_i12	3419	61.17	0	0.54	0	0.37	0	-8.83353	tr|A0A0K9R8V5|A0A0K9R8V5_SPIOL Uncharacterized protein OS=Spinacia oleracea OX=3562 GN=SOVF_093830 PE=4 SV=1
TRINITY_DN8946_c0_g1_i7	292	60.98	0	15.46	0	10.66	0	-8.83353	-
TRINITY_DN1060_c0_g1_i9	2632	59.78	0	0.7	0	0.48	0	-8.80974	tr|A0A0J8B3M0|A0A0J8B3M0_BETVU Uncharacterized protein OS=Beta vulgaris subsp. vulgaris OX=3555 GN=BVRB_006940 PE=4 SV=1
TRINITY_DN106_c1_g1_i6	2535	59.92	0	0.73	0	0.5	0	-8.80974	tr|A0A0K9QPF4|A0A0K9QPF4_SPIOL Uncharacterized protein OS=Spinacia oleracea OX=3562 GN=SOVF_156370 PE=4 SV=1
TRINITY_DN12043_c0_g1_i4	1239	59.85	0	1.62	0	1.12	0	-8.80974	-
TRINITY_DN14017_c0_g1_i11	2112	59.56	0.48	0.88	0.01	0.61	0	-8.80974	tr|A0A0K9QC93|A0A0K9QC93_SPIOL Uncharacterized protein OS=Spinacia oleracea OX=3562 GN=SOVF_195580 PE=4 SV=1
TRINITY_DN18518_c0_g1_i1	851	60	0	2.57	0	1.77	0	-8.80974	-
TRINITY_DN1920_c0_g1_i3	2232	59.61	0	0.83	0	0.57	0	-8.80974	tr|A0A0K9QU82|A0A0K9QU82_SPIOL Uncharacterized protein OS=Spinacia oleracea OX=3562 GN=SOVF_140840 PE=4 SV=1
TRINITY_DN2154_c0_g1_i6	5192	59.88	0	0.34	0	0.24	0	-8.80974	tr|A0A0K9RKJ1|A0A0K9RKJ1_SPIOL Uncharacterized protein OS=Spinacia oleracea OX=3562 GN=SOVF_056100 PE=4 SV=1
TRINITY_DN2379_c0_g2_i8	1841	59.66	0	1.03	0	0.71	0	-8.80974	tr|A0A0K9RJT6|A0A0K9RJT6_SPIOL Uncharacterized protein OS=Spinacia oleracea OX=3562 GN=SOVF_063950 PE=4 SV=1
TRINITY_DN376_c1_g1_i3	947	60.35	0	2.26	0	1.56	0	-8.80974	tr|A0A0K9RSH5|A0A0K9RSH5_SPIOL Uncharacterized protein OS=Spinacia oleracea OX=3562 GN=SOVF_033660 PE=4 SV=1
TRINITY_DN5618_c0_g2_i10	3087	60.5	0.12	0.6	0	0.41	0	-8.80974	tr|A0A0K9Q9A8|A0A0K9Q9A8_SPIOL Uncharacterized protein OS=Spinacia oleracea OX=3562 GN=SOVF_205350 PE=4 SV=1
TRINITY_DN5780_c1_g1_i12	2361	60.46	0	0.79	0	0.55	0	-8.80974	tr|A0A0K9R2J5|A0A0K9R2J5_SPIOL Uncharacterized protein (Fragment) OS=Spinacia oleracea OX=3562 GN=SOVF_114190 PE=4 SV=1
TRINITY_DN5793_c0_g1_i28	1562	59.88	0	1.24	0	0.86	0	-8.80974	tr|A0A0K9QUW4|A0A0K9QUW4_SPIOL Uncharacterized protein OS=Spinacia oleracea OX=3562 GN=SOVF_138480 PE=4 SV=1
TRINITY_DN7485_c0_g1_i18	1652	60.45	0	1.18	0	0.81	0	-8.80974	tr|A0A0K9RY23|A0A0K9RY23_SPIOL Uncharacterized protein OS=Spinacia oleracea OX=3562 GN=SOVF_016570 PE=3 SV=1
TRINITY_DN800_c0_g1_i1	2335	59.7	0	0.79	0	0.55	0	-8.80974	tr|A0A0K9RS85|A0A0K9RS85_SPIOL Uncharacterized protein OS=Spinacia oleracea OX=3562 GN=SOVF_034290 PE=4 SV=1
TRINITY_DN8262_c0_g2_i3	2175	59.62	0	0.86	0	0.59	0	-8.80974	tr|A0A0K9RKC2|A0A0K9RKC2_SPIOL Carboxypeptidase OS=Spinacia oleracea OX=3562 GN=SOVF_062750 PE=3 SV=1
TRINITY_DN849_c0_g1_i7	2541	60.47	0	0.73	0	0.51	0	-8.80974	tr|A0A0K9RBA8|A0A0K9RBA8_SPIOL Uncharacterized protein OS=Spinacia oleracea OX=3562 GN=SOVF_092540 PE=4 SV=1
TRINITY_DN9114_c0_g3_i6	3033	59.61	0.24	0.6	0	0.41	0	-8.80974	tr|A0A0K9RMA0|A0A0K9RMA0_SPIOL Uncharacterized protein OS=Spinacia oleracea OX=3562 GN=SOVF_050650 PE=4 SV=1
TRINITY_DN9439_c1_g1_i6	6340	60.47	0	0.28	0	0.19	0	-8.80974	tr|A0A0K9RGW4|A0A0K9RGW4_SPIOL Uncharacterized protein OS=Spinacia oleracea OX=3562 GN=SOVF_067400 PE=4 SV=1
TRINITY_DN11608_c0_g1_i4	1576	58.69	0	1.2	0	0.83	0	-8.78554	tr|A0A0K9RGY3|A0A0K9RGY3_SPIOL Trehalose 6-phosphate phosphatase OS=Spinacia oleracea OX=3562 GN=SOVF_067850 PE=3 SV=1
TRINITY_DN2143_c1_g1_i10	841	58.62	0	2.55	0	1.76	0	-8.78554	-
TRINITY_DN2574_c1_g2_i11	1937	59.26	0	0.97	0	0.67	0	-8.78554	tr|A0A0J8D1W9|A0A0J8D1W9_BETVU Uncharacterized protein OS=Beta vulgaris subsp. vulgaris OX=3555 GN=BVRB_2g031870 PE=4 SV=1
TRINITY_DN3418_c0_g1_i11	2354	58.79	0	0.77	0	0.53	0	-8.78554	tr|A0A0K9R9A1|A0A0K9R9A1_SPIOL Uncharacterized protein OS=Spinacia oleracea OX=3562 GN=SOVF_099040 PE=4 SV=1
TRINITY_DN4693_c2_g2_i6	2856	59.42	0	0.64	0	0.44	0	-8.78554	tr|A0A0K9R581|A0A0K9R581_SPIOL Uncharacterized protein OS=Spinacia oleracea OX=3562 GN=SOVF_105390 PE=4 SV=1
TRINITY_DN5647_c0_g1_i5	3100	58.81	0	0.58	0	0.4	0	-8.78554	tr|A0A0K9QLA1|A0A0K9QLA1_SPIOL Uncharacterized protein OS=Spinacia oleracea OX=3562 GN=SOVF_166520 PE=4 SV=1
TRINITY_DN5690_c0_g1_i20	3995	58.6	0	0.44	0	0.3	0	-8.78554	tr|A0A0K9RS17|A0A0K9RS17_SPIOL Uncharacterized protein OS=Spinacia oleracea OX=3562 GN=SOVF_040940 PE=4 SV=1
TRINITY_DN5721_c0_g2_i3	1431	59	0	1.35	0	0.93	0	-8.78554	tr|A0A0K9RTD6|A0A0K9RTD6_SPIOL Uncharacterized protein OS=Spinacia oleracea OX=3562 GN=SOVF_036510 PE=4 SV=1
TRINITY_DN6131_c0_g1_i3	5495	58.78	0	0.32	0	0.22	0	-8.78554	tr|F4NCG1|F4NCG1_BETVU Uncharacterized protein OS=Beta vulgaris subsp. vulgaris OX=3555 PE=4 SV=1
TRINITY_DN7171_c0_g1_i18	8661	58.51	0	0.2	0	0.14	0	-8.78554	tr|A0A0J8BB58|A0A0J8BB58_BETVU Uncharacterized protein OS=Beta vulgaris subsp. vulgaris OX=3555 GN=BVRB_7g177790 PE=4 SV=1
TRINITY_DN7618_c0_g1_i22	4787	58.93	0	0.37	0	0.25	0	-8.78554	tr|A0A0K9R670|A0A0K9R670_SPIOL Uncharacterized protein OS=Spinacia oleracea OX=3562 GN=SOVF_106780 PE=4 SV=1
TRINITY_DN4105_c1_g1_i1	675	567.55	1	33.03	0.06	22.77	0.04	-8.78351	-
TRINITY_DN10191_c0_g2_i1	1033	57.97	0	1.95	0	1.35	0	-8.76094	tr|A0A0K9REE0|A0A0K9REE0_SPIOL Uncharacterized protein OS=Spinacia oleracea OX=3562 GN=SOVF_080960 PE=4 SV=1
TRINITY_DN10786_c0_g1_i2	3825	58	0	0.46	0	0.31	0	-8.76094	tr|J7LKC0|J7LKC0_CHEAL Calcium dependent protein kinase 6 (Fragment) OS=Chenopodium album OX=3559 GN=CPK6 PE=2 SV=1
TRINITY_DN11037_c0_g1_i5	2486	57.77	0	0.72	0	0.49	0	-8.76094	tr|J3SDF5|J3SDF5_BETVU Ty3/gypsy retrotransposon protein OS=Beta vulgaris subsp. vulgaris OX=3555 PE=4 SV=1
TRINITY_DN1398_c0_g1_i10	1942	57.96	0	0.94	0	0.65	0	-8.76094	tr|A0A0K9QVH7|A0A0K9QVH7_SPIOL Uncharacterized protein OS=Spinacia oleracea OX=3562 GN=SOVF_136890 PE=3 SV=1
TRINITY_DN14435_c0_g1_i3	685	57.58	0	3.28	0	2.26	0	-8.76094	tr|A0A0K9QFR1|A0A0K9QFR1_SPIOL Uncharacterized protein OS=Spinacia oleracea OX=3562 GN=SOVF_190710 PE=3 SV=1
TRINITY_DN1565_c1_g1_i3	934	57.77	0	2.2	0	1.52	0	-8.76094	tr|A2I5F8|A2I5F8_BETVU Integrase OS=Beta vulgaris OX=161934 PE=4 SV=1
TRINITY_DN1641_c0_g1_i8	597	57.53	0	3.98	0	2.74	0	-8.76094	-
TRINITY_DN17662_c0_g1_i19	4085	58.28	0	0.43	0	0.29	0	-8.76094	tr|A0A0K9Q769|A0A0K9Q769_SPIOL Uncharacterized protein OS=Spinacia oleracea OX=3562 GN=SOVF_213340 PE=4 SV=1
TRINITY_DN1917_c0_g1_i20	825	58.06	0	2.59	0	1.78	0	-8.76094	tr|A0A0K9S0F0|A0A0K9S0F0_SPIOL Uncharacterized protein OS=Spinacia oleracea OX=3562 GN=SOVF_008370 PE=4 SV=1
TRINITY_DN2115_c0_g1_i8	3134	58.22	0	0.56	0	0.39	0	-8.76094	tr|A0A0K9RWX4|A0A0K9RWX4_SPIOL Uncharacterized protein OS=Spinacia oleracea OX=3562 GN=SOVF_019800 PE=4 SV=1
TRINITY_DN2201_c0_g1_i6	2990	58.18	0	0.59	0	0.41	0	-8.76094	tr|A0A0K9RN08|A0A0K9RN08_SPIOL Uncharacterized protein OS=Spinacia oleracea OX=3562 GN=SOVF_048480 PE=4 SV=1
TRINITY_DN254_c0_g2_i1	2287	57.82	0	0.79	0	0.54	0	-8.76094	tr|A0A0K9R3W5|A0A0K9R3W5_SPIOL Uncharacterized protein OS=Spinacia oleracea OX=3562 GN=SOVF_109690 PE=4 SV=1
TRINITY_DN2620_c2_g1_i2	585	58.37	0	4.16	0	2.87	0	-8.76094	-
TRINITY_DN3132_c0_g1_i4	1684	58.08	0	1.11	0	0.76	0	-8.76094	tr|A0A0K9QTY5|A0A0K9QTY5_SPIOL Uncharacterized protein (Fragment) OS=Spinacia oleracea OX=3562 GN=SOVF_141310 PE=4 SV=1
TRINITY_DN4084_c0_g1_i11	2842	58.46	0	0.63	0	0.43	0	-8.76094	tr|A0A0K9QEA3|A0A0K9QEA3_SPIOL Uncharacterized protein OS=Spinacia oleracea OX=3562 GN=SOVF_194320 PE=4 SV=1
TRINITY_DN4145_c0_g1_i5	1723	58.01	0	1.08	0	0.74	0	-8.76094	tr|A0A0K9QSI7|A0A0K9QSI7_SPIOL Uncharacterized protein OS=Spinacia oleracea OX=3562 GN=SOVF_146170 PE=4 SV=1
TRINITY_DN4960_c1_g2_i6	1404	58.39	0	1.37	0	0.94	0	-8.76094	tr|A0A0K9R167|A0A0K9R167_SPIOL Uncharacterized protein (Fragment) OS=Spinacia oleracea OX=3562 GN=SOVF_118610 PE=4 SV=1
TRINITY_DN6669_c0_g2_i1	1517	57.84	0	1.24	0	0.85	0	-8.76094	tr|A0A0K9RSY1|A0A0K9RSY1_SPIOL Uncharacterized protein OS=Spinacia oleracea OX=3562 GN=SOVF_032470 PE=4 SV=1
TRINITY_DN7274_c0_g1_i5	2209	57.67	0	0.81	0	0.56	0	-8.76094	tr|A0A0J8B9C5|A0A0J8B9C5_BETVU Uncharacterized protein OS=Beta vulgaris subsp. vulgaris OX=3555 GN=BVRB_9g225110 PE=4 SV=1
TRINITY_DN893_c0_g2_i4	2241	58.34	0	0.81	0	0.56	0	-8.76094	tr|A0A0K9S293|A0A0K9S293_SPIOL Uncharacterized protein OS=Spinacia oleracea OX=3562 GN=SOVF_001770 PE=4 SV=1
TRINITY_DN9876_c1_g1_i1	594	58	0	4.04	0	2.79	0	-8.76094	-
TRINITY_DN10426_c0_g1_i2	440	56.7	0	6.32	0	4.36	0	-8.73591	-
TRINITY_DN11914_c0_g1_i1	305	57	0	13.05	0	9	0	-8.73591	-
TRINITY_DN12225_c0_g1_i10	2818	57.44	0	0.62	0	0.43	0	-8.73591	tr|A2I5F1|A2I5F1_BETVU Transposon-like protein OS=Beta vulgaris OX=161934 PE=4 SV=1
TRINITY_DN12761_c0_g2_i3	1354	57.04	0	1.39	0	0.96	0	-8.73591	-
TRINITY_DN1598_c1_g1_i6	3584	57.12	0	0.48	0	0.33	0	-8.73591	tr|A0A0J8CM38|A0A0J8CM38_BETVU Uncharacterized protein OS=Beta vulgaris subsp. vulgaris OX=3555 GN=BVRB_3g065540 PE=4 SV=1
TRINITY_DN1718_c0_g1_i11	2111	57.38	0.41	0.85	0.01	0.59	0	-8.73591	tr|A0A0J8B3X6|A0A0J8B3X6_BETVU Uncharacterized protein OS=Beta vulgaris subsp. vulgaris OX=3555 GN=BVRB_003990 PE=3 SV=1
TRINITY_DN1990_c1_g1_i14	4261	56.89	0	0.4	0	0.27	0	-8.73591	tr|A0A0J8CM15|A0A0J8CM15_BETVU Uncharacterized protein OS=Beta vulgaris subsp. vulgaris OX=3555 GN=BVRB_3g065350 PE=4 SV=1
TRINITY_DN2525_c0_g1_i4	4460	57.21	0	0.38	0	0.26	0	-8.73591	tr|A0A0K9RTI1|A0A0K9RTI1_SPIOL Uncharacterized protein OS=Spinacia oleracea OX=3562 GN=SOVF_030070 PE=3 SV=1
TRINITY_DN28071_c0_g1_i19	2675	56.84	0	0.65	0	0.45	0	-8.73591	tr|A0A0K9RY69|A0A0K9RY69_SPIOL Uncharacterized protein OS=Spinacia oleracea OX=3562 GN=SOVF_021970 PE=4 SV=1
TRINITY_DN3504_c0_g1_i16	2662	57.12	0	0.66	0	0.45	0	-8.73591	tr|J3S7K7|J3S7K7_BETVU Mariner transposase OS=Beta vulgaris subsp. vulgaris OX=3555 PE=4 SV=1
TRINITY_DN5121_c0_g1_i3	2543	57.03	0	0.69	0	0.48	0	-8.73591	tr|A0A0J8B5W3|A0A0J8B5W3_BETVU Uncharacterized protein OS=Beta vulgaris subsp. vulgaris OX=3555 GN=BVRB_011370 PE=3 SV=1
TRINITY_DN555_c0_g2_i7	1237	57.41	0	1.56	0	1.07	0	-8.73591	tr|A0A0K9QFL1|A0A0K9QFL1_SPIOL Uncharacterized protein OS=Spinacia oleracea OX=3562 GN=SOVF_184690 PE=4 SV=1
TRINITY_DN7976_c0_g1_i1	3677	57.15	0	0.47	0	0.32	0	-8.73591	tr|A0A0K9QG37|A0A0K9QG37_SPIOL Uncharacterized protein OS=Spinacia oleracea OX=3562 GN=SOVF_183120 PE=3 SV=1
TRINITY_DN9051_c1_g1_i1	2029	56.62	0	0.88	0	0.6	0	-8.73591	tr|A0A0K9RAJ9|A0A0K9RAJ9_SPIOL Uncharacterized protein OS=Spinacia oleracea OX=3562 GN=SOVF_088270 PE=4 SV=1
TRINITY_DN947_c0_g1_i20	4741	57.1	0	0.36	0	0.25	0	-8.73591	tr|A0A0K9QY12|A0A0K9QY12_SPIOL Uncharacterized protein OS=Spinacia oleracea OX=3562 GN=SOVF_128630 PE=4 SV=1
TRINITY_DN1250_c0_g1_i6	1541	55.55	0	1.17	0	0.81	0	-8.71043	tr|A0A0K9QIX2|A0A0K9QIX2_SPIOL Uncharacterized protein OS=Spinacia oleracea OX=3562 GN=SOVF_174070 PE=3 SV=1
TRINITY_DN1584_c0_g3_i3	1955	56.38	0	0.91	0	0.63	0	-8.71043	tr|A0A0K9RNC7|A0A0K9RNC7_SPIOL Uncharacterized protein OS=Spinacia oleracea OX=3562 GN=SOVF_047000 PE=4 SV=1
TRINITY_DN1710_c0_g3_i1	568	56.34	0	4.19	0	2.89	0	-8.71043	-
TRINITY_DN1929_c0_g1_i22	2313	55.73	0	0.75	0	0.52	0	-8.71043	tr|A0A0J8BDK4|A0A0J8BDK4_BETVU Protein farnesyltransferase subunit beta OS=Beta vulgaris subsp. vulgaris OX=3555 GN=BVRB_2g045540 PE=3 SV=1
TRINITY_DN2040_c0_g2_i5	3852	55.74	0	0.43	0	0.3	0	-8.71043	tr|A0A0K9QHW5|A0A0K9QHW5_SPIOL Alpha-mannosidase OS=Spinacia oleracea OX=3562 GN=SOVF_177470 PE=3 SV=1
TRINITY_DN236_c0_g1_i5	4472	56.23	0	0.37	0	0.26	0	-8.71043	tr|A0A0K9QQA9|A0A0K9QQA9_SPIOL Uncharacterized protein OS=Spinacia oleracea OX=3562 GN=SOVF_158760 PE=4 SV=1
TRINITY_DN2633_c0_g1_i2	4007	55.59	0	0.42	0	0.29	0	-8.71043	tr|A0A0K9QZ46|A0A0K9QZ46_SPIOL Uncharacterized protein OS=Spinacia oleracea OX=3562 GN=SOVF_125100 PE=4 SV=1
TRINITY_DN2783_c0_g1_i11	255	55.58	0	19.93	0	13.74	0	-8.71043	tr|A0A0K9QNG7|A0A0K9QNG7_SPIOL Uncharacterized protein OS=Spinacia oleracea OX=3562 GN=SOVF_159510 PE=4 SV=1
TRINITY_DN2884_c0_g1_i7	2958	55.99	0	0.58	0	0.4	0	-8.71043	tr|A0A0K9R418|A0A0K9R418_SPIOL Uncharacterized protein OS=Spinacia oleracea OX=3562 GN=SOVF_109120 PE=4 SV=1
TRINITY_DN3179_c0_g1_i6	2324	55.64	0	0.74	0	0.51	0	-8.71043	tr|A0A0K9QFW3|A0A0K9QFW3_SPIOL Uncharacterized protein OS=Spinacia oleracea OX=3562 GN=SOVF_183910 PE=4 SV=1
TRINITY_DN396_c0_g1_i12	1852	56.11	0	0.96	0	0.66	0	-8.71043	tr|A0A0K9RVF8|A0A0K9RVF8_SPIOL Uncharacterized protein OS=Spinacia oleracea OX=3562 GN=SOVF_024180 PE=3 SV=1
TRINITY_DN4362_c0_g1_i12	250	55.82	0	21.16	0	14.59	0	-8.71043	tr|A0A0K9QW02|A0A0K9QW02_SPIOL Uncharacterized protein (Fragment) OS=Spinacia oleracea OX=3562 GN=SOVF_135110 PE=4 SV=1
TRINITY_DN5118_c0_g1_i5	2085	56.1	0	0.84	0	0.58	0	-8.71043	tr|A0A0K9QGX9|A0A0K9QGX9_SPIOL Uncharacterized protein OS=Spinacia oleracea OX=3562 GN=SOVF_180650 PE=4 SV=1
TRINITY_DN6013_c0_g1_i12	2045	55.65	0.36	0.85	0.01	0.59	0	-8.71043	-
TRINITY_DN7202_c0_g2_i3	2779	56.21	0.05	0.62	0	0.43	0	-8.71043	-
TRINITY_DN10408_c0_g1_i6	3341	55.36	0	0.5	0	0.35	0	-8.6845	tr|A0A0K9REF4|A0A0K9REF4_SPIOL Uncharacterized protein OS=Spinacia oleracea OX=3562 GN=SOVF_076670 PE=3 SV=1
TRINITY_DN1060_c0_g1_i11	2542	54.55	0	0.66	0	0.46	0	-8.6845	tr|A0A0J8B3M0|A0A0J8B3M0_BETVU Uncharacterized protein OS=Beta vulgaris subsp. vulgaris OX=3555 GN=BVRB_006940 PE=4 SV=1
TRINITY_DN11477_c1_g1_i2	1409	55.32	0	1.29	0	0.89	0	-8.6845	-
TRINITY_DN11631_c1_g1_i22	3194	55.03	0	0.52	0	0.36	0	-8.6845	tr|A0A0K9R978|A0A0K9R978_SPIOL WAT1-related protein OS=Spinacia oleracea OX=3562 GN=SOVF_092730 PE=3 SV=1
TRINITY_DN1358_c0_g2_i7	2593	54.76	0	0.65	0	0.45	0	-8.6845	tr|A0A0K9QVT8|A0A0K9QVT8_SPIOL Uncharacterized protein OS=Spinacia oleracea OX=3562 GN=SOVF_142930 PE=4 SV=1
TRINITY_DN1358_c0_g2_i8	2745	55.29	0	0.62	0	0.43	0	-8.6845	tr|A0A0K9QVT8|A0A0K9QVT8_SPIOL Uncharacterized protein OS=Spinacia oleracea OX=3562 GN=SOVF_142930 PE=4 SV=1
TRINITY_DN2201_c0_g1_i5	2914	55.08	0	0.58	0	0.4	0	-8.6845	tr|A0A0K9RN08|A0A0K9RN08_SPIOL Uncharacterized protein OS=Spinacia oleracea OX=3562 GN=SOVF_048480 PE=4 SV=1
TRINITY_DN23410_c0_g1_i4	3845	54.59	0	0.43	0	0.29	0	-8.6845	tr|A0A0K9QRD1|A0A0K9QRD1_SPIOL Uncharacterized protein OS=Spinacia oleracea OX=3562 GN=SOVF_156570 PE=4 SV=1
TRINITY_DN2435_c1_g1_i2	708	55	0	3	0	2.07	0	-8.6845	tr|A0A0K9RR59|A0A0K9RR59_SPIOL Uncharacterized protein OS=Spinacia oleracea OX=3562 GN=SOVF_038230 PE=4 SV=1
TRINITY_DN2610_c1_g1_i9	404	55.32	0	7.16	0	4.94	0	-8.6845	-
TRINITY_DN2785_c0_g1_i5	863	55.45	0	2.33	0	1.61	0	-8.6845	tr|A0A0J7YNI9|A0A0J7YNI9_BETVU Uncharacterized protein OS=Beta vulgaris subsp. vulgaris OX=3555 GN=BVRB_039000 PE=4 SV=1
TRINITY_DN3093_c0_g2_i3	3280	55	0	0.51	0	0.35	0	-8.6845	tr|A0A0K9RP78|A0A0K9RP78_SPIOL Uncharacterized protein OS=Spinacia oleracea OX=3562 GN=SOVF_050540 PE=4 SV=1
TRINITY_DN3264_c0_g1_i3	4228	55.24	0.16	0.39	0	0.27	0	-8.6845	tr|A0A0K9QGJ6|A0A0K9QGJ6_SPIOL Uncharacterized protein OS=Spinacia oleracea OX=3562 GN=SOVF_181840 PE=4 SV=1
TRINITY_DN4108_c0_g1_i5	1280	54.93	0	1.43	0	0.99	0	-8.6845	tr|A0A0J8E1K1|A0A0J8E1K1_BETVU Uncharacterized protein OS=Beta vulgaris subsp. vulgaris OX=3555 GN=BVRB_7g179920 PE=4 SV=1
TRINITY_DN4155_c0_g1_i10	3135	55.24	0	0.53	0	0.37	0	-8.6845	tr|A0A0K9QGU0|A0A0K9QGU0_SPIOL Uncharacterized protein OS=Spinacia oleracea OX=3562 GN=SOVF_180920 PE=4 SV=1
TRINITY_DN4521_c0_g1_i8	3055	55.29	0	0.55	0	0.38	0	-8.6845	tr|A0A0K9RIX1|A0A0K9RIX1_SPIOL Uncharacterized protein OS=Spinacia oleracea OX=3562 GN=SOVF_061300 PE=4 SV=1
TRINITY_DN4899_c0_g1_i2	2431	54.61	0	0.69	0	0.48	0	-8.6845	tr|A0A0K9QMT7|A0A0K9QMT7_SPIOL Uncharacterized protein OS=Spinacia oleracea OX=3562 GN=SOVF_161320 PE=4 SV=1
TRINITY_DN509_c0_g1_i1	3177	54.94	0	0.52	0	0.36	0	-8.6845	tr|A0A0J8F4T9|A0A0J8F4T9_BETVU Uncharacterized protein OS=Beta vulgaris subsp. vulgaris OX=3555 GN=BVRB_5g113550 PE=4 SV=1
TRINITY_DN5153_c0_g1_i1	1452	55.32	0	1.25	0	0.86	0	-8.6845	tr|A0A0J8B6R4|A0A0J8B6R4_BETVU Uncharacterized protein OS=Beta vulgaris subsp. vulgaris OX=3555 GN=BVRB_006660 PE=4 SV=1
TRINITY_DN9262_c1_g1_i8	4480	55.15	0.21	0.37	0	0.25	0	-8.6845	tr|A0A0K9RPA5|A0A0K9RPA5_SPIOL Aspartate aminotransferase (Fragment) OS=Spinacia oleracea OX=3562 GN=SOVF_050370 PE=4 SV=1
TRINITY_DN1173_c1_g1_i2	1950	53.69	0	0.87	0	0.6	0	-8.65809	tr|A0A0K9RI80|A0A0K9RI80_SPIOL Uncharacterized protein OS=Spinacia oleracea OX=3562 GN=SOVF_063820 PE=3 SV=1
TRINITY_DN1486_c0_g1_i1	1991	53.59	0	0.85	0	0.58	0	-8.65809	tr|A0A0K9QE44|A0A0K9QE44_SPIOL Uncharacterized protein OS=Spinacia oleracea OX=3562 GN=SOVF_196350 PE=4 SV=1
TRINITY_DN1486_c0_g1_i10	1988	53.61	0	0.85	0	0.59	0	-8.65809	tr|A0A0K9QE44|A0A0K9QE44_SPIOL Uncharacterized protein OS=Spinacia oleracea OX=3562 GN=SOVF_196350 PE=4 SV=1
TRINITY_DN17221_c0_g2_i3	1268	53.53	0	1.41	0	0.97	0	-8.65809	-
TRINITY_DN196_c1_g1_i9	3114	53.76	0.12	0.52	0	0.36	0	-8.65809	tr|A0A0J8DWP2|A0A0J8DWP2_BETVU Uncharacterized protein OS=Beta vulgaris subsp. vulgaris OX=3555 GN=BVRB_009790 PE=3 SV=1
TRINITY_DN22575_c0_g1_i8	1413	53.73	0	1.25	0	0.86	0	-8.65809	tr|A0A0J8B984|A0A0J8B984_BETVU Uncharacterized protein OS=Beta vulgaris subsp. vulgaris OX=3555 GN=BVRB_8g202040 PE=4 SV=1
TRINITY_DN2543_c0_g2_i7	3281	53.6	0.17	0.49	0	0.34	0	-8.65809	tr|A0A0K9RS10|A0A0K9RS10_SPIOL Uncharacterized protein OS=Spinacia oleracea OX=3562 GN=SOVF_035080 PE=4 SV=1
TRINITY_DN4755_c1_g1_i2	1417	53.93	0	1.25	0	0.86	0	-8.65809	tr|A0A0K9QLM9|A0A0K9QLM9_SPIOL Uncharacterized protein OS=Spinacia oleracea OX=3562 GN=SOVF_165210 PE=3 SV=1
TRINITY_DN4822_c1_g1_i11	2237	53.81	0	0.75	0	0.52	0	-8.65809	tr|A0A0K9RN18|A0A0K9RN18_SPIOL Uncharacterized protein OS=Spinacia oleracea OX=3562 GN=SOVF_048350 PE=4 SV=1
TRINITY_DN5041_c0_g1_i5	1489	54.39	0	1.19	0	0.82	0	-8.65809	tr|A0A0K9QHI9|A0A0K9QHI9_SPIOL Uncharacterized protein OS=Spinacia oleracea OX=3562 GN=SOVF_178600 PE=4 SV=1
TRINITY_DN9739_c0_g1_i5	9795	53.99	0	0.16	0	0.11	0	-8.65809	tr|A0A0K9R9A6|A0A0K9R9A6_SPIOL Uncharacterized protein OS=Spinacia oleracea OX=3562 GN=SOVF_091650 PE=3 SV=1
TRINITY_DN10646_c0_g1_i1	642	53	0	3.31	0	2.28	0	-8.63119	tr|A0A0K9RK19|A0A0K9RK19_SPIOL Uncharacterized protein OS=Spinacia oleracea OX=3562 GN=SOVF_057710 PE=4 SV=1
TRINITY_DN1678_c1_g1_i5	3627	53.03	0	0.44	0	0.3	0	-8.63119	tr|A0A0J8E2Q9|A0A0J8E2Q9_BETVU Uncharacterized protein OS=Beta vulgaris subsp. vulgaris OX=3555 GN=BVRB_6g155590 PE=4 SV=1
TRINITY_DN243_c0_g1_i1	1835	53.03	0	0.92	0	0.63	0	-8.63119	tr|A0A0K9S135|A0A0K9S135_SPIOL Uncharacterized protein OS=Spinacia oleracea OX=3562 GN=SOVF_005470 PE=4 SV=1
TRINITY_DN2589_c1_g1_i3	2844	53.19	0	0.57	0	0.39	0	-8.63119	tr|A0A0K9QMN4|A0A0K9QMN4_SPIOL Defective in cullin neddylation protein OS=Spinacia oleracea OX=3562 GN=SOVF_166730 PE=4 SV=1
TRINITY_DN2638_c0_g1_i9	2873	52.71	0	0.56	0	0.39	0	-8.63119	tr|A0A0K9QYN4|A0A0K9QYN4_SPIOL Uncharacterized protein OS=Spinacia oleracea OX=3562 GN=SOVF_125920 PE=3 SV=1
TRINITY_DN2696_c0_g1_i11	3878	53.11	0	0.41	0	0.28	0	-8.63119	tr|A0A0K9RUW6|A0A0K9RUW6_SPIOL Uncharacterized protein OS=Spinacia oleracea OX=3562 GN=SOVF_025710 PE=4 SV=1
TRINITY_DN4309_c0_g1_i4	3066	53.09	0	0.53	0	0.36	0	-8.63119	tr|A0A0K9QEF8|A0A0K9QEF8_SPIOL Uncharacterized protein OS=Spinacia oleracea OX=3562 GN=SOVF_188460 PE=4 SV=1
TRINITY_DN607_c0_g1_i1	2331	53.39	0	0.71	0	0.49	0	-8.63119	tr|A0A0K9QJR4|A0A0K9QJR4_SPIOL Uncharacterized protein OS=Spinacia oleracea OX=3562 GN=SOVF_171200 PE=4 SV=1
TRINITY_DN6080_c0_g1_i1	2145	52.86	0	0.77	0	0.53	0	-8.63119	tr|A0A0K9R7K4|A0A0K9R7K4_SPIOL Uncharacterized protein OS=Spinacia oleracea OX=3562 GN=SOVF_097940 PE=4 SV=1
TRINITY_DN701_c0_g1_i18	7906	53.42	0	0.2	0	0.14	0	-8.63119	tr|A0A0K9RLS4|A0A0K9RLS4_SPIOL Uncharacterized protein OS=Spinacia oleracea OX=3562 GN=SOVF_058420 PE=4 SV=1
TRINITY_DN8234_c0_g2_i3	355	53.43	0	8.85	0	6.1	0	-8.63119	-
TRINITY_DN8339_c0_g1_i9	1950	53.4	0	0.86	0	0.6	0	-8.63119	tr|A0A0K9RKB0|A0A0K9RKB0_SPIOL Uncharacterized protein OS=Spinacia oleracea OX=3562 GN=SOVF_062620 PE=3 SV=1
TRINITY_DN7204_c0_g1_i2	5182	508.66	1	2.91	0.01	2.01	0	-8.62532	tr|F4NCG3|F4NCG3_BETVU Uncharacterized protein OS=Beta vulgaris subsp. vulgaris OX=3555 PE=4 SV=1
TRINITY_DN1105_c1_g1_i20	5340	51.9	0	0.29	0	0.2	0	-8.60378	tr|A0A0K9QP25|A0A0K9QP25_SPIOL Uncharacterized protein OS=Spinacia oleracea OX=3562 GN=SOVF_157710 PE=4 SV=1
TRINITY_DN13750_c0_g1_i2	561	52.26	0	3.96	0	2.73	0	-8.60378	tr|A0A0K9R3L1|A0A0K9R3L1_SPIOL Uncharacterized protein OS=Spinacia oleracea OX=3562 GN=SOVF_115840 PE=4 SV=1
TRINITY_DN1667_c0_g1_i13	2109	51.96	0	0.77	0	0.53	0	-8.60378	tr|G5DVU6|G5DVU6_SILLA VIRE2 interacting protein (Fragment) OS=Silene latifolia OX=37657 PE=2 SV=1
TRINITY_DN2574_c1_g2_i6	2019	52.19	0	0.81	0	0.56	0	-8.60378	tr|A0A0K9RQK0|A0A0K9RQK0_SPIOL Uncharacterized protein OS=Spinacia oleracea OX=3562 GN=SOVF_040540 PE=4 SV=1
TRINITY_DN2588_c0_g1_i7	4282	52.46	0	0.37	0	0.25	0	-8.60378	tr|A0A0K9QZK8|A0A0K9QZK8_SPIOL Uncharacterized protein OS=Spinacia oleracea OX=3562 GN=SOVF_129990 PE=4 SV=1
TRINITY_DN3331_c1_g2_i10	3779	52.24	0	0.42	0	0.29	0	-8.60378	tr|A0A0K9RW01|A0A0K9RW01_SPIOL Protein BCCIP homolog OS=Spinacia oleracea OX=3562 GN=SOVF_023470 PE=3 SV=1
TRINITY_DN3431_c0_g1_i8	4326	51.92	0	0.36	0	0.25	0	-8.60378	tr|A0A0K9QH88|A0A0K9QH88_SPIOL Tafazzin family protein OS=Spinacia oleracea OX=3562 GN=SOVF_179510 PE=3 SV=1
TRINITY_DN3455_c0_g1_i17	2103	51.81	0	0.77	0	0.53	0	-8.60378	tr|A0A0K9S3U4|A0A0K9S3U4_SPIOL Vacuolar cation/proton exchanger OS=Spinacia oleracea OX=3562 GN=SOVF_002360 PE=3 SV=1
TRINITY_DN3898_c0_g2_i4	1766	52.38	0	0.95	0	0.65	0	-8.60378	tr|A0A0K9RVV6|A0A0K9RVV6_SPIOL Uncharacterized protein OS=Spinacia oleracea OX=3562 GN=SOVF_023100 PE=3 SV=1
TRINITY_DN4173_c0_g1_i17	2602	52.31	0	0.62	0	0.43	0	-8.60378	tr|A0A0K9QZ54|A0A0K9QZ54_SPIOL Uncharacterized protein OS=Spinacia oleracea OX=3562 GN=SOVF_131670 PE=4 SV=1
TRINITY_DN5483_c0_g1_i9	5825	51.71	0	0.26	0	0.18	0	-8.60378	tr|G9FIF2|G9FIF2_BETVU Uncharacterized protein OS=Beta vulgaris OX=161934 PE=4 SV=1
TRINITY_DN5768_c1_g2_i4	4319	52.35	0	0.36	0	0.25	0	-8.60378	-
TRINITY_DN6453_c0_g1_i17	960	52.04	0	1.92	0	1.32	0	-8.60378	tr|A0A0K9S0R3|A0A0K9S0R3_SPIOL Uncharacterized protein OS=Spinacia oleracea OX=3562 GN=SOVF_007390 PE=4 SV=1
TRINITY_DN7137_c0_g1_i4	1253	51.98	0	1.39	0	0.96	0	-8.60378	tr|A0A0K9RW84|A0A0K9RW84_SPIOL Uncharacterized protein OS=Spinacia oleracea OX=3562 GN=SOVF_021270 PE=4 SV=1
TRINITY_DN7336_c1_g1_i1	515	52	0	4.49	0	3.09	0	-8.60378	-
TRINITY_DN7699_c0_g2_i4	1560	51.73	0	1.07	0	0.74	0	-8.60378	tr|A0A0K9QQP4|A0A0K9QQP4_SPIOL Uncharacterized protein OS=Spinacia oleracea OX=3562 GN=SOVF_151940 PE=4 SV=1
TRINITY_DN8242_c0_g1_i11	5151	52.04	0	0.3	0	0.21	0	-8.60378	tr|A0A0K9QZZ4|A0A0K9QZZ4_SPIOL Uncharacterized protein OS=Spinacia oleracea OX=3562 GN=SOVF_122270 PE=4 SV=1
TRINITY_DN9095_c1_g1_i2	3255	52.12	0	0.48	0	0.33	0	-8.60378	tr|A0A0K9QQX4|A0A0K9QQX4_SPIOL Uncharacterized protein OS=Spinacia oleracea OX=3562 GN=SOVF_150400 PE=4 SV=1
TRINITY_DN909_c1_g3_i7	1861	52.22	0.2	0.89	0	0.61	0	-8.60378	tr|A0A0K9QUC0|A0A0K9QUC0_SPIOL Uncharacterized protein (Fragment) OS=Spinacia oleracea OX=3562 GN=SOVF_140160 PE=3 SV=1
TRINITY_DN10630_c0_g1_i2	2765	50.98	0	0.56	0	0.39	0	-8.57584	tr|A0A0K9RET6|A0A0K9RET6_SPIOL Uncharacterized protein OS=Spinacia oleracea OX=3562 GN=SOVF_079570 PE=4 SV=1
TRINITY_DN15549_c0_g1_i1	811	50.92	0	2.32	0	1.6	0	-8.57584	-
TRINITY_DN1577_c0_g1_i21	6871	50.53	0	0.22	0	0.15	0	-8.57584	tr|I3NN21|I3NN21_BETVU Bolting time control 1 OS=Beta vulgaris subsp. vulgaris OX=3555 GN=BTC1 PE=2 SV=1
TRINITY_DN192_c0_g1_i4	1340	51.47	0.07	1.27	0	0.88	0	-8.57584	tr|A0A0K9QSI1|A0A0K9QSI1_SPIOL Uncharacterized protein OS=Spinacia oleracea OX=3562 GN=SOVF_146390 PE=4 SV=1
TRINITY_DN2306_c0_g1_i1	1561	51.08	0	1.06	0	0.73	0	-8.57584	tr|A0A0K9R2D9|A0A0K9R2D9_SPIOL Uncharacterized protein OS=Spinacia oleracea OX=3562 GN=SOVF_114570 PE=3 SV=1
TRINITY_DN242_c0_g1_i14	3387	51.33	0.03	0.46	0	0.32	0	-8.57584	tr|A0A0K9RZ90|A0A0K9RZ90_SPIOL Uncharacterized protein OS=Spinacia oleracea OX=3562 GN=SOVF_017500 PE=4 SV=1
TRINITY_DN2543_c0_g4_i1	1278	50.97	0	1.33	0	0.92	0	-8.57584	tr|A0A0K9RS10|A0A0K9RS10_SPIOL Uncharacterized protein OS=Spinacia oleracea OX=3562 GN=SOVF_035080 PE=4 SV=1
TRINITY_DN3993_c0_g1_i4	3532	51.16	0.31	0.44	0	0.3	0	-8.57584	tr|A0A0K9R9Y8|A0A0K9R9Y8_SPIOL Uncharacterized protein OS=Spinacia oleracea OX=3562 GN=SOVF_090050 PE=4 SV=1
TRINITY_DN4228_c0_g3_i7	968	50.98	0	1.86	0	1.28	0	-8.57584	tr|A0A0K9QBC0|A0A0K9QBC0_SPIOL Membrane-anchored ubiquitin-fold protein OS=Spinacia oleracea OX=3562 GN=SOVF_205510 PE=4 SV=1
TRINITY_DN4362_c0_g1_i17	417	50.59	0	6.19	0	4.27	0	-8.57584	-
TRINITY_DN4949_c0_g1_i2	1284	51	0	1.32	0	0.91	0	-8.57584	tr|A0A0K9R0K8|A0A0K9R0K8_SPIOL Uncharacterized protein OS=Spinacia oleracea OX=3562 GN=SOVF_120290 PE=4 SV=1
TRINITY_DN5780_c1_g1_i2	2411	50.69	0	0.65	0	0.45	0	-8.57584	tr|A0A0K9R2J5|A0A0K9R2J5_SPIOL Uncharacterized protein (Fragment) OS=Spinacia oleracea OX=3562 GN=SOVF_114190 PE=4 SV=1
TRINITY_DN5808_c0_g1_i5	874	50.97	0	2.11	0	1.46	0	-8.57584	-
TRINITY_DN6128_c0_g2_i1	3357	51.03	0	0.46	0	0.32	0	-8.57584	tr|A0A0J8B8H8|A0A0J8B8H8_BETVU Uncharacterized protein OS=Beta vulgaris subsp. vulgaris OX=3555 GN=BVRB_5g125880 PE=4 SV=1
TRINITY_DN943_c1_g1_i1	1163	50.78	0	1.48	0	1.02	0	-8.57584	tr|A0A0K9REI6|A0A0K9REI6_SPIOL Uncharacterized protein OS=Spinacia oleracea OX=3562 GN=SOVF_080590 PE=4 SV=1
TRINITY_DN10015_c0_g1_i1	616	50	0.33	3.31	0.02	2.28	0.02	-8.54735	-
TRINITY_DN1104_c0_g1_i3	875	49.94	0	2.07	0	1.42	0	-8.54735	tr|A0A0K9QF69|A0A0K9QF69_SPIOL Peptidylprolyl isomerase OS=Spinacia oleracea OX=3562 GN=SOVF_192750 PE=4 SV=1
TRINITY_DN1105_c1_g1_i24	4308	50.46	0	0.35	0	0.24	0	-8.54735	tr|A0A0K9QP25|A0A0K9QP25_SPIOL Uncharacterized protein OS=Spinacia oleracea OX=3562 GN=SOVF_157710 PE=4 SV=1
TRINITY_DN13566_c0_g2_i4	3288	49.76	0	0.46	0	0.32	0	-8.54735	tr|A0A0K9Q8F7|A0A0K9Q8F7_SPIOL Uncharacterized protein (Fragment) OS=Spinacia oleracea OX=3562 GN=SOVF_213410 PE=3 SV=1
TRINITY_DN20350_c0_g1_i1	2400	49.83	0	0.64	0	0.44	0	-8.54735	-
TRINITY_DN2122_c0_g1_i9	3039	50.35	0	0.5	0	0.35	0	-8.54735	tr|A0A0K9RT66|A0A0K9RT66_SPIOL Uncharacterized protein OS=Spinacia oleracea OX=3562 GN=SOVF_031650 PE=4 SV=1
TRINITY_DN21821_c0_g1_i7	1356	50.32	0	1.23	0	0.85	0	-8.54735	tr|A0A0K9RI80|A0A0K9RI80_SPIOL Uncharacterized protein OS=Spinacia oleracea OX=3562 GN=SOVF_063820 PE=3 SV=1
TRINITY_DN2407_c2_g1_i1	549	49.55	0	3.88	0	2.67	0	-8.54735	-
TRINITY_DN3420_c0_g2_i4	1604	49.75	0	1	0	0.69	0	-8.54735	tr|A0A0K9QXN3|A0A0K9QXN3_SPIOL Uncharacterized protein OS=Spinacia oleracea OX=3562 GN=SOVF_129660 PE=4 SV=1
TRINITY_DN4496_c0_g1_i9	3202	50.41	0.45	0.48	0	0.33	0	-8.54735	tr|A0A0K9R8R3|A0A0K9R8R3_SPIOL Uncharacterized protein OS=Spinacia oleracea OX=3562 GN=SOVF_101000 PE=4 SV=1
TRINITY_DN5926_c0_g1_i16	3068	49.57	0	0.49	0	0.34	0	-8.54735	tr|A0A0K9RI43|A0A0K9RI43_SPIOL Uncharacterized protein OS=Spinacia oleracea OX=3562 GN=SOVF_064450 PE=4 SV=1
TRINITY_DN599_c0_g1_i10	2391	50.22	0	0.65	0	0.45	0	-8.54735	tr|A0A0K9QP96|A0A0K9QP96_SPIOL Uncharacterized protein OS=Spinacia oleracea OX=3562 GN=SOVF_156920 PE=3 SV=1
TRINITY_DN6001_c0_g1_i1	3339	50.5	0	0.46	0	0.32	0	-8.54735	tr|A0A0K9QIG7|A0A0K9QIG7_SPIOL Kinesin-like protein OS=Spinacia oleracea OX=3562 GN=SOVF_180610 PE=3 SV=1
TRINITY_DN67_c1_g1_i1	1191	50.14	0	1.42	0	0.98	0	-8.54735	tr|A0A0K9RMA7|A0A0K9RMA7_SPIOL Beta-amylase OS=Spinacia oleracea OX=3562 GN=SOVF_055720 PE=3 SV=1
TRINITY_DN72_c0_g1_i10	2790	50.08	0	0.55	0	0.38	0	-8.54735	tr|A0A0K9S0N4|A0A0K9S0N4_SPIOL Uncharacterized protein OS=Spinacia oleracea OX=3562 GN=SOVF_007720 PE=4 SV=1
TRINITY_DN7798_c0_g1_i6	923	49.75	0	1.92	0	1.33	0	-8.54735	-
TRINITY_DN5357_c0_g1_i2	3486	475.98	1.1	4.12	0.01	2.84	0.01	-8.52864	tr|A0A0K9QQY7|A0A0K9QQY7_SPIOL Uncharacterized protein OS=Spinacia oleracea OX=3562 GN=SOVF_151300 PE=4 SV=1
TRINITY_DN10473_c0_g2_i2	861	49	0	2.07	0	1.43	0	-8.51828	-
TRINITY_DN13284_c0_g1_i7	2243	48.84	0	0.68	0	0.47	0	-8.51828	tr|A0A0K9R1B0|A0A0K9R1B0_SPIOL Uncharacterized protein OS=Spinacia oleracea OX=3562 GN=SOVF_115880 PE=4 SV=1
TRINITY_DN1478_c0_g1_i3	2926	48.75	0.32	0.51	0	0.35	0	-8.51828	tr|A0A0K9RT55|A0A0K9RT55_SPIOL Uncharacterized protein OS=Spinacia oleracea OX=3562 GN=SOVF_038020 PE=4 SV=1
TRINITY_DN158_c0_g2_i6	1640	49.33	0	0.97	0	0.67	0	-8.51828	tr|A0A0J8B611|A0A0J8B611_BETVU Uncharacterized protein OS=Beta vulgaris subsp. vulgaris OX=3555 GN=BVRB_9g224950 PE=4 SV=1
TRINITY_DN1731_c0_g3_i2	2700	49.01	0.48	0.56	0.01	0.38	0	-8.51828	tr|A0A0K9RCI4|A0A0K9RCI4_SPIOL Uncharacterized protein OS=Spinacia oleracea OX=3562 GN=SOVF_082160 PE=4 SV=1
TRINITY_DN2122_c0_g1_i12	3117	48.99	0	0.48	0	0.33	0	-8.51828	tr|A0A0J8FKH4|A0A0J8FKH4_BETVU Uncharacterized protein OS=Beta vulgaris subsp. vulgaris OX=3555 GN=BVRB_3g050440 PE=4 SV=1
TRINITY_DN2503_c0_g1_i15	3694	48.88	0	0.4	0	0.27	0	-8.51828	tr|A0A0J8BM51|A0A0J8BM51_BETVU Uncharacterized protein OS=Beta vulgaris subsp. vulgaris OX=3555 GN=BVRB_9g206100 PE=4 SV=1
TRINITY_DN27861_c0_g1_i1	1798	49	0	0.87	0	0.6	0	-8.51828	tr|A0A0K9RUU1|A0A0K9RUU1_SPIOL Uncharacterized protein OS=Spinacia oleracea OX=3562 GN=SOVF_026120 PE=4 SV=1
TRINITY_DN2976_c0_g2_i10	1464	49.46	0	1.1	0	0.76	0	-8.51828	-
TRINITY_DN3130_c0_g1_i3	1349	48.73	0	1.2	0	0.82	0	-8.51828	tr|A0A0J8E4J2|A0A0J8E4J2_BETVU Uncharacterized protein OS=Beta vulgaris subsp. vulgaris OX=3555 GN=BVRB_4g096290 PE=4 SV=1
TRINITY_DN3418_c0_g1_i13	1824	49.37	0	0.86	0	0.59	0	-8.51828	tr|A0A0K9R9A1|A0A0K9R9A1_SPIOL Uncharacterized protein OS=Spinacia oleracea OX=3562 GN=SOVF_099040 PE=4 SV=1
TRINITY_DN4681_c0_g2_i10	3038	48.95	0	0.49	0	0.34	0	-8.51828	tr|A0A0K9RPW6|A0A0K9RPW6_SPIOL Uncharacterized protein OS=Spinacia oleracea OX=3562 GN=SOVF_041950 PE=4 SV=1
TRINITY_DN6958_c1_g1_i6	2196	49.33	0	0.7	0	0.48	0	-8.51828	tr|A0A0K9S3V2|A0A0K9S3V2_SPIOL Uncharacterized protein OS=Spinacia oleracea OX=3562 GN=SOVF_002160 PE=4 SV=1
TRINITY_DN880_c0_g1_i7	3119	49.43	0	0.48	0	0.33	0	-8.51828	tr|A0A0S2M6A7|A0A0S2M6A7_9CARY Putative sesquiterpene synthase OS=Persicaria minor OX=488003 GN=SS2 PE=2 SV=1
TRINITY_DN9211_c0_g1_i11	1933	49.43	0	0.81	0	0.56	0	-8.51828	tr|A0A0K9QU04|A0A0K9QU04_SPIOL Uncharacterized protein OS=Spinacia oleracea OX=3562 GN=SOVF_141640 PE=4 SV=1
TRINITY_DN1105_c1_g1_i10	5219	48.05	0	0.27	0	0.19	0	-8.48861	tr|A0A0K9QP25|A0A0K9QP25_SPIOL Uncharacterized protein OS=Spinacia oleracea OX=3562 GN=SOVF_157710 PE=4 SV=1
TRINITY_DN12756_c0_g1_i1	770	48	0	2.34	0	1.61	0	-8.48861	-
TRINITY_DN18820_c0_g2_i11	1658	48.28	0	0.94	0	0.65	0	-8.48861	tr|A0A0K9RG05|A0A0K9RG05_SPIOL Uncharacterized protein OS=Spinacia oleracea OX=3562 GN=SOVF_071030 PE=4 SV=1
TRINITY_DN2057_c0_g1_i8	1525	48.19	0	1.03	0	0.71	0	-8.48861	tr|A0A0K9QTI3|A0A0K9QTI3_SPIOL Uncharacterized protein OS=Spinacia oleracea OX=3562 GN=SOVF_143270 PE=3 SV=1
TRINITY_DN2085_c0_g1_i7	1198	48.22	0	1.36	0	0.94	0	-8.48861	-
TRINITY_DN3292_c0_g1_i3	2300	48.46	0	0.65	0	0.45	0	-8.48861	tr|A0A0K9RJK9|A0A0K9RJK9_SPIOL Uncharacterized protein OS=Spinacia oleracea OX=3562 GN=SOVF_059290 PE=3 SV=1
TRINITY_DN3466_c0_g1_i2	1236	47.84	0	1.3	0	0.9	0	-8.48861	tr|A0A0J8BD51|A0A0J8BD51_BETVU Uncharacterized protein OS=Beta vulgaris subsp. vulgaris OX=3555 GN=BVRB_2g046380 PE=4 SV=1
TRINITY_DN4012_c0_g2_i1	1956	47.72	0	0.77	0	0.53	0	-8.48861	tr|A0A0K9QNH6|A0A0K9QNH6_SPIOL Uncharacterized protein OS=Spinacia oleracea OX=3562 GN=SOVF_165420 PE=3 SV=1
TRINITY_DN4231_c0_g1_i5	1911	48.06	0	0.8	0	0.55	0	-8.48861	tr|A0A0K9QK79|A0A0K9QK79_SPIOL Auxin-responsive protein OS=Spinacia oleracea OX=3562 GN=SOVF_169970 PE=3 SV=1
TRINITY_DN5463_c0_g1_i5	2510	48.08	0	0.59	0	0.41	0	-8.48861	tr|A0A0K9S0N8|A0A0K9S0N8_SPIOL Uncharacterized protein OS=Spinacia oleracea OX=3562 GN=SOVF_013590 PE=4 SV=1
TRINITY_DN5551_c0_g1_i10	4693	48.25	0	0.31	0	0.21	0	-8.48861	tr|A0A0K9QN84|A0A0K9QN84_SPIOL Uncharacterized protein OS=Spinacia oleracea OX=3562 GN=SOVF_166170 PE=4 SV=1
TRINITY_DN8341_c0_g1_i1	440	48.2	0	5.37	0	3.7	0	-8.48861	tr|A0A0K9QKR5|A0A0K9QKR5_SPIOL Uncharacterized protein OS=Spinacia oleracea OX=3562 GN=SOVF_168200 PE=4 SV=1
TRINITY_DN8666_c0_g1_i11	3730	47.8	0	0.39	0	0.27	0	-8.48861	tr|A0A0K9QZI8|A0A0K9QZI8_SPIOL Uncharacterized protein OS=Spinacia oleracea OX=3562 GN=SOVF_123720 PE=4 SV=1
TRINITY_DN10507_c0_g1_i4	3711	46.9	0	0.38	0	0.26	0	-8.45832	tr|A0A0K9QU49|A0A0K9QU49_SPIOL Uncharacterized protein OS=Spinacia oleracea OX=3562 GN=SOVF_141080 PE=4 SV=1
TRINITY_DN1173_c1_g1_i5	2306	46.57	0	0.63	0	0.43	0	-8.45832	tr|A0A0K9RI80|A0A0K9RI80_SPIOL Uncharacterized protein OS=Spinacia oleracea OX=3562 GN=SOVF_063820 PE=3 SV=1
TRINITY_DN1186_c0_g1_i22	6391	46.91	0	0.22	0	0.15	0	-8.45832	tr|A0A0K9R270|A0A0K9R270_SPIOL Uncharacterized protein OS=Spinacia oleracea OX=3562 GN=SOVF_122050 PE=4 SV=1
TRINITY_DN1253_c0_g1_i15	277	47.2	0	13.61	0	9.39	0	-8.45832	-
TRINITY_DN1264_c0_g1_i8	2837	46.53	0	0.5	0	0.35	0	-8.45832	tr|A0A0K9QR83|A0A0K9QR83_SPIOL Uncharacterized protein OS=Spinacia oleracea OX=3562 GN=SOVF_150330 PE=4 SV=1
TRINITY_DN1353_c1_g1_i18	2568	47.19	0	0.57	0	0.39	0	-8.45832	tr|A0A0K9REV3|A0A0K9REV3_SPIOL Uncharacterized protein OS=Spinacia oleracea OX=3562 GN=SOVF_074670 PE=4 SV=1
TRINITY_DN2953_c0_g4_i5	788	47.45	0	2.24	0	1.55	0	-8.45832	-
TRINITY_DN299_c0_g2_i3	2380	46.71	0	0.61	0	0.42	0	-8.45832	tr|A0A0K9RJW1|A0A0K9RJW1_SPIOL Uncharacterized protein OS=Spinacia oleracea OX=3562 GN=SOVF_064550 PE=4 SV=1
TRINITY_DN3139_c2_g1_i12	1263	46.54	0	1.23	0	0.85	0	-8.45832	tr|A0A0K9QQM2|A0A0K9QQM2_SPIOL Uncharacterized protein (Fragment) OS=Spinacia oleracea OX=3562 GN=SOVF_152480 PE=4 SV=1
TRINITY_DN3263_c0_g1_i3	1816	47.32	0	0.83	0	0.57	0	-8.45832	tr|A0A0K9RYX3|A0A0K9RYX3_SPIOL Uncharacterized protein OS=Spinacia oleracea OX=3562 GN=SOVF_012880 PE=4 SV=1
TRINITY_DN406_c1_g1_i2	2090	47.29	0	0.71	0	0.49	0	-8.45832	tr|A0A0K9QXM6|A0A0K9QXM6_SPIOL Uncharacterized protein OS=Spinacia oleracea OX=3562 GN=SOVF_129740 PE=4 SV=1
TRINITY_DN4086_c0_g1_i5	2969	46.75	0	0.48	0	0.33	0	-8.45832	tr|A0A0K9RHJ8|A0A0K9RHJ8_SPIOL Uncharacterized protein OS=Spinacia oleracea OX=3562 GN=SOVF_070720 PE=4 SV=1
TRINITY_DN4783_c0_g3_i2	658	47	0	2.83	0	1.95	0	-8.45832	-
TRINITY_DN6776_c0_g1_i4	1109	46.71	0	1.44	0	0.99	0	-8.45832	tr|E7BQD5|E7BQD5_SILLA Gag-pol polyprotein OS=Silene latifolia OX=37657 PE=4 SV=1
TRINITY_DN7687_c0_g1_i2	2313	46.64	0	0.63	0	0.43	0	-8.45832	tr|A0A0K9RCZ1|A0A0K9RCZ1_SPIOL Uncharacterized protein OS=Spinacia oleracea OX=3562 GN=SOVF_085490 PE=4 SV=1
TRINITY_DN8339_c0_g1_i6	1716	47.39	0	0.88	0	0.61	0	-8.45832	tr|A0A0K9RKB0|A0A0K9RKB0_SPIOL Uncharacterized protein OS=Spinacia oleracea OX=3562 GN=SOVF_062620 PE=3 SV=1
TRINITY_DN879_c0_g1_i4	3238	47.11	0	0.44	0	0.3	0	-8.45832	tr|A0A0K9RL89|A0A0K9RL89_SPIOL Uncharacterized protein OS=Spinacia oleracea OX=3562 GN=SOVF_059440 PE=4 SV=1
TRINITY_DN897_c0_g1_i30	2799	47.4	0	0.52	0	0.36	0	-8.45832	tr|A0A0K9RGC9|A0A0K9RGC9_SPIOL Beta-galactosidase OS=Spinacia oleracea OX=3562 GN=SOVF_074550 PE=3 SV=1
TRINITY_DN1837_c1_g1_i8	3053	452.19	0.56	4.5	0.01	3.11	0	-8.45402	tr|A0A0K9RLY0|A0A0K9RLY0_SPIOL Uncharacterized protein OS=Spinacia oleracea OX=3562 GN=SOVF_051370 PE=4 SV=1
TRINITY_DN12641_c0_g1_i3	4387	45.66	0	0.31	0	0.21	0	-8.42739	tr|A0A0K9QRE0|A0A0K9QRE0_SPIOL Uncharacterized protein OS=Spinacia oleracea OX=3562 GN=SOVF_149880 PE=4 SV=1
TRINITY_DN14642_c0_g1_i12	1880	45.71	0	0.77	0	0.53	0	-8.42739	tr|A0A0K9QVB7|A0A0K9QVB7_SPIOL Uncharacterized protein OS=Spinacia oleracea OX=3562 GN=SOVF_144170 PE=4 SV=1
TRINITY_DN1472_c0_g1_i5	3608	45.82	0	0.38	0	0.26	0	-8.42739	tr|A0A0K9RDR6|A0A0K9RDR6_SPIOL Urease OS=Spinacia oleracea OX=3562 GN=SOVF_078280 PE=3 SV=1
TRINITY_DN1623_c0_g1_i8	3302	45.64	0	0.42	0	0.29	0	-8.42739	tr|A0A0K9RAT5|A0A0K9RAT5_SPIOL Uncharacterized protein OS=Spinacia oleracea OX=3562 GN=SOVF_087380 PE=4 SV=1
TRINITY_DN1667_c0_g1_i16	2129	45.69	0	0.67	0	0.46	0	-8.42739	tr|G5DVU6|G5DVU6_SILLA VIRE2 interacting protein (Fragment) OS=Silene latifolia OX=37657 PE=2 SV=1
TRINITY_DN1742_c0_g1_i19	2002	46.13	0	0.72	0	0.5	0	-8.42739	tr|A0A0K9RBL0|A0A0K9RBL0_SPIOL Uncharacterized protein OS=Spinacia oleracea OX=3562 GN=SOVF_089450 PE=4 SV=1
TRINITY_DN2262_c0_g1_i10	1370	45.63	0	1.1	0	0.76	0	-8.42739	tr|A0A0K9QWU4|A0A0K9QWU4_SPIOL Uncharacterized protein OS=Spinacia oleracea OX=3562 GN=SOVF_139200 PE=4 SV=1
TRINITY_DN2262_c0_g1_i22	1748	46.21	0	0.84	0	0.58	0	-8.42739	tr|A0A0K9RNN6|A0A0K9RNN6_SPIOL Uncharacterized protein OS=Spinacia oleracea OX=3562 GN=SOVF_051630 PE=3 SV=1
TRINITY_DN2337_c0_g1_i10	3320	46.2	0	0.42	0	0.29	0	-8.42739	tr|A0A0K9RJ70|A0A0K9RJ70_SPIOL Uncharacterized protein OS=Spinacia oleracea OX=3562 GN=SOVF_060900 PE=4 SV=1
TRINITY_DN2687_c0_g1_i2	2162	46.26	0	0.67	0	0.46	0	-8.42739	tr|A0A0J8BA70|A0A0J8BA70_BETVU Uncharacterized protein OS=Beta vulgaris subsp. vulgaris OX=3555 GN=BVRB_8g199800 PE=4 SV=1
TRINITY_DN3495_c0_g1_i5	4976	45.53	0.18	0.27	0	0.19	0	-8.42739	tr|A0A0K9QW10|A0A0K9QW10_SPIOL Uncharacterized protein OS=Spinacia oleracea OX=3562 GN=SOVF_135120 PE=4 SV=1
TRINITY_DN403_c2_g1_i2	3349	45.56	0	0.41	0	0.28	0	-8.42739	tr|A0A0K9QRP7|A0A0K9QRP7_SPIOL Uncharacterized protein OS=Spinacia oleracea OX=3562 GN=SOVF_155880 PE=3 SV=1
TRINITY_DN4332_c0_g1_i15	3081	45.75	0	0.45	0	0.31	0	-8.42739	tr|A0A0K9S030|A0A0K9S030_SPIOL Uncharacterized protein OS=Spinacia oleracea OX=3562 GN=SOVF_009830 PE=4 SV=1
TRINITY_DN495_c0_g1_i25	4729	45.77	0	0.29	0	0.2	0	-8.42739	tr|A0A0K9QRY5|A0A0K9QRY5_SPIOL Uncharacterized protein OS=Spinacia oleracea OX=3562 GN=SOVF_153470 PE=4 SV=1
TRINITY_DN5038_c0_g1_i3	5091	46.06	0	0.27	0	0.18	0	-8.42739	tr|A0A0J8CC42|A0A0J8CC42_BETVU Uncharacterized protein OS=Beta vulgaris subsp. vulgaris OX=3555 GN=BVRB_5g111260 PE=4 SV=1
TRINITY_DN6597_c0_g1_i1	6022	45.6	0	0.22	0	0.15	0	-8.42739	tr|A0A0K9RA21|A0A0K9RA21_SPIOL Uncharacterized protein OS=Spinacia oleracea OX=3562 GN=SOVF_090030 PE=4 SV=1
TRINITY_DN1574_c1_g1_i9	4117	1233.31	2.97	8.96	0.02	6.18	0.01	-8.42017	tr|A0A0K9S1U1|A0A0K9S1U1_SPIOL Uncharacterized protein OS=Spinacia oleracea OX=3562 GN=SOVF_008850 PE=4 SV=1
TRINITY_DN1007_c0_g1_i14	4221	45.23	0	0.32	0	0.22	0	-8.39577	tr|A0A0K9R0W3|A0A0K9R0W3_SPIOL Uncharacterized protein OS=Spinacia oleracea OX=3562 GN=SOVF_119390 PE=4 SV=1
TRINITY_DN10384_c0_g2_i9	2964	44.52	0	0.46	0	0.32	0	-8.39577	tr|A0A0K9RDK2|A0A0K9RDK2_SPIOL Uncharacterized protein OS=Spinacia oleracea OX=3562 GN=SOVF_079180 PE=4 SV=1
TRINITY_DN10925_c0_g2_i6	2819	45.47	0	0.49	0	0.34	0	-8.39577	tr|A0A0J8B706|A0A0J8B706_BETVU Uncharacterized protein OS=Beta vulgaris subsp. vulgaris OX=3555 GN=BVRB_7g179610 PE=4 SV=1
TRINITY_DN12601_c0_g1_i4	2530	45.07	0	0.55	0	0.38	0	-8.39577	tr|A0A0K9QIH3|A0A0K9QIH3_SPIOL Uncharacterized protein OS=Spinacia oleracea OX=3562 GN=SOVF_175580 PE=4 SV=1
TRINITY_DN1318_c0_g1_i10	2338	45.19	0	0.6	0	0.41	0	-8.39577	tr|A0A0K9S287|A0A0K9S287_SPIOL Uncharacterized protein OS=Spinacia oleracea OX=3562 GN=SOVF_003080 PE=4 SV=1
TRINITY_DN13777_c0_g1_i5	2370	45.4	0	0.59	0	0.41	0	-8.39577	tr|A0A0K9RRI4|A0A0K9RRI4_SPIOL Uncharacterized protein OS=Spinacia oleracea OX=3562 GN=SOVF_036660 PE=4 SV=1
TRINITY_DN13951_c0_g1_i3	2470	45.18	0	0.56	0	0.39	0	-8.39577	tr|A0A0K9R323|A0A0K9R323_SPIOL Translation factor GUF1 homolog, mitochondrial OS=Spinacia oleracea OX=3562 GN=SOVF_117520 PE=3 SV=1
TRINITY_DN1678_c1_g1_i16	5855	44.78	0	0.23	0	0.16	0	-8.39577	tr|A0A0J8E2Q9|A0A0J8E2Q9_BETVU Uncharacterized protein OS=Beta vulgaris subsp. vulgaris OX=3555 GN=BVRB_6g155590 PE=4 SV=1
TRINITY_DN19637_c0_g1_i9	3539	44.59	0	0.38	0	0.26	0	-8.39577	tr|A0A0K9R657|A0A0K9R657_SPIOL Uncharacterized protein OS=Spinacia oleracea OX=3562 GN=SOVF_108730 PE=4 SV=1
TRINITY_DN2216_c8_g1_i1	218	44.92	0	25.9	0	17.86	0	-8.39577	-
TRINITY_DN2262_c0_g1_i17	728	45	0	2.36	0	1.63	0	-8.39577	tr|A0A0K9QWU4|A0A0K9QWU4_SPIOL Uncharacterized protein OS=Spinacia oleracea OX=3562 GN=SOVF_139200 PE=4 SV=1
TRINITY_DN2302_c1_g1_i8	1002	44.65	0	1.56	0	1.08	0	-8.39577	-
TRINITY_DN3312_c1_g1_i3	808	44.83	0	2.05	0	1.42	0	-8.39577	tr|A0A0K9RP73|A0A0K9RP73_SPIOL Uncharacterized protein OS=Spinacia oleracea OX=3562 GN=SOVF_050670 PE=4 SV=1
TRINITY_DN4069_c0_g1_i8	3312	44.91	0	0.41	0	0.28	0	-8.39577	tr|A0A0K9QRR2|A0A0K9QRR2_SPIOL Uncharacterized protein OS=Spinacia oleracea OX=3562 GN=SOVF_148520 PE=4 SV=1
TRINITY_DN440_c0_g1_i7	3819	44.69	0.01	0.35	0	0.24	0	-8.39577	tr|A0A0K9QZG9|A0A0K9QZG9_SPIOL Uncharacterized protein OS=Spinacia oleracea OX=3562 GN=SOVF_124130 PE=4 SV=1
TRINITY_DN515_c0_g1_i5	2318	44.93	0	0.6	0	0.41	0	-8.39577	tr|A0A0K9QH90|A0A0K9QH90_SPIOL Uncharacterized protein OS=Spinacia oleracea OX=3562 GN=SOVF_185340 PE=4 SV=1
TRINITY_DN701_c0_g1_i1	8105	44.92	0	0.16	0	0.11	0	-8.39577	tr|A0A0K9RLS4|A0A0K9RLS4_SPIOL Uncharacterized protein OS=Spinacia oleracea OX=3562 GN=SOVF_058420 PE=4 SV=1
TRINITY_DN7149_c0_g1_i8	625	44.93	0	2.91	0	2.01	0	-8.39577	tr|G9FIF2|G9FIF2_BETVU Uncharacterized protein OS=Beta vulgaris OX=161934 PE=4 SV=1
TRINITY_DN8348_c1_g1_i3	4698	45.36	0.12	0.29	0	0.2	0	-8.39577	tr|A0A0K9RE94|A0A0K9RE94_SPIOL Uncharacterized protein OS=Spinacia oleracea OX=3562 GN=SOVF_082780 PE=4 SV=1
TRINITY_DN8726_c0_g1_i1	348	45.05	0	7.76	0	5.35	0	-8.39577	-
TRINITY_DN9608_c0_g1_i3	3394	44.53	0	0.4	0	0.27	0	-8.39577	tr|A0A0K9RUZ2|A0A0K9RUZ2_SPIOL COBRA-like protein OS=Spinacia oleracea OX=3562 GN=SOVF_025610 PE=3 SV=1
TRINITY_DN9656_c0_g1_i2	2659	44.81	0	0.52	0	0.36	0	-8.39577	tr|A0A0K9R5H8|A0A0K9R5H8_SPIOL Inositol-1-monophosphatase OS=Spinacia oleracea OX=3562 GN=SOVF_109920 PE=3 SV=1
TRINITY_DN10097_c0_g1_i5	2994	44.43	0	0.45	0	0.31	0	-8.36345	tr|A0A0K9QEB0|A0A0K9QEB0_SPIOL Uncharacterized protein OS=Spinacia oleracea OX=3562 GN=SOVF_195590 PE=4 SV=1
TRINITY_DN10100_c0_g1_i1	907	44.02	0	1.74	0	1.2	0	-8.36345	-
TRINITY_DN1353_c1_g1_i19	1456	43.85	0	0.98	0	0.68	0	-8.36345	tr|A0A0K9REV3|A0A0K9REV3_SPIOL Uncharacterized protein OS=Spinacia oleracea OX=3562 GN=SOVF_074670 PE=4 SV=1
TRINITY_DN1514_c0_g1_i3	513	43.92	0	3.81	0	2.63	0	-8.36345	-
TRINITY_DN15788_c0_g1_i6	6094	44.36	0	0.21	0	0.15	0	-8.36345	tr|A0A0K9RIM7|A0A0K9RIM7_SPIOL Uncharacterized protein OS=Spinacia oleracea OX=3562 GN=SOVF_067560 PE=4 SV=1
TRINITY_DN2127_c0_g1_i6	3144	43.68	0	0.42	0	0.29	0	-8.36345	tr|A0A0K9QTE8|A0A0K9QTE8_SPIOL Uncharacterized protein OS=Spinacia oleracea OX=3562 GN=SOVF_143210 PE=3 SV=1
TRINITY_DN220_c0_g1_i3	3795	44.03	0	0.35	0	0.24	0	-8.36345	tr|A0A0K9RY47|A0A0K9RY47_SPIOL Uncharacterized protein OS=Spinacia oleracea OX=3562 GN=SOVF_015640 PE=4 SV=1
TRINITY_DN2477_c0_g1_i5	1714	43.94	0	0.82	0	0.57	0	-8.36345	tr|A0A0K9QA09|A0A0K9QA09_SPIOL Uncharacterized protein OS=Spinacia oleracea OX=3562 GN=SOVF_208110 PE=4 SV=1
TRINITY_DN2977_c0_g1_i2	3374	43.95	0	0.39	0	0.27	0	-8.36345	tr|A0A0K9RML1|A0A0K9RML1_SPIOL S-adenosylmethionine decarboxylase proenzyme OS=Spinacia oleracea OX=3562 GN=SOVF_049090 PE=3 SV=1
TRINITY_DN4079_c0_g1_i21	2423	44.03	0	0.56	0	0.39	0	-8.36345	tr|A0A0K9QD46|A0A0K9QD46_SPIOL Uncharacterized protein OS=Spinacia oleracea OX=3562 GN=SOVF_192560 PE=4 SV=1
TRINITY_DN4255_c0_g1_i5	1949	43.68	0	0.71	0	0.49	0	-8.36345	tr|A0A0K9QLL8|A0A0K9QLL8_SPIOL Uncharacterized protein OS=Spinacia oleracea OX=3562 GN=SOVF_165320 PE=4 SV=1
TRINITY_DN7218_c0_g1_i6	834	44	0	1.93	0	1.33	0	-8.36345	tr|A0A0K9QXR5|A0A0K9QXR5_SPIOL Uncharacterized protein OS=Spinacia oleracea OX=3562 GN=SOVF_129420 PE=4 SV=1
TRINITY_DN7736_c0_g2_i2	2833	43.77	0	0.47	0	0.33	0	-8.36345	tr|A0A0J8E1S7|A0A0J8E1S7_BETVU Uncharacterized protein OS=Beta vulgaris subsp. vulgaris OX=3555 GN=BVRB_7g179110 PE=4 SV=1
TRINITY_DN8429_c0_g1_i3	2295	44.47	0.08	0.6	0	0.42	0	-8.36345	tr|A0A0K9RXX2|A0A0K9RXX2_SPIOL Uncharacterized protein OS=Spinacia oleracea OX=3562 GN=SOVF_016680 PE=4 SV=1
TRINITY_DN8890_c0_g1_i4	2730	44.05	0	0.49	0	0.34	0	-8.36345	tr|A0A0K9R032|A0A0K9R032_SPIOL Histone acetyltransferase OS=Spinacia oleracea OX=3562 GN=SOVF_121200 PE=3 SV=1
TRINITY_DN9623_c0_g1_i3	3677	43.5	0	0.36	0	0.25	0	-8.36345	tr|A0A0K9R5L6|A0A0K9R5L6_SPIOL Uncharacterized protein OS=Spinacia oleracea OX=3562 GN=SOVF_104290 PE=4 SV=1
TRINITY_DN9829_c0_g3_i2	1262	44.29	0	1.17	0	0.81	0	-8.36345	tr|A0A0K9QR14|A0A0K9QR14_SPIOL Uncharacterized protein OS=Spinacia oleracea OX=3562 GN=SOVF_150760 PE=4 SV=1
TRINITY_DN9853_c0_g1_i15	2015	44.24	0	0.69	0	0.48	0	-8.36345	tr|A0A0K9RWT5|A0A0K9RWT5_SPIOL Glycosyltransferase OS=Spinacia oleracea OX=3562 GN=SOVF_025340 PE=3 SV=1
TRINITY_DN10869_c0_g1_i11	2616	43.13	0.11	0.51	0	0.35	0	-8.33038	-
TRINITY_DN10955_c0_g1_i6	648	42.85	0	2.64	0	1.82	0	-8.33038	tr|A0A0K9R9P1|A0A0K9R9P1_SPIOL Uncharacterized protein (Fragment) OS=Spinacia oleracea OX=3562 GN=SOVF_091050 PE=4 SV=1
TRINITY_DN11976_c0_g1_i2	5246	42.94	0	0.24	0	0.17	0	-8.33038	tr|A0A0K9S1Q5|A0A0K9S1Q5_SPIOL Uncharacterized protein OS=Spinacia oleracea OX=3562 GN=SOVF_009180 PE=4 SV=1
TRINITY_DN1272_c0_g2_i3	529	43	0	3.56	0	2.46	0	-8.33038	-
TRINITY_DN1450_c1_g2_i4	417	43	0	5.26	0	3.63	0	-8.33038	-
TRINITY_DN1917_c0_g1_i15	3548	43.47	0	0.37	0	0.25	0	-8.33038	tr|A0A0K9S0F0|A0A0K9S0F0_SPIOL Uncharacterized protein OS=Spinacia oleracea OX=3562 GN=SOVF_008370 PE=4 SV=1
TRINITY_DN3821_c0_g1_i4	3829	42.71	0	0.33	0	0.23	0	-8.33038	tr|A0A0K9QC29|A0A0K9QC29_SPIOL Uncharacterized protein OS=Spinacia oleracea OX=3562 GN=SOVF_196090 PE=4 SV=1
TRINITY_DN3833_c0_g1_i13	3534	42.97	0	0.37	0	0.25	0	-8.33038	tr|A0A0K9QU28|A0A0K9QU28_SPIOL Hexosyltransferase OS=Spinacia oleracea OX=3562 GN=SOVF_141400 PE=3 SV=1
TRINITY_DN3882_c0_g4_i2	1421	43.45	0	1	0	0.69	0	-8.33038	tr|A0A0K9RZA1|A0A0K9RZA1_SPIOL Uncharacterized protein OS=Spinacia oleracea OX=3562 GN=SOVF_011930 PE=4 SV=1
TRINITY_DN3978_c0_g1_i5	1815	43.06	0	0.75	0	0.52	0	-8.33038	tr|A0A0K9QG98|A0A0K9QG98_SPIOL Uncharacterized protein OS=Spinacia oleracea OX=3562 GN=SOVF_182500 PE=3 SV=1
TRINITY_DN5134_c0_g2_i6	1120	43.33	0	1.32	0	0.91	0	-8.33038	tr|A0A0K9S2R4|A0A0K9S2R4_SPIOL Uncharacterized protein OS=Spinacia oleracea OX=3562 GN=SOVF_000990 PE=4 SV=1
TRINITY_DN6074_c0_g1_i1	1246	42.82	0.49	1.15	0.01	0.79	0.01	-8.33038	-
TRINITY_DN6500_c0_g1_i9	3180	43.18	0	0.41	0	0.28	0	-8.33038	tr|A0A0K9S014|A0A0K9S014_SPIOL Uncharacterized protein OS=Spinacia oleracea OX=3562 GN=SOVF_015210 PE=4 SV=1
TRINITY_DN705_c1_g1_i11	1848	43.3	0	0.74	0	0.51	0	-8.33038	tr|A0A0K9QWL4|A0A0K9QWL4_SPIOL Uncharacterized protein OS=Spinacia oleracea OX=3562 GN=SOVF_133390 PE=4 SV=1
TRINITY_DN7309_c0_g1_i1	3311	42.98	0	0.39	0	0.27	0	-8.33038	tr|A0A0K9QS38|A0A0K9QS38_SPIOL Uncharacterized protein OS=Spinacia oleracea OX=3562 GN=SOVF_154510 PE=4 SV=1
TRINITY_DN7469_c0_g1_i2	2333	42.93	0	0.57	0	0.39	0	-8.33038	tr|A0A0K9QIN9|A0A0K9QIN9_SPIOL Uncharacterized protein OS=Spinacia oleracea OX=3562 GN=SOVF_174990 PE=4 SV=1
TRINITY_DN748_c0_g1_i11	3705	43.45	0	0.35	0	0.24	0	-8.33038	tr|A0A0K9QX80|A0A0K9QX80_SPIOL Uncharacterized protein OS=Spinacia oleracea OX=3562 GN=SOVF_138260 PE=4 SV=1
TRINITY_DN8246_c0_g1_i29	1490	42.52	0	0.93	0	0.64	0	-8.33038	-
TRINITY_DN13193_c1_g1_i1	1243	42	0	1.13	0	0.78	0	-8.29654	-
TRINITY_DN13284_c0_g1_i14	1652	41.79	0	0.81	0	0.56	0	-8.29654	tr|A0A0K9R1B0|A0A0K9R1B0_SPIOL Uncharacterized protein OS=Spinacia oleracea OX=3562 GN=SOVF_115880 PE=4 SV=1
TRINITY_DN180_c1_g1_i15	4180	41.51	0	0.3	0	0.2	0	-8.29654	tr|Q9ZSQ8|Q9ZSQ8_MESCR Malate dehydrogenase (Fragment) OS=Mesembryanthemum crystallinum OX=3544 GN=NADP-ME PE=2 SV=1
TRINITY_DN2314_c0_g1_i20	2638	42.23	0	0.49	0	0.34	0	-8.29654	tr|A0A0K9RG03|A0A0K9RG03_SPIOL Uncharacterized protein OS=Spinacia oleracea OX=3562 GN=SOVF_070710 PE=4 SV=1
TRINITY_DN2358_c0_g1_i7	2144	41.9	0	0.61	0	0.42	0	-8.29654	tr|A0A0K9S0G3|A0A0K9S0G3_SPIOL Uncharacterized protein OS=Spinacia oleracea OX=3562 GN=SOVF_013520 PE=4 SV=1
TRINITY_DN2701_c0_g1_i24	4140	42.48	0	0.31	0	0.21	0	-8.29654	tr|A0A0K9QQZ1|A0A0K9QQZ1_SPIOL Uncharacterized protein OS=Spinacia oleracea OX=3562 GN=SOVF_156490 PE=4 SV=1
TRINITY_DN27349_c0_g2_i1	480	42.38	0	4.09	0	2.82	0	-8.29654	-
TRINITY_DN3229_c0_g1_i14	2558	42.47	0	0.51	0	0.35	0	-8.29654	tr|A0A0K9QBU8|A0A0K9QBU8_SPIOL Uncharacterized protein OS=Spinacia oleracea OX=3562 GN=SOVF_196830 PE=4 SV=1
TRINITY_DN3508_c0_g1_i2	4115	42.26	0	0.31	0	0.21	0	-8.29654	tr|A0A0K9QQM0|A0A0K9QQM0_SPIOL Uncharacterized protein OS=Spinacia oleracea OX=3562 GN=SOVF_156730 PE=4 SV=1
TRINITY_DN4079_c0_g1_i1	1805	41.51	0.01	0.73	0	0.5	0	-8.29654	tr|A0A0K9QD46|A0A0K9QD46_SPIOL Uncharacterized protein OS=Spinacia oleracea OX=3562 GN=SOVF_192560 PE=4 SV=1
TRINITY_DN4256_c0_g1_i1	886	41.71	0	1.7	0	1.17	0	-8.29654	tr|A0A0K9QJW4|A0A0K9QJW4_SPIOL Uncharacterized protein OS=Spinacia oleracea OX=3562 GN=SOVF_176020 PE=4 SV=1
TRINITY_DN467_c0_g1_i13	2239	42.47	0	0.59	0	0.41	0	-8.29654	tr|A0A0K9RA11|A0A0K9RA11_SPIOL Uncharacterized protein OS=Spinacia oleracea OX=3562 GN=SOVF_094540 PE=4 SV=1
TRINITY_DN4717_c0_g1_i18	2764	42.36	0	0.47	0	0.32	0	-8.29654	tr|A0A0K9RAT3|A0A0K9RAT3_SPIOL Uncharacterized protein OS=Spinacia oleracea OX=3562 GN=SOVF_092930 PE=4 SV=1
TRINITY_DN52_c2_g1_i2	627	41.99	0	2.71	0	1.87	0	-8.29654	-
TRINITY_DN558_c0_g1_i3	1506	42.47	0	0.92	0	0.63	0	-8.29654	tr|A0A0K9Q8S6|A0A0K9Q8S6_SPIOL Uncharacterized protein (Fragment) OS=Spinacia oleracea OX=3562 GN=SOVF_206830 PE=4 SV=1
TRINITY_DN5793_c0_g1_i14	2128	41.72	0	0.61	0	0.42	0	-8.29654	tr|A0A0K9QUW4|A0A0K9QUW4_SPIOL Uncharacterized protein OS=Spinacia oleracea OX=3562 GN=SOVF_138480 PE=4 SV=1
TRINITY_DN8201_c0_g1_i5	648	42.3	0	2.6	0	1.8	0	-8.29654	tr|A0A0K9RE35|A0A0K9RE35_SPIOL Uncharacterized protein OS=Spinacia oleracea OX=3562 GN=SOVF_077250 PE=4 SV=1
TRINITY_DN8264_c0_g4_i2	770	41.86	0	2.04	0	1.41	0	-8.29654	-
TRINITY_DN847_c0_g1_i11	1856	41.58	0	0.71	0	0.49	0	-8.29654	tr|A0A0J8B850|A0A0J8B850_BETVU Uncharacterized protein OS=Beta vulgaris subsp. vulgaris OX=3555 GN=BVRB_001970 PE=4 SV=1
TRINITY_DN9102_c1_g1_i1	345	42.35	0	7.43	0	5.12	0	-8.29654	-
TRINITY_DN9159_c0_g1_i1	839	42.28	0	1.84	0	1.27	0	-8.29654	tr|A0A0K9RBB1|A0A0K9RBB1_SPIOL Uncharacterized protein (Fragment) OS=Spinacia oleracea OX=3562 GN=SOVF_090480 PE=4 SV=1
TRINITY_DN9504_c1_g1_i1	1633	42.14	0	0.83	0	0.57	0	-8.29654	tr|A0A0K9QTL8|A0A0K9QTL8_SPIOL Uncharacterized protein OS=Spinacia oleracea OX=3562 GN=SOVF_149410 PE=3 SV=1
TRINITY_DN1249_c3_g1_i3	686	397.84	1.04	22.64	0.06	15.61	0.04	-8.27053	tr|A0A1B3TNU5|A0A1B3TNU5_MIRJA RNaseH OS=Mirabilis jalapa OX=3538 PE=4 SV=1
TRINITY_DN10223_c0_g1_i2	2302	41.22	0	0.56	0	0.38	0	-8.26189	-
TRINITY_DN1101_c11_g1_i2	614	41	0	2.72	0	1.88	0	-8.26189	tr|A0A0K9QAW4|A0A0K9QAW4_SPIOL Uncharacterized protein OS=Spinacia oleracea OX=3562 GN=SOVF_200090 PE=4 SV=1
TRINITY_DN11911_c0_g1_i1	360	41	0	6.6	0	4.55	0	-8.26189	tr|A0A0J8B6J9|A0A0J8B6J9_BETVU Uncharacterized protein OS=Beta vulgaris subsp. vulgaris OX=3555 GN=BVRB_8g201460 PE=4 SV=1
TRINITY_DN1320_c0_g1_i4	7113	40.98	0	0.17	0	0.12	0	-8.26189	tr|A0A0K9RTF0|A0A0K9RTF0_SPIOL Uncharacterized protein OS=Spinacia oleracea OX=3562 GN=SOVF_030520 PE=4 SV=1
TRINITY_DN13623_c0_g1_i4	2684	41.33	0	0.47	0	0.33	0	-8.26189	tr|A0A0K9RFN9|A0A0K9RFN9_SPIOL Uncharacterized protein OS=Spinacia oleracea OX=3562 GN=SOVF_078380 PE=4 SV=1
TRINITY_DN1422_c2_g1_i12	10376	40.52	0	0.11	0	0.08	0	-8.26189	tr|A0A0K9RS94|A0A0K9RS94_SPIOL Uncharacterized protein OS=Spinacia oleracea OX=3562 GN=SOVF_034980 PE=4 SV=1
TRINITY_DN1485_c4_g1_i2	760	41.02	0	2.04	0	1.4	0	-8.26189	-
TRINITY_DN2010_c0_g2_i10	2189	41.01	0	0.58	0	0.4	0	-8.26189	tr|A0A0K9R5T3|A0A0K9R5T3_SPIOL Uncharacterized protein OS=Spinacia oleracea OX=3562 GN=SOVF_103330 PE=4 SV=1
TRINITY_DN24744_c2_g1_i1	543	41	0	3.26	0	2.25	0	-8.26189	tr|A0A0K9S001|A0A0K9S001_SPIOL Probable tRNA N6-adenosine threonylcarbamoyltransferase OS=Spinacia oleracea OX=3562 GN=GCP2 PE=3 SV=1
TRINITY_DN3062_c0_g1_i1	2543	40.8	0	0.49	0	0.34	0	-8.26189	tr|A0A0K9Q9X8|A0A0K9Q9X8_SPIOL Uncharacterized protein OS=Spinacia oleracea OX=3562 GN=SOVF_208660 PE=4 SV=1
TRINITY_DN3456_c0_g1_i2	796	41	0	1.91	0	1.32	0	-8.26189	tr|A0A0J8B9Y4|A0A0J8B9Y4_BETVU Uncharacterized protein OS=Beta vulgaris subsp. vulgaris OX=3555 GN=BVRB_5g124040 PE=4 SV=1
TRINITY_DN4429_c0_g2_i6	1833	41.49	0	0.72	0	0.5	0	-8.26189	tr|A0A0K9QLS9|A0A0K9QLS9_SPIOL Uncharacterized protein OS=Spinacia oleracea OX=3562 GN=SOVF_164520 PE=4 SV=1
TRINITY_DN4511_c0_g1_i23	1291	40.87	0	1.05	0	0.73	0	-8.26189	-
TRINITY_DN5033_c0_g1_i4	567	41.1	0	3.07	0	2.11	0	-8.26189	-
TRINITY_DN5040_c0_g2_i12	1970	40.98	0	0.66	0	0.45	0	-8.26189	-
TRINITY_DN579_c0_g1_i11	6196	41.06	0	0.2	0	0.13	0	-8.26189	tr|A0A0K9QYF0|A0A0K9QYF0_SPIOL Uncharacterized protein OS=Spinacia oleracea OX=3562 GN=SOVF_132420 PE=4 SV=1
TRINITY_DN6032_c0_g2_i1	2159	40.58	0	0.59	0	0.4	0	-8.26189	tr|A0A0K9QI18|A0A0K9QI18_SPIOL Uncharacterized protein OS=Spinacia oleracea OX=3562 GN=SOVF_176730 PE=4 SV=1
TRINITY_DN6310_c1_g3_i3	1607	40.78	0	0.82	0	0.56	0	-8.26189	tr|A0A0K9RIX7|A0A0K9RIX7_SPIOL Uncharacterized protein OS=Spinacia oleracea OX=3562 GN=SOVF_067300 PE=4 SV=1
TRINITY_DN641_c1_g3_i5	1740	40.7	0	0.75	0	0.52	0	-8.26189	tr|A0A0J8BLW3|A0A0J8BLW3_BETVU Uncharacterized protein OS=Beta vulgaris subsp. vulgaris OX=3555 GN=BVRB_9g207080 PE=4 SV=1
TRINITY_DN7674_c0_g1_i3	2043	40.87	0	0.63	0	0.43	0	-8.26189	tr|A0A0K9RIL4|A0A0K9RIL4_SPIOL Uncharacterized protein (Fragment) OS=Spinacia oleracea OX=3562 GN=SOVF_067710 PE=3 SV=1
TRINITY_DN1017_c0_g1_i1	3206	40.46	0	0.38	0	0.26	0	-8.22638	-
TRINITY_DN1023_c0_g1_i9	1743	40.16	0	0.74	0	0.51	0	-8.22638	tr|A0A0K9QG35|A0A0K9QG35_SPIOL Uncharacterized protein OS=Spinacia oleracea OX=3562 GN=SOVF_188320 PE=4 SV=1
TRINITY_DN13136_c0_g2_i9	2568	40.2	0.01	0.48	0	0.33	0	-8.22638	tr|A0A0K9QWH7|A0A0K9QWH7_SPIOL Uncharacterized protein OS=Spinacia oleracea OX=3562 GN=SOVF_133440 PE=4 SV=1
TRINITY_DN13322_c0_g1_i1	4231	40.18	0	0.28	0	0.2	0	-8.22638	tr|A0A0K9RYZ8|A0A0K9RYZ8_SPIOL Uncharacterized protein OS=Spinacia oleracea OX=3562 GN=SOVF_013180 PE=4 SV=1
TRINITY_DN1376_c1_g1_i3	765	39.52	0	1.94	0	1.34	0	-8.22638	-
TRINITY_DN1412_c0_g2_i4	1983	39.96	0	0.63	0	0.44	0	-8.22638	tr|A0A0J8E455|A0A0J8E455_BETVU Uncharacterized protein OS=Beta vulgaris subsp. vulgaris OX=3555 GN=BVRB_5g123190 PE=4 SV=1
TRINITY_DN1528_c0_g1_i15	382	40.21	0.18	5.77	0.03	3.98	0.02	-8.22638	-
TRINITY_DN158_c0_g2_i4	1711	40.35	0	0.75	0	0.52	0	-8.22638	tr|A0A0J8B611|A0A0J8B611_BETVU Uncharacterized protein OS=Beta vulgaris subsp. vulgaris OX=3555 GN=BVRB_9g224950 PE=4 SV=1
TRINITY_DN16939_c1_g1_i1	1427	40	0	0.92	0	0.63	0	-8.22638	tr|A0A0K9QAW2|A0A0K9QAW2_SPIOL Uncharacterized protein OS=Spinacia oleracea OX=3562 GN=SOVF_205310 PE=3 SV=1
TRINITY_DN18927_c0_g1_i4	591	39.68	0	2.79	0	1.92	0	-8.22638	-
TRINITY_DN190_c0_g1_i2	3865	40.31	0	0.31	0	0.22	0	-8.22638	tr|G5DW29|G5DW29_SILLA Putative calreticulin (Fragment) OS=Silene latifolia OX=37657 PE=2 SV=1
TRINITY_DN2348_c0_g2_i6	2068	39.63	0	0.6	0	0.41	0	-8.22638	-
TRINITY_DN3099_c0_g1_i1	1582	40.16	0	0.82	0	0.57	0	-8.22638	tr|A0A249Y708|A0A249Y708_9CARY TATA-box-binding protein OS=Hylocereus polyrhizus OX=1195597 GN=TBP2 PE=2 SV=1
TRINITY_DN3146_c0_g1_i9	874	40.17	0	1.66	0	1.15	0	-8.22638	tr|A0A1B1RVA0|A0A1B1RVA0_AMATR Transcription factor MYB1 OS=Amaranthus tricolor OX=29722 PE=2 SV=1
TRINITY_DN3288_c0_g1_i4	1658	40.18	0	0.78	0	0.54	0	-8.22638	tr|A0A0K9RP72|A0A0K9RP72_SPIOL Signal peptidase I OS=Spinacia oleracea OX=3562 GN=SOVF_044460 PE=3 SV=1
TRINITY_DN3749_c0_g1_i12	1604	40.02	0	0.81	0	0.56	0	-8.22638	tr|A0A0K1LXK2|A0A0K1LXK2_9CARY Dehydration responsive element binding transcription factor 2A OS=Haloxylon ammodendron OX=151230 GN=DREB2A PE=2 SV=1
TRINITY_DN3880_c0_g1_i3	867	40.04	0	1.68	0	1.16	0	-8.22638	tr|A0A0K9R7F7|A0A0K9R7F7_SPIOL Uncharacterized protein OS=Spinacia oleracea OX=3562 GN=SOVF_098070 PE=4 SV=1
TRINITY_DN4338_c0_g1_i6	2291	40.03	0	0.54	0	0.37	0	-8.22638	tr|A0A0K9RVL3|A0A0K9RVL3_SPIOL Nuclear/nucleolar GTPase 2 OS=Spinacia oleracea OX=3562 GN=SOVF_024280 PE=3 SV=1
TRINITY_DN4746_c0_g1_i11	1075	40.27	0	1.29	0	0.89	0	-8.22638	tr|A0A0K9RT47|A0A0K9RT47_SPIOL Sodium/hydrogen exchanger OS=Spinacia oleracea OX=3562 GN=SOVF_031830 PE=3 SV=1
TRINITY_DN6188_c0_g1_i5	2177	40.04	0	0.57	0	0.4	0	-8.22638	tr|A0A0K9QXS9|A0A0K9QXS9_SPIOL Uncharacterized protein OS=Spinacia oleracea OX=3562 GN=SOVF_136250 PE=4 SV=1
TRINITY_DN6665_c0_g1_i3	1068	39.85	0	1.29	0	0.89	0	-8.22638	tr|A0A0K9RLA6|A0A0K9RLA6_SPIOL Uncharacterized protein OS=Spinacia oleracea OX=3562 GN=SOVF_053470 PE=4 SV=1
TRINITY_DN7737_c0_g1_i3	1904	40.47	0	0.67	0	0.46	0	-8.22638	-
TRINITY_DN813_c0_g1_i5	1164	40.17	0	1.17	0	0.81	0	-8.22638	tr|C0KKX9|C0KKX9_9CARY Actin (Fragment) OS=Tamarix hispida OX=189793 PE=2 SV=1
TRINITY_DN9056_c0_g3_i2	751	39.98	0	2.01	0	1.39	0	-8.22638	-
TRINITY_DN11481_c0_g1_i2	3427	39	0	0.34	0	0.24	0	-8.18998	tr|A0A0K9QKY0|A0A0K9QKY0_SPIOL Uncharacterized protein OS=Spinacia oleracea OX=3562 GN=SOVF_167570 PE=4 SV=1
TRINITY_DN11608_c0_g1_i10	2280	38.73	0	0.53	0	0.36	0	-8.18998	tr|A0A0K9RGY3|A0A0K9RGY3_SPIOL Trehalose 6-phosphate phosphatase OS=Spinacia oleracea OX=3562 GN=SOVF_067850 PE=3 SV=1
TRINITY_DN12489_c1_g1_i5	3420	39.17	0	0.35	0	0.24	0	-8.18998	tr|A0A0K9QPC5|A0A0K9QPC5_SPIOL Uncharacterized protein OS=Spinacia oleracea OX=3562 GN=SOVF_161560 PE=4 SV=1
TRINITY_DN1251_c0_g1_i10	2829	38.88	0	0.42	0	0.29	0	-8.18998	tr|A0A0K9RJ88|A0A0K9RJ88_SPIOL Uncharacterized protein OS=Spinacia oleracea OX=3562 GN=SOVF_060290 PE=4 SV=1
TRINITY_DN12600_c0_g3_i4	1034	38.67	0	1.3	0	0.9	0	-8.18998	tr|A0A0K9RZ77|A0A0K9RZ77_SPIOL Transcription initiation factor IIE subunit beta OS=Spinacia oleracea OX=3562 GN=SOVF_018510 PE=3 SV=1
TRINITY_DN12935_c0_g1_i4	1813	38.53	0	0.68	0	0.47	0	-8.18998	tr|A0A0K9R1N3|A0A0K9R1N3_SPIOL Uncharacterized protein OS=Spinacia oleracea OX=3562 GN=SOVF_121960 PE=3 SV=1
TRINITY_DN13276_c0_g2_i3	2881	39.3	0	0.42	0	0.29	0	-8.18998	tr|A0A0K9RW12|A0A0K9RW12_SPIOL Uncharacterized protein OS=Spinacia oleracea OX=3562 GN=SOVF_021920 PE=3 SV=1
TRINITY_DN1655_c0_g1_i6	1411	38.58	0.06	0.9	0	0.62	0	-8.18998	tr|A0A0K9S365|A0A0K9S365_SPIOL Uncharacterized protein OS=Spinacia oleracea OX=3562 GN=SOVF_005670 PE=4 SV=1
TRINITY_DN17444_c0_g1_i3	736	39	0	2.02	0	1.39	0	-8.18998	-
TRINITY_DN1917_c0_g1_i14	5965	39.05	0	0.19	0	0.13	0	-8.18998	tr|A0A0K9QHD9|A0A0K9QHD9_SPIOL Uncharacterized protein OS=Spinacia oleracea OX=3562 GN=SOVF_179040 PE=4 SV=1
TRINITY_DN191_c3_g2_i10	1292	39.23	0	1.01	0	0.7	0	-8.18998	tr|A0A0K9RT82|A0A0K9RT82_SPIOL Uncharacterized protein OS=Spinacia oleracea OX=3562 GN=SOVF_037090 PE=4 SV=1
TRINITY_DN2302_c0_g1_i8	4142	39.3	0	0.28	0	0.2	0	-8.18998	tr|A0A0K9R9J8|A0A0K9R9J8_SPIOL Uncharacterized protein (Fragment) OS=Spinacia oleracea OX=3562 GN=SOVF_091470 PE=3 SV=1
TRINITY_DN2379_c0_g1_i8	3321	39.23	0	0.36	0	0.25	0	-8.18998	tr|A0A0K9RJZ5|A0A0K9RJZ5_SPIOL Uncharacterized protein OS=Spinacia oleracea OX=3562 GN=SOVF_057890 PE=4 SV=1
TRINITY_DN2723_c0_g1_i5	2281	38.69	0	0.53	0	0.36	0	-8.18998	tr|A0A0K9Q7A7|A0A0K9Q7A7_SPIOL Uncharacterized protein OS=Spinacia oleracea OX=3562 GN=SOVF_212680 PE=4 SV=1
TRINITY_DN2853_c0_g1_i6	2471	39.38	0	0.49	0	0.34	0	-8.18998	tr|A0A0K9Q7L3|A0A0K9Q7L3_SPIOL Uncharacterized protein OS=Spinacia oleracea OX=3562 GN=SOVF_211140 PE=4 SV=1
TRINITY_DN3139_c2_g1_i10	478	39.42	0	3.83	0	2.64	0	-8.18998	tr|A0A0K9QQM2|A0A0K9QQM2_SPIOL Uncharacterized protein (Fragment) OS=Spinacia oleracea OX=3562 GN=SOVF_152480 PE=4 SV=1
TRINITY_DN3345_c0_g2_i1	1635	38.88	0	0.77	0	0.53	0	-8.18998	tr|A0A0K9QAX2|A0A0K9QAX2_SPIOL Uncharacterized protein OS=Spinacia oleracea OX=3562 GN=SOVF_207090 PE=3 SV=1
TRINITY_DN4363_c0_g1_i3	1747	39.13	0	0.72	0	0.49	0	-8.18998	tr|A0A0K9QSI6|A0A0K9QSI6_SPIOL Uncharacterized protein (Fragment) OS=Spinacia oleracea OX=3562 GN=SOVF_146600 PE=4 SV=1
TRINITY_DN4756_c0_g1_i4	2165	38.51	0	0.56	0	0.38	0	-8.18998	tr|A0A0K9RTU4|A0A0K9RTU4_SPIOL Uncharacterized protein (Fragment) OS=Spinacia oleracea OX=3562 GN=SOVF_029050 PE=4 SV=1
TRINITY_DN5384_c0_g1_i7	1306	38.87	0	0.99	0	0.68	0	-8.18998	tr|A0A0K9QJV5|A0A0K9QJV5_SPIOL Uncharacterized protein (Fragment) OS=Spinacia oleracea OX=3562 GN=SOVF_175270 PE=3 SV=1
TRINITY_DN5483_c0_g1_i26	2238	38.65	0	0.54	0	0.37	0	-8.18998	tr|G9FIF2|G9FIF2_BETVU Uncharacterized protein OS=Beta vulgaris OX=161934 PE=4 SV=1
TRINITY_DN5705_c0_g1_i7	2092	38.9	0	0.58	0	0.4	0	-8.18998	-
TRINITY_DN5874_c0_g1_i5	2622	38.83	0	0.46	0	0.31	0	-8.18998	tr|A0A0J8BVA5|A0A0J8BVA5_BETVU Uncharacterized protein OS=Beta vulgaris subsp. vulgaris OX=3555 GN=BVRB_8g188100 PE=3 SV=1
TRINITY_DN606_c0_g1_i7	1609	38.57	0	0.77	0	0.53	0	-8.18998	tr|A0A0K9QL78|A0A0K9QL78_SPIOL Uncharacterized protein OS=Spinacia oleracea OX=3562 GN=SOVF_171850 PE=4 SV=1
TRINITY_DN6386_c0_g1_i5	1445	39.49	0	0.89	0	0.62	0	-8.18998	tr|A0A0K9RRM1|A0A0K9RRM1_SPIOL Uncharacterized protein OS=Spinacia oleracea OX=3562 GN=SOVF_036430 PE=4 SV=1
TRINITY_DN742_c0_g2_i1	1998	38.87	0	0.61	0	0.42	0	-8.18998	tr|A0A0K9RS61|A0A0K9RS61_SPIOL 60S ribosomal protein L13 OS=Spinacia oleracea OX=3562 GN=SOVF_035480 PE=3 SV=1
TRINITY_DN746_c0_g2_i1	2176	38.97	0	0.56	0	0.39	0	-8.18998	tr|A0A0K9R580|A0A0K9R580_SPIOL Uncharacterized protein OS=Spinacia oleracea OX=3562 GN=SOVF_105250 PE=4 SV=1
TRINITY_DN8951_c0_g2_i6	891	39.37	0	1.59	0	1.1	0	-8.18998	-
TRINITY_DN1008_c1_g1_i2	1770	38.15	0	0.69	0	0.47	0	-8.15263	tr|A0A0K9R4V4|A0A0K9R4V4_SPIOL Uncharacterized protein OS=Spinacia oleracea OX=3562 GN=SOVF_106210 PE=4 SV=1
TRINITY_DN10536_c0_g1_i7	4249	37.94	0.02	0.27	0	0.18	0	-8.15263	tr|A0A0K9RZP2|A0A0K9RZP2_SPIOL Uncharacterized protein OS=Spinacia oleracea OX=3562 GN=SOVF_015500 PE=3 SV=1
TRINITY_DN11416_c0_g1_i3	1414	38.47	0	0.89	0	0.62	0	-8.15263	tr|A0A0K9RY04|A0A0K9RY04_SPIOL Uncharacterized protein OS=Spinacia oleracea OX=3562 GN=SOVF_021260 PE=4 SV=1
TRINITY_DN1428_c0_g1_i4	2704	38.25	0	0.43	0	0.3	0	-8.15263	tr|A0A0J8B2H4|A0A0J8B2H4_BETVU Uncharacterized protein OS=Beta vulgaris subsp. vulgaris OX=3555 GN=BVRB_009360 PE=4 SV=1
TRINITY_DN1561_c0_g1_i4	2871	37.54	0	0.4	0	0.28	0	-8.15263	tr|A0A0K9RMU0|A0A0K9RMU0_SPIOL Uncharacterized protein OS=Spinacia oleracea OX=3562 GN=SOVF_054440 PE=4 SV=1
TRINITY_DN1565_c0_g1_i2	1490	37.87	0	0.83	0	0.57	0	-8.15263	tr|A0A0K9R465|A0A0K9R465_SPIOL Uncharacterized protein OS=Spinacia oleracea OX=3562 GN=SOVF_108700 PE=4 SV=1
TRINITY_DN1876_c0_g1_i5	2335	37.76	0	0.5	0	0.35	0	-8.15263	tr|A0A0J8C886|A0A0J8C886_BETVU Transcriptional adapter OS=Beta vulgaris subsp. vulgaris OX=3555 GN=BVRB_6g140200 PE=4 SV=1
TRINITY_DN2414_c2_g1_i1	736	38	0	1.97	0	1.36	0	-8.15263	-
TRINITY_DN3003_c0_g2_i2	1912	38.26	0	0.63	0	0.44	0	-8.15263	tr|A0A0K9QCE0|A0A0K9QCE0_SPIOL Uncharacterized protein OS=Spinacia oleracea OX=3562 GN=SOVF_202000 PE=4 SV=1
TRINITY_DN30_c0_g1_i13	2465	38.26	0	0.48	0	0.33	0	-8.15263	tr|A0A0K9R9E2|A0A0K9R9E2_SPIOL Uncharacterized protein OS=Spinacia oleracea OX=3562 GN=SOVF_098500 PE=3 SV=1
TRINITY_DN3314_c0_g2_i8	2806	38.23	0.42	0.42	0	0.29	0	-8.15263	tr|A0A0K9QFH9|A0A0K9QFH9_SPIOL Uncharacterized protein OS=Spinacia oleracea OX=3562 GN=SOVF_190370 PE=4 SV=1
TRINITY_DN3647_c0_g1_i9	2057	38.5	0	0.59	0	0.4	0	-8.15263	tr|A0A0K9RKW4|A0A0K9RKW4_SPIOL Uncharacterized protein OS=Spinacia oleracea OX=3562 GN=SOVF_060430 PE=4 SV=1
TRINITY_DN4313_c0_g1_i7	4196	38.07	0.12	0.27	0	0.19	0	-8.15263	tr|A0A0K9RZA5|A0A0K9RZA5_SPIOL Uncharacterized protein OS=Spinacia oleracea OX=3562 GN=SOVF_011980 PE=4 SV=1
TRINITY_DN4642_c1_g1_i1	1469	37.68	0	0.84	0	0.58	0	-8.15263	tr|A0A0K9RVB3|A0A0K9RVB3_SPIOL Uncharacterized protein OS=Spinacia oleracea OX=3562 GN=SOVF_023920 PE=4 SV=1
TRINITY_DN5161_c0_g1_i5	1335	38.31	0	0.95	0	0.66	0	-8.15263	tr|A0A0K9RW02|A0A0K9RW02_SPIOL Pectin acetylesterase OS=Spinacia oleracea OX=3562 GN=SOVF_022510 PE=3 SV=1
TRINITY_DN557_c0_g1_i11	1638	37.87	0	0.74	0	0.51	0	-8.15263	tr|A0A0K9S277|A0A0K9S277_SPIOL Uncharacterized protein OS=Spinacia oleracea OX=3562 GN=SOVF_008470 PE=4 SV=1
TRINITY_DN5696_c0_g1_i1	2083	37.55	0	0.56	0	0.39	0	-8.15263	tr|A0A0K9QW21|A0A0K9QW21_SPIOL Uncharacterized protein OS=Spinacia oleracea OX=3562 GN=SOVF_139620 PE=4 SV=1
TRINITY_DN5808_c0_g1_i1	1280	37.63	0	0.98	0	0.68	0	-8.15263	-
TRINITY_DN5844_c0_g1_i8	1799	37.8	0	0.67	0	0.46	0	-8.15263	tr|A0A0K9RXR4|A0A0K9RXR4_SPIOL Pectin acetylesterase OS=Spinacia oleracea OX=3562 GN=SOVF_022500 PE=3 SV=1
TRINITY_DN65133_c0_g1_i1	684	38	0	2.17	0	1.5	0	-8.15263	tr|A0A0K9QTY2|A0A0K9QTY2_SPIOL Uncharacterized protein OS=Spinacia oleracea OX=3562 GN=SOVF_141630 PE=4 SV=1
TRINITY_DN6838_c0_g2_i6	2602	38.23	0	0.45	0	0.31	0	-8.15263	tr|A0A0K9RMN2|A0A0K9RMN2_SPIOL Uncharacterized protein OS=Spinacia oleracea OX=3562 GN=SOVF_054780 PE=4 SV=1
TRINITY_DN7019_c0_g1_i22	3629	37.77	0	0.31	0	0.22	0	-8.15263	tr|A0A0K9RIV8|A0A0K9RIV8_SPIOL Uncharacterized protein OS=Spinacia oleracea OX=3562 GN=SOVF_061660 PE=4 SV=1
TRINITY_DN7173_c0_g1_i7	1731	37.99	0	0.7	0	0.48	0	-8.15263	tr|A0A0K9RM19|A0A0K9RM19_SPIOL Uncharacterized protein OS=Spinacia oleracea OX=3562 GN=SOVF_050950 PE=4 SV=1
TRINITY_DN8249_c0_g1_i8	1870	38.11	0	0.65	0	0.45	0	-8.15263	tr|A0A0K9QV40|A0A0K9QV40_SPIOL Uncharacterized protein OS=Spinacia oleracea OX=3562 GN=SOVF_138210 PE=4 SV=1
TRINITY_DN841_c0_g1_i5	886	37.67	0	1.53	0	1.06	0	-8.15263	tr|A0A0K9QUM2|A0A0K9QUM2_SPIOL Uncharacterized protein OS=Spinacia oleracea OX=3562 GN=SOVF_139440 PE=4 SV=1
TRINITY_DN8767_c0_g1_i12	2391	38.24	0	0.5	0	0.34	0	-8.15263	tr|A0A0K9RCH8|A0A0K9RCH8_SPIOL Uncharacterized protein OS=Spinacia oleracea OX=3562 GN=SOVF_088190 PE=4 SV=1
TRINITY_DN8933_c0_g1_i1	699	38.09	0	2.11	0	1.46	0	-8.15263	tr|A0A0K9QZ91|A0A0K9QZ91_SPIOL Uncharacterized protein OS=Spinacia oleracea OX=3562 GN=SOVF_124700 PE=4 SV=1
TRINITY_DN10033_c0_g1_i3	1010	37.38	0	1.29	0	0.89	0	-8.1143	tr|A0A0K9RM22|A0A0K9RM22_SPIOL Uncharacterized protein OS=Spinacia oleracea OX=3562 GN=SOVF_051140 PE=4 SV=1
TRINITY_DN1044_c0_g1_i20	5915	37.33	0	0.19	0	0.13	0	-8.1143	tr|A0A0K9R9D0|A0A0K9R9D0_SPIOL Uncharacterized protein (Fragment) OS=Spinacia oleracea OX=3562 GN=SOVF_096440 PE=4 SV=1
TRINITY_DN10926_c0_g1_i2	1913	36.99	0	0.61	0	0.42	0	-8.1143	tr|A0A0K9QBE1|A0A0K9QBE1_SPIOL Uncharacterized protein OS=Spinacia oleracea OX=3562 GN=SOVF_203600 PE=4 SV=1
TRINITY_DN1141_c0_g1_i6	2123	37.08	0	0.55	0	0.38	0	-8.1143	tr|A0A0K9RZS4|A0A0K9RZS4_SPIOL Uncharacterized protein OS=Spinacia oleracea OX=3562 GN=SOVF_010860 PE=3 SV=1
TRINITY_DN11556_c0_g3_i4	1755	37.15	0	0.68	0	0.47	0	-8.1143	tr|A0A0K9QHH8|A0A0K9QHH8_SPIOL Uncharacterized protein OS=Spinacia oleracea OX=3562 GN=SOVF_178690 PE=4 SV=1
TRINITY_DN11631_c1_g1_i2	4252	37.41	0	0.26	0	0.18	0	-8.1143	tr|A0A0K9R978|A0A0K9R978_SPIOL WAT1-related protein OS=Spinacia oleracea OX=3562 GN=SOVF_092730 PE=3 SV=1
TRINITY_DN1320_c0_g1_i13	1866	37.36	0	0.63	0	0.44	0	-8.1143	tr|A0A0K9RTF0|A0A0K9RTF0_SPIOL Uncharacterized protein OS=Spinacia oleracea OX=3562 GN=SOVF_030520 PE=4 SV=1
TRINITY_DN1575_c0_g1_i8	1985	36.75	0	0.58	0	0.4	0	-8.1143	tr|A0A0K9R499|A0A0K9R499_SPIOL Uncharacterized protein OS=Spinacia oleracea OX=3562 GN=SOVF_108410 PE=4 SV=1
TRINITY_DN16247_c0_g3_i2	2270	37	0	0.51	0	0.35	0	-8.1143	tr|E2DMZ5|E2DMZ5_BETVU Uncharacterized protein OS=Beta vulgaris OX=161934 PE=4 SV=1
TRINITY_DN1813_c0_g1_i4	2294	36.66	0	0.5	0	0.34	0	-8.1143	tr|A0A0K9QZ85|A0A0K9QZ85_SPIOL Uncharacterized protein OS=Spinacia oleracea OX=3562 GN=SOVF_124740 PE=4 SV=1
TRINITY_DN212_c0_g1_i1	3539	36.62	0	0.31	0	0.22	0	-8.1143	tr|A0A0K9QAA0|A0A0K9QAA0_SPIOL Uncharacterized protein OS=Spinacia oleracea OX=3562 GN=SOVF_201830 PE=4 SV=1
TRINITY_DN23500_c0_g1_i12	4677	37.13	0.01	0.24	0	0.16	0	-8.1143	tr|A0A0K9R9Q1|A0A0K9R9Q1_SPIOL Uncharacterized protein OS=Spinacia oleracea OX=3562 GN=SOVF_097700 PE=4 SV=1
TRINITY_DN23949_c0_g1_i1	2521	37.48	0	0.46	0	0.32	0	-8.1143	tr|A0A0K9QRL9|A0A0K9QRL9_SPIOL Uncharacterized protein OS=Spinacia oleracea OX=3562 GN=SOVF_149400 PE=4 SV=1
TRINITY_DN26499_c0_g1_i2	2197	37	0	0.53	0	0.36	0	-8.1143	-
TRINITY_DN3418_c0_g1_i1	2317	36.93	0	0.49	0	0.34	0	-8.1143	tr|A0A0K9R9A1|A0A0K9R9A1_SPIOL Uncharacterized protein OS=Spinacia oleracea OX=3562 GN=SOVF_099040 PE=4 SV=1
TRINITY_DN3933_c0_g1_i8	2246	36.59	0	0.51	0	0.35	0	-8.1143	tr|A0A0K9Q7I6|A0A0K9Q7I6_SPIOL Uncharacterized protein OS=Spinacia oleracea OX=3562 GN=SOVF_216880 PE=3 SV=1
TRINITY_DN4012_c0_g2_i4	2021	36.9	0	0.57	0	0.4	0	-8.1143	tr|A0A0K9QLI7|A0A0K9QLI7_SPIOL Uncharacterized protein OS=Spinacia oleracea OX=3562 GN=SOVF_165420 PE=3 SV=1
TRINITY_DN411_c0_g1_i5	3923	37.48	0	0.29	0	0.2	0	-8.1143	tr|A7LIU6|A7LIU6_AMAHP Protoporphyrinogen oxidase OS=Amaranthus hypochondriacus OX=28502 GN=PPX2L PE=3 SV=1
TRINITY_DN4334_c0_g1_i11	1927	37.29	0	0.61	0	0.42	0	-8.1143	tr|A0A0K9RWU3|A0A0K9RWU3_SPIOL Uncharacterized protein OS=Spinacia oleracea OX=3562 GN=SOVF_020240 PE=4 SV=1
TRINITY_DN4717_c0_g1_i9	2594	37.09	0	0.44	0	0.3	0	-8.1143	tr|A0A0K9RAT3|A0A0K9RAT3_SPIOL Uncharacterized protein OS=Spinacia oleracea OX=3562 GN=SOVF_092930 PE=4 SV=1
TRINITY_DN492_c0_g1_i6	1941	36.53	0	0.59	0	0.41	0	-8.1143	sp|Q9XGA0|KPRS3_SPIOL Ribose-phosphate pyrophosphokinase 3, mitochondrial OS=Spinacia oleracea OX=3562 GN=PRS3 PE=2 SV=1
TRINITY_DN5013_c0_g1_i4	3562	36.56	0	0.31	0	0.21	0	-8.1143	tr|A0A0K9QQG1|A0A0K9QQG1_SPIOL Uncharacterized protein OS=Spinacia oleracea OX=3562 GN=SOVF_153000 PE=3 SV=1
TRINITY_DN5173_c0_g1_i9	4708	37.47	0	0.24	0	0.16	0	-8.1143	tr|A0A0K9QWN5|A0A0K9QWN5_SPIOL Uncharacterized protein OS=Spinacia oleracea OX=3562 GN=SOVF_139650 PE=4 SV=1
TRINITY_DN559_c0_g1_i4	2425	37.39	0	0.48	0	0.33	0	-8.1143	tr|A0A0K9QCR5|A0A0K9QCR5_SPIOL Dolichyl-diphosphooligosaccharide--protein glycosyltransferase subunit DAD1 OS=Spinacia oleracea OX=3562 GN=SOVF_193870 PE=3 SV=1
TRINITY_DN5690_c0_g1_i17	1774	36.71	0	0.66	0	0.45	0	-8.1143	tr|A0A0K9S1Z3|A0A0K9S1Z3_SPIOL Uncharacterized protein (Fragment) OS=Spinacia oleracea OX=3562 GN=SOVF_008510 PE=4 SV=1
TRINITY_DN5875_c0_g1_i15	2121	37.38	0	0.55	0	0.38	0	-8.1143	tr|A0A0K9QPX6|A0A0K9QPX6_SPIOL Uncharacterized protein OS=Spinacia oleracea OX=3562 GN=SOVF_154670 PE=4 SV=1
TRINITY_DN6187_c0_g1_i1	1519	37.3	0	0.8	0	0.55	0	-8.1143	tr|A0A0K9Q9T7|A0A0K9Q9T7_SPIOL Uncharacterized protein (Fragment) OS=Spinacia oleracea OX=3562 GN=SOVF_203570 PE=3 SV=1
TRINITY_DN6955_c0_g1_i1	3091	37.45	0	0.37	0	0.25	0	-8.1143	tr|A0A0K9QKP9|A0A0K9QKP9_SPIOL Solute carrier family 40 protein OS=Spinacia oleracea OX=3562 GN=SOVF_168330 PE=3 SV=1
TRINITY_DN712_c0_g1_i6	6537	36.75	0	0.17	0	0.11	0	-8.1143	tr|A0A0K9RM99|A0A0K9RM99_SPIOL Uncharacterized protein OS=Spinacia oleracea OX=3562 GN=SOVF_050660 PE=4 SV=1
TRINITY_DN7171_c0_g1_i15	8299	36.82	0	0.13	0	0.09	0	-8.1143	tr|A0A0J8BB58|A0A0J8BB58_BETVU Uncharacterized protein OS=Beta vulgaris subsp. vulgaris OX=3555 GN=BVRB_7g177790 PE=4 SV=1
TRINITY_DN7674_c0_g1_i7	1875	37.4	0	0.63	0	0.44	0	-8.1143	tr|A0A0K9RIL4|A0A0K9RIL4_SPIOL Uncharacterized protein (Fragment) OS=Spinacia oleracea OX=3562 GN=SOVF_067710 PE=3 SV=1
TRINITY_DN9294_c0_g1_i1	2737	36.63	0	0.41	0	0.28	0	-8.1143	tr|A0A0K9QR03|A0A0K9QR03_SPIOL Uncharacterized protein OS=Spinacia oleracea OX=3562 GN=SOVF_151730 PE=4 SV=1
TRINITY_DN9365_c0_g1_i12	3883	37.07	0	0.29	0	0.2	0	-8.1143	tr|A0A0K9QSD6|A0A0K9QSD6_SPIOL Uncharacterized protein OS=Spinacia oleracea OX=3562 GN=SOVF_153340 PE=4 SV=1
TRINITY_DN1033_c0_g2_i8	2379	35.52	0	0.46	0	0.32	0	-8.07491	tr|A0A0K9QJM7|A0A0K9QJM7_SPIOL Uncharacterized protein OS=Spinacia oleracea OX=3562 GN=SOVF_176790 PE=4 SV=1
TRINITY_DN11445_c0_g1_i7	440	35.97	0	4.01	0	2.76	0	-8.07491	-
TRINITY_DN11893_c0_g1_i3	1834	35.76	0	0.62	0	0.43	0	-8.07491	tr|A0A0K9RVR3|A0A0K9RVR3_SPIOL MLO-like protein OS=Spinacia oleracea OX=3562 GN=MLO PE=3 SV=1
TRINITY_DN1319_c1_g1_i7	3398	36.35	0	0.32	0	0.22	0	-8.07491	-
TRINITY_DN13300_c0_g1_i3	763	35.92	0	1.77	0	1.22	0	-8.07491	tr|A0A2I7ZAR1|A0A2I7ZAR1_SESPO Mitochondrial Rho GTPase OS=Sesuvium portulacastrum OX=221166 PE=2 SV=1
TRINITY_DN1414_c0_g2_i5	2535	35.93	0	0.44	0	0.3	0	-8.07491	tr|A0A0K9RSV0|A0A0K9RSV0_SPIOL Uncharacterized protein OS=Spinacia oleracea OX=3562 GN=SOVF_030930 PE=3 SV=1
TRINITY_DN1565_c0_g1_i11	1202	36.46	0	1.02	0	0.71	0	-8.07491	tr|A0A0K9R465|A0A0K9R465_SPIOL Uncharacterized protein OS=Spinacia oleracea OX=3562 GN=SOVF_108700 PE=4 SV=1
TRINITY_DN1596_c0_g1_i34	2793	36.18	0	0.4	0	0.27	0	-8.07491	tr|A0A0K9QUV6|A0A0K9QUV6_SPIOL Uncharacterized protein OS=Spinacia oleracea OX=3562 GN=SOVF_138550 PE=4 SV=1
TRINITY_DN1673_c0_g4_i1	287	36	0	9.51	0	6.56	0	-8.07491	-
TRINITY_DN23662_c0_g1_i7	1547	36.03	0	0.76	0	0.52	0	-8.07491	tr|A0A0K9R166|A0A0K9R166_SPIOL Uncharacterized protein OS=Spinacia oleracea OX=3562 GN=SOVF_118400 PE=4 SV=1
TRINITY_DN2864_c0_g1_i8	6319	36.49	0	0.17	0	0.12	0	-8.07491	tr|A0A0K9Q7V6|A0A0K9Q7V6_SPIOL Uncharacterized protein OS=Spinacia oleracea OX=3562 GN=SOVF_210110 PE=4 SV=1
TRINITY_DN5807_c0_g2_i1	2665	36.27	0	0.42	0	0.29	0	-8.07491	tr|A0A0K9RPB8|A0A0K9RPB8_SPIOL Uncharacterized protein OS=Spinacia oleracea OX=3562 GN=SOVF_043680 PE=4 SV=1
TRINITY_DN6032_c0_g2_i14	1450	35.62	0	0.8	0	0.55	0	-8.07491	tr|A0A0K9QI18|A0A0K9QI18_SPIOL Uncharacterized protein OS=Spinacia oleracea OX=3562 GN=SOVF_176730 PE=4 SV=1
TRINITY_DN6450_c1_g1_i1	1990	36.2	0	0.57	0	0.39	0	-8.07491	tr|A0A0K9RJG8|A0A0K9RJG8_SPIOL Uncharacterized protein OS=Spinacia oleracea OX=3562 GN=SOVF_060150 PE=4 SV=1
TRINITY_DN6603_c0_g2_i4	1690	35.52	0	0.67	0	0.46	0	-8.07491	tr|I6XH45|I6XH45_9CARY NAC domain-containing protein OS=Tamarix hispida OX=189793 GN=NAC17 PE=2 SV=1
TRINITY_DN7065_c0_g1_i29	6422	36.05	0	0.17	0	0.11	0	-8.07491	tr|A0A0K9QWM4|A0A0K9QWM4_SPIOL Uncharacterized protein OS=Spinacia oleracea OX=3562 GN=SOVF_133110 PE=4 SV=1
TRINITY_DN7323_c0_g1_i2	3416	36.05	0	0.32	0	0.22	0	-8.07491	tr|A0A0K9RVA2|A0A0K9RVA2_SPIOL Uncharacterized protein OS=Spinacia oleracea OX=3562 GN=SOVF_024550 PE=4 SV=1
TRINITY_DN744_c0_g1_i10	4159	35.71	0.2	0.26	0	0.18	0	-8.07491	tr|A0A0K9QZE6|A0A0K9QZE6_SPIOL Uncharacterized protein OS=Spinacia oleracea OX=3562 GN=SOVF_129140 PE=3 SV=1
TRINITY_DN8916_c0_g2_i3	1319	35.72	0	0.9	0	0.62	0	-8.07491	tr|A0A0U1YJM3|A0A0U1YJM3_AMACR DODA1 OS=Amaranthus cruentus OX=117272 PE=2 SV=1
TRINITY_DN9054_c0_g1_i8	3060	36.16	0	0.36	0	0.25	0	-8.07491	tr|A0A0K9R1U6|A0A0K9R1U6_SPIOL Uncharacterized protein OS=Spinacia oleracea OX=3562 GN=SOVF_116290 PE=4 SV=1
TRINITY_DN9182_c0_g1_i7	2214	35.72	0.04	0.5	0	0.35	0	-8.07491	tr|A0A0K9RP98|A0A0K9RP98_SPIOL Uncharacterized protein OS=Spinacia oleracea OX=3562 GN=SOVF_050030 PE=4 SV=1
TRINITY_DN11332_c0_g1_i2	1563	34.65	0	0.72	0	0.5	0	-8.03442	tr|A0A0K9QAA5|A0A0K9QAA5_SPIOL Uncharacterized protein OS=Spinacia oleracea OX=3562 GN=SOVF_201790 PE=4 SV=1
TRINITY_DN1183_c0_g2_i3	2084	35.25	0.15	0.53	0	0.37	0	-8.03442	tr|A0A0K9QEK6|A0A0K9QEK6_SPIOL Uncharacterized protein OS=Spinacia oleracea OX=3562 GN=SOVF_187910 PE=4 SV=1
TRINITY_DN1287_c0_g4_i1	836	35	0	1.53	0	1.06	0	-8.03442	-
TRINITY_DN1671_c0_g1_i1	312	35	0	7.61	0	5.25	0	-8.03442	-
TRINITY_DN17314_c0_g1_i1	2641	35.2	0	0.41	0	0.28	0	-8.03442	tr|A0A0K9QN80|A0A0K9QN80_SPIOL Uncharacterized protein OS=Spinacia oleracea OX=3562 GN=SOVF_160280 PE=4 SV=1
TRINITY_DN18918_c0_g2_i7	642	35.36	0	2.21	0	1.52	0	-8.03442	-
TRINITY_DN2076_c0_g1_i11	3944	35.39	0	0.27	0	0.19	0	-8.03442	tr|A0A0K9QRS3|A0A0K9QRS3_SPIOL Uncharacterized protein OS=Spinacia oleracea OX=3562 GN=SOVF_148890 PE=4 SV=1
TRINITY_DN21339_c1_g2_i1	762	35	0	1.73	0	1.19	0	-8.03442	-
TRINITY_DN2306_c1_g1_i3	1502	35.06	0	0.76	0	0.52	0	-8.03442	tr|A0A0K9R7F9|A0A0K9R7F9_SPIOL Uncharacterized protein OS=Spinacia oleracea OX=3562 GN=SOVF_098260 PE=4 SV=1
TRINITY_DN2398_c0_g1_i3	3877	35.34	0	0.27	0	0.19	0	-8.03442	tr|A0A0K9RF05|A0A0K9RF05_SPIOL Uncharacterized protein OS=Spinacia oleracea OX=3562 GN=SOVF_079870 PE=4 SV=1
TRINITY_DN2871_c0_g1_i13	2719	34.92	0	0.39	0	0.27	0	-8.03442	tr|A0A0K9RZU3|A0A0K9RZU3_SPIOL Lipoyl synthase, chloroplastic OS=Spinacia oleracea OX=3562 GN=LIP1P PE=3 SV=1
TRINITY_DN2892_c0_g1_i8	1699	35.26	0	0.67	0	0.46	0	-8.03442	tr|A0A0K9QWK9|A0A0K9QWK9_SPIOL Phosphoglycolate phosphatase OS=Spinacia oleracea OX=3562 GN=SOVF_133030 PE=3 SV=1
TRINITY_DN3509_c0_g1_i7	1921	35.49	0	0.58	0	0.4	0	-8.03442	tr|A0A0K9Q8H0|A0A0K9Q8H0_SPIOL Uncharacterized protein OS=Spinacia oleracea OX=3562 GN=SOVF_207770 PE=4 SV=1
TRINITY_DN4494_c0_g1_i4	574	35.46	0	2.6	0	1.79	0	-8.03442	tr|A0A0K9RA48|A0A0K9RA48_SPIOL Uncharacterized protein OS=Spinacia oleracea OX=3562 GN=SOVF_089560 PE=4 SV=1
TRINITY_DN8020_c0_g1_i7	1387	34.58	0	0.82	0	0.57	0	-8.03442	-
TRINITY_DN8444_c0_g1_i1	415	35.35	0	4.36	0	3.01	0	-8.03442	-
TRINITY_DN9253_c0_g1_i10	2259	34.95	0	0.48	0	0.33	0	-8.03442	tr|A0A0K9RVR8|A0A0K9RVR8_SPIOL Uncharacterized protein OS=Spinacia oleracea OX=3562 GN=SOVF_021770 PE=4 SV=1
TRINITY_DN10434_c0_g2_i2	1365	33.96	0	0.82	0	0.57	0	-7.99277	tr|J3SIC5|J3SIC5_BETVU Calmcium/calmodulin-dependent protein kinase CDPK2 OS=Beta vulgaris subsp. vulgaris OX=3555 PE=3 SV=1
TRINITY_DN12639_c0_g1_i2	2503	33.98	0	0.42	0	0.29	0	-7.99277	tr|A0A0K9QCG8|A0A0K9QCG8_SPIOL Uncharacterized protein OS=Spinacia oleracea OX=3562 GN=SOVF_194920 PE=3 SV=1
TRINITY_DN1715_c0_g3_i6	907	34.48	0	1.36	0	0.94	0	-7.99277	tr|A0A0K9Q7P3|A0A0K9Q7P3_SPIOL Uncharacterized protein (Fragment) OS=Spinacia oleracea OX=3562 GN=SOVF_216130 PE=4 SV=1
TRINITY_DN17519_c0_g3_i4	1507	34.25	0	0.74	0	0.51	0	-7.99277	tr|A0A0K9QC90|A0A0K9QC90_SPIOL Uncharacterized protein OS=Spinacia oleracea OX=3562 GN=SOVF_195400 PE=4 SV=1
TRINITY_DN22133_c0_g1_i2	687	34.47	0	1.96	0	1.35	0	-7.99277	tr|A0A0J8BLJ2|A0A0J8BLJ2_BETVU U3 small nucleolar RNA-associated protein 11 OS=Beta vulgaris subsp. vulgaris OX=3555 GN=BVRB_9g205930 PE=3 SV=1
TRINITY_DN22909_c0_g2_i1	3897	34.47	0	0.27	0	0.18	0	-7.99277	tr|A0A0K9S3P3|A0A0K9S3P3_SPIOL Uncharacterized protein OS=Spinacia oleracea OX=3562 GN=SOVF_002670 PE=4 SV=1
TRINITY_DN2383_c0_g1_i1	2269	34	0	0.47	0	0.32	0	-7.99277	tr|A0A0K9S224|A0A0K9S224_SPIOL Mitochondrial pyruvate carrier OS=Spinacia oleracea OX=3562 GN=SOVF_003510 PE=3 SV=1
TRINITY_DN24516_c0_g1_i5	3125	34.28	0	0.33	0	0.23	0	-7.99277	tr|A0A0K9R2I1|A0A0K9R2I1_SPIOL Adenylyl-sulfate kinase OS=Spinacia oleracea OX=3562 GN=SOVF_120490 PE=3 SV=1
TRINITY_DN24555_c0_g1_i1	2564	34.13	0	0.41	0	0.28	0	-7.99277	tr|A0A0K9RIJ0|A0A0K9RIJ0_SPIOL Uncharacterized protein OS=Spinacia oleracea OX=3562 GN=SOVF_062950 PE=3 SV=1
TRINITY_DN2596_c0_g1_i4	9519	34.45	0	0.11	0	0.07	0	-7.99277	tr|A0A0J8B5B3|A0A0J8B5B3_BETVU Uncharacterized protein OS=Beta vulgaris subsp. vulgaris OX=3555 GN=BVRB_001540 PE=4 SV=1
TRINITY_DN2923_c0_g1_i1	1425	33.68	0	0.78	0	0.53	0	-7.99277	tr|A0A0K9R3J4|A0A0K9R3J4_SPIOL Arogenate dehydratase OS=Spinacia oleracea OX=3562 GN=SOVF_117540 PE=4 SV=1
TRINITY_DN2998_c0_g1_i5	898	33.76	0	1.35	0	0.93	0	-7.99277	tr|A0A0K9QDC4|A0A0K9QDC4_SPIOL Uncharacterized protein (Fragment) OS=Spinacia oleracea OX=3562 GN=SOVF_192000 PE=4 SV=1
TRINITY_DN3274_c0_g1_i15	1552	34.19	0.01	0.71	0	0.49	0	-7.99277	-
TRINITY_DN382_c0_g2_i1	4792	34.32	0	0.21	0	0.15	0	-7.99277	tr|A0A0K9Q7F3|A0A0K9Q7F3_SPIOL Uncharacterized protein OS=Spinacia oleracea OX=3562 GN=SOVF_211930 PE=4 SV=1
TRINITY_DN3929_c0_g1_i14	2928	34.2	0	0.36	0	0.25	0	-7.99277	tr|A0A0K9QC38|A0A0K9QC38_SPIOL Phospholipase D OS=Spinacia oleracea OX=3562 GN=SOVF_201460 PE=3 SV=1
TRINITY_DN4822_c1_g1_i10	2210	34.42	0	0.49	0	0.33	0	-7.99277	tr|A0A0K9RN18|A0A0K9RN18_SPIOL Uncharacterized protein OS=Spinacia oleracea OX=3562 GN=SOVF_048350 PE=4 SV=1
TRINITY_DN5026_c0_g1_i13	3407	33.84	0	0.3	0	0.21	0	-7.99277	tr|A0A0K9R329|A0A0K9R329_SPIOL Uncharacterized protein OS=Spinacia oleracea OX=3562 GN=SOVF_117820 PE=4 SV=1
TRINITY_DN5262_c0_g1_i2	2054	34.25	0	0.52	0	0.36	0	-7.99277	tr|A0A0J8B7N7|A0A0J8B7N7_BETVU Uncharacterized protein OS=Beta vulgaris subsp. vulgaris OX=3555 GN=BVRB_005010 PE=4 SV=1
TRINITY_DN615_c0_g1_i11	2221	33.51	0	0.47	0	0.32	0	-7.99277	tr|A0A0J8B7E7|A0A0J8B7E7_BETVU Uncharacterized protein OS=Beta vulgaris subsp. vulgaris OX=3555 GN=BVRB_004110 PE=4 SV=1
TRINITY_DN620_c1_g1_i7	1048	34.44	0	1.14	0	0.79	0	-7.99277	tr|A0A0K9QYA7|A0A0K9QYA7_SPIOL Uncharacterized protein OS=Spinacia oleracea OX=3562 GN=SOVF_127740 PE=4 SV=1
TRINITY_DN6250_c0_g1_i7	480	34	0	3.28	0	2.26	0	-7.99277	-
TRINITY_DN6963_c0_g1_i1	222	33.52	0	18.2	0	12.55	0	-7.99277	tr|A0A0K9QQM2|A0A0K9QQM2_SPIOL Uncharacterized protein (Fragment) OS=Spinacia oleracea OX=3562 GN=SOVF_152480 PE=4 SV=1
TRINITY_DN7215_c0_g1_i6	2422	34.14	0	0.44	0	0.3	0	-7.99277	tr|G5DXH5|G5DXH5_SILLA Kinase-like protein (Fragment) OS=Silene latifolia OX=37657 PE=2 SV=1
TRINITY_DN8826_c0_g1_i5	1209	33.55	0	0.94	0	0.64	0	-7.99277	-
TRINITY_DN939_c1_g1_i4	2801	34.05	0	0.37	0	0.26	0	-7.99277	tr|A0A0K9RL26|A0A0K9RL26_SPIOL Uncharacterized protein OS=Spinacia oleracea OX=3562 GN=SOVF_059960 PE=3 SV=1
TRINITY_DN1718_c0_g1_i3	2273	326.02	1.24	4.46	0.02	3.07	0.01	-7.98274	tr|A0A0J8B3X6|A0A0J8B3X6_BETVU Uncharacterized protein OS=Beta vulgaris subsp. vulgaris OX=3555 GN=BVRB_003990 PE=3 SV=1
TRINITY_DN10393_c0_g1_i14	1615	32.86	0	0.66	0	0.45	0	-7.94987	tr|A0A0K9RMT2|A0A0K9RMT2_SPIOL Uncharacterized protein OS=Spinacia oleracea OX=3562 GN=SOVF_048910 PE=3 SV=1
TRINITY_DN13212_c0_g1_i1	940	33	0	1.25	0	0.86	0	-7.94987	tr|A0A0K9QJB0|A0A0K9QJB0_SPIOL Uncharacterized protein OS=Spinacia oleracea OX=3562 GN=SOVF_172860 PE=4 SV=1
TRINITY_DN13678_c0_g1_i2	3193	33.39	0.01	0.32	0	0.22	0	-7.94987	tr|A0A0K9QEJ0|A0A0K9QEJ0_SPIOL Uncharacterized protein OS=Spinacia oleracea OX=3562 GN=SOVF_188100 PE=4 SV=1
TRINITY_DN14754_c0_g1_i10	374	32.64	0	4.88	0	3.37	0	-7.94987	tr|A0A0J8B884|A0A0J8B884_BETVU Uncharacterized protein OS=Beta vulgaris subsp. vulgaris OX=3555 GN=BVRB_001440 PE=4 SV=1
TRINITY_DN15822_c0_g1_i2	2302	32.73	0	0.44	0	0.3	0	-7.94987	-
TRINITY_DN1862_c0_g2_i1	1862	32.85	0	0.56	0	0.39	0	-7.94987	tr|A0A0K9Q832|A0A0K9Q832_SPIOL Uncharacterized protein OS=Spinacia oleracea OX=3562 GN=SOVF_209310 PE=4 SV=1
TRINITY_DN18820_c0_g2_i2	1612	33.03	0	0.66	0	0.46	0	-7.94987	tr|A0A0K9RG05|A0A0K9RG05_SPIOL Uncharacterized protein OS=Spinacia oleracea OX=3562 GN=SOVF_071030 PE=4 SV=1
TRINITY_DN18888_c0_g2_i1	1479	32.8	0	0.72	0	0.5	0	-7.94987	tr|A0A0J8BDX6|A0A0J8BDX6_BETVU Uncharacterized protein OS=Beta vulgaris subsp. vulgaris OX=3555 GN=BVRB_4g094950 PE=3 SV=1
TRINITY_DN1904_c0_g1_i1	3225	33.14	0	0.31	0	0.21	0	-7.94987	tr|A0A0J8CKJ8|A0A0J8CKJ8_BETVU Uncharacterized protein OS=Beta vulgaris subsp. vulgaris OX=3555 GN=BVRB_4g076260 PE=4 SV=1
TRINITY_DN1928_c1_g1_i1	2725	33.06	0	0.37	0	0.26	0	-7.94987	tr|A0A0K9RHF1|A0A0K9RHF1_SPIOL Diacylglycerol kinase OS=Spinacia oleracea OX=3562 GN=SOVF_072410 PE=3 SV=1
TRINITY_DN1958_c0_g1_i6	2402	33.15	0	0.43	0	0.29	0	-7.94987	tr|A0A0K9QC17|A0A0K9QC17_SPIOL Uncharacterized protein OS=Spinacia oleracea OX=3562 GN=SOVF_196340 PE=4 SV=1
TRINITY_DN2278_c0_g1_i1	1618	33.35	0.14	0.66	0	0.46	0	-7.94987	tr|A0A0K9S334|A0A0K9S334_SPIOL Gluconokinase OS=Spinacia oleracea OX=3562 GN=SOVF_005520 PE=3 SV=1
TRINITY_DN2471_c0_g1_i17	1928	32.79	0.1	0.54	0	0.37	0	-7.94987	tr|A0A0K9RAU0|A0A0K9RAU0_SPIOL Uncharacterized protein OS=Spinacia oleracea OX=3562 GN=SOVF_087660 PE=4 SV=1
TRINITY_DN2503_c0_g1_i4	3593	33.09	0.21	0.28	0	0.19	0	-7.94987	tr|A0A0K9S1J2|A0A0K9S1J2_SPIOL Uncharacterized protein OS=Spinacia oleracea OX=3562 GN=SOVF_010090 PE=4 SV=1
TRINITY_DN257_c0_g1_i6	325	32.72	0	6.51	0	4.49	0	-7.94987	-
TRINITY_DN2695_c0_g2_i5	1327	33.28	0	0.83	0	0.57	0	-7.94987	tr|A0A0K9RYY2|A0A0K9RYY2_SPIOL Alpha-1,3-glucosyltransferase OS=Spinacia oleracea OX=3562 GN=SOVF_018370 PE=3 SV=1
TRINITY_DN35008_c0_g1_i1	1167	33	0	0.96	0	0.66	0	-7.94987	tr|A0A0K9Q6T8|A0A0K9Q6T8_SPIOL Uncharacterized protein (Fragment) OS=Spinacia oleracea OX=3562 GN=SOVF_215280 PE=4 SV=1
TRINITY_DN3969_c0_g1_i3	3097	32.89	0	0.32	0	0.22	0	-7.94987	tr|A0A0K9S3Y0|A0A0K9S3Y0_SPIOL Uncharacterized protein OS=Spinacia oleracea OX=3562 GN=SOVF_002940 PE=4 SV=1
TRINITY_DN3986_c1_g2_i6	2539	33.47	0	0.41	0	0.28	0	-7.94987	tr|A0A0K9RAY1|A0A0K9RAY1_SPIOL Uncharacterized protein OS=Spinacia oleracea OX=3562 GN=SOVF_087010 PE=4 SV=1
TRINITY_DN4727_c0_g1_i12	2969	32.54	0	0.33	0	0.23	0	-7.94987	tr|A0A0K9RHK7|A0A0K9RHK7_SPIOL Uncharacterized protein OS=Spinacia oleracea OX=3562 GN=SOVF_065790 PE=4 SV=1
TRINITY_DN4976_c0_g2_i8	396	32.87	0	4.42	0	3.04	0	-7.94987	-
TRINITY_DN5190_c0_g2_i2	2133	32.67	0.35	0.48	0.01	0.33	0	-7.94987	tr|A0A0K9RDQ9|A0A0K9RDQ9_SPIOL Uncharacterized protein OS=Spinacia oleracea OX=3562 GN=SOVF_077820 PE=3 SV=1
TRINITY_DN543_c0_g1_i11	3164	33	0	0.32	0	0.22	0	-7.94987	tr|A0A0K9R9W9|A0A0K9R9W9_SPIOL Uncharacterized protein OS=Spinacia oleracea OX=3562 GN=SOVF_090170 PE=4 SV=1
TRINITY_DN5858_c1_g1_i5	3161	32.61	0	0.31	0	0.22	0	-7.94987	tr|A0A0K9RCV3|A0A0K9RCV3_SPIOL Uncharacterized protein OS=Spinacia oleracea OX=3562 GN=SOVF_081040 PE=4 SV=1
TRINITY_DN8276_c1_g1_i4	942	33.05	0	1.25	0	0.86	0	-7.94987	-
TRINITY_DN8454_c0_g1_i4	3547	32.74	0	0.28	0	0.19	0	-7.94987	tr|A0A0K9QDR4|A0A0K9QDR4_SPIOL Uncharacterized protein OS=Spinacia oleracea OX=3562 GN=SOVF_190640 PE=4 SV=1
TRINITY_DN9111_c0_g1_i16	3689	33.49	0	0.27	0	0.19	0	-7.94987	tr|A0A0K9QDD9|A0A0K9QDD9_SPIOL Uncharacterized protein OS=Spinacia oleracea OX=3562 GN=SOVF_191860 PE=4 SV=1
TRINITY_DN9786_c0_g2_i3	292	32.87	0	8.33	0	5.75	0	-7.94987	-
TRINITY_DN11037_c0_g1_i15	1125	32.33	0	0.98	0	0.68	0	-7.90566	tr|A0A0K9QG76|A0A0K9QG76_SPIOL Uncharacterized protein OS=Spinacia oleracea OX=3562 GN=SOVF_188200 PE=4 SV=1
TRINITY_DN13713_c0_g4_i2	397	32.45	0.02	4.34	0	2.99	0	-7.90566	-
TRINITY_DN13750_c0_g1_i9	779	32.13	0	1.54	0	1.06	0	-7.90566	tr|A0A0K9R3L1|A0A0K9R3L1_SPIOL Uncharacterized protein OS=Spinacia oleracea OX=3562 GN=SOVF_115840 PE=4 SV=1
TRINITY_DN1415_c1_g1_i6	5816	32.01	0	0.16	0	0.11	0	-7.90566	tr|A0A0K9QTI7|A0A0K9QTI7_SPIOL Uncharacterized protein OS=Spinacia oleracea OX=3562 GN=SOVF_143190 PE=4 SV=1
TRINITY_DN1527_c0_g1_i15	1512	32.02	0	0.69	0	0.48	0	-7.90566	-
TRINITY_DN158_c0_g1_i3	1708	32.06	0	0.6	0	0.41	0	-7.90566	tr|A0A0K9R7H9|A0A0K9R7H9_SPIOL Uncharacterized protein OS=Spinacia oleracea OX=3562 GN=SOVF_098140 PE=4 SV=1
TRINITY_DN161_c0_g1_i23	5487	32.29	0	0.17	0	0.12	0	-7.90566	tr|A0A0K9RCT4|A0A0K9RCT4_SPIOL Uncharacterized protein OS=Spinacia oleracea OX=3562 GN=SOVF_081340 PE=4 SV=1
TRINITY_DN1641_c0_g1_i1	486	32.03	0	3.03	0	2.09	0	-7.90566	-
TRINITY_DN1654_c1_g1_i3	1891	32.16	0	0.54	0	0.37	0	-7.90566	tr|A0A0K9S2H6|A0A0K9S2H6_SPIOL Uncharacterized protein OS=Spinacia oleracea OX=3562 GN=SOVF_007500 PE=4 SV=1
TRINITY_DN17662_c0_g1_i39	4032	31.72	0	0.24	0	0.16	0	-7.90566	tr|A0A0K9Q769|A0A0K9Q769_SPIOL Uncharacterized protein OS=Spinacia oleracea OX=3562 GN=SOVF_213340 PE=4 SV=1
TRINITY_DN1982_c1_g1_i16	233	32.1	0	14.96	0	10.31	0	-7.90566	-
TRINITY_DN2352_c0_g1_i5	1198	31.5	0	0.89	0	0.61	0	-7.90566	tr|A0A0K9QVN8|A0A0K9QVN8_SPIOL Uncharacterized protein OS=Spinacia oleracea OX=3562 GN=SOVF_141250 PE=4 SV=1
TRINITY_DN2741_c0_g2_i6	2235	31.63	0	0.44	0	0.3	0	-7.90566	tr|A0A0K9QBV7|A0A0K9QBV7_SPIOL Uncharacterized protein OS=Spinacia oleracea OX=3562 GN=SOVF_196760 PE=4 SV=1
TRINITY_DN2869_c0_g1_i5	1769	32.27	0	0.58	0	0.4	0	-7.90566	tr|A0A0K9QN93|A0A0K9QN93_SPIOL Uncharacterized protein OS=Spinacia oleracea OX=3562 GN=SOVF_160220 PE=4 SV=1
TRINITY_DN3418_c0_g1_i4	2045	32.01	0	0.49	0	0.34	0	-7.90566	tr|A0A0K9R9A1|A0A0K9R9A1_SPIOL Uncharacterized protein OS=Spinacia oleracea OX=3562 GN=SOVF_099040 PE=4 SV=1
TRINITY_DN3434_c0_g1_i2	1188	31.72	0	0.9	0	0.62	0	-7.90566	tr|A0A0K9QF25|A0A0K9QF25_SPIOL Uncharacterized protein OS=Spinacia oleracea OX=3562 GN=SOVF_186410 PE=4 SV=1
TRINITY_DN3832_c0_g3_i2	1366	31.96	0.01	0.77	0	0.53	0	-7.90566	tr|A0A0K9RQB9|A0A0K9RQB9_SPIOL Uncharacterized protein OS=Spinacia oleracea OX=3562 GN=SOVF_046420 PE=4 SV=1
TRINITY_DN4159_c0_g1_i6	2166	31.94	0.01	0.46	0	0.32	0	-7.90566	tr|A0A0K9QRS0|A0A0K9QRS0_SPIOL Uncharacterized protein (Fragment) OS=Spinacia oleracea OX=3562 GN=SOVF_148390 PE=4 SV=1
TRINITY_DN4630_c0_g1_i8	2593	31.94	0	0.38	0	0.26	0	-7.90566	tr|A0A0K9QS66|A0A0K9QS66_SPIOL Peroxidase OS=Spinacia oleracea OX=3562 GN=SOVF_152660 PE=3 SV=1
TRINITY_DN4738_c0_g1_i10	2159	31.51	0	0.46	0	0.31	0	-7.90566	tr|A0A0K9QS37|A0A0K9QS37_SPIOL Uncharacterized protein (Fragment) OS=Spinacia oleracea OX=3562 GN=SOVF_152910 PE=3 SV=1
TRINITY_DN4783_c0_g2_i2	1303	31.55	0	0.81	0	0.56	0	-7.90566	tr|A0A0K9RXU2|A0A0K9RXU2_SPIOL Uncharacterized protein OS=Spinacia oleracea OX=3562 GN=SOVF_017200 PE=4 SV=1
TRINITY_DN5285_c0_g2_i1	613	32.31	0	2.15	0	1.48	0	-7.90566	-
TRINITY_DN5549_c0_g1_i1	2252	32.45	0	0.45	0	0.31	0	-7.90566	tr|A0A0K9RS60|A0A0K9RS60_SPIOL Uncharacterized protein OS=Spinacia oleracea OX=3562 GN=SOVF_034400 PE=3 SV=1
TRINITY_DN5768_c1_g2_i11	1313	32.42	0	0.82	0	0.57	0	-7.90566	-
TRINITY_DN6210_c0_g1_i6	4152	32.2	0	0.23	0	0.16	0	-7.90566	tr|A0A0J8E279|A0A0J8E279_BETVU Calcium-transporting ATPase OS=Beta vulgaris subsp. vulgaris OX=3555 GN=BVRB_7g177670 PE=3 SV=1
TRINITY_DN6978_c0_g1_i6	3386	32.22	0	0.29	0	0.2	0	-7.90566	-
TRINITY_DN7223_c0_g1_i4	5909	32.09	0	0.16	0	0.11	0	-7.90566	tr|A0FD17|A0FD17_BETVU NBS-LRR type resistance protein OS=Beta vulgaris OX=161934 PE=2 SV=1
TRINITY_DN7354_c0_g1_i30	2050	31.91	0	0.49	0	0.34	0	-7.90566	tr|A0A0K9RC11|A0A0K9RC11_SPIOL Uncharacterized protein OS=Spinacia oleracea OX=3562 GN=SOVF_083770 PE=4 SV=1
TRINITY_DN7404_c0_g1_i9	2745	32.48	0	0.36	0	0.25	0	-7.90566	tr|A0A0K9R6B5|A0A0K9R6B5_SPIOL Uncharacterized protein OS=Spinacia oleracea OX=3562 GN=SOVF_107170 PE=4 SV=1
TRINITY_DN8474_c0_g1_i2	2055	31.86	0	0.49	0	0.34	0	-7.90566	tr|A0A0K9R5J8|A0A0K9R5J8_SPIOL Uncharacterized protein OS=Spinacia oleracea OX=3562 GN=SOVF_104360 PE=4 SV=1
TRINITY_DN8556_c0_g1_i3	1350	31.72	0	0.78	0	0.54	0	-7.90566	tr|A0A0K9QSJ0|A0A0K9QSJ0_SPIOL Uncharacterized protein OS=Spinacia oleracea OX=3562 GN=SOVF_151690 PE=4 SV=1
TRINITY_DN2138_c0_g1_i3	3276	307.6	0.92	2.84	0.01	1.96	0.01	-7.90083	tr|A0A0K9QDP9|A0A0K9QDP9_SPIOL Uncharacterized protein OS=Spinacia oleracea OX=3562 GN=SOVF_190690 PE=4 SV=1
TRINITY_DN1022_c0_g2_i9	2080	31.17	0	0.47	0	0.32	0	-7.86005	tr|A0A0K9QQB6|A0A0K9QQB6_SPIOL Uncharacterized protein OS=Spinacia oleracea OX=3562 GN=SOVF_153540 PE=4 SV=1
TRINITY_DN1103_c0_g1_i2	3428	30.72	0	0.27	0	0.19	0	-7.86005	tr|A0A0K9RU36|A0A0K9RU36_SPIOL Uncharacterized protein (Fragment) OS=Spinacia oleracea OX=3562 GN=SOVF_029030 PE=4 SV=1
TRINITY_DN11599_c0_g2_i2	1006	31.43	0	1.09	0	0.75	0	-7.86005	-
TRINITY_DN11940_c0_g1_i13	2897	30.58	0	0.32	0	0.22	0	-7.86005	tr|A0A0K9QGS3|A0A0K9QGS3_SPIOL Uncharacterized protein OS=Spinacia oleracea OX=3562 GN=SOVF_186090 PE=4 SV=1
TRINITY_DN11978_c0_g1_i1	3405	30.67	0	0.27	0	0.19	0	-7.86005	-
TRINITY_DN1257_c0_g4_i3	1798	31.33	0	0.55	0	0.38	0	-7.86005	tr|A0A0K9QXI0|A0A0K9QXI0_SPIOL Uncharacterized protein OS=Spinacia oleracea OX=3562 GN=SOVF_137240 PE=4 SV=1
TRINITY_DN12696_c0_g1_i2	2178	31	0	0.44	0	0.31	0	-7.86005	tr|A0A0J8B754|A0A0J8B754_BETVU Uncharacterized protein OS=Beta vulgaris subsp. vulgaris OX=3555 GN=BVRB_005020 PE=4 SV=1
TRINITY_DN1336_c0_g1_i21	7087	31.37	0	0.13	0	0.09	0	-7.86005	tr|A0A0K9QJV3|A0A0K9QJV3_SPIOL Uncharacterized protein OS=Spinacia oleracea OX=3562 GN=SOVF_171080 PE=3 SV=1
TRINITY_DN14129_c0_g1_i5	3279	31.36	0	0.29	0	0.2	0	-7.86005	tr|G5DWM5|G5DWM5_SILLA Acyl-CoA N-acyltransferase with RING/FYVE/PHD-type zinc finger protein (Fragment) OS=Silene latifolia OX=37657 PE=2 SV=1
TRINITY_DN15373_c0_g1_i2	3562	31.05	0	0.26	0	0.18	0	-7.86005	tr|A0A0K9RG29|A0A0K9RG29_SPIOL Uncharacterized protein OS=Spinacia oleracea OX=3562 GN=SOVF_076890 PE=4 SV=1
TRINITY_DN1570_c1_g1_i6	1776	31.48	0	0.56	0	0.39	0	-7.86005	tr|A0A0K9QNT4|A0A0K9QNT4_SPIOL Uncharacterized protein OS=Spinacia oleracea OX=3562 GN=SOVF_158470 PE=4 SV=1
TRINITY_DN16028_c0_g1_i12	1658	31.11	0	0.6	0	0.42	0	-7.86005	tr|A0A0K9QA24|A0A0K9QA24_SPIOL MLO-like protein OS=Spinacia oleracea OX=3562 GN=MLO PE=3 SV=1
TRINITY_DN17303_c0_g1_i2	2002	31	0	0.49	0	0.34	0	-7.86005	tr|A0A0K9R378|A0A0K9R378_SPIOL Uncharacterized protein OS=Spinacia oleracea OX=3562 GN=SOVF_118600 PE=4 SV=1
TRINITY_DN17723_c0_g1_i3	861	30.54	0	1.29	0	0.89	0	-7.86005	-
TRINITY_DN1829_c0_g3_i3	2103	31	0	0.46	0	0.32	0	-7.86005	tr|A0A0K9RFW5|A0A0K9RFW5_SPIOL Uncharacterized protein OS=Spinacia oleracea OX=3562 GN=SOVF_071260 PE=4 SV=1
TRINITY_DN1904_c0_g1_i16	4840	30.53	0	0.19	0	0.13	0	-7.86005	tr|A0A0J8CKJ8|A0A0J8CKJ8_BETVU Uncharacterized protein OS=Beta vulgaris subsp. vulgaris OX=3555 GN=BVRB_4g076260 PE=4 SV=1
TRINITY_DN21145_c0_g2_i3	289	31.08	0	8.08	0	5.57	0	-7.86005	tr|A0A0K9RFQ8|A0A0K9RFQ8_SPIOL Uncharacterized protein OS=Spinacia oleracea OX=3562 GN=SOVF_076290 PE=4 SV=1
TRINITY_DN2127_c0_g1_i20	4215	31.2	0	0.22	0	0.15	0	-7.86005	tr|A0A0K9QTE8|A0A0K9QTE8_SPIOL Uncharacterized protein OS=Spinacia oleracea OX=3562 GN=SOVF_143210 PE=3 SV=1
TRINITY_DN2141_c0_g1_i1	1909	30.77	0	0.51	0	0.35	0	-7.86005	tr|A0A0K9QXM4|A0A0K9QXM4_SPIOL Uncharacterized protein OS=Spinacia oleracea OX=3562 GN=SOVF_136820 PE=3 SV=1
TRINITY_DN2179_c0_g1_i8	3069	31.18	0.03	0.31	0	0.21	0	-7.86005	tr|A0A0K9RF68|A0A0K9RF68_SPIOL Uncharacterized protein OS=Spinacia oleracea OX=3562 GN=SOVF_078750 PE=4 SV=1
TRINITY_DN23243_c0_g1_i1	2708	30.83	0.19	0.35	0	0.24	0	-7.86005	tr|A0A0K9RLS9|A0A0K9RLS9_SPIOL Uncharacterized protein OS=Spinacia oleracea OX=3562 GN=SOVF_051820 PE=4 SV=1
TRINITY_DN2582_c1_g1_i19	2461	30.58	0	0.38	0	0.26	0	-7.86005	tr|A0A0K9R7L7|A0A0K9R7L7_SPIOL Uncharacterized protein OS=Spinacia oleracea OX=3562 GN=SOVF_102150 PE=4 SV=1
TRINITY_DN2622_c1_g1_i34	2038	31.27	0	0.48	0	0.33	0	-7.86005	tr|A0A0K9QRI6|A0A0K9QRI6_SPIOL Eukaryotic translation initiation factor 3 subunit K OS=Spinacia oleracea OX=3562 GN=SOVF_149660 PE=3 SV=1
TRINITY_DN2951_c0_g1_i5	2750	30.84	0	0.34	0	0.24	0	-7.86005	tr|A0A0K9R7V0|A0A0K9R7V0_SPIOL Uncharacterized protein OS=Spinacia oleracea OX=3562 GN=SOVF_096910 PE=4 SV=1
TRINITY_DN3016_c0_g1_i5	461	31.46	0	3.24	0	2.24	0	-7.86005	tr|Q8LL67|Q8LL67_AMAHP Polyamine oxidase OS=Amaranthus hypochondriacus OX=28502 PE=2 SV=1
TRINITY_DN3630_c0_g2_i4	1077	30.82	0	0.99	0	0.68	0	-7.86005	tr|A0A0K9Q7Z5|A0A0K9Q7Z5_SPIOL Uncharacterized protein OS=Spinacia oleracea OX=3562 GN=SOVF_209390 PE=4 SV=1
TRINITY_DN379_c0_g1_i6	2298	30.73	0	0.42	0	0.29	0	-7.86005	tr|A0A0K9S1Q1|A0A0K9S1Q1_SPIOL Uncharacterized protein OS=Spinacia oleracea OX=3562 GN=SOVF_004390 PE=4 SV=1
TRINITY_DN4368_c1_g1_i4	4021	31.35	0	0.23	0	0.16	0	-7.86005	tr|A0A0K9RW19|A0A0K9RW19_SPIOL Uncharacterized protein OS=Spinacia oleracea OX=3562 GN=SOVF_021620 PE=4 SV=1
TRINITY_DN4428_c1_g1_i8	1083	30.61	0	0.97	0	0.67	0	-7.86005	tr|F4MLC7|F4MLC7_BETVM Uncharacterized protein OS=Beta vulgaris subsp. maritima OX=350892 GN=orf266 PE=4 SV=1
TRINITY_DN5093_c1_g1_i5	2038	31.06	0	0.48	0	0.33	0	-7.86005	tr|A0A0K9RCM3|A0A0K9RCM3_SPIOL Uncharacterized protein OS=Spinacia oleracea OX=3562 GN=SOVF_081660 PE=4 SV=1
TRINITY_DN5394_c0_g1_i9	928	31.16	0	1.2	0	0.83	0	-7.86005	tr|A0A0K9RQ48|A0A0K9RQ48_SPIOL Uncharacterized protein OS=Spinacia oleracea OX=3562 GN=SOVF_041390 PE=4 SV=1
TRINITY_DN5497_c1_g1_i9	596	30.98	0	2.15	0	1.48	0	-7.86005	-
TRINITY_DN5835_c0_g1_i8	2215	30.52	0	0.43	0	0.3	0	-7.86005	tr|A0A0K9R8Y0|A0A0K9R8Y0_SPIOL Uncharacterized protein OS=Spinacia oleracea OX=3562 GN=SOVF_093090 PE=4 SV=1
TRINITY_DN6996_c2_g1_i1	209	31.03	0	20.67	0	14.25	0	-7.86005	tr|A0A0K9QD29|A0A0K9QD29_SPIOL Uncharacterized protein (Fragment) OS=Spinacia oleracea OX=3562 GN=SOVF_192950 PE=4 SV=1
TRINITY_DN8137_c0_g1_i1	2346	31.04	0	0.41	0	0.28	0	-7.86005	tr|A0A0K9RAZ0|A0A0K9RAZ0_SPIOL Flavin-containing monooxygenase OS=Spinacia oleracea OX=3562 GN=SOVF_087100 PE=3 SV=1
TRINITY_DN8137_c0_g1_i11	1998	31.37	0	0.49	0	0.34	0	-7.86005	tr|A0A0K9RAZ0|A0A0K9RAZ0_SPIOL Flavin-containing monooxygenase OS=Spinacia oleracea OX=3562 GN=SOVF_087100 PE=3 SV=1
TRINITY_DN8429_c0_g1_i6	2090	30.61	0	0.46	0	0.32	0	-7.86005	tr|A0A0K9RXX2|A0A0K9RXX2_SPIOL Uncharacterized protein OS=Spinacia oleracea OX=3562 GN=SOVF_016680 PE=4 SV=1
TRINITY_DN8746_c0_g1_i3	1246	30.62	0	0.82	0	0.57	0	-7.86005	tr|A0A0K9QGL2|A0A0K9QGL2_SPIOL Uncharacterized protein OS=Spinacia oleracea OX=3562 GN=SOVF_181160 PE=3 SV=1
TRINITY_DN3178_c0_g2_i3	3991	562.65	2.04	4.22	0.02	2.91	0.01	-7.84775	tr|A0A0K9QWY4|A0A0K9QWY4_SPIOL Uncharacterized protein OS=Spinacia oleracea OX=3562 GN=SOVF_138830 PE=4 SV=1
TRINITY_DN1098_c1_g1_i4	1592	29.82	0	0.61	0	0.42	0	-7.81295	tr|A0A0K9S1Q3|A0A0K9S1Q3_SPIOL Uncharacterized protein OS=Spinacia oleracea OX=3562 GN=SOVF_004350 PE=4 SV=1
TRINITY_DN11513_c1_g1_i2	666	30	0	1.78	0	1.23	0	-7.81295	tr|E7BQD4|E7BQD4_SILLA Gag-pol polyprotein OS=Silene latifolia OX=37657 PE=4 SV=1
TRINITY_DN1157_c1_g1_i16	1745	29.78	0	0.55	0	0.38	0	-7.81295	tr|A0A0K9RI90|A0A0K9RI90_SPIOL Uncharacterized protein OS=Spinacia oleracea OX=3562 GN=SOVF_069020 PE=4 SV=1
TRINITY_DN12618_c0_g1_i1	1883	29.83	0	0.5	0	0.35	0	-7.81295	tr|A0A0K9QF99|A0A0K9QF99_SPIOL DNA-(apurinic or apyrimidinic site) lyase OS=Spinacia oleracea OX=3562 GN=SOVF_185690 PE=3 SV=1
TRINITY_DN1286_c0_g1_i4	1714	30.42	0	0.57	0	0.39	0	-7.81295	tr|A0A0K9R385|A0A0K9R385_SPIOL Uncharacterized protein OS=Spinacia oleracea OX=3562 GN=SOVF_111690 PE=4 SV=1
TRINITY_DN13035_c0_g1_i22	2009	29.57	0	0.46	0	0.32	0	-7.81295	tr|A0A0K9QKE2|A0A0K9QKE2_SPIOL Uncharacterized protein OS=Spinacia oleracea OX=3562 GN=SOVF_169370 PE=3 SV=1
TRINITY_DN1414_c0_g2_i4	3650	30.33	0	0.25	0	0.17	0	-7.81295	tr|A0A0K9RSV0|A0A0K9RSV0_SPIOL Uncharacterized protein OS=Spinacia oleracea OX=3562 GN=SOVF_030930 PE=3 SV=1
TRINITY_DN14930_c0_g1_i24	3704	29.72	0	0.24	0	0.17	0	-7.81295	-
TRINITY_DN1506_c0_g1_i5	2774	29.55	0	0.33	0	0.22	0	-7.81295	tr|A0A0K9RHJ6|A0A0K9RHJ6_SPIOL Uncharacterized protein OS=Spinacia oleracea OX=3562 GN=SOVF_066060 PE=4 SV=1
TRINITY_DN157_c0_g1_i20	2020	30.13	0	0.47	0	0.32	0	-7.81295	tr|A0A0K9R9T7|A0A0K9R9T7_SPIOL Uncharacterized protein OS=Spinacia oleracea OX=3562 GN=SOVF_097130 PE=4 SV=1
TRINITY_DN17192_c0_g1_i6	522	29.77	0	2.52	0	1.74	0	-7.81295	-
TRINITY_DN17540_c0_g4_i4	1020	30.39	0	1.04	0	0.72	0	-7.81295	tr|A0A0K9RUK3|A0A0K9RUK3_SPIOL Uncharacterized protein OS=Spinacia oleracea OX=3562 GN=SOVF_033500 PE=4 SV=1
TRINITY_DN1767_c0_g6_i4	2865	30.02	0	0.32	0	0.22	0	-7.81295	tr|A0A0K9S2S7|A0A0K9S2S7_SPIOL Uncharacterized protein OS=Spinacia oleracea OX=3562 GN=SOVF_001160 PE=4 SV=1
TRINITY_DN21859_c0_g1_i4	1827	30.14	0	0.52	0	0.36	0	-7.81295	tr|A0A0K9QIH9|A0A0K9QIH9_SPIOL Uncharacterized protein OS=Spinacia oleracea OX=3562 GN=SOVF_175460 PE=4 SV=1
TRINITY_DN2455_c0_g3_i2	2143	30.28	0	0.44	0	0.3	0	-7.81295	-
TRINITY_DN2509_c0_g2_i4	7495	29.77	0	0.12	0	0.08	0	-7.81295	tr|A0A0K9QG81|A0A0K9QG81_SPIOL Uncharacterized protein OS=Spinacia oleracea OX=3562 GN=SOVF_188110 PE=4 SV=1
TRINITY_DN2709_c0_g1_i9	3944	29.64	0	0.23	0	0.16	0	-7.81295	tr|A0A0K9RQV9|A0A0K9RQV9_SPIOL Uncharacterized protein OS=Spinacia oleracea OX=3562 GN=SOVF_045360 PE=4 SV=1
TRINITY_DN3179_c0_g1_i12	2240	30.45	0	0.42	0	0.29	0	-7.81295	tr|A0A0K9QFW3|A0A0K9QFW3_SPIOL Uncharacterized protein OS=Spinacia oleracea OX=3562 GN=SOVF_183910 PE=4 SV=1
TRINITY_DN380_c1_g1_i14	4202	30.12	0	0.21	0	0.15	0	-7.81295	tr|A0A0K9Q9U9|A0A0K9Q9U9_SPIOL Potassium transporter OS=Spinacia oleracea OX=3562 GN=SOVF_203260 PE=3 SV=1
TRINITY_DN3974_c0_g1_i1	1087	29.85	0	0.94	0	0.65	0	-7.81295	tr|A0A0K9R5V1|A0A0K9R5V1_SPIOL Uncharacterized protein OS=Spinacia oleracea OX=3562 GN=SOVF_109940 PE=4 SV=1
TRINITY_DN4009_c0_g1_i2	2237	29.91	0	0.42	0	0.29	0	-7.81295	tr|A0A0K9QHJ2|A0A0K9QHJ2_SPIOL Uncharacterized protein OS=Spinacia oleracea OX=3562 GN=SOVF_184490 PE=4 SV=1
TRINITY_DN4052_c0_g1_i1	848	29.73	0	1.28	0	0.88	0	-7.81295	tr|Q66ZP3|Q66ZP3_CHEMU Putative heavy-metal-associated domain-containing protein (Fragment) OS=Chenopodiastrum murale OX=46091 PE=2 SV=1
TRINITY_DN4583_c0_g1_i2	2486	29.81	0.16	0.37	0	0.26	0	-7.81295	tr|A0A0K9REQ4|A0A0K9REQ4_SPIOL Carboxypeptidase OS=Spinacia oleracea OX=3562 GN=SOVF_075210 PE=3 SV=1
TRINITY_DN5495_c0_g1_i11	2051	30.21	0	0.46	0	0.32	0	-7.81295	tr|A0A0K9QM09|A0A0K9QM09_SPIOL Phosphatidylinositol N-acetylglucosaminyltransferase subunit P OS=Spinacia oleracea OX=3562 GN=SOVF_169300 PE=3 SV=1
TRINITY_DN7494_c0_g1_i2	3096	29.54	0	0.29	0	0.2	0	-7.81295	tr|G5DWC4|G5DWC4_SILLA Argonaute family protein (Fragment) OS=Silene latifolia OX=37657 PE=2 SV=1
TRINITY_DN7644_c0_g1_i2	559	29.8	0	2.27	0	1.57	0	-7.81295	tr|A0A0K9QTH3|A0A0K9QTH3_SPIOL Uncharacterized protein OS=Spinacia oleracea OX=3562 GN=SOVF_143360 PE=3 SV=1
TRINITY_DN7815_c0_g1_i8	5819	30.13	0	0.15	0	0.11	0	-7.81295	tr|A0A0J8E3M7|A0A0J8E3M7_BETVU Uncharacterized protein OS=Beta vulgaris subsp. vulgaris OX=3555 GN=BVRB_5g124350 PE=4 SV=1
TRINITY_DN811_c0_g1_i9	4903	29.58	0	0.18	0	0.12	0	-7.81295	tr|A0A0K9QVB8|A0A0K9QVB8_SPIOL Uncharacterized protein OS=Spinacia oleracea OX=3562 GN=SOVF_137390 PE=4 SV=1
TRINITY_DN8273_c0_g1_i3	1134	29.68	0	0.89	0	0.62	0	-7.81295	tr|A0A0K9RML6|A0A0K9RML6_SPIOL Phospholipase D OS=Spinacia oleracea OX=3562 GN=SOVF_049470 PE=3 SV=1
TRINITY_DN8666_c0_g1_i2	3780	29.87	0	0.24	0	0.16	0	-7.81295	tr|A0A0K9QZI8|A0A0K9QZI8_SPIOL Uncharacterized protein OS=Spinacia oleracea OX=3562 GN=SOVF_123720 PE=4 SV=1
TRINITY_DN8904_c0_g1_i3	2503	30.1	0	0.37	0	0.26	0	-7.81295	tr|A0A0K9RV25|A0A0K9RV25_SPIOL Uncharacterized protein OS=Spinacia oleracea OX=3562 GN=SOVF_031400 PE=4 SV=1
TRINITY_DN8914_c0_g2_i1	695	30.21	0	1.69	0	1.16	0	-7.81295	-
TRINITY_DN1039_c0_g1_i2	2156	28.96	0	0.42	0	0.29	0	-7.76426	tr|A0A0K9QB72|A0A0K9QB72_SPIOL Uncharacterized protein OS=Spinacia oleracea OX=3562 GN=SOVF_198890 PE=4 SV=1
TRINITY_DN1053_c0_g1_i6	729	28.97	0	1.52	0	1.05	0	-7.76426	tr|A0A0K9Q9V0|A0A0K9Q9V0_SPIOL Uncharacterized protein (Fragment) OS=Spinacia oleracea OX=3562 GN=SOVF_203440 PE=4 SV=1
TRINITY_DN12285_c0_g3_i1	545	28.55	0	2.26	0	1.56	0	-7.76426	-
TRINITY_DN14626_c1_g1_i9	1223	29.16	0	0.8	0	0.55	0	-7.76426	-
TRINITY_DN1480_c2_g1_i5	2288	29.07	0	0.39	0	0.27	0	-7.76426	tr|A0A0K9RX80|A0A0K9RX80_SPIOL Uncharacterized protein OS=Spinacia oleracea OX=3562 GN=SOVF_023930 PE=4 SV=1
TRINITY_DN16035_c0_g1_i6	1463	28.75	0	0.64	0	0.44	0	-7.76426	tr|A0A0J8D1W9|A0A0J8D1W9_BETVU Uncharacterized protein OS=Beta vulgaris subsp. vulgaris OX=3555 GN=BVRB_2g031870 PE=4 SV=1
TRINITY_DN18213_c0_g1_i2	1134	29	0	0.87	0	0.6	0	-7.76426	-
TRINITY_DN1848_c0_g1_i10	3011	29.24	0	0.3	0	0.2	0	-7.76426	tr|A0A0K9QQI5|A0A0K9QQI5_SPIOL Uncharacterized protein OS=Spinacia oleracea OX=3562 GN=SOVF_158100 PE=4 SV=1
TRINITY_DN2143_c1_g1_i3	990	29.42	0	1.04	0	0.72	0	-7.76426	-
TRINITY_DN21663_c0_g1_i2	1309	29.12	0	0.74	0	0.51	0	-7.76426	tr|A0A0J8BA71|A0A0J8BA71_BETVU Uncharacterized protein OS=Beta vulgaris subsp. vulgaris OX=3555 GN=BVRB_4g094540 PE=4 SV=1
TRINITY_DN2299_c1_g1_i1	395	28.76	0	3.88	0	2.68	0	-7.76426	-
TRINITY_DN2306_c0_g1_i3	3072	29.08	0.02	0.29	0	0.2	0	-7.76426	tr|A0A0K9R2D9|A0A0K9R2D9_SPIOL Uncharacterized protein OS=Spinacia oleracea OX=3562 GN=SOVF_114570 PE=3 SV=1
TRINITY_DN2500_c0_g1_i10	1376	29.24	0	0.7	0	0.48	0	-7.76426	tr|A0A0K9S096|A0A0K9S096_SPIOL Uncharacterized protein OS=Spinacia oleracea OX=3562 GN=SOVF_014560 PE=3 SV=1
TRINITY_DN2842_c0_g1_i5	2417	29.34	0.17	0.38	0	0.26	0	-7.76426	tr|A0A0J8CB59|A0A0J8CB59_BETVU Uncharacterized protein OS=Beta vulgaris subsp. vulgaris OX=3555 GN=BVRB_5g113530 PE=4 SV=1
TRINITY_DN3081_c0_g1_i5	4004	28.96	0	0.22	0	0.15	0	-7.76426	tr|A0A0K9R211|A0A0K9R211_SPIOL Uncharacterized protein OS=Spinacia oleracea OX=3562 GN=SOVF_115780 PE=4 SV=1
TRINITY_DN3176_c0_g2_i5	1872	29.19	0	0.49	0	0.34	0	-7.76426	tr|A0A0K9RZE7|A0A0K9RZE7_SPIOL Uncharacterized protein OS=Spinacia oleracea OX=3562 GN=SOVF_011520 PE=3 SV=1
TRINITY_DN3398_c0_g2_i3	1565	29.37	0	0.61	0	0.42	0	-7.76426	tr|A0A0K9QIE5|A0A0K9QIE5_SPIOL Uncharacterized protein OS=Spinacia oleracea OX=3562 GN=SOVF_175780 PE=4 SV=1
TRINITY_DN3629_c0_g1_i8	4772	29.11	0	0.18	0	0.13	0	-7.76426	tr|A0A0K9RG99|A0A0K9RG99_SPIOL Uncharacterized protein OS=Spinacia oleracea OX=3562 GN=SOVF_069900 PE=4 SV=1
TRINITY_DN3633_c0_g1_i3	4478	29.14	0	0.19	0	0.13	0	-7.76426	tr|A0A0K9RP26|A0A0K9RP26_SPIOL RING-type E3 ubiquitin transferase OS=Spinacia oleracea OX=3562 GN=SOVF_045050 PE=4 SV=1
TRINITY_DN3891_c0_g1_i4	3355	29.05	0	0.26	0	0.18	0	-7.76426	tr|A0A0K9RQR6|A0A0K9RQR6_SPIOL Uncharacterized protein OS=Spinacia oleracea OX=3562 GN=SOVF_045100 PE=4 SV=1
TRINITY_DN3990_c0_g1_i3	1755	29.32	0	0.53	0	0.37	0	-7.76426	tr|A0A0K9RXW9|A0A0K9RXW9_SPIOL Uncharacterized protein OS=Spinacia oleracea OX=3562 GN=SOVF_017090 PE=4 SV=1
TRINITY_DN5295_c0_g1_i2	3158	28.76	0	0.28	0	0.19	0	-7.76426	tr|A0A0J8B465|A0A0J8B465_BETVU Uncharacterized protein OS=Beta vulgaris subsp. vulgaris OX=3555 GN=BVRB_016700 PE=4 SV=1
TRINITY_DN52_c2_g2_i1	571	29	0	2.14	0	1.48	0	-7.76426	-
TRINITY_DN5303_c0_g1_i5	828	28.81	0	1.28	0	0.88	0	-7.76426	-
TRINITY_DN5724_c0_g1_i5	5078	28.55	0.02	0.17	0	0.11	0	-7.76426	tr|A0A0K9RNE9|A0A0K9RNE9_SPIOL Uncharacterized protein OS=Spinacia oleracea OX=3562 GN=SOVF_046860 PE=4 SV=1
TRINITY_DN6317_c0_g3_i2	699	29	0	1.61	0	1.11	0	-7.76426	-
TRINITY_DN7694_c0_g1_i4	1890	28.6	0	0.48	0	0.33	0	-7.76426	-
TRINITY_DN7958_c0_g1_i8	511	28.82	0	2.52	0	1.74	0	-7.76426	-
TRINITY_DN7973_c0_g2_i1	2606	28.98	0	0.34	0	0.24	0	-7.76426	tr|A0A0K9R1I4|A0A0K9R1I4_SPIOL Mitogen-activated protein kinase OS=Spinacia oleracea OX=3562 GN=SOVF_117550 PE=3 SV=1
TRINITY_DN8083_c0_g1_i12	1974	28.79	0	0.46	0	0.32	0	-7.76426	-
TRINITY_DN8341_c0_g1_i8	440	28.88	0	3.22	0	2.22	0	-7.76426	tr|A0A0K9QKR5|A0A0K9QKR5_SPIOL Uncharacterized protein OS=Spinacia oleracea OX=3562 GN=SOVF_168200 PE=4 SV=1
TRINITY_DN8343_c1_g1_i2	2273	28.51	0	0.39	0	0.27	0	-7.76426	tr|A0A0K9RWA7|A0A0K9RWA7_SPIOL Uncharacterized protein OS=Spinacia oleracea OX=3562 GN=SOVF_021640 PE=4 SV=1
TRINITY_DN8348_c1_g1_i5	3009	28.68	0	0.29	0	0.2	0	-7.76426	tr|A0A0K9RE94|A0A0K9RE94_SPIOL Uncharacterized protein OS=Spinacia oleracea OX=3562 GN=SOVF_082780 PE=4 SV=1
TRINITY_DN8443_c0_g2_i3	886	29.41	0	1.2	0	0.83	0	-7.76426	-
TRINITY_DN8963_c1_g2_i4	2698	29.36	0	0.33	0	0.23	0	-7.76426	-
TRINITY_DN9777_c0_g2_i1	2572	28.97	0	0.35	0	0.24	0	-7.76426	tr|A0A0K9S0Z9|A0A0K9S0Z9_SPIOL Uncharacterized protein OS=Spinacia oleracea OX=3562 GN=SOVF_005410 PE=4 SV=1
TRINITY_DN9942_c0_g2_i5	3333	28.9	0	0.26	0	0.18	0	-7.76426	tr|A0A0K9RY69|A0A0K9RY69_SPIOL Uncharacterized protein OS=Spinacia oleracea OX=3562 GN=SOVF_021970 PE=4 SV=1
TRINITY_DN10313_c0_g1_i2	1969	28.38	0	0.45	0	0.31	0	-7.71387	tr|A0A0K9QCQ0|A0A0K9QCQ0_SPIOL Uncharacterized protein OS=Spinacia oleracea OX=3562 GN=SOVF_194120 PE=4 SV=1
TRINITY_DN1052_c0_g1_i4	2450	28.01	0	0.35	0	0.24	0	-7.71387	tr|A0A0K9RTQ9|A0A0K9RTQ9_SPIOL Uncharacterized protein OS=Spinacia oleracea OX=3562 GN=SOVF_029420 PE=4 SV=1
TRINITY_DN11312_c0_g2_i7	1417	28.1	0	0.65	0	0.45	0	-7.71387	tr|A0A0K9RD86|A0A0K9RD86_SPIOL Uncharacterized protein OS=Spinacia oleracea OX=3562 GN=SOVF_079430 PE=4 SV=1
TRINITY_DN11840_c0_g1_i1	558	27.82	0	2.13	0	1.47	0	-7.71387	tr|A0A0K9RAV4|A0A0K9RAV4_SPIOL Uncharacterized protein OS=Spinacia oleracea OX=3562 GN=SOVF_093910 PE=4 SV=1
TRINITY_DN11861_c1_g1_i1	221	28	0	15.43	0	10.64	0	-7.71387	-
TRINITY_DN12129_c0_g3_i5	1822	27.93	0	0.49	0	0.34	0	-7.71387	tr|A0A0K9R1V3|A0A0K9R1V3_SPIOL Uncharacterized protein OS=Spinacia oleracea OX=3562 GN=SOVF_116560 PE=4 SV=1
TRINITY_DN1595_c0_g1_i3	1108	27.74	0	0.86	0	0.59	0	-7.71387	tr|A0A0K9QUX1|A0A0K9QUX1_SPIOL Uncharacterized protein OS=Spinacia oleracea OX=3562 GN=SOVF_138600 PE=4 SV=1
TRINITY_DN1697_c2_g1_i6	2782	28.5	0	0.31	0	0.22	0	-7.71387	tr|A0A0K9RUJ9|A0A0K9RUJ9_SPIOL Uncharacterized protein OS=Spinacia oleracea OX=3562 GN=SOVF_033570 PE=3 SV=1
TRINITY_DN17135_c0_g1_i5	1311	28.31	0	0.72	0	0.49	0	-7.71387	-
TRINITY_DN1841_c3_g1_i16	1587	27.99	0	0.57	0	0.39	0	-7.71387	tr|A0A0K9RG73|A0A0K9RG73_SPIOL Uncharacterized protein OS=Spinacia oleracea OX=3562 GN=SOVF_070300 PE=4 SV=1
TRINITY_DN1904_c0_g1_i12	4748	28.13	0	0.18	0	0.12	0	-7.71387	tr|A0A0J8CKJ8|A0A0J8CKJ8_BETVU Uncharacterized protein OS=Beta vulgaris subsp. vulgaris OX=3555 GN=BVRB_4g076260 PE=4 SV=1
TRINITY_DN2050_c0_g1_i4	1094	27.53	0	0.86	0	0.6	0	-7.71387	tr|A0A0K9RPR4|A0A0K9RPR4_SPIOL Uncharacterized protein OS=Spinacia oleracea OX=3562 GN=SOVF_041890 PE=4 SV=1
TRINITY_DN2215_c0_g1_i3	1557	28.19	0	0.59	0	0.4	0	-7.71387	tr|A0A0K9R2S3|A0A0K9R2S3_SPIOL Uncharacterized protein OS=Spinacia oleracea OX=3562 GN=SOVF_118300 PE=3 SV=1
TRINITY_DN2262_c0_g1_i18	863	27.84	0	1.17	0	0.81	0	-7.71387	-
TRINITY_DN2724_c1_g2_i15	547	27.89	0	2.2	0	1.51	0	-7.71387	tr|A0A0K9QV63|A0A0K9QV63_SPIOL Uncharacterized protein OS=Spinacia oleracea OX=3562 GN=SOVF_137620 PE=4 SV=1
TRINITY_DN28071_c0_g2_i1	2108	28	0	0.42	0	0.29	0	-7.71387	-
TRINITY_DN2926_c0_g1_i1	535	27.9	0	2.27	0	1.57	0	-7.71387	-
TRINITY_DN3064_c0_g1_i8	2218	27.52	0	0.39	0	0.27	0	-7.71387	tr|A0A0K9REE9|A0A0K9REE9_SPIOL Isocitrate dehydrogenase [NADP] OS=Spinacia oleracea OX=3562 GN=SOVF_076620 PE=3 SV=1
TRINITY_DN4777_c0_g1_i8	3135	27.86	0	0.27	0	0.19	0	-7.71387	tr|A0A0K9S2U4|A0A0K9S2U4_SPIOL Uncharacterized protein OS=Spinacia oleracea OX=3562 GN=SOVF_001090 PE=4 SV=1
TRINITY_DN5138_c0_g1_i21	1351	28.37	0	0.69	0	0.48	0	-7.71387	tr|A0A0K9RNP1|A0A0K9RNP1_SPIOL Uncharacterized protein OS=Spinacia oleracea OX=3562 GN=SOVF_051490 PE=3 SV=1
TRINITY_DN575_c0_g2_i1	2957	27.98	0	0.29	0	0.2	0	-7.71387	tr|A0A0K9QES6|A0A0K9QES6_SPIOL Uncharacterized protein OS=Spinacia oleracea OX=3562 GN=SOVF_187180 PE=4 SV=1
TRINITY_DN5921_c0_g1_i1	2841	27.75	0.04	0.3	0	0.21	0	-7.71387	tr|A0A0K9RXS8|A0A0K9RXS8_SPIOL Uncharacterized protein OS=Spinacia oleracea OX=3562 GN=SOVF_022590 PE=4 SV=1
TRINITY_DN5977_c0_g1_i1	1567	28.13	0	0.58	0	0.4	0	-7.71387	tr|A0A0K9R5V2|A0A0K9R5V2_SPIOL Uncharacterized protein OS=Spinacia oleracea OX=3562 GN=SOVF_103210 PE=4 SV=1
TRINITY_DN6245_c0_g1_i8	2783	28.43	0	0.31	0	0.22	0	-7.71387	tr|A0A0K9R0R3|A0A0K9R0R3_SPIOL Uncharacterized protein OS=Spinacia oleracea OX=3562 GN=SOVF_126260 PE=4 SV=1
TRINITY_DN6303_c1_g1_i13	1996	28.44	0	0.45	0	0.31	0	-7.71387	tr|A0A0K9RCV1|A0A0K9RCV1_SPIOL Protein yippee-like OS=Spinacia oleracea OX=3562 GN=SOVF_081200 PE=3 SV=1
TRINITY_DN6478_c0_g1_i1	1155	27.54	0	0.81	0	0.56	0	-7.71387	tr|A0A0K9RMV8|A0A0K9RMV8_SPIOL Thymidine kinase OS=Spinacia oleracea OX=3562 GN=SOVF_054150 PE=3 SV=1
TRINITY_DN6568_c0_g3_i2	1106	28	0	0.87	0	0.6	0	-7.71387	-
TRINITY_DN6639_c0_g1_i5	3175	28.5	0	0.27	0	0.19	0	-7.71387	tr|A0A0K9QJM3|A0A0K9QJM3_SPIOL NADPH-protochlorophyllide oxidoreductase OS=Spinacia oleracea OX=3562 GN=SOVF_171730 PE=3 SV=1
TRINITY_DN7247_c0_g1_i4	1220	28.06	0	0.77	0	0.53	0	-7.71387	tr|A0A0K9QEI5|A0A0K9QEI5_SPIOL Uncharacterized protein OS=Spinacia oleracea OX=3562 GN=SOVF_194800 PE=4 SV=1
TRINITY_DN7965_c0_g1_i9	2263	28.04	0	0.39	0	0.27	0	-7.71387	tr|A0A0K9R8V5|A0A0K9R8V5_SPIOL Uncharacterized protein OS=Spinacia oleracea OX=3562 GN=SOVF_093830 PE=4 SV=1
TRINITY_DN8540_c0_g1_i3	765	28.4	0	1.4	0	0.96	0	-7.71387	tr|A0A0K9Q7V5|A0A0K9Q7V5_SPIOL Uncharacterized protein (Fragment) OS=Spinacia oleracea OX=3562 GN=SOVF_215370 PE=4 SV=1
TRINITY_DN8699_c0_g1_i4	2353	27.91	0	0.37	0	0.25	0	-7.71387	tr|A0A0K9RE51|A0A0K9RE51_SPIOL Uncharacterized protein OS=Spinacia oleracea OX=3562 GN=SOVF_076830 PE=4 SV=1
TRINITY_DN1167_c0_g1_i1	1333	26.88	0	0.67	0	0.46	0	-7.66166	-
TRINITY_DN11947_c0_g1_i2	3259	27.27	0	0.25	0	0.17	0	-7.66166	tr|A0A0K9QZF9|A0A0K9QZF9_SPIOL Uncharacterized protein OS=Spinacia oleracea OX=3562 GN=SOVF_124240 PE=4 SV=1
TRINITY_DN13035_c0_g1_i24	2443	26.94	0	0.34	0	0.23	0	-7.66166	tr|A0A0K9QKE2|A0A0K9QKE2_SPIOL Uncharacterized protein OS=Spinacia oleracea OX=3562 GN=SOVF_169370 PE=3 SV=1
TRINITY_DN13276_c0_g2_i5	1757	27.01	0	0.49	0	0.34	0	-7.66166	tr|A0A0K9QUV2|A0A0K9QUV2_SPIOL Uncharacterized protein OS=Spinacia oleracea OX=3562 GN=SOVF_138960 PE=3 SV=1
TRINITY_DN13656_c0_g1_i9	1395	26.54	0	0.63	0	0.43	0	-7.66166	tr|A0A0K9QWV7|A0A0K9QWV7_SPIOL Uncharacterized protein OS=Spinacia oleracea OX=3562 GN=SOVF_132110 PE=4 SV=1
TRINITY_DN13952_c2_g1_i1	1016	26.73	0	0.92	0	0.63	0	-7.66166	tr|E7BQD4|E7BQD4_SILLA Gag-pol polyprotein OS=Silene latifolia OX=37657 PE=4 SV=1
TRINITY_DN14061_c0_g1_i1	2913	27.17	0	0.28	0	0.2	0	-7.66166	tr|A0A0K9S2Z6|A0A0K9S2Z6_SPIOL Uncharacterized protein OS=Spinacia oleracea OX=3562 GN=SOVF_000710 PE=4 SV=1
TRINITY_DN14911_c0_g1_i4	276	26.91	0	7.83	0	5.4	0	-7.66166	tr|A0A0K9QQM2|A0A0K9QQM2_SPIOL Uncharacterized protein (Fragment) OS=Spinacia oleracea OX=3562 GN=SOVF_152480 PE=4 SV=1
TRINITY_DN1561_c0_g1_i2	3115	26.65	0	0.26	0	0.18	0	-7.66166	tr|A0A0K9RMU0|A0A0K9RMU0_SPIOL Uncharacterized protein OS=Spinacia oleracea OX=3562 GN=SOVF_054440 PE=4 SV=1
TRINITY_DN1596_c0_g1_i16	2990	26.56	0	0.27	0	0.19	0	-7.66166	tr|A0A0K9QUV6|A0A0K9QUV6_SPIOL Uncharacterized protein OS=Spinacia oleracea OX=3562 GN=SOVF_138550 PE=4 SV=1
TRINITY_DN1675_c0_g1_i18	2423	27.31	0	0.35	0	0.24	0	-7.66166	tr|A0A0K9RU91|A0A0K9RU91_SPIOL Uncharacterized protein OS=Spinacia oleracea OX=3562 GN=SOVF_028500 PE=4 SV=1
TRINITY_DN1699_c0_g2_i1	2838	26.71	0	0.29	0	0.2	0	-7.66166	tr|A0A0J8C066|A0A0J8C066_BETVU Signal recognition particle subunit SRP68 OS=Beta vulgaris subsp. vulgaris OX=3555 GN=BVRB_7g168050 PE=3 SV=1
TRINITY_DN2305_c2_g1_i3	3357	27.06	0.17	0.24	0	0.17	0	-7.66166	tr|A0A0K9S2I1|A0A0K9S2I1_SPIOL Carboxypeptidase OS=Spinacia oleracea OX=3562 GN=SOVF_007550 PE=3 SV=1
TRINITY_DN2617_c0_g2_i5	2989	27.19	0	0.28	0	0.19	0	-7.66166	tr|A0A0K9RPH5|A0A0K9RPH5_SPIOL Uncharacterized protein (Fragment) OS=Spinacia oleracea OX=3562 GN=SOVF_043090 PE=4 SV=1
TRINITY_DN3261_c4_g1_i1	258	26.56	0	9.23	0	6.36	0	-7.66166	-
TRINITY_DN3642_c0_g1_i2	2468	26.96	0	0.34	0	0.23	0	-7.66166	tr|A0A0K9RIP9|A0A0K9RIP9_SPIOL Uncharacterized protein OS=Spinacia oleracea OX=3562 GN=SOVF_066490 PE=4 SV=1
TRINITY_DN3864_c0_g1_i3	2697	27.34	0	0.31	0	0.21	0	-7.66166	tr|A0A0K9R0U6|A0A0K9R0U6_SPIOL Uncharacterized protein OS=Spinacia oleracea OX=3562 GN=SOVF_119130 PE=4 SV=1
TRINITY_DN459_c0_g1_i6	1235	26.69	0	0.73	0	0.5	0	-7.66166	tr|A0A0K9QG62|A0A0K9QG62_SPIOL Uncharacterized protein OS=Spinacia oleracea OX=3562 GN=SOVF_188400 PE=3 SV=1
TRINITY_DN4668_c0_g1_i3	1033	27.27	0	0.92	0	0.63	0	-7.66166	tr|A0A0K9RNN6|A0A0K9RNN6_SPIOL Uncharacterized protein OS=Spinacia oleracea OX=3562 GN=SOVF_051630 PE=3 SV=1
TRINITY_DN5206_c0_g1_i5	752	27.34	0	1.38	0	0.95	0	-7.66166	-
TRINITY_DN5383_c0_g2_i2	553	27.17	0	2.1	0	1.45	0	-7.66166	-
TRINITY_DN5412_c0_g1_i7	919	26.51	0	1.03	0	0.71	0	-7.66166	-
TRINITY_DN5478_c0_g1_i7	2415	26.98	0	0.35	0	0.24	0	-7.66166	tr|A0A0K9REF3|A0A0K9REF3_SPIOL Uncharacterized protein OS=Spinacia oleracea OX=3562 GN=SOVF_081740 PE=4 SV=1
TRINITY_DN557_c0_g1_i1	1799	27.06	0	0.48	0	0.33	0	-7.66166	tr|A0A0K9S0E6|A0A0K9S0E6_SPIOL Uncharacterized protein OS=Spinacia oleracea OX=3562 GN=SOVF_008470 PE=4 SV=1
TRINITY_DN6342_c0_g1_i2	1296	26.74	0	0.69	0	0.47	0	-7.66166	tr|A0A0K9RC89|A0A0K9RC89_SPIOL Uncharacterized protein OS=Spinacia oleracea OX=3562 GN=SOVF_088610 PE=4 SV=1
TRINITY_DN641_c1_g3_i6	1756	26.92	0.04	0.49	0	0.34	0	-7.66166	tr|A0A0J8BLW3|A0A0J8BLW3_BETVU Uncharacterized protein OS=Beta vulgaris subsp. vulgaris OX=3555 GN=BVRB_9g207080 PE=4 SV=1
TRINITY_DN6471_c1_g1_i1	1991	27.27	0	0.43	0	0.3	0	-7.66166	tr|A0A0K9QEE2|A0A0K9QEE2_SPIOL Uncharacterized protein (Fragment) OS=Spinacia oleracea OX=3562 GN=SOVF_188530 PE=4 SV=1
TRINITY_DN6500_c0_g1_i12	3079	26.77	0	0.26	0	0.18	0	-7.66166	tr|A0A0K9S014|A0A0K9S014_SPIOL Uncharacterized protein OS=Spinacia oleracea OX=3562 GN=SOVF_015210 PE=4 SV=1
TRINITY_DN6575_c1_g1_i1	488	27.41	0	2.58	0	1.78	0	-7.66166	-
TRINITY_DN7065_c0_g1_i24	5635	27.04	0	0.14	0	0.1	0	-7.66166	tr|A0A0K9QWM4|A0A0K9QWM4_SPIOL Uncharacterized protein OS=Spinacia oleracea OX=3562 GN=SOVF_133110 PE=4 SV=1
TRINITY_DN7301_c0_g1_i3	554	27.18	0	2.1	0	1.45	0	-7.66166	-
TRINITY_DN764_c0_g1_i5	2057	26.81	0	0.41	0	0.28	0	-7.66166	tr|A0A0A7DLL0|A0A0A7DLL0_BASSC GOX OS=Bassia scoparia OX=83154 PE=2 SV=1
TRINITY_DN7655_c0_g1_i7	2418	27.34	0	0.35	0	0.24	0	-7.66166	tr|A0A0K9R1P5|A0A0K9R1P5_SPIOL Uncharacterized protein (Fragment) OS=Spinacia oleracea OX=3562 GN=SOVF_117030 PE=4 SV=1
TRINITY_DN773_c0_g1_i6	2602	26.83	0	0.32	0	0.22	0	-7.66166	tr|A0A0K9QCM6|A0A0K9QCM6_SPIOL Uncharacterized protein OS=Spinacia oleracea OX=3562 GN=SOVF_194110 PE=4 SV=1
TRINITY_DN9665_c1_g1_i6	3053	27.17	0	0.27	0	0.19	0	-7.66166	tr|A0A0K9R3L5|A0A0K9R3L5_SPIOL Uncharacterized protein OS=Spinacia oleracea OX=3562 GN=SOVF_110930 PE=4 SV=1
TRINITY_DN4452_c0_g2_i1	2127	259.77	1	3.82	0.02	2.63	0.01	-7.65653	tr|L7ZC15|L7ZC15_SPIOL Non-symbiotic hemoglobin OS=Spinacia oleracea OX=3562 PE=2 SV=1
TRINITY_DN194_c0_g1_i5	6607	255.5	1.12	1.14	0.01	0.78	0	-7.63417	tr|A0A0K9RE17|A0A0K9RE17_SPIOL Phospholipid-transporting ATPase OS=Spinacia oleracea OX=3562 GN=SOVF_076110 PE=3 SV=1
TRINITY_DN10279_c0_g1_i8	5698	25.61	0	0.13	0	0.09	0	-7.60748	tr|A0A0K9R1D1|A0A0K9R1D1_SPIOL Uncharacterized protein OS=Spinacia oleracea OX=3562 GN=SOVF_115940 PE=4 SV=1
TRINITY_DN10403_c0_g1_i2	1274	25.53	0	0.67	0	0.46	0	-7.60748	tr|A0A0K9S0U2|A0A0K9S0U2_SPIOL Uncharacterized protein OS=Spinacia oleracea OX=3562 GN=SOVF_013280 PE=4 SV=1
TRINITY_DN12043_c0_g1_i1	1025	26.36	0	0.9	0	0.62	0	-7.60748	-
TRINITY_DN12166_c0_g1_i3	795	26	0	1.22	0	0.84	0	-7.60748	tr|E7BQD4|E7BQD4_SILLA Gag-pol polyprotein OS=Silene latifolia OX=37657 PE=4 SV=1
TRINITY_DN12449_c0_g1_i1	1021	25.69	0	0.88	0	0.6	0	-7.60748	tr|A0A0K9RDB6|A0A0K9RDB6_SPIOL Malic enzyme OS=Spinacia oleracea OX=3562 GN=SOVF_078700 PE=3 SV=1
TRINITY_DN12566_c1_g1_i7	718	26.09	0	1.4	0	0.96	0	-7.60748	-
TRINITY_DN14098_c0_g1_i1	411	25.98	0	3.26	0	2.25	0	-7.60748	tr|A0A0K9RBI0|A0A0K9RBI0_SPIOL Uncharacterized protein OS=Spinacia oleracea OX=3562 GN=SOVF_089720 PE=4 SV=1
TRINITY_DN15217_c0_g1_i6	1637	26.21	0	0.52	0	0.36	0	-7.60748	tr|A0A0K9RYW9|A0A0K9RYW9_SPIOL Signal recognition particle 9 kDa protein OS=Spinacia oleracea OX=3562 GN=SOVF_018280 PE=3 SV=1
TRINITY_DN15627_c0_g1_i1	1088	26.1	0	0.83	0	0.57	0	-7.60748	tr|A0A0K9QZ13|A0A0K9QZ13_SPIOL Uncharacterized protein OS=Spinacia oleracea OX=3562 GN=SOVF_124640 PE=4 SV=1
TRINITY_DN161_c0_g1_i10	4161	26.36	0	0.19	0	0.13	0	-7.60748	tr|A0A0K9RCT4|A0A0K9RCT4_SPIOL Uncharacterized protein OS=Spinacia oleracea OX=3562 GN=SOVF_081340 PE=4 SV=1
TRINITY_DN1641_c1_g1_i1	727	25.73	0	1.35	0	0.93	0	-7.60748	tr|A0A0K9R2H6|A0A0K9R2H6_SPIOL Uncharacterized protein OS=Spinacia oleracea OX=3562 GN=SOVF_120380 PE=4 SV=1
TRINITY_DN17056_c1_g1_i4	451	26.22	0	2.8	0	1.93	0	-7.60748	-
TRINITY_DN1852_c0_g1_i2	605	26.02	0	1.77	0	1.22	0	-7.60748	-
TRINITY_DN2021_c0_g1_i11	1435	25.82	0	0.59	0	0.41	0	-7.60748	tr|A0A0J8BDC6|A0A0J8BDC6_BETVU Uncharacterized protein OS=Beta vulgaris subsp. vulgaris OX=3555 GN=BVRB_4g096100 PE=4 SV=1
TRINITY_DN21522_c0_g1_i1	1993	26	0	0.41	0	0.28	0	-7.60748	tr|Q1H8R8|Q1H8R8_OXYRB Putative coatomer protein, epsilon subunit (Fragment) OS=Oxybasis rubra OX=3560 GN=cope PE=2 SV=1
TRINITY_DN23051_c1_g1_i1	596	26.34	0	1.83	0	1.26	0	-7.60748	tr|A0A0K9QWC7|A0A0K9QWC7_SPIOL Uncharacterized protein OS=Spinacia oleracea OX=3562 GN=SOVF_139130 PE=4 SV=1
TRINITY_DN2379_c0_g2_i6	1228	26.22	0	0.72	0	0.49	0	-7.60748	tr|A0A0K9RJT6|A0A0K9RJT6_SPIOL Uncharacterized protein OS=Spinacia oleracea OX=3562 GN=SOVF_063950 PE=4 SV=1
TRINITY_DN25304_c0_g1_i11	1022	25.64	0	0.87	0	0.6	0	-7.60748	tr|A0A0K9RE60|A0A0K9RE60_SPIOL Uncharacterized protein OS=Spinacia oleracea OX=3562 GN=SOVF_076180 PE=4 SV=1
TRINITY_DN254_c0_g2_i12	2121	25.78	0	0.38	0	0.26	0	-7.60748	tr|A0A0K9R3W5|A0A0K9R3W5_SPIOL Uncharacterized protein OS=Spinacia oleracea OX=3562 GN=SOVF_109690 PE=4 SV=1
TRINITY_DN28062_c0_g1_i1	668	26	0	1.53	0	1.06	0	-7.60748	tr|A0A0K9REX8|A0A0K9REX8_SPIOL Uncharacterized protein OS=Spinacia oleracea OX=3562 GN=SOVF_074460 PE=4 SV=1
TRINITY_DN2853_c0_g1_i5	2500	25.5	0	0.31	0	0.22	0	-7.60748	tr|A0A0K9Q7L3|A0A0K9Q7L3_SPIOL Uncharacterized protein OS=Spinacia oleracea OX=3562 GN=SOVF_211140 PE=4 SV=1
TRINITY_DN2861_c0_g1_i19	5376	25.68	0	0.14	0	0.1	0	-7.60748	tr|A0A0K9QIT3|A0A0K9QIT3_SPIOL Arp2/3 complex 34 kDa subunit OS=Spinacia oleracea OX=3562 GN=SOVF_174240 PE=3 SV=1
TRINITY_DN29115_c0_g1_i2	1650	26.42	0.04	0.51	0	0.36	0	-7.60748	tr|A0A0K9QYE5|A0A0K9QYE5_SPIOL Uncharacterized protein OS=Spinacia oleracea OX=3562 GN=SOVF_127370 PE=4 SV=1
TRINITY_DN3172_c0_g2_i1	2000	26.1	0	0.41	0	0.28	0	-7.60748	tr|A0A0K9R340|A0A0K9R340_SPIOL Uncharacterized protein OS=Spinacia oleracea OX=3562 GN=SOVF_112090 PE=4 SV=1
TRINITY_DN323_c2_g2_i1	1696	25.58	0	0.48	0	0.33	0	-7.60748	tr|A0A0K9Q9C2|A0A0K9Q9C2_SPIOL Uncharacterized protein OS=Spinacia oleracea OX=3562 GN=SOVF_204920 PE=4 SV=1
TRINITY_DN3367_c0_g2_i16	4616	25.83	0	0.17	0	0.11	0	-7.60748	tr|A0A0K9RM47|A0A0K9RM47_SPIOL Uncharacterized protein OS=Spinacia oleracea OX=3562 GN=SOVF_056950 PE=3 SV=1
TRINITY_DN3433_c0_g1_i7	1189	26.43	0.13	0.75	0	0.52	0	-7.60748	tr|A0A0K9RPP1|A0A0K9RPP1_SPIOL Uncharacterized protein OS=Spinacia oleracea OX=3562 GN=SOVF_043180 PE=4 SV=1
TRINITY_DN3886_c0_g3_i2	1910	25.7	0	0.43	0	0.29	0	-7.60748	tr|A0A0K9RPN5|A0A0K9RPN5_SPIOL Uncharacterized protein OS=Spinacia oleracea OX=3562 GN=SOVF_048950 PE=4 SV=1
TRINITY_DN3978_c0_g1_i19	1304	25.58	0	0.65	0	0.45	0	-7.60748	tr|A0A0K9QG98|A0A0K9QG98_SPIOL Uncharacterized protein OS=Spinacia oleracea OX=3562 GN=SOVF_182500 PE=3 SV=1
TRINITY_DN43177_c0_g1_i1	1415	26	0	0.6	0	0.42	0	-7.60748	-
TRINITY_DN4380_c0_g1_i4	485	25.53	0	2.42	0	1.67	0	-7.60748	-
TRINITY_DN496_c1_g1_i19	3549	26.45	0	0.22	0	0.15	0	-7.60748	tr|A0A0K9RQS5|A0A0K9RQS5_SPIOL Uncharacterized protein OS=Spinacia oleracea OX=3562 GN=SOVF_045700 PE=4 SV=1
TRINITY_DN5336_c0_g2_i3	1002	25.88	0	0.9	0	0.62	0	-7.60748	tr|A0A0K9RIE6|A0A0K9RIE6_SPIOL Uncharacterized protein OS=Spinacia oleracea OX=3562 GN=SOVF_063190 PE=3 SV=1
TRINITY_DN5422_c0_g1_i16	628	25.66	0	1.65	0	1.14	0	-7.60748	tr|A0A0J8B8B2|A0A0J8B8B2_BETVU Uncharacterized protein OS=Beta vulgaris subsp. vulgaris OX=3555 GN=BVRB_002810 PE=4 SV=1
TRINITY_DN557_c0_g1_i10	1929	25.59	0	0.42	0	0.29	0	-7.60748	tr|A0A0K9S0E6|A0A0K9S0E6_SPIOL Uncharacterized protein OS=Spinacia oleracea OX=3562 GN=SOVF_008470 PE=4 SV=1
TRINITY_DN6128_c0_g3_i2	582	25.88	0	1.86	0	1.28	0	-7.60748	-
TRINITY_DN6459_c0_g1_i2	892	26.34	0	1.06	0	0.73	0	-7.60748	tr|A0A0K9R5W8|A0A0K9R5W8_SPIOL Uncharacterized protein OS=Spinacia oleracea OX=3562 GN=SOVF_108340 PE=4 SV=1
TRINITY_DN6509_c0_g1_i3	2882	25.62	0	0.27	0	0.19	0	-7.60748	tr|A0A0J8B572|A0A0J8B572_BETVU Uncharacterized protein OS=Beta vulgaris subsp. vulgaris OX=3555 GN=BVRB_013470 PE=4 SV=1
TRINITY_DN6509_c0_g1_i5	3188	26.21	0	0.25	0	0.17	0	-7.60748	tr|A0A0J8B572|A0A0J8B572_BETVU Uncharacterized protein OS=Beta vulgaris subsp. vulgaris OX=3555 GN=BVRB_013470 PE=4 SV=1
TRINITY_DN7262_c0_g1_i9	1626	25.97	0	0.51	0	0.35	0	-7.60748	tr|A0A0K9Q784|A0A0K9Q784_SPIOL Lipase OS=Spinacia oleracea OX=3562 GN=SOVF_213050 PE=3 SV=1
TRINITY_DN785_c1_g1_i2	662	25.91	0	1.55	0	1.07	0	-7.60748	tr|A0A0J8B676|A0A0J8B676_BETVU Uncharacterized protein OS=Beta vulgaris subsp. vulgaris OX=3555 GN=BVRB_009570 PE=4 SV=1
TRINITY_DN7952_c0_g1_i1	2528	26.02	0	0.32	0	0.22	0	-7.60748	tr|A0A0K9RUD5|A0A0K9RUD5_SPIOL Uncharacterized protein OS=Spinacia oleracea OX=3562 GN=SOVF_032900 PE=4 SV=1
TRINITY_DN8339_c0_g1_i3	1879	25.52	0	0.43	0	0.3	0	-7.60748	tr|A0A0K9RKB0|A0A0K9RKB0_SPIOL Uncharacterized protein OS=Spinacia oleracea OX=3562 GN=SOVF_062620 PE=3 SV=1
TRINITY_DN8443_c0_g2_i10	2598	25.6	0	0.3	0	0.21	0	-7.60748	-
TRINITY_DN8596_c0_g1_i10	3223	26.35	0	0.25	0	0.17	0	-7.60748	tr|A0A0J8B8S2|A0A0J8B8S2_BETVU Uncharacterized protein OS=Beta vulgaris subsp. vulgaris OX=3555 GN=BVRB_5g124730 PE=4 SV=1
TRINITY_DN8670_c0_g1_i9	2183	25.73	0	0.37	0	0.25	0	-7.60748	tr|A0A0K9RML7|A0A0K9RML7_SPIOL Uncharacterized protein OS=Spinacia oleracea OX=3562 GN=SOVF_049360 PE=4 SV=1
TRINITY_DN9056_c0_g3_i3	679	25.64	0	1.48	0	1.02	0	-7.60748	-
TRINITY_DN9253_c0_g1_i19	1864	26.17	0	0.45	0	0.31	0	-7.60748	tr|A0A0K9RVR8|A0A0K9RVR8_SPIOL Uncharacterized protein OS=Spinacia oleracea OX=3562 GN=SOVF_021770 PE=4 SV=1
TRINITY_DN9255_c0_g1_i2	451	26	0	2.78	0	1.92	0	-7.60748	tr|A0A0K9QYQ2|A0A0K9QYQ2_SPIOL Uncharacterized protein OS=Spinacia oleracea OX=3562 GN=SOVF_126330 PE=4 SV=1
TRINITY_DN9838_c0_g1_i2	4161	25.69	0	0.18	0	0.13	0	-7.60748	tr|A0A0K9R7F0|A0A0K9R7F0_SPIOL Uncharacterized protein OS=Spinacia oleracea OX=3562 GN=SOVF_098340 PE=4 SV=1
TRINITY_DN9842_c0_g2_i2	312	26.44	0	5.75	0	3.96	0	-7.60748	-
TRINITY_DN9853_c0_g1_i10	1874	25.85	0	0.44	0	0.3	0	-7.60748	tr|A0A0K9RWT5|A0A0K9RWT5_SPIOL Glycosyltransferase OS=Spinacia oleracea OX=3562 GN=SOVF_025340 PE=3 SV=1
TRINITY_DN10090_c0_g1_i1	1490	25.15	0	0.55	0	0.38	0	-7.5512	-
TRINITY_DN1036_c0_g1_i2	2175	24.56	0	0.35	0	0.24	0	-7.5512	tr|A0A0K9QZB6|A0A0K9QZB6_SPIOL Uncharacterized protein OS=Spinacia oleracea OX=3562 GN=SOVF_130740 PE=4 SV=1
TRINITY_DN12566_c1_g1_i1	813	25.4	0	1.15	0	0.8	0	-7.5512	-
TRINITY_DN14443_c0_g1_i3	3042	25.16	0	0.25	0	0.17	0	-7.5512	tr|A0A0K9RKA3|A0A0K9RKA3_SPIOL Uncharacterized protein OS=Spinacia oleracea OX=3562 GN=SOVF_057020 PE=3 SV=1
TRINITY_DN15625_c0_g2_i3	697	24.83	0	1.38	0	0.95	0	-7.5512	-
TRINITY_DN17220_c0_g2_i1	605	25	0	1.7	0	1.17	0	-7.5512	tr|J3SIC4|J3SIC4_BETVU ATP-dependent DNA helicase OS=Beta vulgaris subsp. vulgaris OX=3555 PE=3 SV=1
TRINITY_DN19000_c0_g2_i1	801	24.73	0	1.15	0	0.79	0	-7.5512	tr|A0A0K9QD12|A0A0K9QD12_SPIOL Uncharacterized protein OS=Spinacia oleracea OX=3562 GN=SOVF_193290 PE=4 SV=1
TRINITY_DN20704_c0_g1_i3	571	25.37	0	1.87	0	1.29	0	-7.5512	-
TRINITY_DN21095_c0_g1_i7	233	24.72	0	11.52	0	7.94	0	-7.5512	-
TRINITY_DN243_c0_g1_i5	1983	24.58	0	0.39	0	0.27	0	-7.5512	tr|A0A0K9S135|A0A0K9S135_SPIOL Uncharacterized protein OS=Spinacia oleracea OX=3562 GN=SOVF_005470 PE=4 SV=1
TRINITY_DN24555_c0_g1_i17	2440	25.25	0.25	0.32	0	0.22	0	-7.5512	tr|A0A0K9RIJ0|A0A0K9RIJ0_SPIOL Uncharacterized protein OS=Spinacia oleracea OX=3562 GN=SOVF_062950 PE=3 SV=1
TRINITY_DN284_c0_g1_i9	2161	24.69	0	0.36	0	0.25	0	-7.5512	tr|A0A0K9QLT3|A0A0K9QLT3_SPIOL Uncharacterized protein OS=Spinacia oleracea OX=3562 GN=SOVF_170780 PE=4 SV=1
TRINITY_DN3073_c0_g1_i6	2116	25.13	0	0.37	0	0.26	0	-7.5512	tr|A0A0K9QGM3|A0A0K9QGM3_SPIOL Uncharacterized protein OS=Spinacia oleracea OX=3562 GN=SOVF_181460 PE=4 SV=1
TRINITY_DN326_c0_g1_i6	2990	25.4	0.1	0.26	0	0.18	0	-7.5512	tr|A0A0J8E5X4|A0A0J8E5X4_BETVU Uncharacterized protein OS=Beta vulgaris subsp. vulgaris OX=3555 GN=BVRB_3g070480 PE=4 SV=1
TRINITY_DN3385_c0_g1_i12	3106	24.74	0	0.24	0	0.17	0	-7.5512	tr|A0A0K9RVV1|A0A0K9RVV1_SPIOL Phospholipase D OS=Spinacia oleracea OX=3562 GN=SOVF_023060 PE=3 SV=1
TRINITY_DN3433_c0_g1_i3	1017	24.55	0	0.84	0	0.58	0	-7.5512	tr|A0A0K9RPP1|A0A0K9RPP1_SPIOL Uncharacterized protein OS=Spinacia oleracea OX=3562 GN=SOVF_043180 PE=4 SV=1
TRINITY_DN3509_c0_g1_i1	2182	25.42	0	0.36	0	0.25	0	-7.5512	tr|A0A0K9RVI4|A0A0K9RVI4_SPIOL Uncharacterized protein OS=Spinacia oleracea OX=3562 GN=SOVF_023940 PE=4 SV=1
TRINITY_DN3840_c0_g1_i4	703	25.36	0	1.4	0	0.96	0	-7.5512	tr|A0A1B3TNU5|A0A1B3TNU5_MIRJA RNaseH OS=Mirabilis jalapa OX=3538 PE=4 SV=1
TRINITY_DN4019_c1_g1_i1	2453	25.28	0	0.32	0	0.22	0	-7.5512	tr|A0A0J8BEJ4|A0A0J8BEJ4_BETVU Uncharacterized protein OS=Beta vulgaris subsp. vulgaris OX=3555 GN=BVRB_1g020680 PE=4 SV=1
TRINITY_DN4069_c0_g3_i4	2185	25.14	0.02	0.36	0	0.25	0	-7.5512	tr|A0A0K9R0D4|A0A0K9R0D4_SPIOL Uncharacterized protein OS=Spinacia oleracea OX=3562 GN=SOVF_126200 PE=4 SV=1
TRINITY_DN4285_c0_g1_i3	1584	25.19	0	0.51	0	0.35	0	-7.5512	tr|A0A0K9S0K1|A0A0K9S0K1_SPIOL Uncharacterized protein OS=Spinacia oleracea OX=3562 GN=SOVF_008190 PE=3 SV=1
TRINITY_DN4301_c0_g1_i8	2121	25.49	0	0.38	0	0.26	0	-7.5512	tr|A0A0K9QT29|A0A0K9QT29_SPIOL Uncharacterized protein OS=Spinacia oleracea OX=3562 GN=SOVF_149790 PE=4 SV=1
TRINITY_DN6567_c0_g1_i12	546	24.53	0	1.94	0	1.33	0	-7.5512	-
TRINITY_DN732_c0_g1_i5	1461	24.97	0	0.56	0	0.39	0	-7.5512	tr|A0A0K9QQ35|A0A0K9QQ35_SPIOL Uncharacterized protein OS=Spinacia oleracea OX=3562 GN=SOVF_154070 PE=4 SV=1
TRINITY_DN7583_c0_g1_i2	1600	24.77	0	0.5	0	0.34	0	-7.5512	tr|B5MGN7|B5MGN7_PHYAM Glycosyltransferase OS=Phytolacca americana OX=3527 GN=PaGT2 PE=2 SV=1
TRINITY_DN7786_c0_g1_i3	378	25.16	0	3.69	0	2.54	0	-7.5512	-
TRINITY_DN78_c0_g2_i1	3751	25.29	0	0.2	0	0.14	0	-7.5512	tr|A0A0K9QVU2|A0A0K9QVU2_SPIOL Uncharacterized protein OS=Spinacia oleracea OX=3562 GN=SOVF_142760 PE=4 SV=1
TRINITY_DN7916_c0_g1_i2	1649	25.21	0	0.49	0	0.34	0	-7.5512	tr|A0A0K9RZ15|A0A0K9RZ15_SPIOL Glycerol-3-phosphate dehydrogenase [NAD(+)] OS=Spinacia oleracea OX=3562 GN=SOVF_018420 PE=3 SV=1
TRINITY_DN8085_c0_g1_i1	2050	25.37	0	0.39	0	0.27	0	-7.5512	tr|A0A0K9RBN2|A0A0K9RBN2_SPIOL Uncharacterized protein (Fragment) OS=Spinacia oleracea OX=3562 GN=SOVF_085090 PE=3 SV=1
TRINITY_DN8246_c0_g1_i28	1813	25.4	0	0.45	0	0.31	0	-7.5512	-
TRINITY_DN8752_c0_g2_i8	569	25	0	1.86	0	1.28	0	-7.5512	-
TRINITY_DN9329_c0_g1_i1	1369	24.91	0	0.6	0	0.41	0	-7.5512	tr|A0A0J8D1D3|A0A0J8D1D3_BETVU Uncharacterized protein OS=Beta vulgaris subsp. vulgaris OX=3555 GN=BVRB_2g033090 PE=4 SV=1
TRINITY_DN10384_c0_g2_i10	2958	23.86	0	0.25	0	0.17	0	-7.49262	tr|A0A0K9RDK2|A0A0K9RDK2_SPIOL Uncharacterized protein OS=Spinacia oleracea OX=3562 GN=SOVF_079180 PE=4 SV=1
TRINITY_DN10810_c0_g1_i2	2080	23.52	0	0.35	0	0.24	0	-7.49262	tr|A0A0K9RYL1|A0A0K9RYL1_SPIOL Uncharacterized protein OS=Spinacia oleracea OX=3562 GN=SOVF_014660 PE=4 SV=1
TRINITY_DN11546_c0_g1_i1	3429	23.66	0	0.21	0	0.14	0	-7.49262	tr|A0A0K9Q9I9|A0A0K9Q9I9_SPIOL Uncharacterized protein OS=Spinacia oleracea OX=3562 GN=SOVF_210000 PE=4 SV=1
TRINITY_DN12219_c0_g3_i2	1802	23.5	0	0.41	0	0.29	0	-7.49262	-
TRINITY_DN12276_c0_g2_i3	2585	23.56	0	0.28	0	0.19	0	-7.49262	tr|A0A0K9RQK3|A0A0K9RQK3_SPIOL Uncharacterized protein OS=Spinacia oleracea OX=3562 GN=SOVF_040050 PE=4 SV=1
TRINITY_DN14289_c0_g1_i1	942	24	0	0.9	0	0.62	0	-7.49262	-
TRINITY_DN14852_c0_g1_i3	709	24.45	0	1.33	0	0.92	0	-7.49262	-
TRINITY_DN14916_c0_g1_i4	887	23.6	0	0.96	0	0.66	0	-7.49262	tr|A0A0K9QVL4|A0A0K9QVL4_SPIOL Uncharacterized protein OS=Spinacia oleracea OX=3562 GN=SOVF_143250 PE=4 SV=1
TRINITY_DN1554_c1_g1_i3	891	24.09	0.04	0.97	0	0.67	0	-7.49262	-
TRINITY_DN1596_c0_g1_i29	2934	24.15	0	0.25	0	0.17	0	-7.49262	tr|A0A0K9QUV6|A0A0K9QUV6_SPIOL Uncharacterized protein OS=Spinacia oleracea OX=3562 GN=SOVF_138550 PE=4 SV=1
TRINITY_DN16194_c0_g1_i2	3585	23.92	0	0.2	0	0.14	0	-7.49262	tr|A0A0K9QX55|A0A0K9QX55_SPIOL Uncharacterized protein OS=Spinacia oleracea OX=3562 GN=SOVF_136720 PE=3 SV=1
TRINITY_DN17295_c0_g1_i2	736	24	0	1.24	0	0.86	0	-7.49262	-
TRINITY_DN2503_c0_g1_i11	4267	23.54	0	0.16	0	0.11	0	-7.49262	tr|A0A0K9S1J2|A0A0K9S1J2_SPIOL Uncharacterized protein OS=Spinacia oleracea OX=3562 GN=SOVF_010090 PE=4 SV=1
TRINITY_DN2524_c0_g3_i2	647	24	0	1.48	0	1.02	0	-7.49262	-
TRINITY_DN2697_c0_g1_i6	2992	24.36	0	0.25	0	0.17	0	-7.49262	tr|A0A0K9RID3|A0A0K9RID3_SPIOL Glutathione synthetase OS=Spinacia oleracea OX=3562 GN=SOVF_068250 PE=3 SV=1
TRINITY_DN28071_c0_g1_i6	2117	24.15	0	0.36	0	0.25	0	-7.49262	tr|A0A0K9RY69|A0A0K9RY69_SPIOL Uncharacterized protein OS=Spinacia oleracea OX=3562 GN=SOVF_021970 PE=4 SV=1
TRINITY_DN2821_c0_g1_i1	779	24.26	0	1.16	0	0.8	0	-7.49262	-
TRINITY_DN28519_c0_g4_i2	1737	24.5	0	0.45	0	0.31	0	-7.49262	tr|A0A0K9RRC1|A0A0K9RRC1_SPIOL Glycosyltransferase OS=Spinacia oleracea OX=3562 GN=SOVF_037300 PE=3 SV=1
TRINITY_DN2920_c3_g1_i1	393	24	0	3.27	0	2.25	0	-7.49262	-
TRINITY_DN3418_c0_g1_i9	1053	23.56	0	0.77	0	0.53	0	-7.49262	tr|A0A0K9R9A1|A0A0K9R9A1_SPIOL Uncharacterized protein OS=Spinacia oleracea OX=3562 GN=SOVF_099040 PE=4 SV=1
TRINITY_DN3717_c0_g1_i9	496	23.97	0	2.19	0	1.51	0	-7.49262	-
TRINITY_DN4234_c0_g1_i14	2189	24.34	0.03	0.35	0	0.24	0	-7.49262	tr|A0A0K9R8F0|A0A0K9R8F0_SPIOL Meiotic nuclear division protein 1 homolog OS=Spinacia oleracea OX=3562 GN=SOVF_099820 PE=3 SV=1
TRINITY_DN440_c0_g2_i5	2553	23.53	0	0.28	0	0.2	0	-7.49262	-
TRINITY_DN4479_c0_g1_i1	3170	23.52	0	0.23	0	0.16	0	-7.49262	tr|A0A0K9RDR1|A0A0K9RDR1_SPIOL Uncharacterized protein OS=Spinacia oleracea OX=3562 GN=SOVF_078230 PE=4 SV=1
TRINITY_DN473_c1_g1_i9	2715	24.5	0.34	0.28	0	0.19	0	-7.49262	tr|A0A0K9QT65|A0A0K9QT65_SPIOL Uncharacterized protein OS=Spinacia oleracea OX=3562 GN=SOVF_151050 PE=3 SV=1
TRINITY_DN4822_c1_g1_i7	2125	24	0	0.35	0	0.24	0	-7.49262	tr|A0A0K9RN18|A0A0K9RN18_SPIOL Uncharacterized protein OS=Spinacia oleracea OX=3562 GN=SOVF_048350 PE=4 SV=1
TRINITY_DN5138_c0_g1_i17	1096	24.26	0	0.76	0	0.52	0	-7.49262	tr|A0A0K9RNP1|A0A0K9RNP1_SPIOL Uncharacterized protein OS=Spinacia oleracea OX=3562 GN=SOVF_051490 PE=3 SV=1
TRINITY_DN5551_c1_g1_i2	1363	24.18	0	0.59	0	0.4	0	-7.49262	tr|A0A0K9QSE7|A0A0K9QSE7_SPIOL Uncharacterized protein OS=Spinacia oleracea OX=3562 GN=SOVF_152120 PE=4 SV=1
TRINITY_DN5568_c0_g1_i1	886	24.35	0	0.99	0	0.68	0	-7.49262	tr|A0A0K9RUG0|A0A0K9RUG0_SPIOL Uncharacterized protein OS=Spinacia oleracea OX=3562 GN=SOVF_032390 PE=4 SV=1
TRINITY_DN5718_c0_g1_i5	2124	23.69	0	0.35	0	0.24	0	-7.49262	tr|A0A0K9QJ93|A0A0K9QJ93_SPIOL Uncharacterized protein OS=Spinacia oleracea OX=3562 GN=SOVF_178000 PE=4 SV=1
TRINITY_DN5775_c0_g1_i7	1176	24.48	0	0.71	0	0.49	0	-7.49262	tr|A0A0K9QJ95|A0A0K9QJ95_SPIOL Uncharacterized protein OS=Spinacia oleracea OX=3562 GN=SOVF_179280 PE=4 SV=1
TRINITY_DN5858_c1_g1_i1	3431	24.41	0	0.21	0	0.15	0	-7.49262	tr|A0A0K9RCV3|A0A0K9RCV3_SPIOL Uncharacterized protein OS=Spinacia oleracea OX=3562 GN=SOVF_081040 PE=4 SV=1
TRINITY_DN5982_c0_g1_i6	1018	24.05	0	0.82	0	0.57	0	-7.49262	-
TRINITY_DN6006_c0_g1_i6	1194	23.6	0	0.67	0	0.46	0	-7.49262	-
TRINITY_DN6072_c0_g1_i20	2499	24.42	0	0.3	0	0.21	0	-7.49262	tr|A0A0K9Q8W3|A0A0K9Q8W3_SPIOL Uncharacterized protein OS=Spinacia oleracea OX=3562 GN=SOVF_212140 PE=4 SV=1
TRINITY_DN6072_c0_g1_i21	942	24.32	0	0.92	0	0.63	0	-7.49262	tr|A0A0K9Q8W3|A0A0K9Q8W3_SPIOL Uncharacterized protein OS=Spinacia oleracea OX=3562 GN=SOVF_212140 PE=4 SV=1
TRINITY_DN6317_c0_g2_i1	547	24	0	1.89	0	1.3	0	-7.49262	-
TRINITY_DN6995_c0_g3_i6	566	24	0	1.8	0	1.24	0	-7.49262	-
TRINITY_DN7644_c0_g1_i5	964	24.31	0	0.89	0	0.61	0	-7.49262	tr|A0A0K9QTH3|A0A0K9QTH3_SPIOL Uncharacterized protein OS=Spinacia oleracea OX=3562 GN=SOVF_143360 PE=3 SV=1
TRINITY_DN8207_c0_g1_i2	683	24.05	0	1.38	0	0.95	0	-7.49262	tr|A0A0K9RAD7|A0A0K9RAD7_SPIOL Uncharacterized protein OS=Spinacia oleracea OX=3562 GN=SOVF_088990 PE=4 SV=1
TRINITY_DN8350_c0_g1_i4	531	23.61	0	1.94	0	1.34	0	-7.49262	-
TRINITY_DN8743_c0_g1_i1	414	24	0	2.97	0	2.05	0	-7.49262	-
TRINITY_DN8883_c0_g1_i9	1498	23.7	0.17	0.52	0	0.36	0	-7.49262	-
TRINITY_DN9248_c0_g2_i6	5389	23.81	0	0.13	0	0.09	0	-7.49262	tr|A0A0K9R3W8|A0A0K9R3W8_SPIOL Uncharacterized protein OS=Spinacia oleracea OX=3562 GN=SOVF_112630 PE=4 SV=1
TRINITY_DN944_c0_g1_i7	1381	23.57	0	0.56	0	0.39	0	-7.49262	tr|A0A0J8BB74|A0A0J8BB74_BETVU Uncharacterized protein OS=Beta vulgaris subsp. vulgaris OX=3555 GN=BVRB_7g177640 PE=4 SV=1
TRINITY_DN2437_c0_g1_i7	1518	3238.31	15.59	69.36	0.35	47.83	0.23	-7.44227	tr|Q711N3|Q711N3_BETVU Salt tolerance protein 2 OS=Beta vulgaris OX=161934 GN=sato2 PE=2 SV=1
TRINITY_DN10145_c0_g1_i2	3609	23.41	0.11	0.2	0	0.13	0	-7.43157	tr|F4NCG1|F4NCG1_BETVU Uncharacterized protein OS=Beta vulgaris subsp. vulgaris OX=3555 PE=4 SV=1
TRINITY_DN11729_c0_g3_i3	2195	22.93	0	0.33	0	0.22	0	-7.43157	tr|E7BQD4|E7BQD4_SILLA Gag-pol polyprotein OS=Silene latifolia OX=37657 PE=4 SV=1
TRINITY_DN11891_c0_g1_i2	2982	22.86	0	0.23	0	0.16	0	-7.43157	tr|A0A0K9QZP4|A0A0K9QZP4_SPIOL Uncharacterized protein (Fragment) OS=Spinacia oleracea OX=3562 GN=SOVF_123260 PE=3 SV=1
TRINITY_DN1212_c0_g1_i13	2707	23	0	0.26	0	0.18	0	-7.43157	tr|A0A0K9QZY4|A0A0K9QZY4_SPIOL Uncharacterized protein OS=Spinacia oleracea OX=3562 GN=SOVF_127640 PE=4 SV=1
TRINITY_DN12996_c0_g1_i1	1976	23.1	0	0.37	0	0.25	0	-7.43157	-
TRINITY_DN1360_c0_g1_i1	2387	22.86	0	0.3	0	0.2	0	-7.43157	tr|A0A0K9RJ22|A0A0K9RJ22_SPIOL Uncharacterized protein OS=Spinacia oleracea OX=3562 GN=SOVF_060990 PE=4 SV=1
TRINITY_DN1550_c0_g1_i1	5106	22.62	0	0.13	0	0.09	0	-7.43157	tr|A0A0K9S2P6|A0A0K9S2P6_SPIOL Uncharacterized protein OS=Spinacia oleracea OX=3562 GN=SOVF_000950 PE=4 SV=1
TRINITY_DN15665_c1_g1_i2	1112	23	0	0.71	0	0.49	0	-7.43157	-
TRINITY_DN1714_c0_g1_i12	3667	22.93	0	0.19	0	0.13	0	-7.43157	tr|A0A0K9R5Q0|A0A0K9R5Q0_SPIOL Uncharacterized protein OS=Spinacia oleracea OX=3562 GN=SOVF_110590 PE=4 SV=1
TRINITY_DN20350_c0_g1_i5	1817	23.48	0	0.41	0	0.28	0	-7.43157	-
TRINITY_DN20722_c0_g2_i4	888	23.3	0	0.95	0	0.65	0	-7.43157	-
TRINITY_DN21262_c0_g1_i1	1255	22.82	0	0.61	0	0.42	0	-7.43157	-
TRINITY_DN2150_c0_g1_i17	1311	23.08	0	0.59	0	0.4	0	-7.43157	tr|A0A0K9QGM1|A0A0K9QGM1_SPIOL Uncharacterized protein OS=Spinacia oleracea OX=3562 GN=SOVF_181630 PE=4 SV=1
TRINITY_DN2232_c0_g1_i10	1787	22.94	0	0.41	0	0.28	0	-7.43157	tr|A0A0J8BB91|A0A0J8BB91_BETVU Uncharacterized protein OS=Beta vulgaris subsp. vulgaris OX=3555 GN=BVRB_4g095370 PE=4 SV=1
TRINITY_DN22359_c0_g1_i11	2033	23.22	0	0.36	0	0.25	0	-7.43157	tr|A0A0K9REA5|A0A0K9REA5_SPIOL Uncharacterized protein OS=Spinacia oleracea OX=3562 GN=SOVF_081280 PE=4 SV=1
TRINITY_DN2536_c0_g1_i2	3901	23.22	0	0.18	0	0.12	0	-7.43157	tr|A0A0J8BV83|A0A0J8BV83_BETVU Uncharacterized protein OS=Beta vulgaris subsp. vulgaris OX=3555 GN=BVRB_8g187720 PE=4 SV=1
TRINITY_DN2651_c0_g1_i12	1871	22.97	0	0.39	0	0.27	0	-7.43157	tr|A0A0K9RKD2|A0A0K9RKD2_SPIOL Uncharacterized protein OS=Spinacia oleracea OX=3562 GN=SOVF_062850 PE=4 SV=1
TRINITY_DN2780_c1_g6_i1	331	22.97	0	4.39	0	3.03	0	-7.43157	-
TRINITY_DN3664_c1_g1_i5	547	22.74	0	1.79	0	1.23	0	-7.43157	-
TRINITY_DN3801_c0_g1_i36	1562	23.27	0	0.48	0	0.33	0	-7.43157	tr|A0A0K9R8Q7|A0A0K9R8Q7_SPIOL Uncharacterized protein OS=Spinacia oleracea OX=3562 GN=SOVF_094130 PE=4 SV=1
TRINITY_DN3886_c0_g3_i9	1161	22.83	0	0.67	0	0.46	0	-7.43157	tr|A0A0K9RPN5|A0A0K9RPN5_SPIOL Uncharacterized protein OS=Spinacia oleracea OX=3562 GN=SOVF_048950 PE=4 SV=1
TRINITY_DN3957_c1_g1_i6	1691	22.59	0	0.43	0	0.3	0	-7.43157	tr|A0A0K9QSJ7|A0A0K9QSJ7_SPIOL Uncharacterized protein OS=Spinacia oleracea OX=3562 GN=SOVF_146580 PE=4 SV=1
TRINITY_DN3993_c0_g1_i2	933	23.35	0	0.89	0	0.61	0	-7.43157	tr|A0A0K9RC04|A0A0K9RC04_SPIOL Uncharacterized protein OS=Spinacia oleracea OX=3562 GN=SOVF_090050 PE=4 SV=1
TRINITY_DN4101_c0_g1_i5	3056	23.01	0	0.23	0	0.16	0	-7.43157	tr|A0A0K9R317|A0A0K9R317_SPIOL Uncharacterized protein OS=Spinacia oleracea OX=3562 GN=SOVF_111960 PE=4 SV=1
TRINITY_DN42_c0_g1_i2	3847	23.05	0	0.18	0	0.12	0	-7.43157	tr|A0A0K9QD09|A0A0K9QD09_SPIOL Uncharacterized protein OS=Spinacia oleracea OX=3562 GN=SOVF_193000 PE=4 SV=1
TRINITY_DN4359_c0_g2_i16	1941	22.64	0	0.37	0	0.25	0	-7.43157	tr|A0A0K9QC82|A0A0K9QC82_SPIOL Uncharacterized protein (Fragment) OS=Spinacia oleracea OX=3562 GN=SOVF_195690 PE=4 SV=1
TRINITY_DN4511_c0_g1_i3	316	22.81	0	4.82	0	3.33	0	-7.43157	-
TRINITY_DN5613_c0_g1_i7	2003	22.61	0	0.36	0	0.24	0	-7.43157	tr|A0A0J8B5G9|A0A0J8B5G9_BETVU Uncharacterized protein OS=Beta vulgaris subsp. vulgaris OX=3555 GN=BVRB_013000 PE=4 SV=1
TRINITY_DN5680_c1_g1_i3	1141	23.18	0	0.69	0	0.48	0	-7.43157	tr|A0A0K9QK90|A0A0K9QK90_SPIOL Uncharacterized protein OS=Spinacia oleracea OX=3562 GN=SOVF_174890 PE=4 SV=1
TRINITY_DN6372_c0_g1_i18	4119	22.64	0	0.16	0	0.11	0	-7.43157	tr|A0A0K9QY91|A0A0K9QY91_SPIOL Uncharacterized protein OS=Spinacia oleracea OX=3562 GN=SOVF_133240 PE=4 SV=1
TRINITY_DN6400_c0_g1_i17	1783	22.89	0	0.41	0	0.28	0	-7.43157	tr|A0A0K9RI59|A0A0K9RI59_SPIOL Uncharacterized protein OS=Spinacia oleracea OX=3562 GN=SOVF_069540 PE=3 SV=1
TRINITY_DN6584_c0_g1_i4	1691	23.15	0	0.44	0	0.3	0	-7.43157	tr|A0A0K9QHD4|A0A0K9QHD4_SPIOL Uncharacterized protein OS=Spinacia oleracea OX=3562 GN=SOVF_179100 PE=4 SV=1
TRINITY_DN7019_c0_g1_i32	2268	22.52	0	0.31	0	0.21	0	-7.43157	tr|A0A0K9RIV8|A0A0K9RIV8_SPIOL Uncharacterized protein OS=Spinacia oleracea OX=3562 GN=SOVF_061660 PE=4 SV=1
TRINITY_DN7065_c0_g1_i6	6507	22.78	0	0.1	0	0.07	0	-7.43157	tr|A0A0K9QWM4|A0A0K9QWM4_SPIOL Uncharacterized protein OS=Spinacia oleracea OX=3562 GN=SOVF_133110 PE=4 SV=1
TRINITY_DN7676_c0_g1_i1	767	23	0	1.13	0	0.78	0	-7.43157	-
TRINITY_DN8026_c0_g1_i5	2077	23.15	0	0.35	0	0.24	0	-7.43157	tr|A0A0K9RR77|A0A0K9RR77_SPIOL Uncharacterized protein OS=Spinacia oleracea OX=3562 GN=SOVF_037700 PE=4 SV=1
TRINITY_DN8604_c0_g1_i4	1921	23.46	0	0.39	0	0.27	0	-7.43157	tr|A0A0K9Q7N9|A0A0K9Q7N9_SPIOL Uncharacterized protein (Fragment) OS=Spinacia oleracea OX=3562 GN=SOVF_216160 PE=4 SV=1
TRINITY_DN9079_c0_g2_i3	2269	23.25	0	0.32	0	0.22	0	-7.43157	tr|A0A0K9S1U0|A0A0K9S1U0_SPIOL Uncharacterized protein OS=Spinacia oleracea OX=3562 GN=SOVF_003370 PE=3 SV=1
TRINITY_DN9110_c1_g1_i1	1713	22.84	0	0.43	0	0.29	0	-7.43157	tr|Q8L6W3|Q8L6W3_BETVU Neutral invertase OS=Beta vulgaris OX=161934 GN=ninv PE=2 SV=1
TRINITY_DN9665_c1_g1_i1	2764	23.13	0	0.26	0	0.18	0	-7.43157	tr|A0A0K9R3L5|A0A0K9R3L5_SPIOL Uncharacterized protein OS=Spinacia oleracea OX=3562 GN=SOVF_110930 PE=4 SV=1
TRINITY_DN11608_c0_g1_i17	3450	21.9	0	0.19	0	0.13	0	-7.36782	tr|A0A0K9RGY3|A0A0K9RGY3_SPIOL Trehalose 6-phosphate phosphatase OS=Spinacia oleracea OX=3562 GN=SOVF_067850 PE=3 SV=1
TRINITY_DN11973_c0_g3_i4	727	22.11	0	1.16	0	0.8	0	-7.36782	tr|A0A0K9RZM3|A0A0K9RZM3_SPIOL Uncharacterized protein OS=Spinacia oleracea OX=3562 GN=SOVF_016740 PE=4 SV=1
TRINITY_DN12132_c0_g2_i1	1296	22.04	0	0.57	0	0.39	0	-7.36782	-
TRINITY_DN12601_c0_g1_i13	2299	21.56	0	0.29	0	0.2	0	-7.36782	tr|A0A0K9QIH3|A0A0K9QIH3_SPIOL Uncharacterized protein OS=Spinacia oleracea OX=3562 GN=SOVF_175580 PE=4 SV=1
TRINITY_DN12650_c0_g1_i1	1337	22.07	0	0.55	0	0.38	0	-7.36782	tr|A0A0K9S2A8|A0A0K9S2A8_SPIOL Uncharacterized protein OS=Spinacia oleracea OX=3562 GN=SOVF_002240 PE=3 SV=1
TRINITY_DN13551_c0_g1_i4	832	22.06	0	0.97	0	0.67	0	-7.36782	tr|A0A0K9QDF8|A0A0K9QDF8_SPIOL Uncharacterized protein OS=Spinacia oleracea OX=3562 GN=SOVF_198420 PE=4 SV=1
TRINITY_DN13820_c0_g1_i2	580	22.41	0	1.62	0	1.12	0	-7.36782	-
TRINITY_DN1419_c0_g1_i2	2315	21.85	0	0.29	0	0.2	0	-7.36782	tr|A0A0K9RW28|A0A0K9RW28_SPIOL Uncharacterized protein OS=Spinacia oleracea OX=3562 GN=SOVF_027980 PE=4 SV=1
TRINITY_DN16422_c0_g1_i3	2327	21.89	0	0.29	0	0.2	0	-7.36782	tr|J3SIC4|J3SIC4_BETVU ATP-dependent DNA helicase OS=Beta vulgaris subsp. vulgaris OX=3555 PE=3 SV=1
TRINITY_DN17174_c0_g1_i2	979	22.01	0	0.79	0	0.55	0	-7.36782	tr|A0A0K9RFP1|A0A0K9RFP1_SPIOL Uncharacterized protein (Fragment) OS=Spinacia oleracea OX=3562 GN=SOVF_071950 PE=4 SV=1
TRINITY_DN2252_c1_g1_i1	1463	21.74	0.34	0.49	0.01	0.33	0.01	-7.36782	tr|A0A0K9QG51|A0A0K9QG51_SPIOL Uncharacterized protein (Fragment) OS=Spinacia oleracea OX=3562 GN=SOVF_188510 PE=4 SV=1
TRINITY_DN22732_c0_g1_i4	1998	22.2	0	0.35	0	0.24	0	-7.36782	tr|A0A0K9QBI8|A0A0K9QBI8_SPIOL Uncharacterized protein OS=Spinacia oleracea OX=3562 GN=SOVF_197870 PE=4 SV=1
TRINITY_DN227_c0_g1_i3	1225	22.43	0	0.62	0	0.42	0	-7.36782	tr|A0A0K9RCS0|A0A0K9RCS0_SPIOL Uncharacterized protein OS=Spinacia oleracea OX=3562 GN=SOVF_081140 PE=4 SV=1
TRINITY_DN2556_c1_g1_i2	979	21.67	0	0.78	0	0.54	0	-7.36782	-
TRINITY_DN2999_c0_g1_i2	1888	22.05	0	0.37	0	0.25	0	-7.36782	tr|A0A0K9S2H4|A0A0K9S2H4_SPIOL Uncharacterized protein OS=Spinacia oleracea OX=3562 GN=SOVF_001960 PE=4 SV=1
TRINITY_DN3176_c0_g1_i3	2127	22.17	0	0.33	0	0.22	0	-7.36782	tr|A0A0K9RZE7|A0A0K9RZE7_SPIOL Uncharacterized protein OS=Spinacia oleracea OX=3562 GN=SOVF_011520 PE=3 SV=1
TRINITY_DN3245_c0_g1_i8	3023	22.18	0	0.22	0	0.15	0	-7.36782	tr|A0A0K9RGJ7|A0A0K9RGJ7_SPIOL Uncharacterized protein OS=Spinacia oleracea OX=3562 GN=SOVF_069330 PE=4 SV=1
TRINITY_DN3323_c0_g1_i6	630	22.43	0	1.44	0	0.99	0	-7.36782	tr|A0A0K9RWN5|A0A0K9RWN5_SPIOL Uncharacterized protein OS=Spinacia oleracea OX=3562 GN=SOVF_025740 PE=4 SV=1
TRINITY_DN3359_c0_g1_i5	1579	22.41	0	0.46	0	0.32	0	-7.36782	tr|A0A0K9Q9C5|A0A0K9Q9C5_SPIOL Uncharacterized protein OS=Spinacia oleracea OX=3562 GN=SOVF_204810 PE=4 SV=1
TRINITY_DN3570_c0_g1_i8	838	21.79	0	0.95	0	0.66	0	-7.36782	-
TRINITY_DN3801_c2_g1_i1	399	21.56	0	2.86	0	1.97	0	-7.36782	-
TRINITY_DN4188_c0_g1_i3	454	21.65	0	2.29	0	1.58	0	-7.36782	-
TRINITY_DN4362_c0_g1_i3	512	22.18	0	1.93	0	1.33	0	-7.36782	tr|A0A0J8B1W2|A0A0J8B1W2_BETVU Uncharacterized protein OS=Beta vulgaris subsp. vulgaris OX=3555 GN=BVRB_013260 PE=4 SV=1
TRINITY_DN5383_c0_g3_i2	2165	21.78	0	0.31	0	0.22	0	-7.36782	tr|A0A0K9R663|A0A0K9R663_SPIOL Uncharacterized protein OS=Spinacia oleracea OX=3562 GN=SOVF_101700 PE=4 SV=1
TRINITY_DN543_c0_g1_i7	1640	22.33	0	0.44	0	0.3	0	-7.36782	tr|A0A0K9R9W9|A0A0K9R9W9_SPIOL Uncharacterized protein OS=Spinacia oleracea OX=3562 GN=SOVF_090170 PE=4 SV=1
TRINITY_DN5565_c1_g2_i4	1581	21.72	0.29	0.44	0.01	0.31	0	-7.36782	tr|A0A0K9R9A1|A0A0K9R9A1_SPIOL Uncharacterized protein OS=Spinacia oleracea OX=3562 GN=SOVF_099040 PE=4 SV=1
TRINITY_DN598_c0_g1_i15	4574	22.22	0	0.14	0	0.1	0	-7.36782	tr|A0FD17|A0FD17_BETVU NBS-LRR type resistance protein OS=Beta vulgaris OX=161934 PE=2 SV=1
TRINITY_DN6172_c0_g1_i5	2108	21.75	0	0.32	0	0.22	0	-7.36782	tr|A0A0J8BES3|A0A0J8BES3_BETVU Uncharacterized protein OS=Beta vulgaris subsp. vulgaris OX=3555 GN=BVRB_2g045600 PE=3 SV=1
TRINITY_DN6247_c0_g1_i1	4627	22.39	0	0.14	0	0.1	0	-7.36782	tr|A0A0K9QUS2|A0A0K9QUS2_SPIOL Uncharacterized protein OS=Spinacia oleracea OX=3562 GN=SOVF_143790 PE=4 SV=1
TRINITY_DN625_c1_g1_i1	928	22	0	0.84	0	0.58	0	-7.36782	-
TRINITY_DN640_c0_g2_i2	3108	22.28	0	0.22	0	0.15	0	-7.36782	tr|A0A0K9RYT0|A0A0K9RYT0_SPIOL Uncharacterized protein OS=Spinacia oleracea OX=3562 GN=SOVF_013500 PE=4 SV=1
TRINITY_DN643_c0_g1_i5	2632	22.11	0	0.26	0	0.18	0	-7.36782	tr|A0A0K9RMP8|A0A0K9RMP8_SPIOL Peptidyl-prolyl cis-trans isomerase OS=Spinacia oleracea OX=3562 GN=SOVF_049330 PE=3 SV=1
TRINITY_DN7004_c0_g1_i5	3063	22.31	0	0.22	0	0.15	0	-7.36782	tr|A0A0K9QZT2|A0A0K9QZT2_SPIOL Uncharacterized protein OS=Spinacia oleracea OX=3562 GN=SOVF_129380 PE=3 SV=1
TRINITY_DN7403_c0_g2_i1	3093	21.57	0	0.21	0	0.15	0	-7.36782	tr|A0A0K9QTT6|A0A0K9QTT6_SPIOL Uncharacterized protein OS=Spinacia oleracea OX=3562 GN=SOVF_141300 PE=4 SV=1
TRINITY_DN8321_c2_g1_i4	814	21.86	0	0.99	0	0.68	0	-7.36782	-
TRINITY_DN8766_c0_g1_i6	1067	22	0	0.71	0	0.49	0	-7.36782	tr|A0A0K9QMS4|A0A0K9QMS4_SPIOL Uncharacterized protein OS=Spinacia oleracea OX=3562 GN=SOVF_161460 PE=4 SV=1
TRINITY_DN879_c0_g1_i7	3262	22.19	0	0.21	0	0.14	0	-7.36782	tr|A0A0K9RL89|A0A0K9RL89_SPIOL Uncharacterized protein OS=Spinacia oleracea OX=3562 GN=SOVF_059440 PE=4 SV=1
TRINITY_DN9735_c0_g1_i3	1950	22.06	0	0.36	0	0.25	0	-7.36782	tr|F4NCJ8|F4NCJ8_BETVU Uncharacterized protein OS=Beta vulgaris subsp. vulgaris OX=3555 PE=4 SV=1
TRINITY_DN9853_c0_g1_i7	872	21.88	0	0.91	0	0.63	0	-7.36782	tr|A0A0K9QK13|A0A0K9QK13_SPIOL Uncharacterized protein OS=Spinacia oleracea OX=3562 GN=SOVF_170240 PE=4 SV=1
TRINITY_DN10415_c2_g3_i6	1215	20.77	0	0.58	0	0.4	0	-7.30112	tr|A0A0K9S311|A0A0K9S311_SPIOL Reticulon-like protein OS=Spinacia oleracea OX=3562 GN=SOVF_005310 PE=4 SV=1
TRINITY_DN1044_c0_g1_i15	6714	20.54	0	0.09	0	0.06	0	-7.30112	tr|A0A0K9R9D0|A0A0K9R9D0_SPIOL Uncharacterized protein (Fragment) OS=Spinacia oleracea OX=3562 GN=SOVF_096440 PE=4 SV=1
TRINITY_DN10638_c0_g1_i9	453	20.73	0	2.2	0	1.52	0	-7.30112	-
TRINITY_DN1167_c0_g1_i10	1407	21.12	0	0.49	0	0.34	0	-7.30112	-
TRINITY_DN11691_c0_g1_i4	1370	20.74	0	0.5	0	0.34	0	-7.30112	tr|A0A0K9RYY1|A0A0K9RYY1_SPIOL Uncharacterized protein OS=Spinacia oleracea OX=3562 GN=SOVF_018480 PE=4 SV=1
TRINITY_DN13187_c0_g1_i8	732	21.15	0	1.1	0	0.76	0	-7.30112	-
TRINITY_DN13284_c0_g1_i11	2711	21.3	0	0.24	0	0.17	0	-7.30112	tr|A0A0K9R1B0|A0A0K9R1B0_SPIOL Uncharacterized protein OS=Spinacia oleracea OX=3562 GN=SOVF_115880 PE=4 SV=1
TRINITY_DN1353_c1_g1_i4	2436	21.04	0	0.27	0	0.18	0	-7.30112	tr|A0A0K9REV3|A0A0K9REV3_SPIOL Uncharacterized protein OS=Spinacia oleracea OX=3562 GN=SOVF_074670 PE=4 SV=1
TRINITY_DN13653_c0_g4_i1	510	21	0	1.84	0	1.27	0	-7.30112	-
TRINITY_DN1433_c0_g1_i6	2000	21.18	0	0.33	0	0.23	0	-7.30112	tr|A0A0K9QIA9|A0A0K9QIA9_SPIOL Uncharacterized protein OS=Spinacia oleracea OX=3562 GN=SOVF_182260 PE=4 SV=1
TRINITY_DN1480_c2_g1_i4	2065	21.06	0.22	0.32	0	0.22	0	-7.30112	tr|A0A0J8BC42|A0A0J8BC42_BETVU Uncharacterized protein OS=Beta vulgaris subsp. vulgaris OX=3555 GN=BVRB_5g125340 PE=4 SV=1
TRINITY_DN1595_c0_g1_i9	2543	20.7	0	0.25	0	0.17	0	-7.30112	tr|A0A0K9QUX1|A0A0K9QUX1_SPIOL Uncharacterized protein OS=Spinacia oleracea OX=3562 GN=SOVF_138600 PE=4 SV=1
TRINITY_DN16585_c0_g1_i2	1705	21.21	0	0.4	0	0.27	0	-7.30112	-
TRINITY_DN17662_c0_g1_i12	1559	21.13	0	0.44	0	0.3	0	-7.30112	tr|A0A0K9Q755|A0A0K9Q755_SPIOL Uncharacterized protein OS=Spinacia oleracea OX=3562 GN=SOVF_213340 PE=4 SV=1
TRINITY_DN17864_c0_g1_i2	575	21	0	1.53	0	1.06	0	-7.30112	tr|E7BQD5|E7BQD5_SILLA Gag-pol polyprotein OS=Silene latifolia OX=37657 PE=4 SV=1
TRINITY_DN18700_c0_g3_i1	652	21.17	0	1.29	0	0.89	0	-7.30112	tr|A0A0J8B7R2|A0A0J8B7R2_BETVU Uncharacterized protein OS=Beta vulgaris subsp. vulgaris OX=3555 GN=BVRB_7g179680 PE=4 SV=1
TRINITY_DN19029_c0_g1_i3	1325	20.64	0	0.52	0	0.36	0	-7.30112	tr|A0A0K9R3Y7|A0A0K9R3Y7_SPIOL Uncharacterized protein OS=Spinacia oleracea OX=3562 GN=SOVF_114830 PE=4 SV=1
TRINITY_DN2127_c0_g1_i9	3857	20.65	0	0.16	0	0.11	0	-7.30112	tr|A0A0K9QTE8|A0A0K9QTE8_SPIOL Uncharacterized protein OS=Spinacia oleracea OX=3562 GN=SOVF_143210 PE=3 SV=1
TRINITY_DN2149_c0_g1_i20	2569	20.94	0	0.25	0	0.17	0	-7.30112	tr|A0A0K9RFE8|A0A0K9RFE8_SPIOL Uncharacterized protein OS=Spinacia oleracea OX=3562 GN=SOVF_073040 PE=4 SV=1
TRINITY_DN23243_c0_g1_i6	2623	20.6	0.21	0.24	0	0.17	0	-7.30112	tr|A0A0K9RLS9|A0A0K9RLS9_SPIOL Uncharacterized protein OS=Spinacia oleracea OX=3562 GN=SOVF_051820 PE=4 SV=1
TRINITY_DN2379_c0_g1_i7	3425	20.95	0	0.18	0	0.13	0	-7.30112	tr|A0A0K9RJZ5|A0A0K9RJZ5_SPIOL Uncharacterized protein OS=Spinacia oleracea OX=3562 GN=SOVF_057890 PE=4 SV=1
TRINITY_DN2456_c1_g2_i1	3583	20.9	0	0.18	0	0.12	0	-7.30112	tr|A0A0K9QXA1|A0A0K9QXA1_SPIOL Uncharacterized protein (Fragment) OS=Spinacia oleracea OX=3562 GN=SOVF_130730 PE=4 SV=1
TRINITY_DN2548_c0_g1_i4	3455	20.96	0	0.18	0	0.13	0	-7.30112	tr|A0A0J8BBB4|A0A0J8BBB4_BETVU Uncharacterized protein OS=Beta vulgaris subsp. vulgaris OX=3555 GN=BVRB_4g095040 PE=4 SV=1
TRINITY_DN2677_c0_g1_i2	2087	21.14	0	0.32	0	0.22	0	-7.30112	tr|A0A0K9RJF3|A0A0K9RJF3_SPIOL Nuclear cap-binding protein subunit 2 OS=Spinacia oleracea OX=3562 GN=SOVF_060000 PE=3 SV=1
TRINITY_DN2726_c0_g1_i8	4081	21.08	0	0.15	0	0.11	0	-7.30112	tr|A0A0K9QWL1|A0A0K9QWL1_SPIOL Uncharacterized protein OS=Spinacia oleracea OX=3562 GN=SOVF_139800 PE=4 SV=1
TRINITY_DN27478_c0_g1_i3	1316	21	0	0.53	0	0.37	0	-7.30112	-
TRINITY_DN3043_c0_g1_i1	1540	21.2	0	0.45	0	0.31	0	-7.30112	tr|A0A0K9RSN5|A0A0K9RSN5_SPIOL Uncharacterized protein OS=Spinacia oleracea OX=3562 GN=SOVF_040060 PE=4 SV=1
TRINITY_DN3097_c0_g1_i7	3054	21.42	0	0.21	0	0.15	0	-7.30112	tr|A0A0K9RG35|A0A0K9RG35_SPIOL Uncharacterized protein OS=Spinacia oleracea OX=3562 GN=SOVF_070860 PE=3 SV=1
TRINITY_DN3267_c0_g1_i1	641	21.17	0	1.32	0	0.91	0	-7.30112	-
TRINITY_DN3336_c0_g1_i4	2294	20.56	0	0.28	0	0.19	0	-7.30112	tr|A0A0J8B4L4|A0A0J8B4L4_BETVU Uncharacterized protein OS=Beta vulgaris subsp. vulgaris OX=3555 GN=BVRB_015220 PE=4 SV=1
TRINITY_DN3479_c0_g1_i4	1818	20.82	0	0.36	0	0.25	0	-7.30112	tr|A0A0K9RH05|A0A0K9RH05_SPIOL Uncharacterized protein OS=Spinacia oleracea OX=3562 GN=SOVF_067780 PE=3 SV=1
TRINITY_DN3504_c0_g1_i11	2819	20.9	0	0.23	0	0.16	0	-7.30112	tr|J3S7K7|J3S7K7_BETVU Mariner transposase OS=Beta vulgaris subsp. vulgaris OX=3555 PE=4 SV=1
TRINITY_DN3805_c0_g1_i7	3550	20.75	0	0.18	0	0.12	0	-7.30112	tr|A0A0K9QUU0|A0A0K9QUU0_SPIOL Uncharacterized protein OS=Spinacia oleracea OX=3562 GN=SOVF_146140 PE=4 SV=1
TRINITY_DN3836_c0_g2_i1	777	20.84	0	1	0	0.69	0	-7.30112	tr|A0A0K9QFK6|A0A0K9QFK6_SPIOL Uncharacterized protein OS=Spinacia oleracea OX=3562 GN=SOVF_184640 PE=3 SV=1
TRINITY_DN4137_c0_g2_i5	5134	20.69	0	0.12	0	0.08	0	-7.30112	tr|A0A0K9RS59|A0A0K9RS59_SPIOL Uncharacterized protein OS=Spinacia oleracea OX=3562 GN=SOVF_034480 PE=4 SV=1
TRINITY_DN4166_c0_g1_i6	2320	21.37	0	0.29	0	0.2	0	-7.30112	tr|A0A0K9RY84|A0A0K9RY84_SPIOL Uncharacterized protein OS=Spinacia oleracea OX=3562 GN=SOVF_015200 PE=4 SV=1
TRINITY_DN4395_c0_g1_i4	431	21.43	0	2.47	0	1.71	0	-7.30112	tr|A0A0J8FQA8|A0A0J8FQA8_BETVU Uncharacterized protein OS=Beta vulgaris subsp. vulgaris OX=3555 GN=BVRB_2g033040 PE=4 SV=1
TRINITY_DN4630_c0_g1_i6	3100	20.99	0.01	0.21	0	0.14	0	-7.30112	tr|A0A0K9QQL5|A0A0K9QQL5_SPIOL Uncharacterized protein OS=Spinacia oleracea OX=3562 GN=SOVF_152650 PE=4 SV=1
TRINITY_DN4727_c0_g1_i13	2957	20.95	0	0.22	0	0.15	0	-7.30112	tr|A0A0K9RHK7|A0A0K9RHK7_SPIOL Uncharacterized protein OS=Spinacia oleracea OX=3562 GN=SOVF_065790 PE=4 SV=1
TRINITY_DN5073_c0_g1_i6	5596	20.96	0	0.11	0	0.08	0	-7.30112	tr|A0A0J8E2U9|A0A0J8E2U9_BETVU Phospholipid-transporting ATPase OS=Beta vulgaris subsp. vulgaris OX=3555 GN=BVRB_5g127060 PE=3 SV=1
TRINITY_DN5276_c0_g1_i2	373	21.1	0	3.17	0	2.19	0	-7.30112	tr|A0A0J8CX16|A0A0J8CX16_BETVU Ribosomal protein L37 OS=Beta vulgaris subsp. vulgaris OX=3555 GN=BVRB_2g031760 PE=3 SV=1
TRINITY_DN5487_c0_g1_i4	1018	21.38	0	0.73	0	0.5	0	-7.30112	tr|A0A0K9R4U4|A0A0K9R4U4_SPIOL Uncharacterized protein OS=Spinacia oleracea OX=3562 GN=SOVF_111800 PE=4 SV=1
TRINITY_DN5863_c0_g3_i4	248	21	0	8.14	0	5.61	0	-7.30112	-
TRINITY_DN5890_c0_g1_i2	3315	20.65	0	0.19	0	0.13	0	-7.30112	tr|A0A0K9RHQ0|A0A0K9RHQ0_SPIOL Uncharacterized protein OS=Spinacia oleracea OX=3562 GN=SOVF_065030 PE=4 SV=1
TRINITY_DN5968_c0_g1_i12	2696	21.45	0	0.24	0	0.17	0	-7.30112	tr|A0A0K9RWW1|A0A0K9RWW1_SPIOL Uncharacterized protein OS=Spinacia oleracea OX=3562 GN=SOVF_024980 PE=4 SV=1
TRINITY_DN6101_c1_g1_i3	680	20.98	0	1.21	0	0.83	0	-7.30112	-
TRINITY_DN6245_c0_g1_i3	2711	21.34	0	0.24	0	0.17	0	-7.30112	tr|A0A0K9R0R3|A0A0K9R0R3_SPIOL Uncharacterized protein OS=Spinacia oleracea OX=3562 GN=SOVF_126260 PE=4 SV=1
TRINITY_DN6454_c0_g1_i1	892	20.6	0	0.83	0	0.57	0	-7.30112	tr|A0A0K9R5T8|A0A0K9R5T8_SPIOL Uncharacterized protein OS=Spinacia oleracea OX=3562 GN=SOVF_102920 PE=4 SV=1
TRINITY_DN6490_c0_g1_i2	951	20.93	0	0.78	0	0.54	0	-7.30112	tr|A0A0K9RK92|A0A0K9RK92_SPIOL Uncharacterized protein OS=Spinacia oleracea OX=3562 GN=SOVF_056960 PE=4 SV=1
TRINITY_DN6509_c0_g1_i7	2967	21.36	0	0.22	0	0.15	0	-7.30112	tr|A0A0J8B572|A0A0J8B572_BETVU Uncharacterized protein OS=Beta vulgaris subsp. vulgaris OX=3555 GN=BVRB_013470 PE=4 SV=1
TRINITY_DN6870_c0_g1_i2	2110	20.94	0	0.31	0	0.21	0	-7.30112	tr|A0A0K9RL21|A0A0K9RL21_SPIOL Uncharacterized protein OS=Spinacia oleracea OX=3562 GN=SOVF_054390 PE=4 SV=1
TRINITY_DN7415_c0_g1_i7	357	21	0	3.44	0	2.37	0	-7.30112	-
TRINITY_DN7850_c0_g2_i13	884	21.45	0	0.88	0	0.6	0	-7.30112	tr|A0A0K9QE89|A0A0K9QE89_SPIOL Uncharacterized protein OS=Spinacia oleracea OX=3562 GN=SOVF_188950 PE=4 SV=1
TRINITY_DN8366_c0_g1_i6	1643	20.76	0	0.41	0	0.28	0	-7.30112	tr|A0A0K9RLA9|A0A0K9RLA9_SPIOL Uncharacterized protein OS=Spinacia oleracea OX=3562 GN=SOVF_053560 PE=4 SV=1
TRINITY_DN8600_c0_g1_i5	684	21.43	0	1.22	0	0.84	0	-7.30112	tr|A0A0K9RTX8|A0A0K9RTX8_SPIOL Uncharacterized protein OS=Spinacia oleracea OX=3562 GN=SOVF_029930 PE=4 SV=1
TRINITY_DN898_c0_g1_i11	282	21.03	0	5.8	0	4	0	-7.30112	tr|A0A0K9R4N7|A0A0K9R4N7_SPIOL Uncharacterized protein (Fragment) OS=Spinacia oleracea OX=3562 GN=SOVF_112370 PE=4 SV=1
TRINITY_DN9533_c1_g1_i2	529	20.57	0	1.7	0	1.17	0	-7.30112	-
TRINITY_DN9978_c4_g1_i1	534	21	0	1.71	0	1.18	0	-7.30112	-
TRINITY_DN494_c0_g1_i9	2345	201.08	0.82	2.66	0.01	1.83	0.01	-7.28543	tr|A0A0K9RXH5|A0A0K9RXH5_SPIOL Uncharacterized protein OS=Spinacia oleracea OX=3562 GN=SOVF_017630 PE=4 SV=1
TRINITY_DN7346_c0_g1_i4	2081	197.3	1.16	2.97	0.02	2.05	0.01	-7.25645	tr|A0A0K9QAB9|A0A0K9QAB9_SPIOL Uncharacterized protein OS=Spinacia oleracea OX=3562 GN=SOVF_201810 PE=3 SV=1
TRINITY_DN10101_c0_g1_i3	376	19.57	0	2.9	0	2	0	-7.23119	-
TRINITY_DN10379_c0_g1_i7	1779	20.34	0	0.36	0	0.25	0	-7.23119	tr|A2I5E5|A2I5E5_BETVU Retrotransposon protein OS=Beta vulgaris OX=161934 PE=4 SV=1
TRINITY_DN1044_c0_g1_i45	6719	20.3	0	0.09	0	0.06	0	-7.23119	tr|A0A0K9R9D0|A0A0K9R9D0_SPIOL Uncharacterized protein (Fragment) OS=Spinacia oleracea OX=3562 GN=SOVF_096440 PE=4 SV=1
TRINITY_DN10689_c0_g1_i6	2913	19.85	0	0.21	0	0.14	0	-7.23119	tr|A0A0K9RVP5|A0A0K9RVP5_SPIOL Uncharacterized protein OS=Spinacia oleracea OX=3562 GN=SOVF_028790 PE=4 SV=1
TRINITY_DN10904_c0_g2_i3	544	19.97	0	1.58	0	1.09	0	-7.23119	-
TRINITY_DN10957_c0_g3_i5	481	20.48	0	1.97	0	1.36	0	-7.23119	-
TRINITY_DN1167_c0_g1_i11	1229	19.52	0	0.53	0	0.37	0	-7.23119	-
TRINITY_DN12318_c0_g1_i1	1952	19.6	0	0.32	0	0.22	0	-7.23119	tr|A0A0J8DVB5|A0A0J8DVB5_BETVU Uncharacterized protein OS=Beta vulgaris subsp. vulgaris OX=3555 GN=BVRB_015320 PE=4 SV=1
TRINITY_DN12374_c0_g1_i1	927	20	0	0.77	0	0.53	0	-7.23119	-
TRINITY_DN1321_c0_g2_i3	2233	19.86	0	0.28	0	0.19	0	-7.23119	tr|E7BQD5|E7BQD5_SILLA Gag-pol polyprotein OS=Silene latifolia OX=37657 PE=4 SV=1
TRINITY_DN1354_c1_g1_i2	3669	19.75	0	0.16	0	0.11	0	-7.23119	tr|A0A0K9R6N4|A0A0K9R6N4_SPIOL Uncharacterized protein OS=Spinacia oleracea OX=3562 GN=SOVF_100260 PE=4 SV=1
TRINITY_DN1418_c0_g1_i1	1396	19.77	0	0.47	0	0.32	0	-7.23119	tr|A0A0K9R289|A0A0K9R289_SPIOL Uncharacterized protein OS=Spinacia oleracea OX=3562 GN=SOVF_115070 PE=4 SV=1
TRINITY_DN14240_c0_g2_i1	557	19.97	0	1.53	0	1.05	0	-7.23119	-
TRINITY_DN14435_c0_g1_i1	1199	20.42	0	0.57	0	0.4	0	-7.23119	tr|A0A0K9QFR1|A0A0K9QFR1_SPIOL Uncharacterized protein OS=Spinacia oleracea OX=3562 GN=SOVF_190710 PE=3 SV=1
TRINITY_DN1486_c0_g1_i6	2802	20.11	0	0.22	0	0.15	0	-7.23119	tr|A0A0K9QE44|A0A0K9QE44_SPIOL Uncharacterized protein OS=Spinacia oleracea OX=3562 GN=SOVF_196350 PE=4 SV=1
TRINITY_DN16260_c0_g1_i1	1068	20	0	0.65	0	0.45	0	-7.23119	tr|A0A0K9RBD7|A0A0K9RBD7_SPIOL Uncharacterized protein (Fragment) OS=Spinacia oleracea OX=3562 GN=SOVF_085810 PE=4 SV=1
TRINITY_DN16932_c0_g1_i2	391	20.4	0	2.8	0	1.93	0	-7.23119	-
TRINITY_DN17848_c0_g1_i1	1120	20	0	0.61	0	0.42	0	-7.23119	tr|A0A0K9QUV8|A0A0K9QUV8_SPIOL Uncharacterized protein (Fragment) OS=Spinacia oleracea OX=3562 GN=SOVF_138700 PE=4 SV=1
TRINITY_DN18039_c0_g1_i4	837	20.05	0	0.88	0	0.61	0	-7.23119	tr|A0A0K9QL00|A0A0K9QL00_SPIOL Uncharacterized protein OS=Spinacia oleracea OX=3562 GN=SOVF_167210 PE=4 SV=1
TRINITY_DN18072_c0_g1_i1	501	19.79	0	1.78	0	1.23	0	-7.23119	-
TRINITY_DN1900_c0_g2_i12	1854	19.99	0	0.34	0	0.24	0	-7.23119	tr|A0A0K9R954|A0A0K9R954_SPIOL Uncharacterized protein OS=Spinacia oleracea OX=3562 GN=SOVF_091630 PE=4 SV=1
TRINITY_DN2076_c0_g1_i7	1634	19.71	0	0.39	0	0.27	0	-7.23119	tr|A0A0K9QRS3|A0A0K9QRS3_SPIOL Uncharacterized protein OS=Spinacia oleracea OX=3562 GN=SOVF_148890 PE=4 SV=1
TRINITY_DN21054_c0_g2_i1	349	20	0.01	3.43	0	2.36	0	-7.23119	-
TRINITY_DN2218_c1_g1_i4	2560	20.37	0	0.24	0	0.17	0	-7.23119	tr|A0A0K9RZB7|A0A0K9RZB7_SPIOL Uncharacterized protein OS=Spinacia oleracea OX=3562 GN=SOVF_017110 PE=4 SV=1
TRINITY_DN25175_c0_g1_i1	1142	19.62	0	0.59	0	0.4	0	-7.23119	tr|A0A0K9RTL6|A0A0K9RTL6_SPIOL Uncharacterized protein OS=Spinacia oleracea OX=3562 GN=SOVF_030130 PE=4 SV=1
TRINITY_DN25963_c0_g2_i2	536	20	0	1.62	0	1.12	0	-7.23119	-
TRINITY_DN2680_c0_g1_i1	3646	19.63	0	0.16	0	0.11	0	-7.23119	tr|A0A0K9RUU6|A0A0K9RUU6_SPIOL Uncharacterized protein OS=Spinacia oleracea OX=3562 GN=SOVF_026030 PE=4 SV=1
TRINITY_DN28051_c0_g1_i5	4189	19.99	0	0.14	0	0.1	0	-7.23119	tr|A0A0K9QM81|A0A0K9QM81_SPIOL Uncharacterized protein OS=Spinacia oleracea OX=3562 GN=SOVF_168550 PE=4 SV=1
TRINITY_DN3033_c0_g1_i7	343	20.1	0	3.57	0	2.46	0	-7.23119	-
TRINITY_DN3040_c0_g1_i6	1316	19.56	0	0.49	0	0.34	0	-7.23119	tr|Q20CF1|Q20CF1_BETVU 2-phytyl-1,4-beta-naphthoquinone methyltransferase, chloroplastic OS=Beta vulgaris OX=161934 GN=MENG PE=3 SV=1
TRINITY_DN3040_c0_g1_i8	1127	20.46	0	0.62	0	0.43	0	-7.23119	tr|Q20CF1|Q20CF1_BETVU 2-phytyl-1,4-beta-naphthoquinone methyltransferase, chloroplastic OS=Beta vulgaris OX=161934 GN=MENG PE=3 SV=1
TRINITY_DN3075_c0_g1_i2	2480	20.11	0	0.25	0	0.17	0	-7.23119	tr|A0A0K9RYC7|A0A0K9RYC7_SPIOL Uncharacterized protein OS=Spinacia oleracea OX=3562 GN=SOVF_015230 PE=3 SV=1
TRINITY_DN3229_c0_g1_i8	728	19.85	0	1.04	0	0.72	0	-7.23119	tr|A0A0K9QBU8|A0A0K9QBU8_SPIOL Uncharacterized protein OS=Spinacia oleracea OX=3562 GN=SOVF_196830 PE=4 SV=1
TRINITY_DN3307_c0_g1_i7	1155	19.5	0	0.57	0	0.4	0	-7.23119	tr|A0A0K9RDT9|A0A0K9RDT9_SPIOL Uncharacterized protein OS=Spinacia oleracea OX=3562 GN=SOVF_078350 PE=4 SV=1
TRINITY_DN3487_c2_g4_i1	385	19.64	0	2.78	0	1.92	0	-7.23119	-
TRINITY_DN3495_c0_g1_i13	4558	20.19	0.44	0.13	0	0.09	0	-7.23119	tr|A0A0K9QW10|A0A0K9QW10_SPIOL Uncharacterized protein OS=Spinacia oleracea OX=3562 GN=SOVF_135120 PE=4 SV=1
TRINITY_DN3504_c0_g1_i3	963	20.5	0	0.75	0	0.52	0	-7.23119	-
TRINITY_DN4087_c3_g2_i1	179	20.21	0	24.8	0	17.1	0	-7.23119	-
TRINITY_DN4144_c0_g1_i8	505	19.64	0	1.75	0	1.21	0	-7.23119	-
TRINITY_DN4659_c0_g1_i4	4637	19.59	0	0.13	0	0.09	0	-7.23119	tr|A0A0K9R7S2|A0A0K9R7S2_SPIOL Uncharacterized protein OS=Spinacia oleracea OX=3562 GN=SOVF_095870 PE=4 SV=1
TRINITY_DN4904_c0_g1_i1	1937	19.8	0	0.32	0	0.22	0	-7.23119	tr|A0A0J8B627|A0A0J8B627_BETVU Uncharacterized protein OS=Beta vulgaris subsp. vulgaris OX=3555 GN=BVRB_9g225100 PE=4 SV=1
TRINITY_DN4927_c0_g2_i5	1280	20.49	0	0.53	0	0.37	0	-7.23119	tr|A0A2R3XVL5|A0A2R3XVL5_9CARY CLC anion transporter CLCc1 OS=Suaeda altissima OX=224154 PE=2 SV=1
TRINITY_DN5060_c0_g1_i13	2107	20.03	0	0.3	0	0.21	0	-7.23119	tr|A0A0K9R6T3|A0A0K9R6T3_SPIOL Uncharacterized protein OS=Spinacia oleracea OX=3562 GN=SOVF_100160 PE=4 SV=1
TRINITY_DN5439_c0_g1_i5	2156	19.7	0	0.29	0	0.2	0	-7.23119	tr|A0A0K9RPB5|A0A0K9RPB5_SPIOL Uncharacterized protein OS=Spinacia oleracea OX=3562 GN=SOVF_049860 PE=4 SV=1
TRINITY_DN5497_c3_g1_i1	323	20.5	0	4.13	0	2.85	0	-7.23119	-
TRINITY_DN6167_c0_g1_i8	1696	20.37	0	0.38	0	0.27	0	-7.23119	tr|A0A0J8B3H7|A0A0J8B3H7_BETVU Uncharacterized protein OS=Beta vulgaris subsp. vulgaris OX=3555 GN=BVRB_007430 PE=4 SV=1
TRINITY_DN6188_c0_g1_i3	3682	19.75	0	0.16	0	0.11	0	-7.23119	tr|A0A0K9QXS9|A0A0K9QXS9_SPIOL Uncharacterized protein OS=Spinacia oleracea OX=3562 GN=SOVF_136250 PE=4 SV=1
TRINITY_DN6208_c0_g4_i4	921	20.19	0	0.78	0	0.54	0	-7.23119	tr|A0A0K9QGW1|A0A0K9QGW1_SPIOL Uncharacterized protein OS=Spinacia oleracea OX=3562 GN=SOVF_180810 PE=4 SV=1
TRINITY_DN623_c0_g1_i7	3272	20.35	0.32	0.19	0	0.13	0	-7.23119	tr|J3SHR5|J3SHR5_BETVU SNF2 domain-containing protein ATRX/CHR20 OS=Beta vulgaris subsp. vulgaris OX=3555 PE=4 SV=1
TRINITY_DN6704_c0_g1_i1	2330	20.21	0	0.27	0	0.19	0	-7.23119	tr|A0A0J8BEF4|A0A0J8BEF4_BETVU Uncharacterized protein OS=Beta vulgaris subsp. vulgaris OX=3555 GN=BVRB_4g093560 PE=4 SV=1
TRINITY_DN699_c0_g2_i15	1812	20.01	0	0.35	0	0.24	0	-7.23119	tr|A0A0K9QX36|A0A0K9QX36_SPIOL Uncharacterized protein (Fragment) OS=Spinacia oleracea OX=3562 GN=SOVF_136840 PE=3 SV=1
TRINITY_DN7218_c0_g1_i3	2019	19.81	0	0.31	0	0.21	0	-7.23119	tr|A0A0K9QXR5|A0A0K9QXR5_SPIOL Uncharacterized protein OS=Spinacia oleracea OX=3562 GN=SOVF_129420 PE=4 SV=1
TRINITY_DN7280_c0_g1_i5	1029	19.7	0	0.67	0	0.46	0	-7.23119	tr|A0A0K9REG1|A0A0K9REG1_SPIOL Uncharacterized protein OS=Spinacia oleracea OX=3562 GN=SOVF_080720 PE=4 SV=1
TRINITY_DN7651_c2_g1_i1	509	20	0	1.76	0	1.21	0	-7.23119	tr|A0A0K9S108|A0A0K9S108_SPIOL Lipoxygenase OS=Spinacia oleracea OX=3562 GN=SOVF_005490 PE=3 SV=1
TRINITY_DN7975_c0_g1_i1	157	20	0	46.8	0	32.27	0	-7.23119	-
TRINITY_DN8071_c3_g1_i1	319	20	0	4.14	0	2.86	0	-7.23119	-
TRINITY_DN8246_c0_g1_i1	1250	20.05	0	0.54	0	0.37	0	-7.23119	-
TRINITY_DN8666_c0_g1_i10	2594	19.99	0	0.24	0	0.16	0	-7.23119	tr|A0A0K9QZI8|A0A0K9QZI8_SPIOL Uncharacterized protein OS=Spinacia oleracea OX=3562 GN=SOVF_123720 PE=4 SV=1
TRINITY_DN1321_c1_g1_i11	1340	188.84	0.69	4.67	0.02	3.22	0.01	-7.19668	-
[truncated: 1,308 more rows]
