# Supplementary material for: Elucidation of the core betalain biosynthesis pathway in Amaranthus tricolor
Source: Sci Rep. 2021 Mar 17;11:6086. doi: 10.1038/s41598-021-85486-x (PMC7969944; doi:10.1038/s41598-021-85486-x)
Supplement: Supplementary file 4 — Supplementary Information 4. [file 41598_2021_85486_MOESM4_ESM.xlsx]

## Sheet: 工作表1
Supplementary Table S3. Up-regulated DEGs (differentially expressed genes) identified in AMR with FDR < 0.05 and logFC > 2.
Transcript_id	Length	Count (AMG)	Count (AMR)	TPM (AMG)	TPM (AMR)	FPKM (AMG)	FPKM (AMR)	logFC (AMG-AMR)	Description
TRINITY_DN1146_c0_g1_i3	2762	0	8016.06	0	91.94	0	61.17	16.0766	tr|O50036|O50036_SPIOL Heat shock 70 protein OS=Spinacia oleracea OX=3562 GN=HSC70-9 PE=2 SV=1
TRINITY_DN666_c0_g1_i2	5210	0	7389	0	43.47	0	28.92	15.9591	tr|A0A0K9QZM6|A0A0K9QZM6_SPIOL Uncharacterized protein OS=Spinacia oleracea OX=3562 GN=SOVF_129830 PE=4 SV=1
TRINITY_DN4593_c0_g1_i2	3150	0	6633.99	0	66.13	0	44	15.8036	tr|A0A0K9S078|A0A0K9S078_SPIOL Uncharacterized protein OS=Spinacia oleracea OX=3562 GN=SOVF_008760 PE=3 SV=1
TRINITY_DN1978_c0_g1_i2	1789	0	5884	0	108.4	0	72.13	15.6305	tr|A0A0K9QCI8|A0A0K9QCI8_SPIOL Uncharacterized protein OS=Spinacia oleracea OX=3562 GN=SOVF_194730 PE=4 SV=1
TRINITY_DN3034_c2_g1_i2	6525	0	5287.81	0	24.66	0	16.41	15.4764	tr|E7BQD5|E7BQD5_SILLA Gag-pol polyprotein OS=Silene latifolia OX=37657 PE=4 SV=1
TRINITY_DN12348_c0_g1_i1	1844	0	4896	0	87.21	0	58.03	15.3653	-
TRINITY_DN1603_c0_g1_i1	2914	0	3668.65	0	39.73	0	26.44	14.9491	tr|A0A0K9RB35|A0A0K9RB35_SPIOL Uncharacterized protein OS=Spinacia oleracea OX=3562 GN=SOVF_091100 PE=4 SV=1
TRINITY_DN256_c0_g2_i1	1020	0	3426.95	0	121.21	0	80.65	14.8507	tr|A0A0K9QPA3|A0A0K9QPA3_SPIOL Uncharacterized protein OS=Spinacia oleracea OX=3562 GN=SOVF_162940 PE=4 SV=1
TRINITY_DN2958_c0_g1_i4	2575	0	3162.83	0	39.11	0	26.02	14.735	tr|A0A0K9QKN3|A0A0K9QKN3_SPIOL Nucleolar GTP-binding protein 1 OS=Spinacia oleracea OX=3562 GN=SOVF_174800 PE=3 SV=1
TRINITY_DN65326_c0_g1_i1	1596	0	2988	0	62.57	0	41.63	14.6529	-
TRINITY_DN1283_c0_g2_i3	947	0	2946.29	0	114.19	0	75.98	14.6325	-
TRINITY_DN5686_c0_g1_i1	1550	0	2836	0	61.39	0	40.85	14.5776	-
TRINITY_DN12644_c0_g1_i1	3136	0	2822	0	28.26	0	18.81	14.5704	-
TRINITY_DN663_c0_g2_i2	1233	8.35	167467	0.23	4720.57	0.16	3140.97	14.5378	-
TRINITY_DN969_c1_g1_i17	7760	0	2677.92	0	10.45	0	6.95	14.4949	tr|A0A1B3TNU9|A0A1B3TNU9_MIRJA Integrase OS=Mirabilis jalapa OX=3538 PE=4 SV=1
TRINITY_DN2984_c0_g1_i1	3826	0	2566	0	20.83	0	13.86	14.4333	tr|A0A0K9RRB4|A0A0K9RRB4_SPIOL Formin-like protein OS=Spinacia oleracea OX=3562 GN=SOVF_037260 PE=3 SV=1
TRINITY_DN1018_c1_g2_i2	1480	0	2562	0	58.45	0	38.89	14.431	tr|A0A0K9R5E7|A0A0K9R5E7_SPIOL Uncharacterized protein OS=Spinacia oleracea OX=3562 GN=SOVF_110210 PE=4 SV=1
TRINITY_DN766_c0_g2_i2	3309	0	2550.86	0	24.13	0	16.06	14.4248	tr|A0A0K9RSL1|A0A0K9RSL1_SPIOL Uncharacterized protein OS=Spinacia oleracea OX=3562 GN=SOVF_038910 PE=4 SV=1
TRINITY_DN987_c0_g1_i26	2067	0	2526.44	0	39.67	0	26.4	14.4106	tr|A0A0K9QF84|A0A0K9QF84_SPIOL Uncharacterized protein OS=Spinacia oleracea OX=3562 GN=SOVF_191370 PE=3 SV=1
TRINITY_DN1451_c0_g1_i1	3656	0	2371.01	0	20.19	0	13.43	14.3192	tr|A0A0K9RNI2|A0A0K9RNI2_SPIOL Non-specific serine/threonine protein kinase OS=Spinacia oleracea OX=3562 GN=SOVF_046930 PE=3 SV=1
TRINITY_DN2859_c0_g1_i2	2018	0	2359	0	38.03	0	25.31	14.3119	tr|A0A0K9QRY3|A0A0K9QRY3_SPIOL Uncharacterized protein OS=Spinacia oleracea OX=3562 GN=SOVF_155170 PE=4 SV=1
TRINITY_DN1642_c0_g1_i3	1091	0	2221.49	0	72.42	0	48.19	14.225	tr|A0A0B5JNY5|A0A0B5JNY5_9CARY Beta-actin 1 OS=Haloxylon ammodendron OX=151230 PE=2 SV=1
TRINITY_DN2967_c0_g1_i4	3567	0	2084.56	0	18.22	0	12.12	14.1338	tr|A0A0K9RN69|A0A0K9RN69_SPIOL Uncharacterized protein OS=Spinacia oleracea OX=3562 GN=SOVF_047550 PE=3 SV=1
TRINITY_DN12343_c0_g1_i3	5033	0	1903	0	11.6	0	7.72	14.002	tr|A0A0K9R831|A0A0K9R831_SPIOL Uncharacterized protein OS=Spinacia oleracea OX=3562 GN=SOVF_096280 PE=3 SV=1
TRINITY_DN969_c1_g1_i14	5357	0	1821.49	0	10.41	0	6.93	13.9385	tr|A0A0J8B8P2|A0A0J8B8P2_BETVU Uncharacterized protein OS=Beta vulgaris subsp. vulgaris OX=3555 GN=BVRB_5g125260 PE=4 SV=1
TRINITY_DN754_c0_g1_i5	6716	0	1749.51	0	7.92	0	5.27	13.8811	tr|A0A0K9QYY6|A0A0K9QYY6_SPIOL Uncharacterized protein OS=Spinacia oleracea OX=3562 GN=SOVF_125500 PE=3 SV=1
TRINITY_DN6658_c0_g1_i1	356	0	1699	0	289.8	0	192.83	13.8384	-
TRINITY_DN16548_c0_g1_i4	14145	0	1633	0	3.46	0	2.3	13.7813	tr|Q5KSC6|Q5KSC6_BASAL RNA-dependent RNA polymerase (Fragment) OS=Basella alba OX=3589 PE=4 SV=1
TRINITY_DN751_c0_g3_i10	3625	0	1574.81	0	13.53	0	9	13.7291	tr|A0A0K9QNY4|A0A0K9QNY4_SPIOL Uncharacterized protein OS=Spinacia oleracea OX=3562 GN=SOVF_157790 PE=4 SV=1
TRINITY_DN5128_c0_g1_i4	1052	0	1508.26	0	51.38	0	34.19	13.6664	tr|A0A0K9QF81|A0A0K9QF81_SPIOL CASP-like protein OS=Spinacia oleracea OX=3562 GN=SOVF_185150 PE=3 SV=1
TRINITY_DN1104_c0_g1_i7	1521	0	1473.22	0	32.58	0	21.68	13.6325	tr|A0A0K9QF69|A0A0K9QF69_SPIOL Peptidylprolyl isomerase OS=Spinacia oleracea OX=3562 GN=SOVF_192750 PE=4 SV=1
TRINITY_DN20_c0_g2_i1	3000	0	1465.76	0	15.39	0	10.24	13.6257	tr|A0A0K9QIN8|A0A0K9QIN8_SPIOL Uncharacterized protein OS=Spinacia oleracea OX=3562 GN=SOVF_180820 PE=4 SV=1
TRINITY_DN3526_c2_g1_i5	5656	0	1439.19	0	7.78	0	5.17	13.5988	tr|A0A0J8B4I5|A0A0J8B4I5_BETVU Uncharacterized protein OS=Beta vulgaris subsp. vulgaris OX=3555 GN=BVRB_003850 PE=4 SV=1
TRINITY_DN2031_c0_g1_i3	3742	0	1400.17	0	11.64	0	7.74	13.5592	tr|A0A0K9QSZ1|A0A0K9QSZ1_SPIOL Uncharacterized protein OS=Spinacia oleracea OX=3562 GN=SOVF_144870 PE=4 SV=1
TRINITY_DN1202_c0_g1_i2	1233	0	1356.33	0	38.23	0	25.44	13.5131	tr|A0A0K9RRN9|A0A0K9RRN9_SPIOL Uncharacterized protein OS=Spinacia oleracea OX=3562 GN=SOVF_036100 PE=4 SV=1
TRINITY_DN5808_c0_g1_i2	939	0	1354.67	0	53.06	0	35.3	13.5121	-
TRINITY_DN2128_c0_g1_i4	1970	0	1330.87	0	22.03	0	14.66	13.4863	tr|A0A0K9RB96|A0A0K9RB96_SPIOL Uncharacterized protein OS=Spinacia oleracea OX=3562 GN=SOVF_086050 PE=4 SV=1
TRINITY_DN854_c2_g1_i9	3189	0	1313.73	0	12.93	0	8.6	13.4678	tr|E7BQD4|E7BQD4_SILLA Gag-pol polyprotein OS=Silene latifolia OX=37657 PE=4 SV=1
TRINITY_DN6067_c0_g2_i1	2753	0	1244.68	0	14.33	0	9.53	13.3899	-
TRINITY_DN349_c1_g1_i23	6859	0	1239.81	0	5.49	0	3.65	13.3841	tr|A0A0K9R748|A0A0K9R748_SPIOL Uncharacterized protein OS=Spinacia oleracea OX=3562 GN=SOVF_106010 PE=4 SV=1
TRINITY_DN467_c0_g1_i5	2991	0	1214.38	0	12.79	0	8.51	13.3536	tr|A0A0K9RA11|A0A0K9RA11_SPIOL Uncharacterized protein OS=Spinacia oleracea OX=3562 GN=SOVF_094540 PE=4 SV=1
TRINITY_DN645_c0_g1_i1	1506	0	1177.53	0	26.34	0	17.52	13.3101	tr|A0A0K9R4L7|A0A0K9R4L7_SPIOL Uncharacterized protein OS=Spinacia oleracea OX=3562 GN=SOVF_112560 PE=4 SV=1
TRINITY_DN6443_c1_g2_i4	961	0	1171.32	0	44.58	0	29.66	13.3015	tr|A0A0K9RSY1|A0A0K9RSY1_SPIOL Uncharacterized protein OS=Spinacia oleracea OX=3562 GN=SOVF_032470 PE=4 SV=1
TRINITY_DN1631_c0_g1_i3	6650	0	1170.21	0	5.35	0	3.56	13.3003	tr|F4NCG3|F4NCG3_BETVU Uncharacterized protein OS=Beta vulgaris subsp. vulgaris OX=3555 PE=4 SV=1
TRINITY_DN48_c0_g1_i4	2649	0	1167.93	0	14.01	0	9.32	13.2978	tr|A0A0K9RA23|A0A0K9RA23_SPIOL CTP synthase OS=Spinacia oleracea OX=3562 GN=SOVF_094430 PE=3 SV=1
TRINITY_DN3903_c0_g2_i3	3926	0	1153.2	0	9.11	0	6.06	13.2792	tr|A0A0K9S2C6|A0A0K9S2C6_SPIOL Formin-like protein OS=Spinacia oleracea OX=3562 GN=SOVF_001830 PE=3 SV=1
TRINITY_DN3526_c2_g1_i1	5731	0	1134.23	0	6.05	0	4.02	13.2552	tr|A0A0K9QRD2|A0A0K9QRD2_SPIOL Uncharacterized protein OS=Spinacia oleracea OX=3562 GN=SOVF_150440 PE=4 SV=1
TRINITY_DN901_c1_g2_i2	3513	0	1123.79	0	9.98	0	6.64	13.2425	tr|A0A0K9RC45|A0A0K9RC45_SPIOL Uncharacterized protein OS=Spinacia oleracea OX=3562 GN=SOVF_083700 PE=4 SV=1
TRINITY_DN3168_c0_g1_i1	1995	0	1104	0	18.02	0	11.99	13.2166	tr|A0A0K9RHJ2|A0A0K9RHJ2_SPIOL Uncharacterized protein OS=Spinacia oleracea OX=3562 GN=SOVF_072110 PE=4 SV=1
TRINITY_DN1743_c0_g2_i1	1161	0	1099	0	33.26	0	22.13	13.21	tr|A0A0K9QNX7|A0A0K9QNX7_SPIOL Uncharacterized protein OS=Spinacia oleracea OX=3562 GN=SOVF_158120 PE=4 SV=1
TRINITY_DN1982_c1_g1_i19	3656	0	1092.46	0	9.3	0	6.19	13.2008	tr|A0A0K9QK14|A0A0K9QK14_SPIOL Uncharacterized protein (Fragment) OS=Spinacia oleracea OX=3562 GN=SOVF_176610 PE=4 SV=1
TRINITY_DN754_c0_g1_i7	6821	0	1071.97	0	4.78	0	3.18	13.1741	tr|A0A0K9QYY6|A0A0K9QYY6_SPIOL Uncharacterized protein OS=Spinacia oleracea OX=3562 GN=SOVF_125500 PE=3 SV=1
TRINITY_DN7496_c0_g1_i2	1265	0	1027	0	28.09	0	18.69	13.1123	tr|A0A0K9QNA4|A0A0K9QNA4_SPIOL Uncharacterized protein OS=Spinacia oleracea OX=3562 GN=SOVF_165100 PE=3 SV=1
TRINITY_DN7936_c0_g1_i1	1916	0	1012	0	17.28	0	11.5	13.091	tr|A0A0K9RB58|A0A0K9RB58_SPIOL Uncharacterized protein OS=Spinacia oleracea OX=3562 GN=SOVF_086530 PE=4 SV=1
TRINITY_DN491_c0_g1_i2	2071	0	988.19	0	15.48	0	10.3	13.0564	tr|A0A0K9QYR6|A0A0K9QYR6_SPIOL Uncharacterized protein OS=Spinacia oleracea OX=3562 GN=SOVF_126340 PE=3 SV=1
TRINITY_DN720_c0_g1_i4	3597	0	984.68	0	8.53	0	5.68	13.052	tr|A0A0J8E3A6|A0A0J8E3A6_BETVU Uncharacterized protein OS=Beta vulgaris subsp. vulgaris OX=3555 GN=BVRB_5g125940 PE=4 SV=1
TRINITY_DN4068_c0_g1_i3	6294	0	984.25	0	4.76	0	3.17	13.0506	tr|A0A0K9QSV4|A0A0K9QSV4_SPIOL Uncharacterized protein OS=Spinacia oleracea OX=3562 GN=SOVF_145400 PE=4 SV=1
TRINITY_DN600_c0_g1_i3	2251	0	973.66	0	13.93	0	9.27	13.0358	tr|A0A0K9R6H9|A0A0K9R6H9_SPIOL Uncharacterized protein OS=Spinacia oleracea OX=3562 GN=SOVF_101240 PE=4 SV=1
TRINITY_DN1631_c0_g1_i10	6035	0	969.63	0	4.9	0	3.26	13.0299	tr|F4NCG3|F4NCG3_BETVU Uncharacterized protein OS=Beta vulgaris subsp. vulgaris OX=3555 PE=4 SV=1
TRINITY_DN4880_c0_g1_i1	371	0	920	0	144.7	0	96.28	12.9536	-
TRINITY_DN1477_c0_g1_i9	5327	0	899.56	0	5.17	0	3.44	12.9218	tr|A0A0K9QZ91|A0A0K9QZ91_SPIOL Uncharacterized protein OS=Spinacia oleracea OX=3562 GN=SOVF_124700 PE=4 SV=1
TRINITY_DN1631_c0_g1_i4	5839	0	892.16	0	4.66	0	3.1	12.909	tr|F4NCG3|F4NCG3_BETVU Uncharacterized protein OS=Beta vulgaris subsp. vulgaris OX=3555 PE=4 SV=1
TRINITY_DN5965_c0_g1_i3	1048	0	883.46	0	30.24	0	20.12	12.8943	tr|A0A0K9R7D9|A0A0K9R7D9_SPIOL Uncharacterized protein OS=Spinacia oleracea OX=3562 GN=SOVF_102900 PE=4 SV=1
TRINITY_DN3872_c0_g1_i2	2282	0	882.39	0	12.44	0	8.27	12.8927	tr|A0A0K9S0U5|A0A0K9S0U5_SPIOL Uncharacterized protein OS=Spinacia oleracea OX=3562 GN=SOVF_007040 PE=4 SV=1
TRINITY_DN735_c0_g1_i1	1939	0	875.68	0	14.75	0	9.82	12.8829	tr|A0A0K9R3L0|A0A0K9R3L0_SPIOL Uncharacterized protein OS=Spinacia oleracea OX=3562 GN=SOVF_110910 PE=4 SV=1
TRINITY_DN5220_c0_g1_i5	3713	0	865.76	0	7.25	0	4.83	12.8663	tr|A0A0K9RR96|A0A0K9RR96_SPIOL Uncharacterized protein OS=Spinacia oleracea OX=3562 GN=SOVF_038050 PE=4 SV=1
TRINITY_DN3293_c0_g2_i1	2889	0	847.93	0	9.27	0	6.17	12.836	tr|A0A0K9R671|A0A0K9R671_SPIOL Uncharacterized protein OS=Spinacia oleracea OX=3562 GN=SOVF_102260 PE=4 SV=1
TRINITY_DN4105_c2_g1_i9	1248	0	827.74	0	23	0	15.31	12.8016	-
TRINITY_DN3711_c0_g1_i3	1137	0	810.14	0	25.14	0	16.73	12.7699	tr|A0A0K9RWM9|A0A0K9RWM9_SPIOL Uncharacterized protein OS=Spinacia oleracea OX=3562 GN=SOVF_026600 PE=4 SV=1
TRINITY_DN2976_c0_g1_i1	1012	0	804.98	0	28.75	0	19.13	12.7609	tr|A0A0K9QFF9|A0A0K9QFF9_SPIOL Fructose-bisphosphate aldolase OS=Spinacia oleracea OX=3562 GN=SOVF_190580 PE=3 SV=1
TRINITY_DN6639_c0_g1_i6	2024	0.47	794.4	0.01	12.77	0.01	8.49	12.7411	tr|A0A0K9QJM3|A0A0K9QJM3_SPIOL NADPH-protochlorophyllide oxidoreductase OS=Spinacia oleracea OX=3562 GN=SOVF_171730 PE=3 SV=1
TRINITY_DN914_c1_g1_i1	1120	0	792.45	0	25.03	0	16.66	12.7374	tr|A0A0K9R303|A0A0K9R303_SPIOL Uncharacterized protein (Fragment) OS=Spinacia oleracea OX=3562 GN=SOVF_118930 PE=4 SV=1
TRINITY_DN3546_c0_g1_i2	852	0	790.46	0	34.99	0	23.28	12.7338	tr|A0A0K9QG00|A0A0K9QG00_SPIOL Uncharacterized protein OS=Spinacia oleracea OX=3562 GN=SOVF_183330 PE=4 SV=1
TRINITY_DN3838_c0_g1_i4	1831	0	790.41	0	14.19	0	9.44	12.7338	tr|A0A0K9RCI7|A0A0K9RCI7_SPIOL Uncharacterized protein OS=Spinacia oleracea OX=3562 GN=SOVF_088260 PE=4 SV=1
TRINITY_DN54719_c0_g1_i1	1586	0	789	0	16.64	0	11.07	12.732	tr|E7BQD5|E7BQD5_SILLA Gag-pol polyprotein OS=Silene latifolia OX=37657 PE=4 SV=1
TRINITY_DN5172_c0_g2_i5	3257	0	787.37	0	7.58	0	5.04	12.7283	tr|A0A0J8DZV1|A0A0J8DZV1_BETVU Uncharacterized protein OS=Beta vulgaris subsp. vulgaris OX=3555 GN=BVRB_9g225660 PE=4 SV=1
TRINITY_DN13699_c0_g1_i2	1961	0	751.77	0	12.51	0	8.32	12.6627	-
TRINITY_DN3219_c0_g1_i18	8789	0	734.94	0	2.53	0	1.68	12.6297	tr|A0A0K9R0L3|A0A0K9R0L3_SPIOL Uncharacterized protein OS=Spinacia oleracea OX=3562 GN=SOVF_120350 PE=3 SV=1
TRINITY_DN1603_c0_g1_i10	1772	0	709.36	0	13.21	0	8.79	12.5778	-
TRINITY_DN11384_c0_g1_i4	2999	0	708.37	0	7.44	0	4.95	12.5757	tr|A0A0K9QC56|A0A0K9QC56_SPIOL Uncharacterized protein OS=Spinacia oleracea OX=3562 GN=SOVF_195700 PE=4 SV=1
TRINITY_DN5827_c0_g1_i2	1072	0	700.23	0	23.32	0	15.51	12.5593	tr|A0A0K9RQ24|A0A0K9RQ24_SPIOL Uncharacterized protein OS=Spinacia oleracea OX=3562 GN=SOVF_047610 PE=4 SV=1
TRINITY_DN3562_c0_g1_i1	1918	0	698.94	0	11.92	0	7.93	12.5573	tr|A0A0K9RF72|A0A0K9RF72_SPIOL Uncharacterized protein OS=Spinacia oleracea OX=3562 GN=SOVF_078690 PE=4 SV=1
TRINITY_DN6961_c0_g2_i6	2233	0	699.13	0	10.09	0	6.71	12.5573	tr|A0A0K9QR37|A0A0K9QR37_SPIOL Uncharacterized protein OS=Spinacia oleracea OX=3562 GN=SOVF_151380 PE=4 SV=1
TRINITY_DN349_c1_g1_i2	5362	0	694.72	0	3.97	0	2.64	12.549	tr|A0A0K9R748|A0A0K9R748_SPIOL Uncharacterized protein OS=Spinacia oleracea OX=3562 GN=SOVF_106010 PE=4 SV=1
TRINITY_DN14096_c0_g1_i1	1080	0	694	0	22.9	0	15.24	12.5469	tr|A0A0K9QFI0|A0A0K9QFI0_SPIOL Uncharacterized protein OS=Spinacia oleracea OX=3562 GN=SOVF_184910 PE=4 SV=1
TRINITY_DN3453_c1_g1_i2	8030	0	688.97	0	2.6	0	1.73	12.5365	tr|A0A0K9QW75|A0A0K9QW75_SPIOL Uncharacterized protein (Fragment) OS=Spinacia oleracea OX=3562 GN=SOVF_139500 PE=4 SV=1
TRINITY_DN1574_c1_g1_i7	4100	0	687.9	0	5.19	0	3.46	12.5344	tr|A0A0K9S1U1|A0A0K9S1U1_SPIOL Uncharacterized protein OS=Spinacia oleracea OX=3562 GN=SOVF_008850 PE=4 SV=1
TRINITY_DN3364_c0_g2_i4	658	0	688.45	0	42.95	0	28.58	12.5344	tr|A0A0K9RER0|A0A0K9RER0_SPIOL Uncharacterized protein OS=Spinacia oleracea OX=3562 GN=SOVF_026860 PE=3 SV=1
TRINITY_DN3153_c0_g1_i6	4378	0	678.41	0	4.78	0	3.18	12.5133	tr|A0A0K9RPR8|A0A0K9RPR8_SPIOL Uncharacterized protein OS=Spinacia oleracea OX=3562 GN=SOVF_042390 PE=4 SV=1
TRINITY_DN2118_c0_g1_i1	3062	0	674.51	0	6.93	0	4.61	12.5069	tr|A0A0K9R9X2|A0A0K9R9X2_SPIOL Uncharacterized protein OS=Spinacia oleracea OX=3562 GN=SOVF_097260 PE=3 SV=1
TRINITY_DN10393_c0_g1_i18	1107	0	671.92	0	21.53	0	14.32	12.5004	tr|Q711H9|Q711H9_BETVU Soluble pyrophosphatase OS=Beta vulgaris OX=161934 GN=ppa1 PE=2 SV=1
TRINITY_DN1603_c0_g1_i11	2785	0	671.76	0	7.64	0	5.08	12.5004	tr|A0A0K9RB35|A0A0K9RB35_SPIOL Uncharacterized protein OS=Spinacia oleracea OX=3562 GN=SOVF_091100 PE=4 SV=1
TRINITY_DN3565_c0_g2_i1	5261	0	672.41	0	3.92	0	2.61	12.5004	tr|A0A0J8BBT3|A0A0J8BBT3_BETVU Uncharacterized protein OS=Beta vulgaris subsp. vulgaris OX=3555 GN=BVRB_5g126490 PE=4 SV=1
TRINITY_DN4597_c0_g1_i7	7925	0	667.24	0	2.55	0	1.7	12.4897	tr|A0A0K9QI95|A0A0K9QI95_SPIOL Uncharacterized protein OS=Spinacia oleracea OX=3562 GN=SOVF_176140 PE=4 SV=1
TRINITY_DN1158_c1_g2_i7	3991	0	657.24	0	5.1	0	3.4	12.4679	tr|A0A0K9R1F6|A0A0K9R1F6_SPIOL Uncharacterized protein OS=Spinacia oleracea OX=3562 GN=SOVF_117790 PE=3 SV=1
TRINITY_DN3153_c0_g1_i1	4342	0	652.7	0	4.64	0	3.09	12.4591	tr|A0A0K9RPR8|A0A0K9RPR8_SPIOL Uncharacterized protein OS=Spinacia oleracea OX=3562 GN=SOVF_042390 PE=4 SV=1
TRINITY_DN10829_c1_g1_i5	1535	0	648.99	0	14.2	0	9.45	12.4502	tr|A0A0K9RYX7|A0A0K9RYX7_SPIOL Uncharacterized protein OS=Spinacia oleracea OX=3562 GN=SOVF_013510 PE=4 SV=1
TRINITY_DN1339_c1_g1_i2	1633	0	645	0	13.16	0	8.76	12.4413	tr|A0A0K9R0E4|A0A0K9R0E4_SPIOL Uncharacterized protein OS=Spinacia oleracea OX=3562 GN=SOVF_127650 PE=4 SV=1
TRINITY_DN190_c0_g1_i14	3229	0	622.89	0	6.05	0	4.02	12.3912	tr|G5DW29|G5DW29_SILLA Putative calreticulin (Fragment) OS=Silene latifolia OX=37657 PE=2 SV=1
TRINITY_DN720_c0_g1_i1	2370	0	620.95	0	8.4	0	5.59	12.3866	tr|A0A0K9RR63|A0A0K9RR63_SPIOL Uncharacterized protein OS=Spinacia oleracea OX=3562 GN=SOVF_037950 PE=4 SV=1
TRINITY_DN357_c0_g1_i22	6493	0	617.55	0	2.89	0	1.93	12.3796	tr|A0A0K9QZI4|A0A0K9QZI4_SPIOL Uncharacterized protein OS=Spinacia oleracea OX=3562 GN=SOVF_123740 PE=4 SV=1
TRINITY_DN3146_c0_g1_i10	1134	0	616.09	0	19.18	0	12.76	12.3749	tr|A0A1B1RVA0|A0A1B1RVA0_AMATR Transcription factor MYB1 OS=Amaranthus tricolor OX=29722 PE=2 SV=1
TRINITY_DN2824_c0_g1_i10	6424	0	610.36	0	2.89	0	1.92	12.3608	tr|A0A0J8B7A3|A0A0J8B7A3_BETVU Uncharacterized protein OS=Beta vulgaris subsp. vulgaris OX=3555 GN=BVRB_004490 PE=4 SV=1
TRINITY_DN307_c0_g1_i6	2799	0	605.69	0	6.85	0	4.56	12.3513	tr|A0A0K9QKS6|A0A0K9QKS6_SPIOL Uncharacterized protein OS=Spinacia oleracea OX=3562 GN=SOVF_174400 PE=4 SV=1
TRINITY_DN2642_c0_g1_i10	1413	0	599.33	0	14.42	0	9.59	12.3346	tr|A0A0K9RWM6|A0A0K9RWM6_SPIOL Uncharacterized protein OS=Spinacia oleracea OX=3562 GN=SOVF_019600 PE=4 SV=1
TRINITY_DN3478_c0_g2_i2	3465	0	597.72	0	5.39	0	3.58	12.3322	tr|A0A0K9RDF1|A0A0K9RDF1_SPIOL Pyruvate dehydrogenase E1 component subunit beta OS=Spinacia oleracea OX=3562 GN=SOVF_079370 PE=4 SV=1
TRINITY_DN1698_c1_g1_i5	5330	0	596.25	0	3.43	0	2.28	12.3273	tr|A0A0K9R0C2|A0A0K9R0C2_SPIOL Uncharacterized protein OS=Spinacia oleracea OX=3562 GN=SOVF_120870 PE=4 SV=1
TRINITY_DN613_c0_g1_i1	3266	0	575.24	0	5.52	0	3.67	12.2756	tr|A0A0K9QLH8|A0A0K9QLH8_SPIOL Uncharacterized protein OS=Spinacia oleracea OX=3562 GN=SOVF_170700 PE=4 SV=1
TRINITY_DN3386_c0_g2_i3	4140	0	573.13	0	4.28	0	2.85	12.2706	tr|A0A0J8BLL0|A0A0J8BLL0_BETVU Uncharacterized protein OS=Beta vulgaris subsp. vulgaris OX=3555 GN=BVRB_9g206130 PE=3 SV=1
TRINITY_DN4047_c0_g1_i14	9074	0.01	561.2	0	1.87	0	1.24	12.24	tr|A0A0K9QDW0|A0A0K9QDW0_SPIOL Uncharacterized protein OS=Spinacia oleracea OX=3562 GN=SOVF_195620 PE=4 SV=1
TRINITY_DN65437_c0_g1_i1	2075	0	556	0	8.69	0	5.78	12.2271	-
TRINITY_DN616_c0_g2_i5	990	0	555.15	0	20.37	0	13.55	12.2245	tr|A0A0K9RUL9|A0A0K9RUL9_SPIOL Uncharacterized protein OS=Spinacia oleracea OX=3562 GN=SOVF_030910 PE=4 SV=1
TRINITY_DN663_c0_g2_i7	1228	0	553.86	0	15.69	0	10.44	12.2219	-
TRINITY_DN5768_c1_g1_i4	4180	0	552.62	0	4.09	0	2.72	12.2193	-
TRINITY_DN13952_c0_g1_i4	2901	0	550	0	5.99	0	3.98	12.2115	tr|A0A0K9RP95|A0A0K9RP95_SPIOL Uncharacterized protein OS=Spinacia oleracea OX=3562 GN=SOVF_043860 PE=4 SV=1
TRINITY_DN4566_c1_g1_i3	3004	0	544.87	0	5.71	0	3.8	12.1983	tr|A0A0K9Q7S0|A0A0K9Q7S0_SPIOL Uncharacterized protein OS=Spinacia oleracea OX=3562 GN=SOVF_210410 PE=4 SV=1
TRINITY_DN6376_c0_g1_i1	1742	0	544	0	10.32	0	6.87	12.1957	tr|A0A0K9RE61|A0A0K9RE61_SPIOL Uncharacterized protein OS=Spinacia oleracea OX=3562 GN=SOVF_076930 PE=4 SV=1
TRINITY_DN406_c1_g1_i7	2355	0	534.3	0	7.28	0	4.84	12.1689	tr|A0A0K9QXM6|A0A0K9QXM6_SPIOL Uncharacterized protein OS=Spinacia oleracea OX=3562 GN=SOVF_129740 PE=4 SV=1
TRINITY_DN5055_c0_g1_i4	4542	0	533.58	0	3.62	0	2.41	12.1689	tr|A0A0K9QEZ3|A0A0K9QEZ3_SPIOL Uncharacterized protein OS=Spinacia oleracea OX=3562 GN=SOVF_186570 PE=4 SV=1
TRINITY_DN11620_c0_g2_i2	1444	0	526	0	12.34	0	8.21	12.1471	tr|A0A0K9R5U6|A0A0K9R5U6_SPIOL 5-formyltetrahydrofolate cyclo-ligase OS=Spinacia oleracea OX=3562 GN=SOVF_103230 PE=3 SV=1
TRINITY_DN307_c0_g1_i7	3469	0	521.64	0	4.7	0	3.12	12.1361	tr|A0A0K9QKS6|A0A0K9QKS6_SPIOL Uncharacterized protein OS=Spinacia oleracea OX=3562 GN=SOVF_174400 PE=4 SV=1
TRINITY_DN5845_c0_g1_i4	745	0	512.25	0	27	0	17.97	12.1082	tr|A0A0K9RT69|A0A0K9RT69_SPIOL Uncharacterized protein OS=Spinacia oleracea OX=3562 GN=SOVF_032530 PE=4 SV=1
TRINITY_DN4105_c0_g1_i2	4821	0	510.69	0	3.26	0	2.17	12.1054	tr|A0A0K9QFS8|A0A0K9QFS8_SPIOL Uncharacterized protein OS=Spinacia oleracea OX=3562 GN=SOVF_189310 PE=4 SV=1
TRINITY_DN13431_c0_g1_i4	2076	0	509.12	0	7.96	0	5.29	12.0997	tr|A0A0K9RNT7|A0A0K9RNT7_SPIOL Uncharacterized protein OS=Spinacia oleracea OX=3562 GN=SOVF_045740 PE=4 SV=1
TRINITY_DN3429_c2_g1_i2	3659	0	506.08	0	4.31	0	2.87	12.0912	tr|A0A0K9QAS9|A0A0K9QAS9_SPIOL Uncharacterized protein OS=Spinacia oleracea OX=3562 GN=SOVF_205660 PE=4 SV=1
TRINITY_DN7977_c0_g1_i8	1226	0	486.6	0	13.81	0	9.19	12.036	tr|A0A0K9S2A4|A0A0K9S2A4_SPIOL Uncharacterized protein OS=Spinacia oleracea OX=3562 GN=SOVF_002530 PE=4 SV=1
TRINITY_DN194_c0_g1_i7	4832	0.39	475.8	0	3.03	0	2.01	12.0031	tr|A0A0K9RE17|A0A0K9RE17_SPIOL Phospholipid-transporting ATPase OS=Spinacia oleracea OX=3562 GN=SOVF_076110 PE=3 SV=1
TRINITY_DN7959_c0_g1_i7	4055	0	473.71	0	3.62	0	2.41	11.997	-
TRINITY_DN1022_c0_g2_i8	3129	0	472.7	0	4.75	0	3.16	11.9939	tr|A0A0K9QQB6|A0A0K9QQB6_SPIOL Uncharacterized protein OS=Spinacia oleracea OX=3562 GN=SOVF_153540 PE=4 SV=1
TRINITY_DN9338_c0_g1_i9	3305	0	470.36	0	4.46	0	2.96	11.9848	tr|A0A0K9QR37|A0A0K9QR37_SPIOL Uncharacterized protein OS=Spinacia oleracea OX=3562 GN=SOVF_151380 PE=4 SV=1
TRINITY_DN8470_c0_g2_i2	817	0	467	0	21.82	0	14.52	11.9755	tr|A0A0K9RH72|A0A0K9RH72_SPIOL Uncharacterized protein OS=Spinacia oleracea OX=3562 GN=SOVF_066620 PE=4 SV=1
TRINITY_DN5806_c0_g1_i2	3000	0	465.46	0	4.89	0	3.25	11.9693	tr|K4Q0F0|K4Q0F0_BETVU Uncharacterized protein OS=Beta vulgaris OX=161934 PE=4 SV=1
TRINITY_DN9337_c1_g6_i1	1536	0	463.53	0	10.14	0	6.75	11.9662	-
TRINITY_DN5508_c0_g1_i4	2681	0	461.43	0	5.46	0	3.64	11.9569	tr|A0A0K9S0C2|A0A0K9S0C2_SPIOL Uncharacterized protein OS=Spinacia oleracea OX=3562 GN=SOVF_008890 PE=4 SV=1
TRINITY_DN3013_c0_g1_i3	1902	0	457.78	0	7.88	0	5.24	11.9475	tr|A0A0K9QNX0|A0A0K9QNX0_SPIOL Uncharacterized protein OS=Spinacia oleracea OX=3562 GN=SOVF_164050 PE=4 SV=1
TRINITY_DN3565_c0_g2_i7	5904	0	457.27	0	2.36	0	1.57	11.9443	tr|A0A0J8BBT3|A0A0J8BBT3_BETVU Uncharacterized protein OS=Beta vulgaris subsp. vulgaris OX=3555 GN=BVRB_5g126490 PE=4 SV=1
TRINITY_DN6613_c0_g1_i2	3250	0	454.95	0	4.39	0	2.92	11.938	tr|A0A0K9RU01|A0A0K9RU01_SPIOL Uncharacterized protein OS=Spinacia oleracea OX=3562 GN=SOVF_029440 PE=4 SV=1
TRINITY_DN111_c0_g5_i1	1171	0	454.38	0	13.61	0	9.06	11.9348	-
TRINITY_DN3538_c0_g1_i1	1971	0	447.59	0	7.41	0	4.93	11.9156	tr|A0A0K9QRH0|A0A0K9QRH0_SPIOL Uncharacterized protein OS=Spinacia oleracea OX=3562 GN=SOVF_149860 PE=4 SV=1
TRINITY_DN1364_c0_g2_i3	1336	0	447.17	0	11.48	0	7.64	11.9124	tr|A0A0K9RZS7|A0A0K9RZS7_SPIOL Uncharacterized protein OS=Spinacia oleracea OX=3562 GN=SOVF_016110 PE=4 SV=1
TRINITY_DN456_c0_g1_i6	1259	0	445.31	0	12.25	0	8.15	11.9059	-
TRINITY_DN3367_c0_g2_i18	4640	0.05	443.74	0	2.94	0	1.96	11.9027	tr|A0A0K9RM47|A0A0K9RM47_SPIOL Uncharacterized protein OS=Spinacia oleracea OX=3562 GN=SOVF_056950 PE=3 SV=1
TRINITY_DN7674_c0_g1_i16	1948	0	443.75	0	7.44	0	4.95	11.9027	tr|A0A0K9RIL4|A0A0K9RIL4_SPIOL Uncharacterized protein (Fragment) OS=Spinacia oleracea OX=3562 GN=SOVF_067710 PE=3 SV=1
TRINITY_DN2334_c0_g1_i3	2223	0	442.95	0	6.42	0	4.27	11.8994	tr|A0A0K9RKG9|A0A0K9RKG9_SPIOL Uncharacterized protein OS=Spinacia oleracea OX=3562 GN=SOVF_056230 PE=4 SV=1
TRINITY_DN1059_c0_g1_i9	2534	0	440.99	0	5.55	0	3.69	11.8929	tr|A0A0K9RY82|A0A0K9RY82_SPIOL Uncharacterized protein OS=Spinacia oleracea OX=3562 GN=SOVF_021870 PE=4 SV=1
TRINITY_DN2368_c0_g1_i1	498	0	434.07	0	40.88	0	27.2	11.8698	tr|A0A0K9R4J7|A0A0K9R4J7_SPIOL Uncharacterized protein OS=Spinacia oleracea OX=3562 GN=SOVF_114200 PE=4 SV=1
TRINITY_DN3424_c0_g1_i3	2007	0	432.38	0	7.01	0	4.67	11.8632	tr|A0A0K9QIR2|A0A0K9QIR2_SPIOL Uncharacterized protein OS=Spinacia oleracea OX=3562 GN=SOVF_174710 PE=4 SV=1
TRINITY_DN4300_c0_g1_i2	1663	0	430.14	0	8.6	0	5.72	11.8565	tr|A0A0K9R5S7|A0A0K9R5S7_SPIOL Uncharacterized protein OS=Spinacia oleracea OX=3562 GN=SOVF_103390 PE=4 SV=1
TRINITY_DN3386_c0_g1_i1	844	0	427.88	0	19.17	0	12.76	11.8497	-
TRINITY_DN806_c0_g1_i2	3048	0	426.87	0	4.41	0	2.93	11.8464	tr|A0A0C5AZ91|A0A0C5AZ91_9CARY Acyl carrier protein OS=Suaeda glauca OX=397272 PE=2 SV=1
TRINITY_DN1586_c1_g1_i2	1472	0	423.09	0	9.71	0	6.46	11.8328	tr|A0A0K9RZC0|A0A0K9RZC0_SPIOL Uncharacterized protein OS=Spinacia oleracea OX=3562 GN=SOVF_012220 PE=4 SV=1
TRINITY_DN1236_c0_g1_i25	2109	0	421.99	0	6.48	0	4.31	11.8294	tr|A0A0K9RRH1|A0A0K9RRH1_SPIOL Uncharacterized protein OS=Spinacia oleracea OX=3562 GN=SOVF_037240 PE=4 SV=1
TRINITY_DN9317_c0_g2_i1	1874	0	422.16	0	7.39	0	4.91	11.8294	tr|E7BQD4|E7BQD4_SILLA Gag-pol polyprotein OS=Silene latifolia OX=37657 PE=4 SV=1
TRINITY_DN1918_c2_g1_i3	1538	0	420.56	0	9.18	0	6.11	11.826	tr|A0A0K9QSV9|A0A0K9QSV9_SPIOL Uncharacterized protein OS=Spinacia oleracea OX=3562 GN=SOVF_145290 PE=4 SV=1
TRINITY_DN6206_c0_g1_i12	1821	0	421.13	0	7.61	0	5.06	11.826	tr|A0A0K9S0M3|A0A0K9S0M3_SPIOL Uncharacterized protein OS=Spinacia oleracea OX=3562 GN=SOVF_013460 PE=4 SV=1
TRINITY_DN4719_c0_g1_i5	3120	0	410.59	0	4.13	0	2.75	11.7913	tr|A0A0K9RZ70|A0A0K9RZ70_SPIOL Exocyst subunit Exo70 family protein OS=Spinacia oleracea OX=3562 GN=SOVF_012200 PE=3 SV=1
TRINITY_DN10622_c1_g2_i3	2751	0	409.69	0	4.72	0	3.14	11.7878	tr|A0A0K9RTB3|A0A0K9RTB3_SPIOL Uncharacterized protein OS=Spinacia oleracea OX=3562 GN=SOVF_031230 PE=4 SV=1
TRINITY_DN461_c1_g1_i5	2839	0	404.67	0	4.51	0	3	11.7701	tr|A0A0K9QLI3|A0A0K9QLI3_SPIOL Uncharacterized protein OS=Spinacia oleracea OX=3562 GN=SOVF_165590 PE=4 SV=1
TRINITY_DN91802_c0_g1_i1	1432	0	403	0	9.55	0	6.35	11.7629	tr|A0A0K9RDK6|A0A0K9RDK6_SPIOL Uncharacterized protein OS=Spinacia oleracea OX=3562 GN=SOVF_081860 PE=4 SV=1
TRINITY_DN2118_c0_g1_i5	3859	0	397.79	0	3.2	0	2.13	11.7449	tr|A0A0K9R9X2|A0A0K9R9X2_SPIOL Uncharacterized protein OS=Spinacia oleracea OX=3562 GN=SOVF_097260 PE=3 SV=1
TRINITY_DN2894_c0_g1_i2	2380	0	394.44	0	5.31	0	3.53	11.7304	-
TRINITY_DN721_c0_g1_i20	1421	0.04	393.13	0	9.4	0	6.25	11.7267	tr|A0A0K9RI38|A0A0K9RI38_SPIOL Uncharacterized protein OS=Spinacia oleracea OX=3562 GN=SOVF_064090 PE=4 SV=1
TRINITY_DN467_c0_g1_i20	3072	0	386.44	0	3.96	0	2.63	11.7008	tr|A0A0K9RA11|A0A0K9RA11_SPIOL Uncharacterized protein OS=Spinacia oleracea OX=3562 GN=SOVF_094540 PE=4 SV=1
TRINITY_DN3203_c1_g1_i4	1258	0	383.91	0	10.57	0	7.03	11.6933	tr|A0A0K9S1N3|A0A0K9S1N3_SPIOL Uncharacterized protein OS=Spinacia oleracea OX=3562 GN=SOVF_009950 PE=4 SV=1
TRINITY_DN885_c0_g1_i6	3844	0	384.24	0	3.1	0	2.07	11.6933	tr|A0A0K9RWP1|A0A0K9RWP1_SPIOL Uncharacterized protein OS=Spinacia oleracea OX=3562 GN=SOVF_020970 PE=4 SV=1
TRINITY_DN3891_c3_g1_i8	4008	0	381.44	0	2.95	0	1.96	11.682	tr|A0A0K9R396|A0A0K9R396_SPIOL Uncharacterized protein OS=Spinacia oleracea OX=3562 GN=SOVF_111630 PE=4 SV=1
TRINITY_DN3252_c0_g2_i2	4022	0	379.44	0	2.92	0	1.94	11.6744	tr|F4NCG1|F4NCG1_BETVU Uncharacterized protein OS=Beta vulgaris subsp. vulgaris OX=3555 PE=4 SV=1
TRINITY_DN8195_c1_g3_i1	1870	0	373.15	0	6.54	0	4.35	11.6514	tr|A0A0K9Q778|A0A0K9Q778_SPIOL Uncharacterized protein OS=Spinacia oleracea OX=3562 GN=SOVF_213010 PE=4 SV=1
TRINITY_DN975_c0_g1_i2	1365	0	373	0	9.34	0	6.21	11.6514	tr|A0A0K9REJ5|A0A0K9REJ5_SPIOL Uncharacterized protein OS=Spinacia oleracea OX=3562 GN=SOVF_075860 PE=4 SV=1
TRINITY_DN3777_c0_g1_i7	5287	0	370.65	0	2.15	0	1.43	11.6436	tr|A0A0K9QR35|A0A0K9QR35_SPIOL Uncharacterized protein OS=Spinacia oleracea OX=3562 GN=SOVF_150600 PE=4 SV=1
TRINITY_DN1718_c0_g1_i1	2288	0	369.23	0	5.19	0	3.45	11.6358	tr|A0A0J8B3X6|A0A0J8B3X6_BETVU Uncharacterized protein OS=Beta vulgaris subsp. vulgaris OX=3555 GN=BVRB_003990 PE=3 SV=1
TRINITY_DN357_c0_g1_i15	6331	0	368.51	0	1.77	0	1.18	11.6358	tr|A0A0K9QZI4|A0A0K9QZI4_SPIOL Uncharacterized protein OS=Spinacia oleracea OX=3562 GN=SOVF_123740 PE=4 SV=1
TRINITY_DN3057_c0_g1_i3	3423	0	359.23	0	3.28	0	2.18	11.5962	tr|A0A0K9RP36|A0A0K9RP36_SPIOL Uncharacterized protein OS=Spinacia oleracea OX=3562 GN=SOVF_050460 PE=4 SV=1
TRINITY_DN1631_c0_g1_i9	3134	0	358.32	0	3.59	0	2.39	11.5922	tr|F4NCG3|F4NCG3_BETVU Uncharacterized protein OS=Beta vulgaris subsp. vulgaris OX=3555 PE=4 SV=1
TRINITY_DN4681_c0_g1_i2	665	0	356.95	0	21.95	0	14.6	11.5881	tr|A0A0K9RPW6|A0A0K9RPW6_SPIOL Uncharacterized protein OS=Spinacia oleracea OX=3562 GN=SOVF_041950 PE=4 SV=1
TRINITY_DN6257_c1_g2_i3	1945	0	355.66	0	5.97	0	3.97	11.5841	tr|A0A0K9R0R7|A0A0K9R0R7_SPIOL Protein DETOXIFICATION OS=Spinacia oleracea OX=3562 GN=SOVF_126240 PE=3 SV=1
TRINITY_DN12091_c0_g2_i9	3541	0	355.46	0	3.13	0	2.08	11.58	tr|A0A0J8B9U9|A0A0J8B9U9_BETVU Uncharacterized protein OS=Beta vulgaris subsp. vulgaris OX=3555 GN=BVRB_8g201000 PE=4 SV=1
TRINITY_DN6208_c0_g4_i1	985	0	352.95	0	13.03	0	8.67	11.5719	tr|A0A0K9QGW1|A0A0K9QGW1_SPIOL Uncharacterized protein OS=Spinacia oleracea OX=3562 GN=SOVF_180810 PE=4 SV=1
TRINITY_DN519_c1_g1_i2	3239	0	352.45	0	3.41	0	2.27	11.5678	tr|A0A0K9RDY2|A0A0K9RDY2_SPIOL Uncharacterized protein OS=Spinacia oleracea OX=3562 GN=SOVF_083460 PE=4 SV=1
TRINITY_DN569_c0_g1_i20	3798	0	347.87	0	2.85	0	1.89	11.5513	tr|A0A0K9RMJ7|A0A0K9RMJ7_SPIOL Uncharacterized protein OS=Spinacia oleracea OX=3562 GN=SOVF_055650 PE=4 SV=1
TRINITY_DN1817_c0_g1_i7	4134	0	344.72	0	2.58	0	1.72	11.5388	tr|A0A0K9S059|A0A0K9S059_SPIOL Uncharacterized protein OS=Spinacia oleracea OX=3562 GN=SOVF_009340 PE=4 SV=1
TRINITY_DN3528_c2_g1_i4	6818	0	342.29	0	1.53	0	1.02	11.5262	tr|J3SIC4|J3SIC4_BETVU ATP-dependent DNA helicase OS=Beta vulgaris subsp. vulgaris OX=3555 PE=3 SV=1
TRINITY_DN1962_c1_g1_i5	1958	0	332.26	0	5.54	0	3.68	11.4834	tr|A0A0K9RCS5|A0A0K9RCS5_SPIOL Uncharacterized protein OS=Spinacia oleracea OX=3562 GN=SOVF_085970 PE=4 SV=1
TRINITY_DN111_c0_g3_i2	1052	17.87	44763.7	0.59	1524.96	0.41	1014.68	11.4777	-
TRINITY_DN3710_c0_g1_i1	2300	0	322.49	0	4.51	0	3	11.4393	tr|A0A0K9QL29|A0A0K9QL29_SPIOL Uncharacterized protein OS=Spinacia oleracea OX=3562 GN=SOVF_173360 PE=4 SV=1
TRINITY_DN3386_c0_g1_i2	910	0	318.94	0	12.99	0	8.64	11.4258	-
TRINITY_DN4376_c0_g2_i6	1413	0	308.78	0	7.43	0	4.94	11.3799	tr|A0A0K9RZI9|A0A0K9RZI9_SPIOL Uncharacterized protein OS=Spinacia oleracea OX=3562 GN=SOVF_011550 PE=4 SV=1
TRINITY_DN4844_c0_g1_i4	2390	0.01	309.38	0	4.15	0	2.76	11.3799	tr|Q84KS9|Q84KS9_9CARY RelA homolog OS=Suaeda japonica OX=90346 GN=relA PE=2 SV=1
TRINITY_DN3205_c0_g2_i7	1568	0	304.32	0	6.5	0	4.33	11.3564	tr|A0A0K9RUZ2|A0A0K9RUZ2_SPIOL COBRA-like protein OS=Spinacia oleracea OX=3562 GN=SOVF_025610 PE=3 SV=1
TRINITY_DN3957_c1_g1_i15	4032	0	303.56	0	2.33	0	1.55	11.3564	tr|A0A0K9QSJ7|A0A0K9QSJ7_SPIOL Uncharacterized protein OS=Spinacia oleracea OX=3562 GN=SOVF_146580 PE=4 SV=1
TRINITY_DN285_c0_g2_i8	6374	0	301.61	0	1.44	0	0.96	11.3468	tr|A0A0K9QB02|A0A0K9QB02_SPIOL Uncharacterized protein OS=Spinacia oleracea OX=3562 GN=SOVF_199510 PE=4 SV=1
TRINITY_DN13809_c0_g4_i1	549	0	300	0	24.31	0	16.17	11.3373	-
TRINITY_DN4009_c0_g1_i1	2041	0	300.06	0	4.78	0	3.18	11.3373	tr|A0A0K9QHJ2|A0A0K9QHJ2_SPIOL Uncharacterized protein OS=Spinacia oleracea OX=3562 GN=SOVF_184490 PE=4 SV=1
TRINITY_DN4672_c0_g1_i1	3554	0	296.36	0	2.6	0	1.73	11.3179	tr|G9FIF2|G9FIF2_BETVU Uncharacterized protein OS=Beta vulgaris OX=161934 PE=4 SV=1
TRINITY_DN1690_c1_g1_i2	5693	0	292.99	0	1.57	0	1.05	11.3032	tr|A0A0K9S2J6|A0A0K9S2J6_SPIOL Uncharacterized protein OS=Spinacia oleracea OX=3562 GN=SOVF_007360 PE=4 SV=1
TRINITY_DN3478_c0_g2_i9	5390	0	289.8	0	1.65	0	1.1	11.2884	tr|A0A0K9RDF1|A0A0K9RDF1_SPIOL Pyruvate dehydrogenase E1 component subunit beta OS=Spinacia oleracea OX=3562 GN=SOVF_079370 PE=4 SV=1
TRINITY_DN5261_c0_g1_i6	2381	0	289.29	0	3.89	0	2.59	11.2834	tr|A0A0K9S1G8|A0A0K9S1G8_SPIOL Uncharacterized protein OS=Spinacia oleracea OX=3562 GN=SOVF_005580 PE=4 SV=1
TRINITY_DN6835_c0_g1_i2	923	0	288.61	0	11.55	0	7.68	11.2834	tr|A0A0K9QJF7|A0A0K9QJF7_SPIOL Uncharacterized protein OS=Spinacia oleracea OX=3562 GN=SOVF_177420 PE=3 SV=1
TRINITY_DN905_c1_g1_i5	1967	0	289.09	0	4.79	0	3.19	11.2834	tr|A0A0K9RQX0|A0A0K9RQX0_SPIOL Uncharacterized protein OS=Spinacia oleracea OX=3562 GN=SOVF_044900 PE=4 SV=1
TRINITY_DN1011_c0_g1_i5	1846	0	288.19	0	5.13	0	3.41	11.2784	tr|A0A0K9QT10|A0A0K9QT10_SPIOL Uncharacterized protein OS=Spinacia oleracea OX=3562 GN=SOVF_144390 PE=3 SV=1
TRINITY_DN5424_c0_g1_i13	1813	0	288.48	0	5.24	0	3.48	11.2784	tr|A0A0K9QBC8|A0A0K9QBC8_SPIOL Uncharacterized protein (Fragment) OS=Spinacia oleracea OX=3562 GN=SOVF_203750 PE=4 SV=1
TRINITY_DN4011_c0_g1_i5	5037	0	285.81	0	1.74	0	1.16	11.2683	tr|A0A0K9REM2|A0A0K9REM2_SPIOL Uncharacterized protein OS=Spinacia oleracea OX=3562 GN=SOVF_075350 PE=4 SV=1
TRINITY_DN641_c0_g1_i5	3747	0.02	284.34	0	2.36	0	1.57	11.2582	tr|A0A0K9R3K7|A0A0K9R3K7_SPIOL Uncharacterized protein OS=Spinacia oleracea OX=3562 GN=SOVF_110860 PE=4 SV=1
TRINITY_DN2633_c0_g1_i6	4001	0	281.65	0	2.18	0	1.45	11.248	tr|A0A0K9QZ46|A0A0K9QZ46_SPIOL Uncharacterized protein OS=Spinacia oleracea OX=3562 GN=SOVF_125100 PE=4 SV=1
TRINITY_DN3936_c0_g1_i7	4866	0	279.63	0	1.77	0	1.17	11.2378	tr|A0A0K9RYH2|A0A0K9RYH2_SPIOL Acyl-coenzyme A oxidase OS=Spinacia oleracea OX=3562 GN=SOVF_014550 PE=3 SV=1
TRINITY_DN5259_c0_g1_i3	1869	0	279.73	0	4.91	0	3.27	11.2378	tr|A0A0K9R219|A0A0K9R219_SPIOL Uncharacterized protein OS=Spinacia oleracea OX=3562 GN=SOVF_122030 PE=4 SV=1
TRINITY_DN3889_c0_g4_i3	1694	0	279.17	0	5.47	0	3.64	11.2326	tr|E7BQD4|E7BQD4_SILLA Gag-pol polyprotein OS=Silene latifolia OX=37657 PE=4 SV=1
TRINITY_DN4188_c0_g1_i2	1888	0	277.63	0	4.82	0	3.21	11.2274	-
TRINITY_DN987_c0_g1_i19	3797	0	276.74	0	2.26	0	1.51	11.2222	tr|A0A0K9QF84|A0A0K9QF84_SPIOL Uncharacterized protein OS=Spinacia oleracea OX=3562 GN=SOVF_191370 PE=3 SV=1
TRINITY_DN101_c0_g1_i10	3974	0	274.6	0	2.14	0	1.43	11.2118	tr|A0A0K9R319|A0A0K9R319_SPIOL Uncharacterized protein (Fragment) OS=Spinacia oleracea OX=3562 GN=SOVF_119030 PE=4 SV=1
TRINITY_DN1022_c0_g2_i4	3589	0	272.54	0	2.37	0	1.57	11.2013	tr|A0A0K9QQB6|A0A0K9QQB6_SPIOL Uncharacterized protein OS=Spinacia oleracea OX=3562 GN=SOVF_153540 PE=4 SV=1
TRINITY_DN5713_c0_g1_i4	1254	0	267.66	0	7.4	0	4.92	11.1746	tr|A0A0K9RJT9|A0A0K9RJT9_SPIOL Uncharacterized protein OS=Spinacia oleracea OX=3562 GN=SOVF_064680 PE=4 SV=1
TRINITY_DN2128_c0_g1_i3	2019	0	266.34	0	4.29	0	2.86	11.1638	tr|A0A0K9RB96|A0A0K9RB96_SPIOL Uncharacterized protein OS=Spinacia oleracea OX=3562 GN=SOVF_086050 PE=4 SV=1
TRINITY_DN7461_c0_g1_i4	1017	0	265.91	0	9.44	0	6.28	11.1638	tr|A0A0K9RZY7|A0A0K9RZY7_SPIOL Reticulon-like protein OS=Spinacia oleracea OX=3562 GN=SOVF_014800 PE=4 SV=1
TRINITY_DN557_c0_g1_i8	1739	0	264.76	0	5.03	0	3.35	11.1584	tr|A0A0K9S0E6|A0A0K9S0E6_SPIOL Uncharacterized protein OS=Spinacia oleracea OX=3562 GN=SOVF_008470 PE=4 SV=1
TRINITY_DN8989_c1_g1_i4	2993	0	264.66	0	2.79	0	1.85	11.1584	tr|A0A0K9QKY7|A0A0K9QKY7_SPIOL Uncharacterized protein OS=Spinacia oleracea OX=3562 GN=SOVF_172750 PE=4 SV=1
TRINITY_DN2323_c0_g1_i5	5737	0.02	263.52	0	1.4	0	0.93	11.1529	tr|A0A0K9RS20|A0A0K9RS20_SPIOL Uncharacterized protein OS=Spinacia oleracea OX=3562 GN=SOVF_040280 PE=4 SV=1
TRINITY_DN389_c0_g1_i8	3558	0	262.22	0	2.3	0	1.53	11.1419	tr|A0A0J8BFC7|A0A0J8BFC7_BETVU Uncharacterized protein OS=Beta vulgaris subsp. vulgaris OX=3555 GN=BVRB_019340 PE=4 SV=1
TRINITY_DN1264_c0_g1_i3	2682	0	260.87	0	3.09	0	2.05	11.1364	tr|A0A0K9QR83|A0A0K9QR83_SPIOL Uncharacterized protein OS=Spinacia oleracea OX=3562 GN=SOVF_150330 PE=4 SV=1
TRINITY_DN3398_c0_g2_i1	1312	0	260.78	0	6.84	0	4.55	11.1364	tr|A0A0K9QIE5|A0A0K9QIE5_SPIOL Uncharacterized protein OS=Spinacia oleracea OX=3562 GN=SOVF_175780 PE=4 SV=1
TRINITY_DN7256_c0_g4_i1	937	0	260.78	0	10.24	0	6.81	11.1364	tr|E7BQD5|E7BQD5_SILLA Gag-pol polyprotein OS=Silene latifolia OX=37657 PE=4 SV=1
TRINITY_DN5172_c0_g2_i8	3348	0	259.69	0	2.43	0	1.61	11.1309	tr|A0A0J8DZV1|A0A0J8DZV1_BETVU Uncharacterized protein OS=Beta vulgaris subsp. vulgaris OX=3555 GN=BVRB_9g225660 PE=4 SV=1
TRINITY_DN1000_c0_g1_i5	6251	0	257.7	0	1.26	0	0.84	11.1198	tr|A0A0K9RBD5|A0A0K9RBD5_SPIOL Uncharacterized protein OS=Spinacia oleracea OX=3562 GN=SOVF_085770 PE=4 SV=1
TRINITY_DN2557_c0_g1_i2	1908	0	258.08	0	4.43	0	2.95	11.1198	tr|J3S7K7|J3S7K7_BETVU Mariner transposase OS=Beta vulgaris subsp. vulgaris OX=3555 PE=4 SV=1
TRINITY_DN414_c0_g1_i15	3622	0	256.15	0	2.2	0	1.47	11.1085	tr|A0A0K9RTB1|A0A0K9RTB1_SPIOL Uncharacterized protein OS=Spinacia oleracea OX=3562 GN=SOVF_032050 PE=4 SV=1
TRINITY_DN1017_c0_g1_i14	5509	0	255.46	0	1.42	0	0.94	11.1029	tr|A0A0K9S1I1|A0A0K9S1I1_SPIOL Uncharacterized protein OS=Spinacia oleracea OX=3562 GN=SOVF_010610 PE=4 SV=1
TRINITY_DN2907_c1_g2_i2	2297	0	254.71	0	3.56	0	2.37	11.1029	tr|A0A0K9RD31|A0A0K9RD31_SPIOL Uncharacterized protein OS=Spinacia oleracea OX=3562 GN=SOVF_079900 PE=4 SV=1
TRINITY_DN4728_c0_g1_i9	4725	0	255.23	0	1.66	0	1.11	11.1029	tr|A0A0K9RF81|A0A0K9RF81_SPIOL Uncharacterized protein OS=Spinacia oleracea OX=3562 GN=SOVF_077780 PE=3 SV=1
TRINITY_DN2707_c0_g1_i3	2317	2.69	5855.32	0.04	81.17	0.02	54.01	11.0757	sp|P02398|RK12_SPIOL 50S ribosomal protein L12, chloroplastic OS=Spinacia oleracea OX=3562 GN=RPL12 PE=1 SV=2
TRINITY_DN5172_c0_g2_i7	3413	0	249.02	0	2.28	0	1.52	11.0686	tr|A0A0J8DZV1|A0A0J8DZV1_BETVU Uncharacterized protein OS=Beta vulgaris subsp. vulgaris OX=3555 GN=BVRB_9g225660 PE=4 SV=1
TRINITY_DN6078_c0_g1_i1	1833	0	247.79	0	4.44	0	2.96	11.0628	tr|A0A0J8CQE9|A0A0J8CQE9_BETVU Uncharacterized protein OS=Beta vulgaris subsp. vulgaris OX=3555 GN=BVRB_4g076040 PE=4 SV=1
TRINITY_DN699_c0_g2_i12	3187	0	246.37	0	2.43	0	1.61	11.0511	tr|A0A0K9QCJ7|A0A0K9QCJ7_SPIOL Uncharacterized protein OS=Spinacia oleracea OX=3562 GN=SOVF_200030 PE=3 SV=1
TRINITY_DN7000_c0_g1_i1	928	0	245.68	0	9.76	0	6.5	11.0511	tr|A0A0K9RFI2|A0A0K9RFI2_SPIOL Uncharacterized protein (Fragment) OS=Spinacia oleracea OX=3562 GN=SOVF_072650 PE=4 SV=1
TRINITY_DN349_c1_g1_i8	6331	0.13	245.22	0	1.18	0	0.78	11.0452	tr|A0A0K9R748|A0A0K9R748_SPIOL Uncharacterized protein OS=Spinacia oleracea OX=3562 GN=SOVF_106010 PE=4 SV=1
TRINITY_DN2270_c0_g1_i2	2975	0	242.62	0	2.57	0	1.71	11.0334	tr|A0A0K9Q8N2|A0A0K9Q8N2_SPIOL V-type proton ATPase subunit G OS=Spinacia oleracea OX=3562 GN=SOVF_207450 PE=3 SV=1
TRINITY_DN2950_c0_g2_i3	4616	0.01	242.15	0	1.62	0	1.07	11.0274	tr|A0A0K9QK45|A0A0K9QK45_SPIOL Uncharacterized protein OS=Spinacia oleracea OX=3562 GN=SOVF_170350 PE=4 SV=1
TRINITY_DN530_c0_g1_i12	2950	0	241.91	0	2.59	0	1.72	11.0274	sp|Q9M4Y3|RR10_MESCR 30S ribosomal protein S10, chloroplastic OS=Mesembryanthemum crystallinum OX=3544 GN=RPS10 PE=2 SV=1
TRINITY_DN11771_c0_g2_i1	1245	0	239.55	0	6.68	0	4.44	11.0155	tr|A0A0K9QGI6|A0A0K9QGI6_SPIOL Uncharacterized protein OS=Spinacia oleracea OX=3562 GN=SOVF_188160 PE=4 SV=1
TRINITY_DN3406_c0_g1_i4	2015	0	240.42	0	3.88	0	2.58	11.0155	tr|A0A0K9QII3|A0A0K9QII3_SPIOL Starch synthase, chloroplastic/amyloplastic OS=Spinacia oleracea OX=3562 GN=SOVF_175410 PE=3 SV=1
TRINITY_DN4338_c0_g1_i10	2363	0	240.14	0	3.26	0	2.17	11.0155	tr|A0A0J8BD38|A0A0J8BD38_BETVU Nuclear/nucleolar GTPase 2 OS=Beta vulgaris subsp. vulgaris OX=3555 GN=BVRB_4g097000 PE=3 SV=1
TRINITY_DN3443_c0_g1_i6	1103	0	239.12	0	7.69	0	5.12	11.0094	-
TRINITY_DN3891_c3_g1_i3	3078	0	239.35	0	2.45	0	1.63	11.0094	tr|A0A0K9R396|A0A0K9R396_SPIOL Uncharacterized protein OS=Spinacia oleracea OX=3562 GN=SOVF_111630 PE=4 SV=1
TRINITY_DN15460_c0_g1_i2	3146	0	238.36	0	2.38	0	1.58	11.0034	tr|A0A0J8BDV9|A0A0J8BDV9_BETVU Uncharacterized protein OS=Beta vulgaris subsp. vulgaris OX=3555 GN=BVRB_1g023180 PE=4 SV=1
TRINITY_DN2010_c0_g2_i7	2579	0	237.67	0	2.93	0	1.95	11.0034	tr|A0A0K9R5T3|A0A0K9R5T3_SPIOL Uncharacterized protein OS=Spinacia oleracea OX=3562 GN=SOVF_103330 PE=4 SV=1
TRINITY_DN4521_c0_g1_i13	11467	0	236.85	0	0.62	0	0.41	10.9973	tr|A0A0K9RIZ0|A0A0K9RIZ0_SPIOL Uncharacterized protein OS=Spinacia oleracea OX=3562 GN=SOVF_061310 PE=4 SV=1
TRINITY_DN5993_c0_g2_i2	1109	0	236.17	0	7.55	0	5.02	10.9912	tr|A0A0K9RAQ4|A0A0K9RAQ4_SPIOL Uncharacterized protein OS=Spinacia oleracea OX=3562 GN=SOVF_087620 PE=4 SV=1
TRINITY_DN978_c0_g1_i3	2534	0	236.39	0	2.97	0	1.98	10.9912	tr|A0A0K9RPU0|A0A0K9RPU0_SPIOL Uncharacterized protein OS=Spinacia oleracea OX=3562 GN=SOVF_042210 PE=4 SV=1
TRINITY_DN4330_c0_g1_i1	2856	0	234.63	0	2.6	0	1.73	10.9851	tr|A0A0K9QQN3|A0A0K9QQN3_SPIOL Uncharacterized protein OS=Spinacia oleracea OX=3562 GN=SOVF_152410 PE=4 SV=1
TRINITY_DN699_c0_g2_i14	1841	0	233.67	0	4.17	0	2.77	10.979	tr|A0A0K9QX36|A0A0K9QX36_SPIOL Uncharacterized protein (Fragment) OS=Spinacia oleracea OX=3562 GN=SOVF_136840 PE=3 SV=1
TRINITY_DN6385_c0_g1_i1	640	0	233.45	0	15.14	0	10.07	10.9728	tr|A0A0K9RYD0|A0A0K9RYD0_SPIOL Uncharacterized protein OS=Spinacia oleracea OX=3562 GN=SOVF_019630 PE=4 SV=1
TRINITY_DN237_c0_g1_i22	3888	0	231.65	0	1.85	0	1.23	10.9666	tr|A0A0J8B2X2|A0A0J8B2X2_BETVU Uncharacterized protein OS=Beta vulgaris subsp. vulgaris OX=3555 GN=BVRB_009240 PE=4 SV=1
TRINITY_DN4719_c0_g1_i6	3286	0	231.23	0	2.2	0	1.47	10.9604	tr|A0A0K9RZ70|A0A0K9RZ70_SPIOL Exocyst subunit Exo70 family protein OS=Spinacia oleracea OX=3562 GN=SOVF_012200 PE=3 SV=1
TRINITY_DN1375_c1_g1_i4	2527	0	227.76	0	2.87	0	1.91	10.9415	tr|A0A0K9RJP8|A0A0K9RJP8_SPIOL Uncharacterized protein OS=Spinacia oleracea OX=3562 GN=SOVF_058950 PE=4 SV=1
TRINITY_DN8916_c0_g2_i2	1385	0	228.12	0	5.62	0	3.74	10.9415	tr|A0A0U1YJM3|A0A0U1YJM3_AMACR DODA1 OS=Amaranthus cruentus OX=117272 PE=2 SV=1
TRINITY_DN1675_c0_g1_i16	2124	0	226.3	0	3.45	0	2.29	10.9288	tr|A0A0K9RU18|A0A0K9RU18_SPIOL Uncharacterized protein OS=Spinacia oleracea OX=3562 GN=SOVF_028510 PE=4 SV=1
TRINITY_DN1157_c1_g1_i8	1625	0.03	223.09	0	4.58	0	3.05	10.9095	tr|A0A0K9RI90|A0A0K9RI90_SPIOL Uncharacterized protein OS=Spinacia oleracea OX=3562 GN=SOVF_069020 PE=4 SV=1
TRINITY_DN982_c0_g1_i3	2902	0	223.18	0	2.43	0	1.62	10.9095	tr|A0A0K9QZU7|A0A0K9QZU7_SPIOL Hexosyltransferase OS=Spinacia oleracea OX=3562 GN=SOVF_122730 PE=3 SV=1
TRINITY_DN1017_c0_g1_i7	5437	0	222.4	0	1.25	0	0.83	10.9031	tr|A0A0K9S1I1|A0A0K9S1I1_SPIOL Uncharacterized protein OS=Spinacia oleracea OX=3562 GN=SOVF_010610 PE=4 SV=1
TRINITY_DN250_c0_g1_i3	3704	0	221.83	0	1.86	0	1.24	10.9031	tr|A0A0K9QR13|A0A0K9QR13_SPIOL Uncharacterized protein OS=Spinacia oleracea OX=3562 GN=SOVF_157820 PE=4 SV=1
TRINITY_DN4764_c0_g2_i3	4636	0	222.42	0	1.48	0	0.98	10.9031	tr|A0A0K9RQZ1|A0A0K9RQZ1_SPIOL Uncharacterized protein OS=Spinacia oleracea OX=3562 GN=SOVF_043950 PE=4 SV=1
TRINITY_DN3528_c2_g1_i1	7048	0	220.22	0	0.95	0	0.63	10.89	tr|J3SIC4|J3SIC4_BETVU ATP-dependent DNA helicase OS=Beta vulgaris subsp. vulgaris OX=3555 PE=3 SV=1
TRINITY_DN2479_c0_g2_i1	976	0	218	0	8.14	0	5.42	10.8768	-
TRINITY_DN3528_c2_g1_i14	6794	0	214.68	0	0.96	0	0.64	10.8569	tr|J3SIC4|J3SIC4_BETVU ATP-dependent DNA helicase OS=Beta vulgaris subsp. vulgaris OX=3555 PE=3 SV=1
TRINITY_DN2882_c0_g1_i7	1530	0	212.58	0	4.67	0	3.11	10.8434	tr|A0A0K9R1Q6|A0A0K9R1Q6_SPIOL Uncharacterized protein OS=Spinacia oleracea OX=3562 GN=SOVF_116900 PE=3 SV=1
TRINITY_DN2261_c1_g1_i6	2912	0	211.62	0	2.29	0	1.53	10.8366	tr|A0A0K9S241|A0A0K9S241_SPIOL Uncharacterized protein OS=Spinacia oleracea OX=3562 GN=SOVF_009050 PE=3 SV=1
TRINITY_DN3424_c0_g1_i1	3302	0	211.53	0	2.01	0	1.33	10.8366	tr|A0A0K9QIR2|A0A0K9QIR2_SPIOL Uncharacterized protein OS=Spinacia oleracea OX=3562 GN=SOVF_174710 PE=4 SV=1
TRINITY_DN3526_c0_g1_i5	2373	0	209.69	0	2.83	0	1.88	10.8229	tr|A0A0K9QIB0|A0A0K9QIB0_SPIOL ATP-dependent Clp protease proteolytic subunit OS=Spinacia oleracea OX=3562 GN=SOVF_176010 PE=3 SV=1
TRINITY_DN880_c0_g1_i5	1985	0	209.77	0	3.44	0	2.29	10.8229	tr|W0FFD7|W0FFD7_PERHD Drimenol synthase OS=Persicaria hydropiper OX=46901 PE=2 SV=1
TRINITY_DN2701_c0_g1_i15	3916	0	208.59	0	1.65	0	1.1	10.816	tr|A0A0K9QQZ1|A0A0K9QQZ1_SPIOL Uncharacterized protein OS=Spinacia oleracea OX=3562 GN=SOVF_156490 PE=4 SV=1
TRINITY_DN9271_c0_g1_i2	2875	0	209	0	2.3	0	1.53	10.816	tr|A0A0K9R964|A0A0K9R964_SPIOL Uncharacterized protein OS=Spinacia oleracea OX=3562 GN=SOVF_099180 PE=4 SV=1
TRINITY_DN2218_c1_g1_i6	2601	0	208.45	0	2.55	0	1.7	10.8091	tr|A0A0K9RZB7|A0A0K9RZB7_SPIOL Uncharacterized protein OS=Spinacia oleracea OX=3562 GN=SOVF_017110 PE=4 SV=1
TRINITY_DN2950_c0_g2_i11	4014	0	207.81	0	1.6	0	1.07	10.8091	tr|A0A0K9QK45|A0A0K9QK45_SPIOL Uncharacterized protein OS=Spinacia oleracea OX=3562 GN=SOVF_170350 PE=4 SV=1
TRINITY_DN414_c0_g1_i1	2627	0	207.67	0	2.51	0	1.67	10.8091	tr|A0A0K9RTB1|A0A0K9RTB1_SPIOL Uncharacterized protein OS=Spinacia oleracea OX=3562 GN=SOVF_032050 PE=4 SV=1
TRINITY_DN3315_c0_g1_i4	3460	0	207.38	0	1.87	0	1.25	10.8022	tr|A0A0K9RRM0|A0A0K9RRM0_SPIOL Uncharacterized protein OS=Spinacia oleracea OX=3562 GN=SOVF_042110 PE=4 SV=1
TRINITY_DN1732_c0_g3_i4	605	0	205.75	0	14.45	0	9.62	10.7952	-
TRINITY_DN330_c0_g2_i5	739	0	205.58	0	10.95	0	7.29	10.7952	-
TRINITY_DN388_c0_g1_i8	2300	0	206.25	0	2.88	0	1.92	10.7952	tr|A0A0K9RD07|A0A0K9RD07_SPIOL Uncharacterized protein OS=Spinacia oleracea OX=3562 GN=SOVF_085260 PE=3 SV=1
TRINITY_DN3491_c0_g1_i7	5483	0	204.59	0	1.14	0	0.76	10.7882	tr|A0A0K9QUL3|A0A0K9QUL3_SPIOL Uncharacterized protein OS=Spinacia oleracea OX=3562 GN=SOVF_139590 PE=4 SV=1
TRINITY_DN3833_c0_g1_i8	3830	0	205.1	0	1.66	0	1.11	10.7882	tr|A0A0K9QU28|A0A0K9QU28_SPIOL Hexosyltransferase OS=Spinacia oleracea OX=3562 GN=SOVF_141400 PE=3 SV=1
TRINITY_DN754_c0_g1_i10	6896	0	204.99	0	0.9	0	0.6	10.7882	tr|A0A0K9QYY6|A0A0K9QYY6_SPIOL Uncharacterized protein OS=Spinacia oleracea OX=3562 GN=SOVF_125500 PE=3 SV=1
TRINITY_DN4847_c0_g1_i13	2073	0	203.75	0	3.19	0	2.12	10.7811	tr|A0A0K9R522|A0A0K9R522_SPIOL Uncharacterized protein OS=Spinacia oleracea OX=3562 GN=SOVF_111120 PE=4 SV=1
TRINITY_DN6080_c0_g1_i6	4278	0	203.88	0	1.47	0	0.98	10.7811	tr|A0A0K9R7K0|A0A0K9R7K0_SPIOL Uncharacterized protein OS=Spinacia oleracea OX=3562 GN=SOVF_097930 PE=4 SV=1
TRINITY_DN8540_c0_g2_i1	1072	0	204.22	0	6.8	0	4.52	10.7811	tr|A0A0K9RKI8|A0A0K9RKI8_SPIOL Uncharacterized protein OS=Spinacia oleracea OX=3562 GN=SOVF_062120 PE=4 SV=1
TRINITY_DN11133_c0_g1_i3	788	0	203.14	0	9.95	0	6.62	10.774	tr|A0A0K9QG83|A0A0K9QG83_SPIOL Uncharacterized protein OS=Spinacia oleracea OX=3562 GN=SOVF_182850 PE=4 SV=1
TRINITY_DN2578_c0_g1_i15	697	0	199.59	0	11.51	0	7.66	10.7526	-
TRINITY_DN1579_c2_g1_i3	892	0	196.55	0	8.21	0	5.46	10.7308	-
TRINITY_DN595_c0_g1_i9	5059	0	196.96	0	1.19	0	0.79	10.7308	tr|A0A0K9QVD5|A0A0K9QVD5_SPIOL Uncharacterized protein OS=Spinacia oleracea OX=3562 GN=SOVF_137180 PE=3 SV=1
TRINITY_DN558_c0_g1_i2	2120	0	196.2	0	3	0	1.99	10.7234	tr|A0A0K9Q8S6|A0A0K9Q8S6_SPIOL Uncharacterized protein (Fragment) OS=Spinacia oleracea OX=3562 GN=SOVF_206830 PE=4 SV=1
TRINITY_DN2213_c0_g1_i7	3067	0.03	193.96	0	1.99	0	1.32	10.7087	tr|A0A0K9RXD4|A0A0K9RXD4_SPIOL Uncharacterized protein OS=Spinacia oleracea OX=3562 GN=SOVF_022080 PE=3 SV=1
TRINITY_DN1018_c0_g1_i10	5131	0	190.58	0	1.14	0	0.76	10.6862	tr|A0A0K9QY94|A0A0K9QY94_SPIOL Uncharacterized protein OS=Spinacia oleracea OX=3562 GN=SOVF_133120 PE=4 SV=1
TRINITY_DN3836_c0_g2_i2	1825	0	190.93	0	3.44	0	2.29	10.6862	tr|A0A0K9QFK3|A0A0K9QFK3_SPIOL Uncharacterized protein OS=Spinacia oleracea OX=3562 GN=SOVF_184660 PE=3 SV=1
TRINITY_DN4105_c0_g1_i8	4031	0	190.95	0	1.47	0	0.98	10.6862	tr|A0A0K9QFS8|A0A0K9QFS8_SPIOL Uncharacterized protein OS=Spinacia oleracea OX=3562 GN=SOVF_189310 PE=4 SV=1
TRINITY_DN7223_c0_g1_i1	5669	0	190.88	0	1.03	0	0.68	10.6862	tr|A0FD17|A0FD17_BETVU NBS-LRR type resistance protein OS=Beta vulgaris OX=161934 PE=2 SV=1
TRINITY_DN8442_c0_g1_i3	1544	0	188	0	4.09	0	2.72	10.6634	tr|A0A0K9QER5|A0A0K9QER5_SPIOL Uncharacterized protein OS=Spinacia oleracea OX=3562 GN=SOVF_193070 PE=4 SV=1
TRINITY_DN12453_c0_g1_i1	16861	0	186.84	0	0.33	0	0.22	10.6557	tr|A0A0K9QV03|A0A0K9QV03_SPIOL Midasin OS=Spinacia oleracea OX=3562 GN=SOVF_143350 PE=3 SV=1
TRINITY_DN215_c1_g2_i5	902	0	186.86	0	7.7	0	5.12	10.6557	tr|A0A0K9QU53|A0A0K9QU53_SPIOL Uncharacterized protein OS=Spinacia oleracea OX=3562 GN=SOVF_148050 PE=4 SV=1
TRINITY_DN4847_c0_g1_i7	2151	0	187.23	0	2.81	0	1.87	10.6557	tr|A0A0K9R522|A0A0K9R522_SPIOL Uncharacterized protein OS=Spinacia oleracea OX=3562 GN=SOVF_111120 PE=4 SV=1
TRINITY_DN7065_c0_g1_i2	3691	0.05	186.9	0	1.58	0	1.05	10.6557	tr|A0A0K9QWM4|A0A0K9QWM4_SPIOL Uncharacterized protein OS=Spinacia oleracea OX=3562 GN=SOVF_133110 PE=4 SV=1
TRINITY_DN5181_c0_g1_i6	4821	0	186.44	0	1.19	0	0.79	10.6479	tr|A0A0K9QUM9|A0A0K9QUM9_SPIOL Uncharacterized protein OS=Spinacia oleracea OX=3562 GN=SOVF_146730 PE=4 SV=1
TRINITY_DN4160_c0_g1_i2	4852	0	184.81	0	1.17	0	0.78	10.6402	tr|A0A0K9RPR3|A0A0K9RPR3_SPIOL Uncharacterized protein OS=Spinacia oleracea OX=3562 GN=SOVF_042980 PE=4 SV=1
TRINITY_DN7208_c0_g1_i2	861	0	184.66	0	8.07	0	5.37	10.6402	tr|E7BQD4|E7BQD4_SILLA Gag-pol polyprotein OS=Silene latifolia OX=37657 PE=4 SV=1
TRINITY_DN1336_c0_g1_i17	6508	0	183.64	0	0.86	0	0.57	10.6324	tr|A0A0K9QJV3|A0A0K9QJV3_SPIOL Uncharacterized protein OS=Spinacia oleracea OX=3562 GN=SOVF_171080 PE=3 SV=1
TRINITY_DN1160_c0_g1_i11	2997	0	183.13	0	1.92	0	1.28	10.6245	tr|A0A0K9RXF9|A0A0K9RXF9_SPIOL Uncharacterized protein OS=Spinacia oleracea OX=3562 GN=SOVF_023610 PE=4 SV=1
TRINITY_DN1485_c2_g1_i2	2047	0	182.95	0	2.9	0	1.93	10.6245	tr|A0A0K9RLC7|A0A0K9RLC7_SPIOL Uncharacterized protein OS=Spinacia oleracea OX=3562 GN=SOVF_059040 PE=4 SV=1
TRINITY_DN464_c0_g1_i13	3624	0	183.41	0	1.58	0	1.05	10.6245	tr|A0A0K9R9Y7|A0A0K9R9Y7_SPIOL Uncharacterized protein OS=Spinacia oleracea OX=3562 GN=SOVF_090120 PE=4 SV=1
TRINITY_DN14604_c0_g2_i2	967	0	182	0	6.87	0	4.57	10.6166	tr|Q5U6D4|Q5U6D4_BETVU Orf147a protein OS=Beta vulgaris subsp. vulgaris OX=3555 GN=orf147a PE=4 SV=1
TRINITY_DN1984_c0_g2_i5	1260	0	182.23	0	5.01	0	3.33	10.6166	tr|A0A0K9QK16|A0A0K9QK16_SPIOL Uncharacterized protein OS=Spinacia oleracea OX=3562 GN=SOVF_175600 PE=4 SV=1
TRINITY_DN1991_c0_g1_i4	4904	0	182.46	0	1.14	0	0.76	10.6166	tr|A0A0K9S0E1|A0A0K9S0E1_SPIOL Uncharacterized protein OS=Spinacia oleracea OX=3562 GN=SOVF_008500 PE=4 SV=1
TRINITY_DN4727_c0_g1_i21	2506	0	181.84	0	2.32	0	1.54	10.6166	tr|A0A0K9RHK7|A0A0K9RHK7_SPIOL Uncharacterized protein OS=Spinacia oleracea OX=3562 GN=SOVF_065790 PE=4 SV=1
TRINITY_DN1101_c11_g1_i13	683	0	180.73	0	10.71	0	7.13	10.6087	tr|A0A0K9QAW4|A0A0K9QAW4_SPIOL Uncharacterized protein OS=Spinacia oleracea OX=3562 GN=SOVF_200090 PE=4 SV=1
TRINITY_DN4150_c0_g2_i2	4350	0	180.83	0	1.28	0	0.85	10.6087	tr|A0A0K9RXS0|A0A0K9RXS0_SPIOL Uncharacterized protein OS=Spinacia oleracea OX=3562 GN=SOVF_016770 PE=4 SV=1
TRINITY_DN5205_c0_g1_i8	1904	0	181.34	0	3.12	0	2.07	10.6087	tr|A0A0K9R130|A0A0K9R130_SPIOL Uncharacterized protein OS=Spinacia oleracea OX=3562 GN=SOVF_118830 PE=4 SV=1
TRINITY_DN8494_c1_g1_i1	466	0	180.54	0	18.93	0	12.59	10.6087	-
TRINITY_DN2568_c0_g1_i6	3851	0	179.95	0	1.45	0	0.97	10.6007	tr|A0A0K9R2B8|A0A0K9R2B8_SPIOL Uncharacterized protein OS=Spinacia oleracea OX=3562 GN=SOVF_120970 PE=4 SV=1
TRINITY_DN10434_c0_g1_i7	3199	0	178.56	0	1.75	0	1.17	10.5926	tr|J3SIC5|J3SIC5_BETVU Calmcium/calmodulin-dependent protein kinase CDPK2 OS=Beta vulgaris subsp. vulgaris OX=3555 PE=3 SV=1
TRINITY_DN1623_c0_g1_i9	4704	0.01	178.85	0	1.17	0	0.78	10.5926	tr|A0A0K9RAT5|A0A0K9RAT5_SPIOL Uncharacterized protein OS=Spinacia oleracea OX=3562 GN=SOVF_087380 PE=4 SV=1
TRINITY_DN4342_c0_g1_i2	557	0	178.93	0	14.19	0	9.44	10.5926	-
TRINITY_DN3088_c0_g1_i8	4622	0	178.29	0	1.19	0	0.79	10.5846	tr|A0A0K9S3E8|A0A0K9S3E8_SPIOL Uncharacterized protein OS=Spinacia oleracea OX=3562 GN=SOVF_004070 PE=4 SV=1
TRINITY_DN4246_c0_g1_i8	4784	0	176.95	0	1.14	0	0.76	10.5764	tr|A0A0K9QM99|A0A0K9QM99_SPIOL Uncharacterized protein OS=Spinacia oleracea OX=3562 GN=SOVF_162900 PE=4 SV=1
TRINITY_DN8646_c0_g1_i2	6323	0	177.36	0	0.85	0	0.57	10.5764	tr|A0A0K9QPP2|A0A0K9QPP2_SPIOL Uncharacterized protein OS=Spinacia oleracea OX=3562 GN=SOVF_160670 PE=4 SV=1
TRINITY_DN1710_c0_g3_i3	789	0	175.99	0	8.6	0	5.72	10.5683	-
TRINITY_DN2327_c0_g1_i6	3872	0	175.65	0	1.41	0	0.94	10.5683	tr|A0A0K9R6A9|A0A0K9R6A9_SPIOL Uncharacterized protein OS=Spinacia oleracea OX=3562 GN=SOVF_101950 PE=3 SV=1
TRINITY_DN3313_c0_g1_i5	5074	0	176.47	0	1.07	0	0.71	10.5683	tr|A0A0J8CV23|A0A0J8CV23_BETVU Uncharacterized protein OS=Beta vulgaris subsp. vulgaris OX=3555 GN=BVRB_2g036690 PE=4 SV=1
TRINITY_DN543_c0_g1_i1	1902	0	175.79	0	3.03	0	2.01	10.5683	tr|A0A0K9R9W9|A0A0K9R9W9_SPIOL Uncharacterized protein OS=Spinacia oleracea OX=3562 GN=SOVF_090170 PE=4 SV=1
TRINITY_DN7000_c0_g1_i2	850	0	176.32	0	7.83	0	5.21	10.5683	tr|A0A0K9RFI2|A0A0K9RFI2_SPIOL Uncharacterized protein (Fragment) OS=Spinacia oleracea OX=3562 GN=SOVF_072650 PE=4 SV=1
TRINITY_DN1612_c0_g1_i9	4815	0.34	174.58	0	1.11	0	0.74	10.56	tr|A0A0J8BI59|A0A0J8BI59_BETVU Vacuolar protein sorting-associated protein 35 OS=Beta vulgaris subsp. vulgaris OX=3555 GN=BVRB_1g020710 PE=3 SV=1
TRINITY_DN306_c0_g2_i2	3739	0	173.88	0	1.45	0	0.96	10.5518	tr|A0A0K9QU83|A0A0K9QU83_SPIOL Uncharacterized protein OS=Spinacia oleracea OX=3562 GN=SOVF_140540 PE=4 SV=1
TRINITY_DN5943_c0_g3_i4	3993	0.47	173.04	0	1.34	0	0.89	10.5435	tr|A0A0K9QPW3|A0A0K9QPW3_SPIOL Peptidylprolyl isomerase OS=Spinacia oleracea OX=3562 GN=SOVF_154880 PE=4 SV=1
TRINITY_DN1000_c0_g1_i6	6808	0	172.32	0	0.77	0	0.51	10.5351	tr|A0A0K9RBD5|A0A0K9RBD5_SPIOL Uncharacterized protein OS=Spinacia oleracea OX=3562 GN=SOVF_085770 PE=4 SV=1
TRINITY_DN10926_c0_g1_i7	1207	0	172.38	0	4.98	0	3.32	10.5351	tr|A0A0K9QBE1|A0A0K9QBE1_SPIOL Uncharacterized protein OS=Spinacia oleracea OX=3562 GN=SOVF_203600 PE=4 SV=1
TRINITY_DN11037_c0_g1_i3	2328	0.39	172.16	0.01	2.37	0	1.58	10.5351	tr|A0A0K9QG76|A0A0K9QG76_SPIOL Uncharacterized protein OS=Spinacia oleracea OX=3562 GN=SOVF_188200 PE=4 SV=1
TRINITY_DN2911_c0_g1_i16	8452	0	171.58	0	0.61	0	0.41	10.5351	tr|A0A0K9QW25|A0A0K9QW25_SPIOL Uncharacterized protein OS=Spinacia oleracea OX=3562 GN=SOVF_135030 PE=4 SV=1
TRINITY_DN9289_c0_g1_i4	2337	0	172.25	0	2.37	0	1.57	10.5351	tr|A0A0K9RFR1|A0A0K9RFR1_SPIOL Uncharacterized protein OS=Spinacia oleracea OX=3562 GN=SOVF_071800 PE=4 SV=1
TRINITY_DN1466_c0_g2_i7	2689	0	171.3	0	2.02	0	1.35	10.5267	tr|A0A0K9RK67|A0A0K9RK67_SPIOL ATP synthase subunit gamma OS=Spinacia oleracea OX=3562 GN=SOVF_062960 PE=3 SV=1
TRINITY_DN17119_c0_g1_i5	2630	0	171.06	0	2.07	0	1.38	10.5267	tr|A0A0K9RDS6|A0A0K9RDS6_SPIOL WAT1-related protein OS=Spinacia oleracea OX=3562 GN=SOVF_077790 PE=3 SV=1
TRINITY_DN1466_c1_g1_i8	4580	0	170.04	0	1.14	0	0.76	10.5183	tr|A0A0K9QPV0|A0A0K9QPV0_SPIOL Uncharacterized protein OS=Spinacia oleracea OX=3562 GN=SOVF_154870 PE=4 SV=1
TRINITY_DN305_c0_g1_i21	2670	0	169.88	0	2.02	0	1.34	10.5183	tr|A0A0K9RDJ5|A0A0K9RDJ5_SPIOL Uncharacterized protein OS=Spinacia oleracea OX=3562 GN=SOVF_084920 PE=4 SV=1
TRINITY_DN5514_c0_g2_i1	4293	0	169.95	0	1.22	0	0.81	10.5183	tr|A0A0K9QK85|A0A0K9QK85_SPIOL Uncharacterized protein OS=Spinacia oleracea OX=3562 GN=SOVF_174980 PE=4 SV=1
TRINITY_DN557_c0_g1_i3	1869	0	170.22	0	2.99	0	1.99	10.5183	tr|A0A0K9S0E6|A0A0K9S0E6_SPIOL Uncharacterized protein OS=Spinacia oleracea OX=3562 GN=SOVF_008470 PE=4 SV=1
TRINITY_DN5585_c0_g1_i4	1987	0.06	170.36	0	2.79	0	1.86	10.5183	tr|A0A0K9QDM4|A0A0K9QDM4_SPIOL Uncharacterized protein OS=Spinacia oleracea OX=3562 GN=SOVF_198040 PE=3 SV=1
TRINITY_DN3030_c0_g3_i1	1713	0	168	0	3.25	0	2.16	10.5012	tr|A0A0J8B8A1|A0A0J8B8A1_BETVU Uncharacterized protein OS=Beta vulgaris subsp. vulgaris OX=3555 GN=BVRB_000980 PE=4 SV=1
TRINITY_DN721_c0_g1_i17	1919	0	168.48	0	2.87	0	1.91	10.5012	tr|A0A0K9RI38|A0A0K9RI38_SPIOL Uncharacterized protein OS=Spinacia oleracea OX=3562 GN=SOVF_064090 PE=4 SV=1
TRINITY_DN1293_c0_g2_i9	3543	1.31	1419.75	0.01	12.5	0.01	8.32	10.4986	tr|F4MLC7|F4MLC7_BETVM Uncharacterized protein OS=Beta vulgaris subsp. maritima OX=350892 GN=orf266 PE=4 SV=1
TRINITY_DN20179_c1_g1_i13	3181	0	167.45	0	1.65	0	1.1	10.4926	tr|A0A0J8FG96|A0A0J8FG96_BETVU Beta-galactosidase OS=Beta vulgaris subsp. vulgaris OX=3555 GN=BVRB_3g065740 PE=3 SV=1
TRINITY_DN1584_c0_g3_i1	1964	0	166	0	2.76	0	1.83	10.4839	tr|A0A0K9RDR7|A0A0K9RDR7_SPIOL Uncharacterized protein OS=Spinacia oleracea OX=3562 GN=SOVF_084200 PE=4 SV=1
TRINITY_DN101_c0_g1_i8	3896	0	165	0	1.31	0	0.87	10.4752	tr|A0A0K9R319|A0A0K9R319_SPIOL Uncharacterized protein (Fragment) OS=Spinacia oleracea OX=3562 GN=SOVF_119030 PE=4 SV=1
TRINITY_DN3149_c0_g1_i17	5105	0	165.47	0	0.99	0	0.66	10.4752	tr|A0A2D1PE19|A0A2D1PE19_9CARY Putative cytochrome P450 OS=Fallopia multiflora OX=76025 GN=CYP1 PE=2 SV=1
TRINITY_DN1485_c2_g1_i4	1940	0	164.04	0	2.76	0	1.84	10.4665	tr|A0A0K9RLC7|A0A0K9RLC7_SPIOL Uncharacterized protein OS=Spinacia oleracea OX=3562 GN=SOVF_059040 PE=4 SV=1
TRINITY_DN3252_c0_g2_i5	4475	0	163.56	0	1.13	0	0.75	10.4665	tr|F4NCG1|F4NCG1_BETVU Uncharacterized protein OS=Beta vulgaris subsp. vulgaris OX=3555 PE=4 SV=1
TRINITY_DN3398_c0_g2_i9	1582	0.03	164	0	3.47	0	2.31	10.4665	tr|A0A0K9QIE5|A0A0K9QIE5_SPIOL Uncharacterized protein OS=Spinacia oleracea OX=3562 GN=SOVF_175780 PE=4 SV=1
TRINITY_DN5168_c0_g1_i1	1013	0	164.21	0	5.86	0	3.9	10.4665	tr|A0A0K9QDY0|A0A0K9QDY0_SPIOL Mitochondrial Rho GTPase OS=Spinacia oleracea OX=3562 GN=SOVF_190020 PE=3 SV=1
TRINITY_DN3960_c1_g1_i12	1634	0	163.3	0	3.33	0	2.22	10.4576	tr|A0A0J8B8J8|A0A0J8B8J8_BETVU Uncharacterized protein OS=Beta vulgaris subsp. vulgaris OX=3555 GN=BVRB_5g125590 PE=4 SV=1
TRINITY_DN7644_c0_g1_i4	1123	0.12	162.76	0	5.13	0	3.41	10.4576	tr|A0A0K9QTH3|A0A0K9QTH3_SPIOL Uncharacterized protein OS=Spinacia oleracea OX=3562 GN=SOVF_143360 PE=3 SV=1
TRINITY_DN7739_c0_g1_i1	2185	0	163	0	2.41	0	1.6	10.4576	tr|A0A0K9QX09|A0A0K9QX09_SPIOL Uncharacterized protein (Fragment) OS=Spinacia oleracea OX=3562 GN=SOVF_131870 PE=4 SV=1
TRINITY_DN1497_c0_g1_i2	2018	0	162	0	2.61	0	1.74	10.4488	tr|A0A0K9R4X6|A0A0K9R4X6_SPIOL Uncharacterized protein OS=Spinacia oleracea OX=3562 GN=SOVF_106550 PE=4 SV=1
TRINITY_DN195_c2_g2_i1	969	0	162.42	0	6.12	0	4.07	10.4488	-
TRINITY_DN5965_c0_g1_i13	2608	0	161.79	0	1.97	0	1.31	10.4488	tr|A0A0K9R7D9|A0A0K9R7D9_SPIOL Uncharacterized protein OS=Spinacia oleracea OX=3562 GN=SOVF_102900 PE=4 SV=1
TRINITY_DN2780_c1_g1_i1	1490	0	161.26	0	3.65	0	2.43	10.4398	tr|E7BQD5|E7BQD5_SILLA Gag-pol polyprotein OS=Silene latifolia OX=37657 PE=4 SV=1
TRINITY_DN3487_c2_g1_i4	1951	0	160.8	0	2.69	0	1.79	10.4398	tr|Q9FQK2|Q9FQK2_AMAHY Reverse transcriptase-like protein (Fragment) OS=Amaranthus hybridus OX=3565 PE=4 SV=1
TRINITY_DN13976_c0_g1_i3	2145	0	159.64	0	2.41	0	1.6	10.4309	tr|A0A0K9R1D0|A0A0K9R1D0_SPIOL RING-type E3 ubiquitin transferase OS=Spinacia oleracea OX=3562 GN=SOVF_123250 PE=4 SV=1
TRINITY_DN2638_c0_g1_i27	3692	0	159.63	0	1.35	0	0.9	10.4309	tr|A0A0K9QYN4|A0A0K9QYN4_SPIOL Uncharacterized protein OS=Spinacia oleracea OX=3562 GN=SOVF_125920 PE=3 SV=1
TRINITY_DN6434_c1_g2_i6	3680	0	160.25	0	1.36	0	0.9	10.4309	tr|A0A0K9Q8R1|A0A0K9Q8R1_SPIOL Aldehyde dehydrogenase OS=Spinacia oleracea OX=3562 GN=SOVF_212440 PE=3 SV=1
TRINITY_DN1664_c0_g1_i6	1711	0	159.47	0	3.09	0	2.05	10.4218	tr|A0A0K9RHI8|A0A0K9RHI8_SPIOL Uncharacterized protein OS=Spinacia oleracea OX=3562 GN=SOVF_070650 PE=4 SV=1
TRINITY_DN23548_c0_g1_i2	3109	0	159.07	0	1.61	0	1.07	10.4218	-
TRINITY_DN3394_c0_g1_i7	6158	0	157.51	0	0.78	0	0.52	10.4127	tr|A0A0K9QZQ0|A0A0K9QZQ0_SPIOL Uncharacterized protein OS=Spinacia oleracea OX=3562 GN=SOVF_123140 PE=4 SV=1
TRINITY_DN5033_c0_g1_i9	1936	0	158.09	0	2.67	0	1.78	10.4127	tr|A0A0K9QP60|A0A0K9QP60_SPIOL Uncharacterized protein OS=Spinacia oleracea OX=3562 GN=SOVF_163330 PE=4 SV=1
TRINITY_DN5768_c1_g1_i5	4058	0	158.19	0	1.21	0	0.8	10.4127	-
TRINITY_DN13884_c0_g1_i10	2156	0.01	156.51	0	2.35	0	1.56	10.4036	tr|A0A0K9RLR8|A0A0K9RLR8_SPIOL Uncharacterized protein OS=Spinacia oleracea OX=3562 GN=SOVF_057520 PE=4 SV=1
TRINITY_DN14501_c0_g2_i2	861	0	157.07	0	6.86	0	4.57	10.4036	-
TRINITY_DN1988_c0_g1_i1	4540	0	157.12	0	1.07	0	0.71	10.4036	tr|A0A0K9R0X6|A0A0K9R0X6_SPIOL Uncharacterized protein OS=Spinacia oleracea OX=3562 GN=SOVF_125820 PE=4 SV=1
TRINITY_DN5096_c0_g2_i1	3723	0	157.41	0	1.31	0	0.87	10.4036	tr|A0A0K9QQR0|A0A0K9QQR0_SPIOL Uncharacterized protein OS=Spinacia oleracea OX=3562 GN=SOVF_152240 PE=4 SV=1
TRINITY_DN987_c0_g1_i2	4007	0	157.15	0	1.22	0	0.81	10.4036	tr|A0A0K9QF84|A0A0K9QF84_SPIOL Uncharacterized protein OS=Spinacia oleracea OX=3562 GN=SOVF_191370 PE=3 SV=1
TRINITY_DN4159_c0_g1_i3	2058	0	155.85	0	2.46	0	1.64	10.3944	tr|A0A0K9QRS0|A0A0K9QRS0_SPIOL Uncharacterized protein (Fragment) OS=Spinacia oleracea OX=3562 GN=SOVF_148390 PE=4 SV=1
TRINITY_DN14911_c0_g1_i8	499	0	154.65	0	14.52	0	9.66	10.3851	tr|A0A0K9RBI0|A0A0K9RBI0_SPIOL Uncharacterized protein OS=Spinacia oleracea OX=3562 GN=SOVF_089720 PE=4 SV=1
TRINITY_DN6577_c0_g4_i1	1777	0	154.53	0	2.87	0	1.91	10.3851	tr|A0A0K9RPH9|A0A0K9RPH9_SPIOL Uncharacterized protein OS=Spinacia oleracea OX=3562 GN=SOVF_043600 PE=4 SV=1
TRINITY_DN880_c0_g1_i1	2451	0	154.62	0	2.02	0	1.34	10.3851	tr|A0A0K9R3A3|A0A0K9R3A3_SPIOL Uncharacterized protein OS=Spinacia oleracea OX=3562 GN=SOVF_109960 PE=4 SV=1
TRINITY_DN409_c1_g1_i14	1952	0	153.51	0	2.57	0	1.71	10.3758	tr|A0A0K9R0V6|A0A0K9R0V6_SPIOL Uncharacterized protein OS=Spinacia oleracea OX=3562 GN=SOVF_124600 PE=4 SV=1
TRINITY_DN7973_c0_g1_i7	3197	0	154.14	0	1.51	0	1.01	10.3758	tr|A0A0K9R1I4|A0A0K9R1I4_SPIOL Mitogen-activated protein kinase OS=Spinacia oleracea OX=3562 GN=SOVF_117550 PE=3 SV=1
TRINITY_DN879_c0_g4_i2	891	0	154.22	0	6.45	0	4.29	10.3758	tr|A0A0K9RLP3|A0A0K9RLP3_SPIOL Uncharacterized protein OS=Spinacia oleracea OX=3562 GN=SOVF_057940 PE=4 SV=1
TRINITY_DN1242_c1_g5_i1	1006	0	152.78	0	5.5	0	3.66	10.3664	-
TRINITY_DN3641_c0_g1_i2	1474	0	153	0	3.51	0	2.33	10.3664	tr|A0A0K9QTP4|A0A0K9QTP4_SPIOL Uncharacterized protein OS=Spinacia oleracea OX=3562 GN=SOVF_147500 PE=4 SV=1
TRINITY_DN4975_c0_g1_i11	2463	0	153.31	0	1.99	0	1.32	10.3664	tr|A0A0K9QBY2|A0A0K9QBY2_SPIOL Uncharacterized protein OS=Spinacia oleracea OX=3562 GN=SOVF_203290 PE=4 SV=1
TRINITY_DN699_c0_g2_i2	3260	0	152.96	0	1.47	0	0.98	10.3664	tr|A0A0K9QCJ7|A0A0K9QCJ7_SPIOL Uncharacterized protein OS=Spinacia oleracea OX=3562 GN=SOVF_200030 PE=3 SV=1
TRINITY_DN735_c0_g1_i7	439	0	152.89	0	17.72	0	11.79	10.3664	-
TRINITY_DN5138_c0_g1_i12	3681	0	151.55	0	1.28	0	0.85	10.3569	tr|A0A0K9RNP1|A0A0K9RNP1_SPIOL Uncharacterized protein OS=Spinacia oleracea OX=3562 GN=SOVF_051490 PE=3 SV=1
TRINITY_DN6145_c0_g1_i19	980	0	151.84	0	5.64	0	3.75	10.3569	tr|A0A0K9QY10|A0A0K9QY10_SPIOL Uncharacterized protein OS=Spinacia oleracea OX=3562 GN=SOVF_135320 PE=4 SV=1
TRINITY_DN14228_c0_g1_i1	1691	0	151.11	0	2.96	0	1.97	10.3474	tr|A0A0K9RBQ9|A0A0K9RBQ9_SPIOL Uncharacterized protein OS=Spinacia oleracea OX=3562 GN=SOVF_088580 PE=4 SV=1
TRINITY_DN235_c0_g1_i13	5084	0.28	151.19	0	0.91	0	0.61	10.3474	tr|A0A0K9R5U0|A0A0K9R5U0_SPIOL Uncharacterized protein OS=Spinacia oleracea OX=3562 GN=SOVF_108690 PE=4 SV=1
TRINITY_DN4767_c0_g1_i1	3923	0	151.24	0	1.2	0	0.8	10.3474	tr|A0A0K9RE76|A0A0K9RE76_SPIOL Uncharacterized protein OS=Spinacia oleracea OX=3562 GN=SOVF_082820 PE=4 SV=1
TRINITY_DN6257_c1_g2_i1	1443	0	150.56	0	3.54	0	2.35	10.3474	tr|A0A0K9R0R7|A0A0K9R0R7_SPIOL Protein DETOXIFICATION OS=Spinacia oleracea OX=3562 GN=SOVF_126240 PE=3 SV=1
TRINITY_DN7913_c1_g1_i5	4375	0	150.9	0	1.06	0	0.71	10.3474	tr|A0A0K9RAN7|A0A0K9RAN7_SPIOL Uncharacterized protein OS=Spinacia oleracea OX=3562 GN=SOVF_087320 PE=4 SV=1
TRINITY_DN10663_c0_g1_i1	1723	0	150.15	0	2.88	0	1.92	10.3378	tr|A0A0K9QJF0|A0A0K9QJF0_SPIOL Uncharacterized protein OS=Spinacia oleracea OX=3562 GN=SOVF_178730 PE=4 SV=1
TRINITY_DN15211_c0_g1_i11	4502	0	150.29	0	1.03	0	0.68	10.3378	tr|A0A0J8B547|A0A0J8B547_BETVU CASP-like protein OS=Beta vulgaris subsp. vulgaris OX=3555 GN=BVRB_002450 PE=3 SV=1
TRINITY_DN3838_c0_g1_i1	1964	0	150.22	0	2.5	0	1.66	10.3378	tr|A0A0K9RCI7|A0A0K9RCI7_SPIOL Uncharacterized protein OS=Spinacia oleracea OX=3562 GN=SOVF_088260 PE=4 SV=1
TRINITY_DN4502_c0_g1_i6	2329	0	150.1	0	2.07	0	1.38	10.3378	tr|A0A0K9RHL0|A0A0K9RHL0_SPIOL Chlorophyll a-b binding protein, chloroplastic OS=Spinacia oleracea OX=3562 GN=SOVF_065920 PE=3 SV=1
TRINITY_DN2014_c0_g1_i4	2948	0	149.34	0	1.6	0	1.06	10.3282	tr|A0A0J8BWI7|A0A0J8BWI7_BETVU Uncharacterized protein OS=Beta vulgaris subsp. vulgaris OX=3555 GN=BVRB_7g165050 PE=3 SV=1
TRINITY_DN3878_c0_g4_i1	1649	0	149.35	0	3.01	0	2.01	10.3282	-
TRINITY_DN2412_c0_g1_i3	2421	0	148.28	0	1.96	0	1.3	10.3185	tr|A0A0K9R7A3|A0A0K9R7A3_SPIOL Uncharacterized protein OS=Spinacia oleracea OX=3562 GN=SOVF_098650 PE=4 SV=1
TRINITY_DN5483_c0_g1_i12	5907	0	148.29	0	0.77	0	0.51	10.3185	tr|G9FIF2|G9FIF2_BETVU Uncharacterized protein OS=Beta vulgaris OX=161934 PE=4 SV=1
TRINITY_DN2703_c0_g1_i6	2482	0	147.17	0	1.89	0	1.26	10.3087	tr|A0A0K9R134|A0A0K9R134_SPIOL Uncharacterized protein OS=Spinacia oleracea OX=3562 GN=SOVF_118760 PE=4 SV=1
TRINITY_DN1319_c0_g1_i7	2240	0	145.93	0	2.1	0	1.4	10.2989	tr|A0A0K9R4F7|A0A0K9R4F7_SPIOL Uncharacterized protein OS=Spinacia oleracea OX=3562 GN=SOVF_107950 PE=4 SV=1
TRINITY_DN1888_c0_g2_i5	1546	0	145.6	0	3.16	0	2.1	10.2989	tr|A0A0K9QXF7|A0A0K9QXF7_SPIOL Uncharacterized protein OS=Spinacia oleracea OX=3562 GN=SOVF_135700 PE=4 SV=1
TRINITY_DN4728_c0_g1_i10	2945	0	146.41	0	1.57	0	1.04	10.2989	tr|A0A0K9RF81|A0A0K9RF81_SPIOL Uncharacterized protein OS=Spinacia oleracea OX=3562 GN=SOVF_077780 PE=3 SV=1
TRINITY_DN7553_c2_g2_i1	1021	0	145.64	0	5.15	0	3.42	10.2989	-
TRINITY_DN1375_c1_g1_i10	3660	0.29	144.66	0	1.23	0	0.82	10.2889	tr|A0A0K9RJP8|A0A0K9RJP8_SPIOL Uncharacterized protein OS=Spinacia oleracea OX=3562 GN=SOVF_058950 PE=4 SV=1
TRINITY_DN2610_c1_g1_i5	765	0.5	144.86	0.02	7.37	0.02	4.91	10.2889	-
TRINITY_DN5724_c0_g1_i9	4885	0	145.21	0	0.91	0	0.61	10.2889	tr|A0A0K9RNE9|A0A0K9RNE9_SPIOL Uncharacterized protein OS=Spinacia oleracea OX=3562 GN=SOVF_046860 PE=4 SV=1
TRINITY_DN6206_c0_g1_i1	3466	0	144.97	0	1.31	0	0.87	10.2889	tr|A0A0K9S0M3|A0A0K9S0M3_SPIOL Uncharacterized protein OS=Spinacia oleracea OX=3562 GN=SOVF_013460 PE=4 SV=1
TRINITY_DN1459_c0_g1_i4	2971	0	144.22	0	1.53	0	1.02	10.279	tr|A0A0K9QA62|A0A0K9QA62_SPIOL Uncharacterized protein OS=Spinacia oleracea OX=3562 GN=SOVF_202240 PE=4 SV=1
TRINITY_DN3749_c0_g1_i3	1272	0	144.34	0	3.92	0	2.61	10.279	tr|A0A0K1LXK2|A0A0K1LXK2_9CARY Dehydration responsive element binding transcription factor 2A OS=Haloxylon ammodendron OX=151230 GN=DREB2A PE=2 SV=1
TRINITY_DN575_c0_g2_i5	2520	0	143.74	0	1.82	0	1.21	10.279	tr|A0A0K9QGH2|A0A0K9QGH2_SPIOL Uncharacterized protein (Fragment) OS=Spinacia oleracea OX=3562 GN=SOVF_187160 PE=4 SV=1
TRINITY_DN8064_c0_g1_i2	2015	0.06	144.18	0	2.33	0	1.55	10.279	tr|A0A0K9QSJ2|A0A0K9QSJ2_SPIOL Uncharacterized protein OS=Spinacia oleracea OX=3562 GN=SOVF_146500 PE=4 SV=1
TRINITY_DN5965_c0_g1_i12	1875	0	142.71	0	2.5	0	1.66	10.2689	tr|A0A0K9R7D9|A0A0K9R7D9_SPIOL Uncharacterized protein OS=Spinacia oleracea OX=3562 GN=SOVF_102900 PE=4 SV=1
TRINITY_DN806_c0_g1_i8	1791	0	142.84	0	2.63	0	1.75	10.2689	tr|A0A0C5AZ91|A0A0C5AZ91_9CARY Acyl carrier protein OS=Suaeda glauca OX=397272 PE=2 SV=1
TRINITY_DN1105_c1_g1_i14	4215	0	142.15	0	1.04	0	0.69	10.2588	tr|A0A0K9QP25|A0A0K9QP25_SPIOL Uncharacterized protein OS=Spinacia oleracea OX=3562 GN=SOVF_157710 PE=4 SV=1
TRINITY_DN15688_c0_g1_i1	2712	0	142	0	1.66	0	1.11	10.2588	-
TRINITY_DN2566_c0_g1_i2	808	0	142.43	0	6.75	0	4.49	10.2588	-
TRINITY_DN10483_c0_g2_i9	2929	0.01	140.54	0	1.51	0	1.01	10.2486	tr|A0A0K9RQD1|A0A0K9RQD1_SPIOL Uncharacterized protein OS=Spinacia oleracea OX=3562 GN=SOVF_041040 PE=4 SV=1
TRINITY_DN2589_c1_g1_i6	7885	0	141.26	0	0.54	0	0.36	10.2486	tr|A0A0K9QMN4|A0A0K9QMN4_SPIOL Defective in cullin neddylation protein OS=Spinacia oleracea OX=3562 GN=SOVF_166730 PE=4 SV=1
TRINITY_DN2909_c3_g2_i5	1290	0	141.48	0	3.78	0	2.52	10.2486	tr|A0A0K9QNF5|A0A0K9QNF5_SPIOL Uncharacterized protein OS=Spinacia oleracea OX=3562 GN=SOVF_164510 PE=3 SV=1
TRINITY_DN1094_c0_g1_i4	4455	0	139.84	0	0.97	0	0.64	10.2384	tr|A0A0J8B6W8|A0A0J8B6W8_BETVU Uncharacterized protein OS=Beta vulgaris subsp. vulgaris OX=3555 GN=BVRB_007480 PE=4 SV=1
TRINITY_DN1098_c1_g1_i3	3753	0.01	140.41	0	1.16	0	0.77	10.2384	tr|A0A0K9S1Q3|A0A0K9S1Q3_SPIOL Uncharacterized protein OS=Spinacia oleracea OX=3562 GN=SOVF_004350 PE=4 SV=1
TRINITY_DN2583_c0_g1_i10	3534	0	139.9	0	1.23	0	0.82	10.2384	tr|A0A0K9RE91|A0A0K9RE91_SPIOL Uncharacterized protein OS=Spinacia oleracea OX=3562 GN=SOVF_076440 PE=4 SV=1
TRINITY_DN6478_c0_g1_i5	1069	0	139.8	0	4.67	0	3.11	10.2384	tr|A0A0K9RMV8|A0A0K9RMV8_SPIOL Thymidine kinase OS=Spinacia oleracea OX=3562 GN=SOVF_054150 PE=3 SV=1
TRINITY_DN957_c0_g3_i2	1210	0	140.49	0	4.05	0	2.69	10.2384	tr|A0A0K9R9J6|A0A0K9R9J6_SPIOL Uncharacterized protein OS=Spinacia oleracea OX=3562 GN=SOVF_098020 PE=4 SV=1
TRINITY_DN13904_c0_g3_i1	2203	0	138.27	0	2.02	0	1.35	10.2176	tr|A0A0K9QMK0|A0A0K9QMK0_SPIOL alpha-1,2-Mannosidase OS=Spinacia oleracea OX=3562 GN=SOVF_162330 PE=3 SV=1
TRINITY_DN3452_c0_g3_i1	1666	0	137.62	0	2.75	0	1.83	10.2176	tr|A0A0K9R1U2|A0A0K9R1U2_SPIOL Uncharacterized protein OS=Spinacia oleracea OX=3562 GN=SOVF_115690 PE=4 SV=1
TRINITY_DN10378_c0_g1_i7	2675	0	136.66	0	1.62	0	1.08	10.2071	tr|A0A0K9QNP6|A0A0K9QNP6_SPIOL Uncharacterized protein OS=Spinacia oleracea OX=3562 GN=SOVF_158830 PE=4 SV=1
TRINITY_DN11988_c0_g1_i3	2778	0	136.72	0	1.56	0	1.04	10.2071	tr|A0A0K9QTV4|A0A0K9QTV4_SPIOL Uncharacterized protein OS=Spinacia oleracea OX=3562 GN=SOVF_142040 PE=4 SV=1
TRINITY_DN2905_c0_g1_i9	2877	0	137.18	0	1.51	0	1	10.2071	tr|A0A0K9RS78|A0A0K9RS78_SPIOL Uncharacterized protein OS=Spinacia oleracea OX=3562 GN=SOVF_041380 PE=4 SV=1
TRINITY_DN5117_c0_g2_i5	781	0	137.05	0	6.79	0	4.52	10.2071	tr|A0A0K9QDS3|A0A0K9QDS3_SPIOL Uncharacterized protein (Fragment) OS=Spinacia oleracea OX=3562 GN=SOVF_190600 PE=4 SV=1
TRINITY_DN550_c0_g2_i5	2470	0	135.91	0	1.76	0	1.17	10.1966	tr|A0A0K9RNU7|A0A0K9RNU7_SPIOL Trafficking protein particle complex subunit OS=Spinacia oleracea OX=3562 GN=SOVF_045510 PE=3 SV=1
TRINITY_DN21427_c0_g1_i1	6640	0	134.83	0	0.62	0	0.41	10.1859	tr|A0A0K9QL03|A0A0K9QL03_SPIOL Uncharacterized protein OS=Spinacia oleracea OX=3562 GN=SOVF_172460 PE=4 SV=1
TRINITY_DN5285_c0_g1_i8	573	0	135.19	0	10.28	0	6.84	10.1859	-
TRINITY_DN2591_c0_g1_i10	4858	0	134.29	0	0.85	0	0.57	10.1752	tr|A0A0K9RY32|A0A0K9RY32_SPIOL Uncharacterized protein OS=Spinacia oleracea OX=3562 GN=SOVF_016200 PE=4 SV=1
TRINITY_DN10327_c0_g1_i2	1781	0	132.81	0	2.46	0	1.64	10.1644	tr|A0A0K9RIW6|A0A0K9RIW6_SPIOL Uncharacterized protein OS=Spinacia oleracea OX=3562 GN=SOVF_061560 PE=4 SV=1
TRINITY_DN1157_c1_g1_i3	1738	0.25	133.2	0	2.53	0	1.69	10.1644	tr|A0A0K9RI90|A0A0K9RI90_SPIOL Uncharacterized protein OS=Spinacia oleracea OX=3562 GN=SOVF_069020 PE=4 SV=1
TRINITY_DN4681_c0_g2_i2	2324	0	132.64	0	1.83	0	1.22	10.1644	tr|A0A0K9RRN1|A0A0K9RRN1_SPIOL Uncharacterized protein OS=Spinacia oleracea OX=3562 GN=SOVF_041940 PE=4 SV=1
TRINITY_DN5926_c0_g1_i18	2524	0	133.45	0	1.69	0	1.12	10.1644	tr|A0A0K9RI43|A0A0K9RI43_SPIOL Uncharacterized protein OS=Spinacia oleracea OX=3562 GN=SOVF_064450 PE=4 SV=1
TRINITY_DN10146_c0_g2_i9	4283	0	132.11	0	0.95	0	0.63	10.1535	tr|A0A0K9RRK0|A0A0K9RRK0_SPIOL Uncharacterized protein OS=Spinacia oleracea OX=3562 GN=SOVF_036830 PE=4 SV=1
TRINITY_DN3760_c1_g1_i3	618	0	132.27	0	9.01	0	6	10.1535	-
TRINITY_DN4027_c0_g1_i3	3409	0	132.34	0	1.21	0	0.81	10.1535	tr|A0A0K9R568|A0A0K9R568_SPIOL Uncharacterized protein OS=Spinacia oleracea OX=3562 GN=SOVF_110920 PE=4 SV=1
TRINITY_DN817_c0_g1_i10	2024	0	131.77	0	2.12	0	1.41	10.1535	tr|A0A0K9S3L9|A0A0K9S3L9_SPIOL Uncharacterized protein OS=Spinacia oleracea OX=3562 GN=SOVF_002810 PE=4 SV=1
TRINITY_DN11038_c0_g1_i1	2766	0	130.7	0	1.5	0	1	10.1426	tr|A0A0K9QSD2|A0A0K9QSD2_SPIOL Uncharacterized protein OS=Spinacia oleracea OX=3562 GN=SOVF_153530 PE=3 SV=1
TRINITY_DN118_c0_g2_i4	4643	0	131.05	0	0.87	0	0.58	10.1426	tr|A0A0K9RA69|A0A0K9RA69_SPIOL Uncharacterized protein OS=Spinacia oleracea OX=3562 GN=SOVF_096360 PE=3 SV=1
TRINITY_DN4045_c0_g1_i2	2440	0	129.97	0	1.7	0	1.13	10.1315	tr|A0A0K9QCZ8|A0A0K9QCZ8_SPIOL Uncharacterized protein (Fragment) OS=Spinacia oleracea OX=3562 GN=SOVF_193400 PE=4 SV=1
TRINITY_DN541_c0_g1_i1	7002	0	130.06	0	0.56	0	0.38	10.1315	tr|O64983|O64983_SPIOL Fructose-6-phosphate 2-kinase/fructose-2,6-bisphosphatase OS=Spinacia oleracea OX=3562 GN=SOVF_135300 PE=2 SV=1
TRINITY_DN7669_c0_g1_i2	5547	0	130.25	0	0.72	0	0.48	10.1315	tr|A0A0K9RPX2|A0A0K9RPX2_SPIOL Telomerase reverse transcriptase OS=Spinacia oleracea OX=3562 GN=SOVF_041310 PE=3 SV=1
TRINITY_DN210_c0_g1_i11	2265	0	129.39	0	1.84	0	1.22	10.1204	tr|A0A0K9RDK3|A0A0K9RDK3_SPIOL Pectinesterase OS=Spinacia oleracea OX=3562 GN=SOVF_081810 PE=3 SV=1
TRINITY_DN3960_c1_g1_i2	1770	0	128.88	0	2.4	0	1.6	10.1204	tr|A0A0J8B8J8|A0A0J8B8J8_BETVU Uncharacterized protein OS=Beta vulgaris subsp. vulgaris OX=3555 GN=BVRB_5g125590 PE=4 SV=1
TRINITY_DN4525_c1_g1_i4	1708	0	128.9	0	2.5	0	1.66	10.1204	tr|A0A0K9QUX2|A0A0K9QUX2_SPIOL Uncharacterized protein OS=Spinacia oleracea OX=3562 GN=SOVF_143870 PE=3 SV=1
TRINITY_DN6961_c0_g2_i9	2116	0	129.08	0	1.98	0	1.31	10.1204	tr|A0A0K9QR37|A0A0K9QR37_SPIOL Uncharacterized protein OS=Spinacia oleracea OX=3562 GN=SOVF_151380 PE=4 SV=1
TRINITY_DN7655_c0_g1_i4	2274	0	129.15	0	1.83	0	1.22	10.1204	tr|A0A0K9R1P5|A0A0K9R1P5_SPIOL Uncharacterized protein (Fragment) OS=Spinacia oleracea OX=3562 GN=SOVF_117030 PE=4 SV=1
TRINITY_DN8187_c0_g3_i2	2351	0	129.42	0	1.77	0	1.17	10.1204	tr|A0A0K9RS91|A0A0K9RS91_SPIOL Purple acid phosphatase OS=Spinacia oleracea OX=3562 GN=SOVF_041180 PE=3 SV=1
TRINITY_DN10161_c0_g1_i3	2815	0	128.31	0	1.44	0	0.96	10.1092	tr|A0A0K9R5A3|A0A0K9R5A3_SPIOL Uncharacterized protein OS=Spinacia oleracea OX=3562 GN=SOVF_104440 PE=4 SV=1
TRINITY_DN1110_c0_g1_i4	3495	0	128.11	0	1.14	0	0.76	10.1092	tr|A0A0K9QRU1|A0A0K9QRU1_SPIOL Uncharacterized protein OS=Spinacia oleracea OX=3562 GN=SOVF_148500 PE=3 SV=1
TRINITY_DN1264_c0_g1_i10	2666	0	128.04	0	1.53	0	1.01	10.1092	tr|A0A0K9QR83|A0A0K9QR83_SPIOL Uncharacterized protein OS=Spinacia oleracea OX=3562 GN=SOVF_150330 PE=4 SV=1
TRINITY_DN1906_c0_g1_i3	5864	0	127.95	0	0.67	0	0.44	10.1092	tr|A0A0K9RUF9|A0A0K9RUF9_SPIOL Uncharacterized protein OS=Spinacia oleracea OX=3562 GN=SOVF_033880 PE=3 SV=1
TRINITY_DN2115_c0_g1_i14	3377	0	128.03	0	1.19	0	0.79	10.1092	tr|A0A0K9RWX4|A0A0K9RWX4_SPIOL Uncharacterized protein OS=Spinacia oleracea OX=3562 GN=SOVF_019800 PE=4 SV=1
TRINITY_DN1242_c1_g1_i14	5109	0	127.49	0	0.77	0	0.51	10.0979	tr|A0A0K9RFJ3|A0A0K9RFJ3_SPIOL Uncharacterized protein OS=Spinacia oleracea OX=3562 GN=SOVF_076090 PE=4 SV=1
TRINITY_DN1492_c2_g1_i16	3812	0	127.47	0	1.04	0	0.69	10.0979	tr|A0A0J8BDJ9|A0A0J8BDJ9_BETVU Uncharacterized protein OS=Beta vulgaris subsp. vulgaris OX=3555 GN=BVRB_4g096410 PE=4 SV=1
TRINITY_DN1988_c0_g1_i6	3692	0	127.39	0	1.07	0	0.71	10.0979	tr|A0A0K9R0X6|A0A0K9R0X6_SPIOL Uncharacterized protein OS=Spinacia oleracea OX=3562 GN=SOVF_125820 PE=4 SV=1
TRINITY_DN2356_c0_g1_i3	3250	0	127.47	0	1.23	0	0.82	10.0979	tr|A0A0K9QV58|A0A0K9QV58_SPIOL Uncharacterized protein OS=Spinacia oleracea OX=3562 GN=SOVF_137810 PE=3 SV=1
TRINITY_DN279_c1_g1_i13	3274	0	126.89	0	1.21	0	0.81	10.0979	tr|A0A0K9RZZ0|A0A0K9RZZ0_SPIOL Uncharacterized protein OS=Spinacia oleracea OX=3562 GN=SOVF_009900 PE=3 SV=1
TRINITY_DN2882_c0_g1_i3	3046	0	127.38	0	1.32	0	0.88	10.0979	tr|A0A0K9R1Q6|A0A0K9R1Q6_SPIOL Uncharacterized protein OS=Spinacia oleracea OX=3562 GN=SOVF_116900 PE=3 SV=1
TRINITY_DN10664_c0_g2_i1	1071	0	125.85	0	4.2	0	2.79	10.0865	-
TRINITY_DN2510_c0_g1_i7	3416	0	125.42	0	1.15	0	0.76	10.075	tr|A0A0K9R829|A0A0K9R829_SPIOL Uncharacterized protein OS=Spinacia oleracea OX=3562 GN=SOVF_102700 PE=4 SV=1
TRINITY_DN4954_c0_g1_i2	619	0	125.49	0	8.53	0	5.68	10.075	tr|A0A0K9R589|A0A0K9R589_SPIOL Uncharacterized protein OS=Spinacia oleracea OX=3562 GN=SOVF_111580 PE=4 SV=1
TRINITY_DN7323_c0_g1_i3	1730	0	125.44	0	2.4	0	1.6	10.075	tr|A0A0K9RVA2|A0A0K9RVA2_SPIOL Uncharacterized protein OS=Spinacia oleracea OX=3562 GN=SOVF_024550 PE=4 SV=1
TRINITY_DN3037_c0_g1_i4	3665	0	123.85	0	1.05	0	0.7	10.0634	tr|A0A0K9RLQ8|A0A0K9RLQ8_SPIOL Uncharacterized protein OS=Spinacia oleracea OX=3562 GN=SOVF_057610 PE=3 SV=1
TRINITY_DN4173_c0_g1_i6	2754	0	123.52	0	1.42	0	0.95	10.0634	tr|A0A0K9QZ54|A0A0K9QZ54_SPIOL Uncharacterized protein OS=Spinacia oleracea OX=3562 GN=SOVF_131670 PE=4 SV=1
TRINITY_DN95_c0_g1_i5	2809	0	124.48	0	1.4	0	0.93	10.0634	tr|A0A0K9RB69|A0A0K9RB69_SPIOL Protein DETOXIFICATION OS=Spinacia oleracea OX=3562 GN=SOVF_092890 PE=3 SV=1
TRINITY_DN184_c1_g1_i2	2055	0	122.73	0	1.94	0	1.29	10.0518	tr|A0A1B2RWE0|A0A1B2RWE0_9CARY NAC transcription factor 38 OS=Haloxylon ammodendron OX=151230 PE=2 SV=1
TRINITY_DN2016_c1_g2_i11	672	0	122.89	0	7.45	0	4.96	10.0518	-
TRINITY_DN1250_c0_g1_i1	2002	0	122.1	0	1.99	0	1.32	10.04	tr|A0A0K9QIX2|A0A0K9QIX2_SPIOL Uncharacterized protein OS=Spinacia oleracea OX=3562 GN=SOVF_174070 PE=3 SV=1
TRINITY_DN1831_c0_g1_i1	787	0	122.21	0	5.99	0	3.99	10.04	tr|A0A0J8DWK0|A0A0J8DWK0_BETVU Uncharacterized protein OS=Beta vulgaris subsp. vulgaris OX=3555 GN=BVRB_010730 PE=4 SV=1
TRINITY_DN1962_c1_g1_i1	1579	0	122.39	0	2.59	0	1.73	10.04	tr|A0A0K9RCS5|A0A0K9RCS5_SPIOL Uncharacterized protein OS=Spinacia oleracea OX=3562 GN=SOVF_085970 PE=4 SV=1
TRINITY_DN2175_c0_g2_i3	3258	0	122.36	0	1.18	0	0.78	10.04	tr|A0A0K9QW99|A0A0K9QW99_SPIOL Uncharacterized protein OS=Spinacia oleracea OX=3562 GN=SOVF_134010 PE=4 SV=1
TRINITY_DN321_c3_g3_i1	424	0	122	0	15.01	0	9.99	10.04	-
TRINITY_DN4022_c0_g1_i3	849	0	122.27	0	5.44	0	3.62	10.04	tr|A0A0K9RP03|A0A0K9RP03_SPIOL Uncharacterized protein OS=Spinacia oleracea OX=3562 GN=SOVF_045010 PE=4 SV=1
TRINITY_DN12091_c0_g2_i16	3622	0	121.15	0	1.04	0	0.69	10.0281	tr|A0A0J8B9U9|A0A0J8B9U9_BETVU Uncharacterized protein OS=Beta vulgaris subsp. vulgaris OX=3555 GN=BVRB_8g201000 PE=4 SV=1
TRINITY_DN2127_c0_g1_i13	3147	0	120.81	0	1.21	0	0.8	10.0281	tr|A0A0K9QTE8|A0A0K9QTE8_SPIOL Uncharacterized protein OS=Spinacia oleracea OX=3562 GN=SOVF_143210 PE=3 SV=1
TRINITY_DN4244_c0_g1_i4	3442	0	121.26	0	1.1	0	0.73	10.0281	tr|A0A0K9R529|A0A0K9R529_SPIOL Uncharacterized protein OS=Spinacia oleracea OX=3562 GN=SOVF_106020 PE=4 SV=1
TRINITY_DN464_c0_g1_i3	3588	0.41	121.15	0	1.05	0	0.7	10.0281	tr|A0A0K9R9Y7|A0A0K9R9Y7_SPIOL Uncharacterized protein OS=Spinacia oleracea OX=3562 GN=SOVF_090120 PE=4 SV=1
TRINITY_DN617_c1_g1_i6	4138	0.02	121.32	0	0.91	0	0.6	10.0281	tr|A0A0K9QEM4|A0A0K9QEM4_SPIOL Uncharacterized protein OS=Spinacia oleracea OX=3562 GN=SOVF_193430 PE=4 SV=1
TRINITY_DN13781_c0_g1_i2	1971	0	119.3	0	1.97	0	1.31	10.0041	tr|A0A0K9RUZ6|A0A0K9RUZ6_SPIOL Uncharacterized protein OS=Spinacia oleracea OX=3562 GN=SOVF_025640 PE=4 SV=1
TRINITY_DN2528_c0_g1_i3	2762	0.16	119.23	0	1.37	0	0.91	10.0041	tr|A0A0K9RNN0|A0A0K9RNN0_SPIOL Uncharacterized protein OS=Spinacia oleracea OX=3562 GN=SOVF_046270 PE=4 SV=1
TRINITY_DN4589_c0_g1_i1	1376	0	119	0	2.95	0	1.96	10.0041	-
TRINITY_DN8794_c0_g1_i4	6833	0	119.43	0	0.53	0	0.35	10.0041	tr|A0A0K9QNJ4|A0A0K9QNJ4_SPIOL Uncharacterized protein OS=Spinacia oleracea OX=3562 GN=SOVF_159320 PE=3 SV=1
TRINITY_DN28886_c0_g1_i5	5913	0	117.75	0	0.61	0	0.4	9.99194	tr|F4NCG1|F4NCG1_BETVU Uncharacterized protein OS=Beta vulgaris subsp. vulgaris OX=3555 PE=4 SV=1
TRINITY_DN745_c0_g1_i5	2027	0	118.32	0	1.9	0	1.26	9.99194	tr|A0A0K9RXT9|A0A0K9RXT9_SPIOL Uncharacterized protein OS=Spinacia oleracea OX=3562 GN=SOVF_023120 PE=4 SV=1
TRINITY_DN1121_c0_g1_i2	1554	0	117.24	0	2.53	0	1.68	9.97968	tr|A0A0J8B1C6|A0A0J8B1C6_BETVU Proteasome subunit alpha type OS=Beta vulgaris subsp. vulgaris OX=3555 GN=BVRB_015080 PE=3 SV=1
TRINITY_DN11384_c0_g1_i6	3730	0	117.06	0	0.98	0	0.65	9.97968	tr|A0A0K9QC56|A0A0K9QC56_SPIOL Uncharacterized protein OS=Spinacia oleracea OX=3562 GN=SOVF_195700 PE=4 SV=1
TRINITY_DN11766_c0_g1_i2	2071	0	116.64	0	1.83	0	1.22	9.97968	tr|A7UGI6|A7UGI6_SPIOL Glutamine synthetase OS=Spinacia oleracea OX=3562 GN=GS1 PE=2 SV=1
TRINITY_DN489_c0_g1_i1	1581	0.03	116.99	0	2.48	0	1.65	9.97968	tr|A0A0K9RS48|A0A0K9RS48_SPIOL Uncharacterized protein (Fragment) OS=Spinacia oleracea OX=3562 GN=SOVF_041550 PE=4 SV=1
TRINITY_DN7485_c0_g1_i9	1553	0	115.88	0	2.5	0	1.67	9.9673	tr|A0A0K9RY23|A0A0K9RY23_SPIOL Uncharacterized protein OS=Spinacia oleracea OX=3562 GN=SOVF_016570 PE=3 SV=1
TRINITY_DN1260_c0_g1_i19	3654	0	114.78	0	0.98	0	0.65	9.95483	tr|A0A0K9RME7|A0A0K9RME7_SPIOL Uncharacterized protein OS=Spinacia oleracea OX=3562 GN=SOVF_056110 PE=4 SV=1
TRINITY_DN6308_c0_g1_i2	1132	0	115	0	3.59	0	2.39	9.95483	tr|E7BQD4|E7BQD4_SILLA Gag-pol polyprotein OS=Silene latifolia OX=37657 PE=4 SV=1
TRINITY_DN877_c1_g1_i2	1998	0	114.75	0	1.87	0	1.24	9.95483	tr|A0A0K9RT87|A0A0K9RT87_SPIOL 40S ribosomal protein SA OS=Spinacia oleracea OX=3562 GN=SOVF_031410 PE=3 SV=1
TRINITY_DN13678_c0_g1_i14	1921	0	113.55	0	1.93	0	1.29	9.94224	tr|A0A0K9QEJ0|A0A0K9QEJ0_SPIOL Uncharacterized protein OS=Spinacia oleracea OX=3562 GN=SOVF_188100 PE=4 SV=1
TRINITY_DN4231_c0_g1_i1	2803	0.1	113.52	0	1.28	0	0.85	9.94224	tr|A0A0K9QK79|A0A0K9QK79_SPIOL Auxin-responsive protein OS=Spinacia oleracea OX=3562 GN=SOVF_169970 PE=3 SV=1
TRINITY_DN4672_c0_g1_i7	981	0	114.34	0	4.24	0	2.82	9.94224	tr|A2I5E5|A2I5E5_BETVU Retrotransposon protein OS=Beta vulgaris OX=161934 PE=4 SV=1
TRINITY_DN5551_c0_g1_i1	4685	0	114.26	0	0.75	0	0.5	9.94224	tr|A0A0K9QN84|A0A0K9QN84_SPIOL Uncharacterized protein OS=Spinacia oleracea OX=3562 GN=SOVF_166170 PE=4 SV=1
TRINITY_DN3041_c0_g1_i3	923	0	113.04	0	4.52	0	3.01	9.92954	tr|A0A0K9QE53|A0A0K9QE53_SPIOL Uncharacterized protein OS=Spinacia oleracea OX=3562 GN=SOVF_189320 PE=4 SV=1
TRINITY_DN3315_c0_g1_i12	3555	0	113.39	0	0.99	0	0.66	9.92954	tr|A0A0K9RRM0|A0A0K9RRM0_SPIOL Uncharacterized protein OS=Spinacia oleracea OX=3562 GN=SOVF_042110 PE=4 SV=1
TRINITY_DN3952_c1_g1_i5	3123	0	112.88	0	1.14	0	0.76	9.92954	tr|A0A0K9QRV2|A0A0K9QRV2_SPIOL Uncharacterized protein OS=Spinacia oleracea OX=3562 GN=SOVF_153710 PE=3 SV=1
TRINITY_DN420_c0_g1_i4	1374	0	113.49	0	2.82	0	1.88	9.92954	tr|A0A0K9RGN0|A0A0K9RGN0_SPIOL Uncharacterized protein OS=Spinacia oleracea OX=3562 GN=SOVF_068880 PE=4 SV=1
TRINITY_DN490_c0_g1_i5	548	0	113.26	0	9.2	0	6.12	9.92954	tr|A0A0K9QUB3|A0A0K9QUB3_SPIOL Uncharacterized protein OS=Spinacia oleracea OX=3562 GN=SOVF_140260 PE=4 SV=1
TRINITY_DN5179_c1_g2_i11	3106	0	112.83	0	1.14	0	0.76	9.92954	tr|A0A0K9RLG8|A0A0K9RLG8_SPIOL Uncharacterized protein OS=Spinacia oleracea OX=3562 GN=SOVF_052820 PE=4 SV=1
TRINITY_DN6713_c0_g1_i7	3917	0	113.24	0	0.9	0	0.6	9.92954	tr|A0A0K9QDH7|A0A0K9QDH7_SPIOL Uncharacterized protein OS=Spinacia oleracea OX=3562 GN=SOVF_191480 PE=4 SV=1
TRINITY_DN879_c0_g3_i2	824	0	113.31	0	5.24	0	3.48	9.92954	-
TRINITY_DN196_c1_g1_i11	1899	0.06	112.03	0	1.93	0	1.29	9.91673	tr|A0A0J8DWP2|A0A0J8DWP2_BETVU Uncharacterized protein OS=Beta vulgaris subsp. vulgaris OX=3555 GN=BVRB_009790 PE=3 SV=1
TRINITY_DN5618_c0_g2_i2	2975	0	111.69	0	1.18	0	0.79	9.91673	tr|A0A0K9Q9A8|A0A0K9Q9A8_SPIOL Uncharacterized protein OS=Spinacia oleracea OX=3562 GN=SOVF_205350 PE=4 SV=1
TRINITY_DN21028_c0_g1_i1	3638	0	111	0	0.95	0	0.63	9.9038	tr|A0A0K9QD63|A0A0K9QD63_SPIOL Uncharacterized protein (Fragment) OS=Spinacia oleracea OX=3562 GN=SOVF_198060 PE=4 SV=1
TRINITY_DN611_c0_g1_i6	4728	0	111.14	0	0.72	0	0.48	9.9038	tr|A0A0K9R052|A0A0K9R052_SPIOL Uncharacterized protein OS=Spinacia oleracea OX=3562 GN=SOVF_126980 PE=4 SV=1
TRINITY_DN11631_c1_g1_i18	4314	0.14	110.09	0	0.79	0	0.52	9.89076	tr|A0A0K9R978|A0A0K9R978_SPIOL WAT1-related protein OS=Spinacia oleracea OX=3562 GN=SOVF_092730 PE=3 SV=1
TRINITY_DN1228_c0_g2_i1	334	0	110.38	0	21.46	0	14.28	9.89076	tr|A0A0K9RS76|A0A0K9RS76_SPIOL AP-4 complex subunit epsilon OS=Spinacia oleracea OX=3562 GN=SOVF_034260 PE=3 SV=1
TRINITY_DN1553_c1_g1_i5	2838	0	110.3	0	1.23	0	0.82	9.89076	tr|A0A0K9QM59|A0A0K9QM59_SPIOL Uncharacterized protein OS=Spinacia oleracea OX=3562 GN=SOVF_163460 PE=4 SV=1
TRINITY_DN380_c1_g1_i13	3071	0	109.67	0	1.12	0	0.75	9.89076	tr|A0A0K9Q9U9|A0A0K9Q9U9_SPIOL Potassium transporter OS=Spinacia oleracea OX=3562 GN=SOVF_203260 PE=3 SV=1
TRINITY_DN6669_c0_g2_i2	1505	0	110.05	0	2.46	0	1.64	9.89076	tr|A0A0K9RSY1|A0A0K9RSY1_SPIOL Uncharacterized protein OS=Spinacia oleracea OX=3562 GN=SOVF_032470 PE=4 SV=1
TRINITY_DN779_c0_g1_i14	7508	0	110.37	0	0.45	0	0.3	9.89076	tr|A0A0K9R633|A0A0K9R633_SPIOL Uncharacterized protein OS=Spinacia oleracea OX=3562 GN=SOVF_107700 PE=4 SV=1
TRINITY_DN1000_c0_g1_i13	6701	0	108.92	0	0.49	0	0.33	9.8776	tr|A0A0K9RBD5|A0A0K9RBD5_SPIOL Uncharacterized protein OS=Spinacia oleracea OX=3562 GN=SOVF_085770 PE=4 SV=1
TRINITY_DN2758_c0_g1_i1	396	0	109.1	0	15.17	0	10.1	9.8776	tr|A0A0K9QNQ7|A0A0K9QNQ7_SPIOL RING-type E3 ubiquitin transferase OS=Spinacia oleracea OX=3562 GN=SOVF_158780 PE=4 SV=1
TRINITY_DN3731_c0_g1_i9	2734	0	109.08	0	1.26	0	0.84	9.8776	tr|A0A0K9RZY6|A0A0K9RZY6_SPIOL Uncharacterized protein OS=Spinacia oleracea OX=3562 GN=SOVF_009670 PE=4 SV=1
TRINITY_DN6453_c0_g1_i6	4118	0	109.45	0	0.82	0	0.55	9.8776	tr|A0A0K9S0R3|A0A0K9S0R3_SPIOL Uncharacterized protein OS=Spinacia oleracea OX=3562 GN=SOVF_007390 PE=4 SV=1
TRINITY_DN820_c0_g1_i1	3168	0.05	108.58	0	1.08	0	0.72	9.8776	tr|A0A0K9R9E9|A0A0K9R9E9_SPIOL U2 snRNP auxiliary factor large subunit OS=Spinacia oleracea OX=3562 GN=SOVF_092150 PE=3 SV=1
TRINITY_DN10483_c0_g2_i5	3028	0	108.31	0	1.13	0	0.75	9.86432	tr|A0A0K9RQD1|A0A0K9RQD1_SPIOL Uncharacterized protein OS=Spinacia oleracea OX=3562 GN=SOVF_041040 PE=4 SV=1
TRINITY_DN1472_c1_g1_i5	3621	0	107.95	0	0.93	0	0.62	9.86432	tr|A0A0K9QNL4|A0A0K9QNL4_SPIOL Uncharacterized protein OS=Spinacia oleracea OX=3562 GN=SOVF_159180 PE=4 SV=1
TRINITY_DN243_c1_g1_i6	2266	0	107.52	0	1.53	0	1.02	9.86432	tr|A0A0K9RA29|A0A0K9RA29_SPIOL Uncharacterized protein OS=Spinacia oleracea OX=3562 GN=SOVF_089930 PE=4 SV=1
TRINITY_DN2930_c0_g1_i17	3720	0	107.97	0	0.9	0	0.6	9.86432	tr|A0A0K9RCW9|A0A0K9RCW9_SPIOL Inositol-pentakisphosphate 2-kinase OS=Spinacia oleracea OX=3562 GN=SOVF_080660 PE=4 SV=1
TRINITY_DN3132_c0_g1_i3	1499	0	107.74	0	2.42	0	1.61	9.86432	tr|A0A0K9QRV8|A0A0K9QRV8_SPIOL Uncharacterized protein (Fragment) OS=Spinacia oleracea OX=3562 GN=SOVF_152700 PE=4 SV=1
TRINITY_DN3330_c0_g1_i9	1451	0	107.84	0	2.52	0	1.67	9.86432	-
TRINITY_DN4847_c0_g1_i3	2680	0	107.5	0	1.27	0	0.85	9.86432	tr|A0A0K9R522|A0A0K9R522_SPIOL Uncharacterized protein OS=Spinacia oleracea OX=3562 GN=SOVF_111120 PE=4 SV=1
TRINITY_DN5117_c0_g2_i7	1529	0	107.93	0	2.37	0	1.58	9.86432	tr|A0A0K9QDS3|A0A0K9QDS3_SPIOL Uncharacterized protein (Fragment) OS=Spinacia oleracea OX=3562 GN=SOVF_190600 PE=4 SV=1
TRINITY_DN6764_c0_g1_i1	854	0	108.07	0	4.77	0	3.17	9.86432	tr|A0A0J8B4G7|A0A0J8B4G7_BETVU Uncharacterized protein OS=Beta vulgaris subsp. vulgaris OX=3555 GN=BVRB_015880 PE=4 SV=1
TRINITY_DN2643_c2_g2_i5	3628	0	106.98	0	0.92	0	0.61	9.85091	tr|A0A0K9R3N3|A0A0K9R3N3_SPIOL Uncharacterized protein OS=Spinacia oleracea OX=3562 GN=SOVF_115460 PE=4 SV=1
TRINITY_DN5479_c0_g2_i3	2629	0	106.56	0	1.29	0	0.86	9.85091	tr|A0A0J8E042|A0A0J8E042_BETVU Auxin-responsive protein OS=Beta vulgaris subsp. vulgaris OX=3555 GN=BVRB_9g224630 PE=3 SV=1
TRINITY_DN5894_c0_g1_i3	1044	0	106.65	0	3.67	0	2.44	9.85091	-
TRINITY_DN7207_c0_g1_i3	3105	0	106.87	0	1.08	0	0.72	9.85091	tr|A0A0K9QJT0|A0A0K9QJT0_SPIOL Lipoxygenase OS=Spinacia oleracea OX=3562 GN=SOVF_177540 PE=3 SV=1
TRINITY_DN8014_c0_g1_i2	2213	0	106.69	0	1.55	0	1.03	9.85091	-
TRINITY_DN1993_c1_g1_i2	717	0	106	0	5.88	0	3.91	9.83738	-
TRINITY_DN2171_c0_g1_i5	3602	0	106.19	0	0.92	0	0.61	9.83738	tr|A0A0K9Q9C2|A0A0K9Q9C2_SPIOL Uncharacterized protein OS=Spinacia oleracea OX=3562 GN=SOVF_204920 PE=4 SV=1
TRINITY_DN4045_c0_g1_i25	2958	0	106.22	0	1.13	0	0.75	9.83738	tr|A0A0K9QCZ8|A0A0K9QCZ8_SPIOL Uncharacterized protein (Fragment) OS=Spinacia oleracea OX=3562 GN=SOVF_193400 PE=4 SV=1
TRINITY_DN4241_c0_g2_i4	4664	0	104.63	0	0.69	0	0.46	9.82372	tr|A0A0K9R226|A0A0K9R226_SPIOL Uncharacterized protein OS=Spinacia oleracea OX=3562 GN=SOVF_115440 PE=3 SV=1
TRINITY_DN5780_c1_g1_i5	2817	0	104.84	0	1.18	0	0.78	9.82372	tr|A0A0K9R2J5|A0A0K9R2J5_SPIOL Uncharacterized protein (Fragment) OS=Spinacia oleracea OX=3562 GN=SOVF_114190 PE=4 SV=1
TRINITY_DN1353_c1_g1_i13	2125	0.08	103.76	0	1.58	0	1.05	9.80993	tr|A0A0K9REV3|A0A0K9REV3_SPIOL Uncharacterized protein OS=Spinacia oleracea OX=3562 GN=SOVF_074670 PE=4 SV=1
TRINITY_DN1487_c0_g2_i7	5923	0	103.53	0	0.53	0	0.35	9.80993	tr|A0A0K9RFV2|A0A0K9RFV2_SPIOL Uncharacterized protein OS=Spinacia oleracea OX=3562 GN=SOVF_071440 PE=4 SV=1
TRINITY_DN7114_c0_g2_i1	4862	0	103.61	0	0.65	0	0.44	9.80993	tr|E2DMZ5|E2DMZ5_BETVU Uncharacterized protein OS=Beta vulgaris OX=161934 PE=4 SV=1
TRINITY_DN7748_c1_g4_i6	3424	0	104	0	0.95	0	0.63	9.80993	tr|A0A0K9QN74|A0A0K9QN74_SPIOL Uncharacterized protein OS=Spinacia oleracea OX=3562 GN=SOVF_160440 PE=3 SV=1
TRINITY_DN8753_c0_g1_i2	592	0	103.61	0	7.51	0	5	9.80993	-
TRINITY_DN12237_c0_g4_i8	2357	0	102.77	0	1.4	0	0.93	9.79601	tr|A0A0K9QH21|A0A0K9QH21_SPIOL Uncharacterized protein OS=Spinacia oleracea OX=3562 GN=SOVF_180330 PE=4 SV=1
TRINITY_DN5408_c0_g1_i4	697	0	102.73	0	5.92	0	3.94	9.79601	-
TRINITY_DN7053_c1_g1_i2	472	0	102.63	0	10.54	0	7.01	9.79601	-
TRINITY_DN1707_c0_g2_i2	2505	0	101.58	0	1.29	0	0.86	9.78195	tr|A0A0K9RID8|A0A0K9RID8_SPIOL Kinesin-like protein OS=Spinacia oleracea OX=3562 GN=SOVF_068570 PE=3 SV=1
TRINITY_DN2173_c0_g1_i3	540	0	101.67	0	8.45	0	5.62	9.78195	tr|A0A0K9RB07|A0A0K9RB07_SPIOL Uncharacterized protein OS=Spinacia oleracea OX=3562 GN=SOVF_091410 PE=4 SV=1
TRINITY_DN2645_c0_g1_i26	9340	0.4	101.53	0	0.33	0	0.22	9.78195	tr|E2DMZ5|E2DMZ5_BETVU Uncharacterized protein OS=Beta vulgaris OX=161934 PE=4 SV=1
TRINITY_DN3498_c0_g1_i3	457	0	101.77	0	11.02	0	7.33	9.78195	-
TRINITY_DN515_c0_g1_i9	2317	0	102.23	0	1.42	0	0.94	9.78195	tr|A0A0K9QH90|A0A0K9QH90_SPIOL Uncharacterized protein OS=Spinacia oleracea OX=3562 GN=SOVF_185340 PE=4 SV=1
TRINITY_DN21245_c0_g1_i9	2512	0	101.35	0	1.29	0	0.86	9.76775	tr|A0A0K9R0P0|A0A0K9R0P0_SPIOL Protein DETOXIFICATION OS=Spinacia oleracea OX=3562 GN=SOVF_125340 PE=3 SV=1
TRINITY_DN2149_c0_g1_i17	3588	0	101.14	0	0.88	0	0.58	9.76775	tr|A0A0K9RFE8|A0A0K9RFE8_SPIOL Uncharacterized protein OS=Spinacia oleracea OX=3562 GN=SOVF_073040 PE=4 SV=1
TRINITY_DN2282_c0_g1_i5	3230	0	100.87	0	0.98	0	0.65	9.76775	tr|A0A0K9RDD4|A0A0K9RDD4_SPIOL Uncharacterized protein OS=Spinacia oleracea OX=3562 GN=SOVF_085520 PE=4 SV=1
TRINITY_DN2578_c0_g1_i13	2474	0	100.76	0	1.3	0	0.87	9.76775	tr|A0A0K9RX16|A0A0K9RX16_SPIOL Uncharacterized protein OS=Spinacia oleracea OX=3562 GN=SOVF_024480 PE=4 SV=1
TRINITY_DN6303_c1_g1_i17	1142	0	101.43	0	3.13	0	2.08	9.76775	tr|A0A0K9RCV1|A0A0K9RCV1_SPIOL Protein yippee-like OS=Spinacia oleracea OX=3562 GN=SOVF_081200 PE=3 SV=1
TRINITY_DN6_c0_g1_i5	2705	0	100.56	0	1.18	0	0.78	9.76775	tr|A0A0K9RA58|A0A0K9RA58_SPIOL Uncharacterized protein OS=Spinacia oleracea OX=3562 GN=SOVF_089660 PE=4 SV=1
TRINITY_DN10245_c1_g2_i2	1713	0	99.98	0	1.93	0	1.29	9.75341	-
TRINITY_DN2283_c0_g1_i2	995	0	100.39	0	3.66	0	2.44	9.75341	-
TRINITY_DN3216_c0_g1_i2	2060	0.36	99.88	0.01	1.57	0	1.05	9.75341	tr|A0A0K9RFD3|A0A0K9RFD3_SPIOL Uncharacterized protein OS=Spinacia oleracea OX=3562 GN=SOVF_072740 PE=3 SV=1
TRINITY_DN364_c0_g1_i5	2963	0.07	100.22	0	1.07	0	0.71	9.75341	tr|A0A0K9Q7C4|A0A0K9Q7C4_SPIOL Uncharacterized protein OS=Spinacia oleracea OX=3562 GN=SOVF_212350 PE=4 SV=1
TRINITY_DN3838_c0_g1_i2	2022	0	99.5	0	1.6	0	1.07	9.75341	tr|A0A0K9RCI7|A0A0K9RCI7_SPIOL Uncharacterized protein OS=Spinacia oleracea OX=3562 GN=SOVF_088260 PE=4 SV=1
TRINITY_DN6573_c1_g1_i6	3521	0	100.34	0	0.89	0	0.59	9.75341	tr|J3SIC7|J3SIC7_BETVU CC-NBS-LRR type resistance protein OS=Beta vulgaris subsp. vulgaris OX=3555 PE=3 SV=1
TRINITY_DN9259_c1_g1_i21	2882	0	100.17	0	1.1	0	0.73	9.75341	tr|A0A0K9R0Z1|A0A0K9R0Z1_SPIOL Uncharacterized protein OS=Spinacia oleracea OX=3562 GN=SOVF_119100 PE=4 SV=1
TRINITY_DN95_c0_g1_i10	2405	0	99.83	0	1.33	0	0.88	9.75341	tr|A0A0K9RB69|A0A0K9RB69_SPIOL Protein DETOXIFICATION OS=Spinacia oleracea OX=3562 GN=SOVF_092890 PE=3 SV=1
TRINITY_DN10360_c0_g1_i2	613	0	98.56	0	6.79	0	4.52	9.73893	-
TRINITY_DN4727_c0_g1_i18	2494	0	98.89	0	1.27	0	0.84	9.73893	tr|A0A0K9RHK7|A0A0K9RHK7_SPIOL Uncharacterized protein OS=Spinacia oleracea OX=3562 GN=SOVF_065790 PE=4 SV=1
TRINITY_DN7841_c1_g3_i1	524	0	99	0	8.61	0	5.73	9.73893	-
TRINITY_DN10956_c0_g1_i8	2489	0	98.14	0	1.26	0	0.84	9.7243	tr|A0A0K9RYD2|A0A0K9RYD2_SPIOL Uncharacterized protein OS=Spinacia oleracea OX=3562 GN=SOVF_014610 PE=4 SV=1
TRINITY_DN1923_c0_g1_i1	2353	0	98.2	0	1.34	0	0.89	9.7243	tr|A0A0K9RWB7|A0A0K9RWB7_SPIOL Uncharacterized protein OS=Spinacia oleracea OX=3562 GN=SOVF_020570 PE=3 SV=1
TRINITY_DN5996_c0_g1_i1	4454	0	97.86	0	0.68	0	0.45	9.7243	tr|A0A0K9R2T7|A0A0K9R2T7_SPIOL Uncharacterized protein OS=Spinacia oleracea OX=3562 GN=SOVF_112860 PE=4 SV=1
TRINITY_DN101_c0_g1_i1	4351	0	97.14	0	0.69	0	0.46	9.70952	tr|A0A0K9R319|A0A0K9R319_SPIOL Uncharacterized protein (Fragment) OS=Spinacia oleracea OX=3562 GN=SOVF_119030 PE=4 SV=1
TRINITY_DN1472_c0_g1_i2	3476	0	97.26	0	0.87	0	0.58	9.70952	tr|A0A0K9RDR6|A0A0K9RDR6_SPIOL Urease OS=Spinacia oleracea OX=3562 GN=SOVF_078280 PE=3 SV=1
TRINITY_DN2349_c0_g2_i2	4211	0	97.32	0	0.71	0	0.48	9.70952	tr|A0A0K9RQT7|A0A0K9RQT7_SPIOL Uncharacterized protein OS=Spinacia oleracea OX=3562 GN=SOVF_039520 PE=4 SV=1
TRINITY_DN788_c0_g1_i6	5577	0	97.16	0	0.53	0	0.35	9.70952	tr|A0A0K9RBS9|A0A0K9RBS9_SPIOL Uncharacterized protein OS=Spinacia oleracea OX=3562 GN=SOVF_088760 PE=4 SV=1
TRINITY_DN1376_c1_g1_i6	773	0	95.53	0	4.8	0	3.19	9.69459	-
TRINITY_DN17662_c0_g1_i13	4047	0.25	96.42	0	0.74	0	0.49	9.69459	tr|A0A0K9Q769|A0A0K9Q769_SPIOL Uncharacterized protein OS=Spinacia oleracea OX=3562 GN=SOVF_213340 PE=4 SV=1
TRINITY_DN19284_c0_g5_i1	1067	0	96	0	3.21	0	2.14	9.69459	tr|A0A0K9RRW7|A0A0K9RRW7_SPIOL Uncharacterized protein OS=Spinacia oleracea OX=3562 GN=SOVF_035310 PE=4 SV=1
TRINITY_DN3184_c0_g1_i8	2018	0	95.78	0	1.54	0	1.03	9.69459	tr|E7BQD4|E7BQD4_SILLA Gag-pol polyprotein OS=Silene latifolia OX=37657 PE=4 SV=1
TRINITY_DN5424_c0_g1_i17	1872	0	96.23	0	1.69	0	1.12	9.69459	tr|A0A0K9QBC8|A0A0K9QBC8_SPIOL Uncharacterized protein (Fragment) OS=Spinacia oleracea OX=3562 GN=SOVF_203750 PE=4 SV=1
TRINITY_DN6_c0_g1_i6	2547	0	96.21	0	1.2	0	0.8	9.69459	tr|A0A0K9RA58|A0A0K9RA58_SPIOL Uncharacterized protein OS=Spinacia oleracea OX=3562 GN=SOVF_089660 PE=4 SV=1
TRINITY_DN8410_c0_g1_i3	2242	0	95.96	0	1.38	0	0.92	9.69459	tr|A0A0K9R9N9|A0A0K9R9N9_SPIOL Uncharacterized protein OS=Spinacia oleracea OX=3562 GN=SOVF_095850 PE=4 SV=1
TRINITY_DN18137_c0_g1_i2	305	1	809.29	0.23	192.22	0.16	127.9	9.68703	tr|A0A0K9QG63|A0A0K9QG63_SPIOL Uncharacterized protein OS=Spinacia oleracea OX=3562 GN=SOVF_182420 PE=4 SV=1
TRINITY_DN3488_c1_g1_i6	2293	0.08	95.18	0	1.33	0	0.89	9.6795	tr|A0A0K9RJE0|A0A0K9RJE0_SPIOL Pectinesterase OS=Spinacia oleracea OX=3562 GN=SOVF_060080 PE=4 SV=1
TRINITY_DN3659_c0_g1_i3	2581	0	94.61	0	1.17	0	0.78	9.6795	tr|A0A0K9QCX7|A0A0K9QCX7_SPIOL Uncharacterized protein OS=Spinacia oleracea OX=3562 GN=SOVF_200160 PE=4 SV=1
TRINITY_DN3731_c0_g1_i3	1312	0	94.95	0	2.49	0	1.66	9.6795	tr|A0A0K9RZY6|A0A0K9RZY6_SPIOL Uncharacterized protein OS=Spinacia oleracea OX=3562 GN=SOVF_009670 PE=4 SV=1
TRINITY_DN7323_c0_g1_i4	3326	0	94.95	0	0.89	0	0.59	9.6795	tr|A0A0K9RVA2|A0A0K9RVA2_SPIOL Uncharacterized protein OS=Spinacia oleracea OX=3562 GN=SOVF_024550 PE=4 SV=1
TRINITY_DN11988_c2_g1_i3	2757	0	94	0	1.08	0	0.72	9.66425	-
TRINITY_DN2236_c0_g1_i14	1517	0	93.92	0	2.08	0	1.39	9.66425	tr|A0A0K9QMK8|A0A0K9QMK8_SPIOL Uncharacterized protein OS=Spinacia oleracea OX=3562 GN=SOVF_168510 PE=4 SV=1
TRINITY_DN3692_c0_g1_i4	1508	0	94.14	0	2.1	0	1.4	9.66425	-
TRINITY_DN3716_c0_g2_i3	892	0	93.87	0	3.92	0	2.61	9.66425	-
TRINITY_DN4332_c0_g1_i14	4003	0	93.5	0	0.72	0	0.48	9.66425	tr|A0A0K9S030|A0A0K9S030_SPIOL Uncharacterized protein OS=Spinacia oleracea OX=3562 GN=SOVF_009830 PE=4 SV=1
TRINITY_DN6434_c1_g2_i7	3463	0	94.28	0	0.85	0	0.57	9.66425	tr|A0A0K9Q8R1|A0A0K9Q8R1_SPIOL Aldehyde dehydrogenase OS=Spinacia oleracea OX=3562 GN=SOVF_212440 PE=3 SV=1
TRINITY_DN6662_c0_g1_i2	2227	7.87	5658.12	0.11	81.89	0.08	54.49	9.65039	tr|A0A0G2URI4|A0A0G2URI4_AMACR Cytochrome P450 76AD1-like protein (Fragment) OS=Amaranthus cruentus OX=117272 PE=2 SV=1
TRINITY_DN15083_c0_g2_i1	1566	0	92.64	0	1.98	0	1.32	9.64884	-
TRINITY_DN1718_c0_g1_i6	2126	0	93	0	1.42	0	0.94	9.64884	tr|A0A0J8B3X6|A0A0J8B3X6_BETVU Uncharacterized protein OS=Beta vulgaris subsp. vulgaris OX=3555 GN=BVRB_003990 PE=3 SV=1
TRINITY_DN17621_c0_g2_i10	3039	0	93.37	0	0.97	0	0.64	9.64884	tr|A0A0K9QAY1|A0A0K9QAY1_SPIOL Uncharacterized protein OS=Spinacia oleracea OX=3562 GN=SOVF_206980 PE=4 SV=1
TRINITY_DN3179_c1_g1_i8	4007	0	92.72	0	0.72	0	0.48	9.64884	tr|A0A0K9R8W1|A0A0K9R8W1_SPIOL Uncharacterized protein OS=Spinacia oleracea OX=3562 GN=SOVF_093700 PE=3 SV=1
TRINITY_DN539_c0_g1_i10	3464	0	93.49	0	0.84	0	0.56	9.64884	tr|A0A0K9QLX0|A0A0K9QLX0_SPIOL Uncharacterized protein OS=Spinacia oleracea OX=3562 GN=SOVF_164210 PE=4 SV=1
TRINITY_DN1190_c0_g1_i13	4083	0	91.99	0	0.7	0	0.46	9.63326	tr|A0A0K9QL42|A0A0K9QL42_SPIOL Uncharacterized protein OS=Spinacia oleracea OX=3562 GN=SOVF_166780 PE=4 SV=1
TRINITY_DN12242_c0_g3_i1	1472	0	92.45	0	2.12	0	1.41	9.63326	tr|A0A0K9RWD3|A0A0K9RWD3_SPIOL Uncharacterized protein OS=Spinacia oleracea OX=3562 GN=SOVF_020680 PE=4 SV=1
TRINITY_DN1522_c0_g1_i1	1178	0	92	0	2.74	0	1.82	9.63326	tr|A0A0K9QG33|A0A0K9QG33_SPIOL Uncharacterized protein OS=Spinacia oleracea OX=3562 GN=SOVF_183170 PE=3 SV=1
TRINITY_DN4332_c0_g1_i8	3060	0	92.25	0	0.95	0	0.63	9.63326	tr|A0A0K9S030|A0A0K9S030_SPIOL Uncharacterized protein OS=Spinacia oleracea OX=3562 GN=SOVF_009830 PE=4 SV=1
TRINITY_DN6244_c0_g1_i2	635	0	92.08	0	6.04	0	4.02	9.63326	-
TRINITY_DN8454_c0_g1_i5	3566	0.01	92.36	0	0.81	0	0.54	9.63326	tr|A0A0K9QDR4|A0A0K9QDR4_SPIOL Uncharacterized protein OS=Spinacia oleracea OX=3562 GN=SOVF_190640 PE=4 SV=1
TRINITY_DN3292_c0_g2_i5	4290	0	90.58	0	0.65	0	0.43	9.61751	tr|A0A0K9QSX4|A0A0K9QSX4_SPIOL Uncharacterized protein OS=Spinacia oleracea OX=3562 GN=SOVF_144720 PE=4 SV=1
TRINITY_DN388_c0_g1_i6	2176	0	91.21	0	1.35	0	0.9	9.61751	tr|A0A0K9RD07|A0A0K9RD07_SPIOL Uncharacterized protein OS=Spinacia oleracea OX=3562 GN=SOVF_085260 PE=3 SV=1
TRINITY_DN6866_c0_g1_i1	2839	0	90.95	0	1.01	0	0.67	9.61751	tr|A0A0K9QW40|A0A0K9QW40_SPIOL Uncharacterized protein OS=Spinacia oleracea OX=3562 GN=SOVF_141500 PE=4 SV=1
TRINITY_DN69706_c0_g1_i2	1788	0	91	0	1.68	0	1.12	9.61751	tr|F4NCG3|F4NCG3_BETVU Uncharacterized protein OS=Beta vulgaris subsp. vulgaris OX=3555 PE=4 SV=1
TRINITY_DN714_c0_g2_i2	1106	0	90.92	0	2.92	0	1.94	9.61751	tr|A0A0K9RIL5|A0A0K9RIL5_SPIOL Uncharacterized protein OS=Spinacia oleracea OX=3562 GN=SOVF_062580 PE=4 SV=1
TRINITY_DN9731_c0_g2_i4	672	0	91	0	5.51	0	3.67	9.61751	-
TRINITY_DN1530_c0_g2_i2	1827	0	89.8	0	1.62	0	1.08	9.60159	-
TRINITY_DN2180_c0_g1_i2	354	0	90.25	0	15.57	0	10.36	9.60159	-
TRINITY_DN388_c1_g2_i3	1507	0	89.51	0	2	0	1.33	9.60159	tr|A0A0J8E0P8|A0A0J8E0P8_BETVU Uncharacterized protein OS=Beta vulgaris subsp. vulgaris OX=3555 GN=BVRB_8g200670 PE=4 SV=1
TRINITY_DN5161_c0_g1_i1	1040	0	89.89	0	3.11	0	2.07	9.60159	tr|A0A0K9RW02|A0A0K9RW02_SPIOL Pectin acetylesterase OS=Spinacia oleracea OX=3562 GN=SOVF_022510 PE=3 SV=1
TRINITY_DN12946_c0_g2_i1	3182	0	89	0	0.88	0	0.58	9.58549	-
TRINITY_DN16797_c0_g1_i14	1630	0.01	88.56	0	1.81	0	1.2	9.58549	tr|A0A0K9R932|A0A0K9R932_SPIOL Uncharacterized protein (Fragment) OS=Spinacia oleracea OX=3562 GN=SOVF_097830 PE=4 SV=1
TRINITY_DN2225_c1_g1_i16	2676	0	88.76	0	1.05	0	0.7	9.58549	tr|A0A0K9R3M5|A0A0K9R3M5_SPIOL Uncharacterized protein OS=Spinacia oleracea OX=3562 GN=SOVF_117090 PE=4 SV=1
TRINITY_DN2892_c0_g1_i1	4203	0	88.74	0	0.65	0	0.43	9.58549	tr|A0A0K9QWK9|A0A0K9QWK9_SPIOL Phosphoglycolate phosphatase OS=Spinacia oleracea OX=3562 GN=SOVF_133030 PE=3 SV=1
TRINITY_DN3833_c0_g1_i15	3554	0	89.02	0	0.78	0	0.52	9.58549	tr|A0A0K9QU28|A0A0K9QU28_SPIOL Hexosyltransferase OS=Spinacia oleracea OX=3562 GN=SOVF_141400 PE=3 SV=1
TRINITY_DN5820_c0_g2_i4	3607	0	88.72	0	0.77	0	0.51	9.58549	tr|A0A0K9RI29|A0A0K9RI29_SPIOL Uncharacterized protein OS=Spinacia oleracea OX=3562 GN=SOVF_064200 PE=4 SV=1
TRINITY_DN6854_c0_g1_i4	3285	0	89.05	0	0.85	0	0.56	9.58549	tr|A0A0K9RNB4|A0A0K9RNB4_SPIOL Uncharacterized protein OS=Spinacia oleracea OX=3562 GN=SOVF_047110 PE=4 SV=1
TRINITY_DN11724_c0_g1_i10	4314	0	87.92	0	0.63	0	0.42	9.56921	tr|A0A0K9QAD8|A0A0K9QAD8_SPIOL Uncharacterized protein OS=Spinacia oleracea OX=3562 GN=SOVF_201630 PE=4 SV=1
TRINITY_DN11724_c0_g1_i11	2133	0	88.35	0	1.34	0	0.89	9.56921	tr|A0A0K9QAD8|A0A0K9QAD8_SPIOL Uncharacterized protein OS=Spinacia oleracea OX=3562 GN=SOVF_201630 PE=4 SV=1
TRINITY_DN1272_c1_g1_i20	204	0	87.77	0	66.89	0	44.51	9.56921	-
TRINITY_DN1486_c0_g1_i16	2635	0	88.07	0	1.06	0	0.71	9.56921	tr|A0A0K9QE44|A0A0K9QE44_SPIOL Uncharacterized protein OS=Spinacia oleracea OX=3562 GN=SOVF_196350 PE=4 SV=1
TRINITY_DN3009_c0_g1_i6	2143	0	87.92	0	1.33	0	0.88	9.56921	tr|A0A0K9R0Z2|A0A0K9R0Z2_SPIOL Uncharacterized protein OS=Spinacia oleracea OX=3562 GN=SOVF_118940 PE=4 SV=1
TRINITY_DN3420_c0_g2_i8	4662	0	88.09	0	0.58	0	0.39	9.56921	tr|A0A0J8E498|A0A0J8E498_BETVU Uncharacterized protein OS=Beta vulgaris subsp. vulgaris OX=3555 GN=BVRB_4g097200 PE=4 SV=1
TRINITY_DN538_c0_g1_i4	737	0	87.74	0	4.69	0	3.12	9.56921	-
TRINITY_DN5886_c0_g1_i1	1406	0	87.66	0	2.12	0	1.41	9.56921	tr|A0A0K9QJY0|A0A0K9QJY0_SPIOL Uncharacterized protein OS=Spinacia oleracea OX=3562 GN=SOVF_175820 PE=4 SV=1
TRINITY_DN744_c0_g1_i16	3597	0	88.08	0	0.76	0	0.51	9.56921	tr|A0A0K9QZE6|A0A0K9QZE6_SPIOL Uncharacterized protein OS=Spinacia oleracea OX=3562 GN=SOVF_129140 PE=3 SV=1
TRINITY_DN8259_c0_g1_i2	3047	0	87.86	0	0.91	0	0.6	9.56921	tr|A0A0K9QZD6|A0A0K9QZD6_SPIOL Uncharacterized protein OS=Spinacia oleracea OX=3562 GN=SOVF_123920 PE=4 SV=1
TRINITY_DN1575_c0_g1_i6	6352	0	87.24	0	0.42	0	0.28	9.55275	tr|A0A0K9R499|A0A0K9R499_SPIOL Uncharacterized protein OS=Spinacia oleracea OX=3562 GN=SOVF_108410 PE=4 SV=1
TRINITY_DN2218_c1_g1_i5	1833	0	86.66	0	1.55	0	1.03	9.55275	tr|A0A0K9RZB7|A0A0K9RZB7_SPIOL Uncharacterized protein OS=Spinacia oleracea OX=3562 GN=SOVF_017110 PE=4 SV=1
TRINITY_DN22359_c0_g1_i2	1944	0	87.31	0	1.47	0	0.98	9.55275	tr|A0A0K9REA5|A0A0K9REA5_SPIOL Uncharacterized protein OS=Spinacia oleracea OX=3562 GN=SOVF_081280 PE=4 SV=1
TRINITY_DN2643_c3_g1_i1	2056	0	87	0	1.37	0	0.91	9.55275	-
TRINITY_DN31_c0_g1_i10	5014	0	86.51	0	0.53	0	0.35	9.55275	tr|A0A0K9RC62|A0A0K9RC62_SPIOL Uncharacterized protein OS=Spinacia oleracea OX=3562 GN=SOVF_083570 PE=4 SV=1
TRINITY_DN3753_c0_g2_i17	3307	0	86.79	0	0.82	0	0.55	9.55275	tr|A0A0K9R287|A0A0K9R287_SPIOL Uncharacterized protein OS=Spinacia oleracea OX=3562 GN=SOVF_121680 PE=4 SV=1
TRINITY_DN4245_c0_g1_i2	1765	0	86.72	0	1.62	0	1.08	9.55275	-
TRINITY_DN4832_c0_g1_i5	4137	0	87.49	0	0.65	0	0.44	9.55275	tr|A0A0J8B3R4|A0A0J8B3R4_BETVU Conserved oligomeric Golgi complex subunit 8 OS=Beta vulgaris subsp. vulgaris OX=3555 GN=BVRB_004620 PE=3 SV=1
TRINITY_DN6044_c0_g1_i2	888	0	87.07	0	3.66	0	2.43	9.55275	tr|A0A0K9RTH1|A0A0K9RTH1_SPIOL Uncharacterized protein OS=Spinacia oleracea OX=3562 GN=SOVF_030270 PE=4 SV=1
TRINITY_DN6423_c0_g1_i6	2292	0	86.99	0	1.22	0	0.81	9.55275	tr|A0A0K9QCZ9|A0A0K9QCZ9_SPIOL Methionine aminopeptidase OS=Spinacia oleracea OX=3562 GN=SOVF_192940 PE=3 SV=1
TRINITY_DN7264_c0_g1_i2	1218	0	86.51	0	2.47	0	1.65	9.55275	tr|A0A0K9R5V9|A0A0K9R5V9_SPIOL Uncharacterized protein OS=Spinacia oleracea OX=3562 GN=SOVF_108430 PE=4 SV=1
TRINITY_DN854_c2_g1_i10	739	0	86.52	0	4.61	0	3.07	9.55275	-
TRINITY_DN9338_c0_g1_i4	3134	0	86.69	0	0.87	0	0.58	9.55275	tr|A0A0K9R015|A0A0K9R015_SPIOL Uncharacterized protein (Fragment) OS=Spinacia oleracea OX=3562 GN=SOVF_122240 PE=4 SV=1
TRINITY_DN2909_c3_g2_i7	2522	0	85.6	0	1.08	0	0.72	9.53609	tr|A0A0K9QNF5|A0A0K9QNF5_SPIOL Uncharacterized protein OS=Spinacia oleracea OX=3562 GN=SOVF_164510 PE=3 SV=1
TRINITY_DN3057_c0_g1_i4	963	0	85.55	0	3.25	0	2.16	9.53609	tr|A0A0K9RP36|A0A0K9RP36_SPIOL Uncharacterized protein OS=Spinacia oleracea OX=3562 GN=SOVF_050460 PE=4 SV=1
TRINITY_DN814_c0_g1_i13	3280	0	85.59	0	0.82	0	0.54	9.53609	tr|A0A0K9QD45|A0A0K9QD45_SPIOL Uncharacterized protein OS=Spinacia oleracea OX=3562 GN=SOVF_192840 PE=4 SV=1
TRINITY_DN1127_c1_g1_i1	3161	0	85.1	0	0.85	0	0.56	9.51924	tr|A0A0K9RXA6|A0A0K9RXA6_SPIOL Uncharacterized protein OS=Spinacia oleracea OX=3562 GN=SOVF_018970 PE=4 SV=1
TRINITY_DN2627_c0_g1_i24	4240	0	84.64	0	0.62	0	0.41	9.51924	tr|A0A0K9RRS1|A0A0K9RRS1_SPIOL Uncharacterized protein OS=Spinacia oleracea OX=3562 GN=SOVF_042440 PE=4 SV=1
TRINITY_DN2934_c0_g1_i4	2648	0	84.96	0	1.02	0	0.68	9.51924	tr|A0A0K9R512|A0A0K9R512_SPIOL Uncharacterized protein OS=Spinacia oleracea OX=3562 GN=SOVF_111950 PE=4 SV=1
TRINITY_DN3968_c0_g1_i9	2847	0	85.31	0	0.95	0	0.63	9.51924	tr|A0A0K9RXM2|A0A0K9RXM2_SPIOL Uncharacterized protein OS=Spinacia oleracea OX=3562 GN=SOVF_016970 PE=4 SV=1
TRINITY_DN4261_c0_g3_i10	1987	0	85.25	0	1.4	0	0.93	9.51924	tr|A0A0K9QVN6|A0A0K9QVN6_SPIOL Uncharacterized protein OS=Spinacia oleracea OX=3562 GN=SOVF_136080 PE=3 SV=1
TRINITY_DN16360_c0_g1_i2	3100	0	83.79	0	0.85	0	0.57	9.50219	tr|A0A0K9R942|A0A0K9R942_SPIOL Uncharacterized protein OS=Spinacia oleracea OX=3562 GN=SOVF_097740 PE=4 SV=1
TRINITY_DN1920_c0_g1_i2	1726	0.32	83.8	0.01	1.61	0	1.07	9.50219	tr|A0A0K9QU82|A0A0K9QU82_SPIOL Uncharacterized protein OS=Spinacia oleracea OX=3562 GN=SOVF_140840 PE=4 SV=1
TRINITY_DN2479_c0_g1_i1	425	0	84.49	0	10.35	0	6.89	9.50219	-
TRINITY_DN2654_c0_g1_i3	2185	0	84.35	0	1.25	0	0.83	9.50219	tr|A0A0K9Q9V6|A0A0K9Q9V6_SPIOL Uncharacterized protein OS=Spinacia oleracea OX=3562 GN=SOVF_203380 PE=4 SV=1
TRINITY_DN2841_c0_g1_i2	1756	0	83.52	0	1.57	0	1.05	9.50219	tr|A0A0K9QGE2|A0A0K9QGE2_SPIOL Uncharacterized protein OS=Spinacia oleracea OX=3562 GN=SOVF_188650 PE=4 SV=1
TRINITY_DN3034_c1_g2_i1	1996	0	84.37	0	1.38	0	0.92	9.50219	tr|A0A0K9QU95|A0A0K9QU95_SPIOL Uncharacterized protein OS=Spinacia oleracea OX=3562 GN=SOVF_140430 PE=4 SV=1
TRINITY_DN3238_c1_g1_i2	3144	0	84.3	0	0.84	0	0.56	9.50219	tr|A0A0J8B5Q4|A0A0J8B5Q4_BETVU Mechanosensitive ion channel protein OS=Beta vulgaris subsp. vulgaris OX=3555 GN=BVRB_010790 PE=3 SV=1
TRINITY_DN3508_c2_g1_i11	4109	0	84.4	0	0.64	0	0.42	9.50219	tr|A0A0K9RNH3|A0A0K9RNH3_SPIOL Uncharacterized protein (Fragment) OS=Spinacia oleracea OX=3562 GN=SOVF_052840 PE=4 SV=1
TRINITY_DN5181_c0_g1_i10	3472	0	83.74	0	0.75	0	0.5	9.50219	tr|A0A0K9QUM9|A0A0K9QUM9_SPIOL Uncharacterized protein OS=Spinacia oleracea OX=3562 GN=SOVF_146730 PE=4 SV=1
TRINITY_DN889_c0_g1_i1	2583	0	83.63	0	1.03	0	0.69	9.50219	tr|A0A0J8EMK8|A0A0J8EMK8_BETVU Fumarylacetoacetase OS=Beta vulgaris subsp. vulgaris OX=3555 GN=BVRB_8g185200 PE=3 SV=1
TRINITY_DN987_c0_g1_i22	4074	0	84.27	0	0.64	0	0.43	9.50219	tr|A0A0K9QF84|A0A0K9QF84_SPIOL Uncharacterized protein OS=Spinacia oleracea OX=3562 GN=SOVF_191370 PE=3 SV=1
TRINITY_DN9930_c0_g2_i1	1732	0	84.24	0	1.61	0	1.07	9.50219	tr|A0A0K9QIP5|A0A0K9QIP5_SPIOL Serine/threonine-protein phosphatase OS=Spinacia oleracea OX=3562 GN=SOVF_174900 PE=3 SV=1
TRINITY_DN1018_c0_g1_i26	4883	0	83.16	0	0.52	0	0.35	9.48494	tr|A0A0K9QY94|A0A0K9QY94_SPIOL Uncharacterized protein OS=Spinacia oleracea OX=3562 GN=SOVF_133120 PE=4 SV=1
TRINITY_DN10989_c0_g3_i1	2383	0	82.62	0	1.11	0	0.74	9.48494	tr|F4NCG2|F4NCG2_BETVU Uncharacterized protein OS=Beta vulgaris subsp. vulgaris OX=3555 PE=4 SV=1
TRINITY_DN278_c0_g1_i9	4985	0	82.93	0	0.51	0	0.34	9.48494	tr|A0A0J8B9C9|A0A0J8B9C9_BETVU Uncharacterized protein OS=Beta vulgaris subsp. vulgaris OX=3555 GN=BVRB_5g126070 PE=4 SV=1
TRINITY_DN4690_c0_g2_i7	2896	0	82.72	0	0.9	0	0.6	9.48494	tr|A0A0K9RZN6|A0A0K9RZN6_SPIOL Uncharacterized protein OS=Spinacia oleracea OX=3562 GN=SOVF_016860 PE=4 SV=1
TRINITY_DN5117_c0_g2_i3	1140	0	83.29	0	2.58	0	1.71	9.48494	tr|A0A0K9QDS3|A0A0K9QDS3_SPIOL Uncharacterized protein (Fragment) OS=Spinacia oleracea OX=3562 GN=SOVF_190600 PE=4 SV=1
TRINITY_DN12225_c0_g1_i9	2894	0	81.97	0	0.89	0	0.6	9.46747	tr|A2I5F1|A2I5F1_BETVU Transposon-like protein OS=Beta vulgaris OX=161934 PE=4 SV=1
TRINITY_DN3933_c0_g1_i7	2791	0	81.5	0	0.92	0	0.62	9.46747	tr|A0A0K9Q7I6|A0A0K9Q7I6_SPIOL Uncharacterized protein OS=Spinacia oleracea OX=3562 GN=SOVF_216880 PE=3 SV=1
TRINITY_DN4142_c0_g1_i7	702	0	81.95	0	4.68	0	3.11	9.46747	-
TRINITY_DN4346_c0_g1_i5	2424	0.16	81.74	0	1.08	0	0.72	9.46747	tr|A0A0J8B6L3|A0A0J8B6L3_BETVU Uncharacterized protein OS=Beta vulgaris subsp. vulgaris OX=3555 GN=BVRB_8g201270 PE=4 SV=1
TRINITY_DN4521_c0_g1_i31	11133	0	81.6	0	0.22	0	0.15	9.46747	tr|A0A0K9RKK8|A0A0K9RKK8_SPIOL Uncharacterized protein OS=Spinacia oleracea OX=3562 GN=SOVF_061310 PE=4 SV=1
TRINITY_DN4849_c0_g1_i8	2724	0	82.28	0	0.96	0	0.64	9.46747	tr|A0A0K9RRU2|A0A0K9RRU2_SPIOL Uncharacterized protein (Fragment) OS=Spinacia oleracea OX=3562 GN=SOVF_035610 PE=4 SV=1
TRINITY_DN491_c0_g1_i1	2712	0	82.08	0	0.96	0	0.64	9.46747	tr|A0A0K9QYR6|A0A0K9QYR6_SPIOL Uncharacterized protein OS=Spinacia oleracea OX=3562 GN=SOVF_126340 PE=3 SV=1
TRINITY_DN7123_c0_g1_i1	344	0	81.85	0	14.97	0	9.96	9.46747	-
TRINITY_DN8273_c0_g1_i2	3417	0.11	82.24	0	0.75	0	0.5	9.46747	tr|A0A0K9RML6|A0A0K9RML6_SPIOL Phospholipase D OS=Spinacia oleracea OX=3562 GN=SOVF_049470 PE=3 SV=1
TRINITY_DN9942_c0_g1_i5	3841	0	81.91	0	0.66	0	0.44	9.46747	tr|A0A0K9S2L6|A0A0K9S2L6_SPIOL Uncharacterized protein OS=Spinacia oleracea OX=3562 GN=SOVF_000890 PE=3 SV=1
TRINITY_DN12703_c0_g2_i2	2876	0	81.36	0	0.89	0	0.59	9.4498	tr|A0A0K9QK28|A0A0K9QK28_SPIOL Uncharacterized protein OS=Spinacia oleracea OX=3562 GN=SOVF_175310 PE=4 SV=1
TRINITY_DN19227_c0_g1_i8	5510	0	81.43	0	0.45	0	0.3	9.4498	tr|A5LI40|A5LI40_FAGES Multidrug resistance-associated protein OS=Fagopyrum esculentum OX=3617 GN=FeABCC1 PE=2 SV=1
TRINITY_DN1954_c0_g1_i6	4322	0	81.2	0	0.58	0	0.39	9.4498	tr|A0A0K9RGM3|A0A0K9RGM3_SPIOL Uncharacterized protein OS=Spinacia oleracea OX=3562 GN=SOVF_068810 PE=3 SV=1
TRINITY_DN242_c0_g1_i5	1506	0	80.82	0	1.81	0	1.2	9.4498	tr|A0A0K9RZ90|A0A0K9RZ90_SPIOL Uncharacterized protein OS=Spinacia oleracea OX=3562 GN=SOVF_017500 PE=4 SV=1
TRINITY_DN3013_c0_g1_i4	1917	0	80.79	0	1.38	0	0.92	9.4498	tr|A0A0K9QNX0|A0A0K9QNX0_SPIOL Uncharacterized protein OS=Spinacia oleracea OX=3562 GN=SOVF_164050 PE=4 SV=1
TRINITY_DN305_c0_g1_i1	2974	0	80.68	0	0.86	0	0.57	9.4498	tr|A0A0K9RDJ5|A0A0K9RDJ5_SPIOL Uncharacterized protein OS=Spinacia oleracea OX=3562 GN=SOVF_084920 PE=4 SV=1
TRINITY_DN315_c1_g1_i3	4874	0	80.99	0	0.51	0	0.34	9.4498	tr|A0A0K9QVS6|A0A0K9QVS6_SPIOL Condensin complex subunit 1 OS=Spinacia oleracea OX=3562 GN=SOVF_135890 PE=3 SV=1
TRINITY_DN3418_c0_g1_i6	2476	0	80.7	0	1.04	0	0.69	9.4498	tr|A0A0K9R9A1|A0A0K9R9A1_SPIOL Uncharacterized protein OS=Spinacia oleracea OX=3562 GN=SOVF_099040 PE=4 SV=1
TRINITY_DN3528_c2_g1_i19	6524	0	81.36	0	0.38	0	0.25	9.4498	tr|J3SIC4|J3SIC4_BETVU ATP-dependent DNA helicase OS=Beta vulgaris subsp. vulgaris OX=3555 PE=3 SV=1
TRINITY_DN3690_c0_g1_i7	4112	0	80.99	0	0.61	0	0.41	9.4498	tr|A0A0K9RFE6|A0A0K9RFE6_SPIOL Uncharacterized protein OS=Spinacia oleracea OX=3562 GN=SOVF_078130 PE=4 SV=1
TRINITY_DN3928_c1_g2_i1	305	0	81.14	0	19.27	0	12.82	9.4498	-
TRINITY_DN406_c0_g1_i6	6598	0	80.53	0	0.37	0	0.25	9.4498	tr|A0FD18|A0FD18_BETVU NBS-LRR type resistance protein OS=Beta vulgaris OX=161934 PE=2 SV=1
TRINITY_DN5153_c0_g1_i5	1484	0	81.36	0	1.85	0	1.23	9.4498	tr|A0A0J8B6R4|A0A0J8B6R4_BETVU Uncharacterized protein OS=Beta vulgaris subsp. vulgaris OX=3555 GN=BVRB_006660 PE=4 SV=1
TRINITY_DN1158_c0_g2_i3	322	0	80.46	0	16.92	0	11.26	9.4319	-
TRINITY_DN1264_c0_g1_i13	2943	0	79.93	0	0.86	0	0.57	9.4319	tr|A0A0K9QR83|A0A0K9QR83_SPIOL Uncharacterized protein OS=Spinacia oleracea OX=3562 GN=SOVF_150330 PE=4 SV=1
TRINITY_DN19842_c0_g1_i1	1949	0	80	0	1.34	0	0.89	9.4319	-
TRINITY_DN279_c1_g1_i22	2666	0	80.2	0	0.96	0	0.64	9.4319	tr|A0A0K9RZZ0|A0A0K9RZZ0_SPIOL Uncharacterized protein OS=Spinacia oleracea OX=3562 GN=SOVF_009900 PE=3 SV=1
TRINITY_DN30687_c0_g1_i3	2716	0	79.6	0	0.93	0	0.62	9.4319	tr|A0A0K9R458|A0A0K9R458_SPIOL Uncharacterized protein OS=Spinacia oleracea OX=3562 GN=SOVF_114250 PE=4 SV=1
TRINITY_DN367_c0_g1_i3	1595	0.02	79.85	0	1.67	0	1.11	9.4319	tr|A0A0K9Q905|A0A0K9Q905_SPIOL Uncharacterized protein OS=Spinacia oleracea OX=3562 GN=SOVF_213220 PE=4 SV=1
TRINITY_DN4139_c0_g1_i4	2363	0	79.5	0	1.08	0	0.72	9.4319	tr|A0A0K9QU62|A0A0K9QU62_SPIOL Uncharacterized protein OS=Spinacia oleracea OX=3562 GN=SOVF_141090 PE=4 SV=1
TRINITY_DN557_c0_g1_i6	1890	0	80.19	0	1.39	0	0.92	9.4319	tr|A0A0K9S277|A0A0K9S277_SPIOL Uncharacterized protein OS=Spinacia oleracea OX=3562 GN=SOVF_008470 PE=4 SV=1
TRINITY_DN560_c0_g1_i2	928	0	79.92	0	3.18	0	2.11	9.4319	tr|A0A0K9QQA8|A0A0K9QQA8_SPIOL Uncharacterized protein OS=Spinacia oleracea OX=3562 GN=SOVF_153510 PE=4 SV=1
TRINITY_DN1098_c1_g1_i9	1509	0	79.37	0	1.77	0	1.18	9.41378	tr|A0A0K9S1Q3|A0A0K9S1Q3_SPIOL Uncharacterized protein OS=Spinacia oleracea OX=3562 GN=SOVF_004350 PE=4 SV=1
TRINITY_DN158_c0_g2_i3	1629	0	78.73	0	1.61	0	1.07	9.41378	tr|A0A0J8B611|A0A0J8B611_BETVU Uncharacterized protein OS=Beta vulgaris subsp. vulgaris OX=3555 GN=BVRB_9g224950 PE=4 SV=1
TRINITY_DN3651_c0_g1_i13	3591	0	79.49	0	0.69	0	0.46	9.41378	tr|A0A0K9RGW1|A0A0K9RGW1_SPIOL Uncharacterized protein OS=Spinacia oleracea OX=3562 GN=SOVF_068280 PE=4 SV=1
TRINITY_DN4261_c0_g3_i4	2058	0	79.45	0	1.25	0	0.83	9.41378	tr|A0A0K9QVN6|A0A0K9QVN6_SPIOL Uncharacterized protein OS=Spinacia oleracea OX=3562 GN=SOVF_136080 PE=3 SV=1
TRINITY_DN557_c0_g1_i4	1760	0	78.51	0	1.47	0	0.98	9.41378	tr|A0A0K9S277|A0A0K9S277_SPIOL Uncharacterized protein OS=Spinacia oleracea OX=3562 GN=SOVF_008470 PE=4 SV=1
TRINITY_DN7745_c0_g4_i2	2444	0	78.78	0	1.03	0	0.69	9.41378	-
TRINITY_DN774_c0_g1_i4	3111	0	78.87	0	0.8	0	0.53	9.41378	tr|A0A0K9RY77|A0A0K9RY77_SPIOL Uncharacterized protein OS=Spinacia oleracea OX=3562 GN=SOVF_021290 PE=4 SV=1
TRINITY_DN10129_c0_g1_i7	4631	0	78.28	0	0.52	0	0.35	9.39543	tr|A0A0K9RTC9|A0A0K9RTC9_SPIOL Uncharacterized protein OS=Spinacia oleracea OX=3562 GN=SOVF_030700 PE=4 SV=1
TRINITY_DN14247_c0_g2_i11	2487	0	78.02	0	1	0	0.67	9.39543	tr|A0A0K9QN16|A0A0K9QN16_SPIOL Uncharacterized protein OS=Spinacia oleracea OX=3562 GN=SOVF_160950 PE=4 SV=1
TRINITY_DN1718_c0_g1_i13	2051	0	78.36	0	1.24	0	0.83	9.39543	tr|A0A0J8B3X6|A0A0J8B3X6_BETVU Uncharacterized protein OS=Beta vulgaris subsp. vulgaris OX=3555 GN=BVRB_003990 PE=3 SV=1
TRINITY_DN1841_c0_g1_i1	572	0	78	0	5.95	0	3.96	9.39543	-
TRINITY_DN2218_c1_g1_i9	834	0	77.8	0	3.54	0	2.36	9.39543	tr|A0A0K9RZB7|A0A0K9RZB7_SPIOL Uncharacterized protein OS=Spinacia oleracea OX=3562 GN=SOVF_017110 PE=4 SV=1
TRINITY_DN2423_c1_g1_i10	2580	0	78.14	0	0.96	0	0.64	9.39543	tr|A0A0K9RQ99|A0A0K9RQ99_SPIOL Uncharacterized protein OS=Spinacia oleracea OX=3562 GN=SOVF_046630 PE=4 SV=1
TRINITY_DN319_c0_g1_i10	1349	0	77.87	0	1.98	0	1.32	9.39543	-
TRINITY_DN3533_c0_g1_i4	3310	0	77.86	0	0.74	0	0.49	9.39543	tr|A0A0K9RZB8|A0A0K9RZB8_SPIOL Uncharacterized protein OS=Spinacia oleracea OX=3562 GN=SOVF_011700 PE=4 SV=1
TRINITY_DN4865_c1_g1_i3	2011	0	78.17	0	1.27	0	0.84	9.39543	-
TRINITY_DN5233_c0_g1_i5	1903	0	77.7	0	1.34	0	0.89	9.39543	tr|A0A0K9R9M9|A0A0K9R9M9_SPIOL Uncharacterized protein (Fragment) OS=Spinacia oleracea OX=3562 GN=SOVF_095880 PE=4 SV=1
TRINITY_DN6025_c1_g1_i5	2295	0.01	77.96	0	1.09	0	0.73	9.39543	tr|A0A0K9QHS5|A0A0K9QHS5_SPIOL Uncharacterized protein OS=Spinacia oleracea OX=3562 GN=SOVF_182460 PE=4 SV=1
TRINITY_DN722_c0_g1_i12	229	0	77.86	0	39.96	0	26.59	9.39543	-
TRINITY_DN879_c0_g3_i1	738	0	77.69	0	4.15	0	2.76	9.39543	-
TRINITY_DN1019_c0_g1_i5	2164	0	76.95	0	1.15	0	0.76	9.37684	tr|A0A0J8BRS6|A0A0J8BRS6_BETVU ER membrane protein complex subunit 3 OS=Beta vulgaris subsp. vulgaris OX=3555 GN=BVRB_8g185050 PE=3 SV=1
TRINITY_DN14080_c0_g1_i12	4243	0.1	76.67	0	0.56	0	0.37	9.37684	tr|A0A0K9QV11|A0A0K9QV11_SPIOL Uncharacterized protein OS=Spinacia oleracea OX=3562 GN=SOVF_145050 PE=3 SV=1
TRINITY_DN1459_c0_g1_i1	2949	0	77.17	0	0.83	0	0.55	9.37684	tr|A0A0K9QA62|A0A0K9QA62_SPIOL Uncharacterized protein OS=Spinacia oleracea OX=3562 GN=SOVF_202240 PE=4 SV=1
TRINITY_DN1635_c0_g1_i11	3672	0	77.06	0	0.65	0	0.43	9.37684	tr|A0A0K9S451|A0A0K9S451_SPIOL Uncharacterized protein OS=Spinacia oleracea OX=3562 GN=SOVF_001990 PE=3 SV=1
TRINITY_DN18484_c0_g1_i1	2565	0	77	0	0.96	0	0.64	9.37684	tr|E2DMZ5|E2DMZ5_BETVU Uncharacterized protein OS=Beta vulgaris OX=161934 PE=4 SV=1
TRINITY_DN2272_c0_g1_i4	2521	0	76.81	0	0.97	0	0.65	9.37684	tr|A0A0K9QWZ1|A0A0K9QWZ1_SPIOL Uncharacterized protein OS=Spinacia oleracea OX=3562 GN=SOVF_131850 PE=4 SV=1
TRINITY_DN3073_c0_g1_i5	5461	0.03	76.9	0	0.43	0	0.29	9.37684	tr|A0A0K9QGM3|A0A0K9QGM3_SPIOL Uncharacterized protein OS=Spinacia oleracea OX=3562 GN=SOVF_181460 PE=4 SV=1
TRINITY_DN3158_c1_g1_i2	517	0	76.85	0	6.83	0	4.54	9.37684	-
TRINITY_DN3288_c0_g1_i2	1739	0	76.74	0	1.46	0	0.97	9.37684	tr|A0A0K9RP72|A0A0K9RP72_SPIOL Signal peptidase I OS=Spinacia oleracea OX=3562 GN=SOVF_044460 PE=3 SV=1
TRINITY_DN6947_c0_g2_i1	1561	0	76.83	0	1.65	0	1.1	9.37684	tr|A0A0J8CWT5|A0A0J8CWT5_BETVU Uncharacterized protein OS=Beta vulgaris subsp. vulgaris OX=3555 GN=BVRB_3g050510 PE=4 SV=1
TRINITY_DN7973_c0_g1_i6	3029	0	77.16	0	0.8	0	0.53	9.37684	tr|A0A0K9R1I4|A0A0K9R1I4_SPIOL Mitogen-activated protein kinase OS=Spinacia oleracea OX=3562 GN=SOVF_117550 PE=3 SV=1
TRINITY_DN7981_c0_g1_i8	2868	0	76.59	0	0.84	0	0.56	9.37684	tr|A0A0K9Q9Q3|A0A0K9Q9Q3_SPIOL Uncharacterized protein OS=Spinacia oleracea OX=3562 GN=SOVF_203930 PE=4 SV=1
TRINITY_DN847_c0_g1_i15	2198	0	77.06	0	1.13	0	0.75	9.37684	tr|A0A0K9QZ18|A0A0K9QZ18_SPIOL Uncharacterized protein OS=Spinacia oleracea OX=3562 GN=SOVF_125390 PE=4 SV=1
TRINITY_DN1526_c0_g1_i4	1053	0.01	75.65	0	2.57	0	1.71	9.35801	tr|A0A0K9QSS9|A0A0K9QSS9_SPIOL Histone H3 OS=Spinacia oleracea OX=3562 GN=SOVF_037400 PE=3 SV=1
TRINITY_DN1715_c1_g1_i1	3242	0	75.69	0	0.73	0	0.49	9.35801	tr|A0A0K9S077|A0A0K9S077_SPIOL Uncharacterized protein OS=Spinacia oleracea OX=3562 GN=SOVF_014700 PE=4 SV=1
TRINITY_DN17214_c0_g1_i8	4310	0	75.82	0	0.54	0	0.36	9.35801	tr|A0A0K9RKZ4|A0A0K9RKZ4_SPIOL Uncharacterized protein OS=Spinacia oleracea OX=3562 GN=SOVF_060850 PE=3 SV=1
TRINITY_DN2121_c0_g1_i6	2426	0	75.87	0	1	0	0.67	9.35801	tr|A0A0K9RR76|A0A0K9RR76_SPIOL Uncharacterized protein OS=Spinacia oleracea OX=3562 GN=SOVF_037770 PE=3 SV=1
TRINITY_DN2302_c1_g1_i6	1040	0	76.25	0	2.63	0	1.75	9.35801	-
TRINITY_DN2674_c0_g1_i9	686	0	76.31	0	4.5	0	2.99	9.35801	-
TRINITY_DN3717_c0_g1_i4	2047	0	76.07	0	1.21	0	0.8	9.35801	-
TRINITY_DN3885_c0_g3_i1	2150	0	76.06	0	1.14	0	0.76	9.35801	tr|A0A0K9R4T7|A0A0K9R4T7_SPIOL Uncharacterized protein OS=Spinacia oleracea OX=3562 GN=SOVF_106950 PE=3 SV=1
TRINITY_DN6320_c0_g4_i1	664	0	76	0	4.68	0	3.12	9.35801	-
TRINITY_DN16871_c0_g1_i2	914	0	75.4	0	3.05	0	2.03	9.33893	tr|A0A0K9R5U3|A0A0K9R5U3_SPIOL Uncharacterized protein OS=Spinacia oleracea OX=3562 GN=SOVF_110060 PE=4 SV=1
TRINITY_DN3711_c0_g1_i2	1701	0	74.86	0	1.46	0	0.97	9.33893	tr|A0A0K9RWM9|A0A0K9RWM9_SPIOL Uncharacterized protein OS=Spinacia oleracea OX=3562 GN=SOVF_026600 PE=4 SV=1
TRINITY_DN5755_c0_g2_i1	3315	0	75.15	0	0.71	0	0.47	9.33893	tr|A0A0K9QJX8|A0A0K9QJX8_SPIOL Uncharacterized protein OS=Spinacia oleracea OX=3562 GN=SOVF_176940 PE=4 SV=1
TRINITY_DN8337_c0_g2_i1	571	0	75	0	5.73	0	3.81	9.33893	-
TRINITY_DN2115_c0_g1_i7	3093	0	73.69	0	0.75	0	0.5	9.31959	tr|A0A0K9RWX4|A0A0K9RWX4_SPIOL Uncharacterized protein OS=Spinacia oleracea OX=3562 GN=SOVF_019800 PE=4 SV=1
TRINITY_DN2262_c0_g1_i13	2065	0	74.45	0	1.17	0	0.78	9.31959	tr|A0A0K9RNN6|A0A0K9RNN6_SPIOL Uncharacterized protein OS=Spinacia oleracea OX=3562 GN=SOVF_051630 PE=3 SV=1
TRINITY_DN3001_c0_g1_i8	2231	0.02	74.02	0	1.07	0	0.71	9.31959	tr|A0A0K9QSI9|A0A0K9QSI9_SPIOL Uncharacterized protein (Fragment) OS=Spinacia oleracea OX=3562 GN=SOVF_152950 PE=4 SV=1
TRINITY_DN3747_c0_g3_i5	2549	0	74.11	0	0.93	0	0.62	9.31959	tr|A0A0K9QV90|A0A0K9QV90_SPIOL Presenilin OS=Spinacia oleracea OX=3562 GN=SOVF_137800 PE=3 SV=1
TRINITY_DN4892_c0_g1_i1	2050	0	74	0	1.17	0	0.78	9.31959	tr|Q0PEL6|Q0PEL6_BETVU Putative integrase OS=Beta vulgaris OX=161934 PE=4 SV=1
TRINITY_DN2509_c10_g1_i7	3658	0.8	626.2	0.01	5.33	0	3.55	9.31711	tr|W6JKE4|W6JKE4_SPIOL Chlorophyll a-b binding protein, chloroplastic (Fragment) OS=Spinacia oleracea OX=3562 GN=lhcb5 PE=2 SV=1
TRINITY_DN10102_c0_g2_i3	2576	0	73.06	0	0.9	0	0.6	9.3	tr|A0A0K9R3T7|A0A0K9R3T7_SPIOL Uncharacterized protein OS=Spinacia oleracea OX=3562 GN=SOVF_109930 PE=4 SV=1
TRINITY_DN1335_c0_g1_i1	3267	0	72.71	0	0.7	0	0.46	9.3	tr|A0A0K9RLL2|A0A0K9RLL2_SPIOL Uncharacterized protein OS=Spinacia oleracea OX=3562 GN=SOVF_052900 PE=4 SV=1
TRINITY_DN213_c0_g1_i10	664	0	72.88	0	4.49	0	2.99	9.3	tr|A0A0K9R859|A0A0K9R859_SPIOL Uncharacterized protein OS=Spinacia oleracea OX=3562 GN=SOVF_096140 PE=4 SV=1
TRINITY_DN2142_c0_g1_i10	1116	0	73.15	0	2.32	0	1.54	9.3	tr|A0A0J8BAI7|A0A0J8BAI7_BETVU Uncharacterized protein OS=Beta vulgaris subsp. vulgaris OX=3555 GN=BVRB_7g179850 PE=4 SV=1
TRINITY_DN2765_c1_g1_i6	1197	0	72.56	0	2.12	0	1.41	9.3	tr|A0A0K9QKG1|A0A0K9QKG1_SPIOL Uncharacterized protein OS=Spinacia oleracea OX=3562 GN=SOVF_168390 PE=4 SV=1
TRINITY_DN4261_c0_g3_i1	2318	0	72.81	0	1.01	0	0.67	9.3	tr|A0A0K9QVN6|A0A0K9QVN6_SPIOL Uncharacterized protein OS=Spinacia oleracea OX=3562 GN=SOVF_136080 PE=3 SV=1
TRINITY_DN5237_c1_g1_i6	2169	0	72.93	0	1.09	0	0.72	9.3	tr|A0A0K9Q981|A0A0K9Q981_SPIOL Uncharacterized protein (Fragment) OS=Spinacia oleracea OX=3562 GN=SOVF_211060 PE=4 SV=1
TRINITY_DN600_c0_g1_i5	2426	0	73.27	0	0.97	0	0.64	9.3	tr|A0A0K9R6H9|A0A0K9R6H9_SPIOL Uncharacterized protein OS=Spinacia oleracea OX=3562 GN=SOVF_101240 PE=4 SV=1
TRINITY_DN1416_c1_g1_i2	1038	10.02	5515.61	0.34	190.98	0.23	127.07	9.29656	tr|A0A0K9RWP9|A0A0K9RWP9_SPIOL Uncharacterized protein OS=Spinacia oleracea OX=3562 GN=SOVF_020320 PE=4 SV=1
TRINITY_DN10152_c0_g1_i2	433	0	71.97	0	8.54	0	5.68	9.28013	-
TRINITY_DN1095_c0_g1_i8	364	0	71.63	0	11.69	0	7.78	9.28013	-
TRINITY_DN17279_c0_g2_i2	935	0	71.6	0	2.82	0	1.88	9.28013	tr|A0A0K9QFE9|A0A0K9QFE9_SPIOL Uncharacterized protein OS=Spinacia oleracea OX=3562 GN=SOVF_190400 PE=4 SV=1
TRINITY_DN2381_c0_g2_i1	427	0	72	0	8.75	0	5.82	9.28013	-
TRINITY_DN2414_c0_g1_i4	1385	0	71.89	0	1.77	0	1.18	9.28013	tr|A0A0K9R958|A0A0K9R958_SPIOL Uncharacterized protein OS=Spinacia oleracea OX=3562 GN=SOVF_097610 PE=4 SV=1
TRINITY_DN2620_c0_g1_i10	5441	0	72.14	0	0.41	0	0.27	9.28013	tr|E7BQD5|E7BQD5_SILLA Gag-pol polyprotein OS=Silene latifolia OX=37657 PE=4 SV=1
TRINITY_DN2882_c0_g1_i11	1908	0	71.62	0	1.23	0	0.82	9.28013	tr|A0A0K9R1Q6|A0A0K9R1Q6_SPIOL Uncharacterized protein OS=Spinacia oleracea OX=3562 GN=SOVF_116900 PE=3 SV=1
TRINITY_DN3528_c2_g1_i18	6700	0	72.09	0	0.33	0	0.22	9.28013	tr|J3SIC4|J3SIC4_BETVU ATP-dependent DNA helicase OS=Beta vulgaris subsp. vulgaris OX=3555 PE=3 SV=1
TRINITY_DN4261_c0_g3_i2	1977	0	71.51	0	1.18	0	0.78	9.28013	tr|A0A0K9QVN6|A0A0K9QVN6_SPIOL Uncharacterized protein OS=Spinacia oleracea OX=3562 GN=SOVF_136080 PE=3 SV=1
TRINITY_DN4383_c0_g1_i1	4803	0.01	71.64	0	0.46	0	0.31	9.28013	tr|A0A0K9RWZ4|A0A0K9RWZ4_SPIOL Uncharacterized protein OS=Spinacia oleracea OX=3562 GN=SOVF_019200 PE=4 SV=1
TRINITY_DN7345_c0_g2_i3	4091	0	71.82	0	0.54	0	0.36	9.28013	tr|A0A0K9RZS1|A0A0K9RZS1_SPIOL Uncharacterized protein OS=Spinacia oleracea OX=3562 GN=SOVF_010360 PE=3 SV=1
TRINITY_DN982_c1_g1_i7	5207	0	71.89	0	0.42	0	0.28	9.28013	tr|A0A0K9R7A1|A0A0K9R7A1_SPIOL Uncharacterized protein OS=Spinacia oleracea OX=3562 GN=SOVF_103520 PE=4 SV=1
TRINITY_DN1010_c0_g1_i2	3060	0	71.02	0	0.73	0	0.49	9.25998	tr|A0A0K9RSQ8|A0A0K9RSQ8_SPIOL Uncharacterized protein OS=Spinacia oleracea OX=3562 GN=SOVF_039610 PE=4 SV=1
TRINITY_DN10829_c1_g1_i2	643	0	71.01	0	4.58	0	3.04	9.25998	tr|A0A0K9RYX7|A0A0K9RYX7_SPIOL Uncharacterized protein OS=Spinacia oleracea OX=3562 GN=SOVF_013510 PE=4 SV=1
TRINITY_DN1143_c0_g2_i5	1889	0.03	70.68	0	1.23	0	0.82	9.25998	tr|A0A0K9QRV4|A0A0K9QRV4_SPIOL S-acyltransferase OS=Spinacia oleracea OX=3562 GN=SOVF_148180 PE=3 SV=1
TRINITY_DN14501_c0_g1_i3	746	0	71.37	0	3.76	0	2.5	9.25998	-
TRINITY_DN173_c0_g1_i1	2012	0.03	71.45	0	1.16	0	0.77	9.25998	tr|A0A1C8C321|A0A1C8C321_SALEU Phosphatidylserine synthase OS=Salicornia europaea OX=206448 GN=PSS PE=2 SV=1
TRINITY_DN2306_c1_g1_i5	2166	0	71.41	0	1.07	0	0.71	9.25998	tr|A0A0K9R7F9|A0A0K9R7F9_SPIOL Uncharacterized protein OS=Spinacia oleracea OX=3562 GN=SOVF_098260 PE=4 SV=1
TRINITY_DN7674_c0_g1_i5	2285	0	71.44	0	1.01	0	0.67	9.25998	tr|A0A0K9RIL4|A0A0K9RIL4_SPIOL Uncharacterized protein (Fragment) OS=Spinacia oleracea OX=3562 GN=SOVF_067710 PE=3 SV=1
TRINITY_DN798_c0_g1_i2	2464	0.12	70.77	0	0.92	0	0.61	9.25998	tr|A0A0K9RHC1|A0A0K9RHC1_SPIOL S-acyltransferase OS=Spinacia oleracea OX=3562 GN=SOVF_066470 PE=3 SV=1
TRINITY_DN1336_c0_g1_i8	2015	0	70.07	0	1.13	0	0.75	9.23955	tr|A0A0K9QJV3|A0A0K9QJV3_SPIOL Uncharacterized protein OS=Spinacia oleracea OX=3562 GN=SOVF_171080 PE=3 SV=1
TRINITY_DN21052_c0_g3_i1	3762	0	70.31	0	0.58	0	0.39	9.23955	-
TRINITY_DN2568_c0_g1_i3	4793	0	69.61	0	0.45	0	0.3	9.23955	tr|A0A0K9R2B8|A0A0K9R2B8_SPIOL Uncharacterized protein OS=Spinacia oleracea OX=3562 GN=SOVF_120970 PE=4 SV=1
TRINITY_DN58_c0_g3_i1	1324	0	70.36	0	1.83	0	1.21	9.23955	tr|A0A0K9RKI7|A0A0K9RKI7_SPIOL Uncharacterized protein OS=Spinacia oleracea OX=3562 GN=SOVF_061530 PE=4 SV=1
TRINITY_DN6145_c0_g1_i13	2405	0	69.69	0	0.93	0	0.62	9.23955	tr|A0A221C716|A0A221C716_AMATR Malate dehydrogenase OS=Amaranthus tricolor OX=29722 PE=2 SV=1
TRINITY_DN6308_c0_g2_i2	402	0	69.54	0	9.41	0	6.26	9.23955	-
TRINITY_DN8931_c0_g1_i15	2799	1.2	589.91	0.01	6.67	0.01	4.44	9.23168	tr|A0A0K9S108|A0A0K9S108_SPIOL Lipoxygenase OS=Spinacia oleracea OX=3562 GN=SOVF_005490 PE=3 SV=1
TRINITY_DN13231_c0_g3_i1	886	0	69	0	2.91	0	1.93	9.21883	tr|E7BQD5|E7BQD5_SILLA Gag-pol polyprotein OS=Silene latifolia OX=37657 PE=4 SV=1
TRINITY_DN1450_c0_g1_i6	1767	0	69.13	0	1.29	0	0.86	9.21883	tr|A0A0K9QQE9|A0A0K9QQE9_SPIOL Uncharacterized protein OS=Spinacia oleracea OX=3562 GN=SOVF_157830 PE=4 SV=1
TRINITY_DN19435_c0_g1_i4	4452	0	69.43	0	0.48	0	0.32	9.21883	tr|A0A0K9R8K6|A0A0K9R8K6_SPIOL Uncharacterized protein (Fragment) OS=Spinacia oleracea OX=3562 GN=SOVF_094150 PE=3 SV=1
TRINITY_DN19530_c0_g1_i2	2300	0	68.97	0	0.96	0	0.64	9.21883	-
TRINITY_DN2758_c0_g1_i3	488	0	68.55	0	6.67	0	4.44	9.21883	tr|A0A0K9R1B8|A0A0K9R1B8_SPIOL Uncharacterized protein OS=Spinacia oleracea OX=3562 GN=SOVF_117870 PE=4 SV=1
TRINITY_DN3011_c0_g1_i2	2070	0	69.34	0	1.09	0	0.72	9.21883	tr|C7DYC4|C7DYC4_BETVU Plasma membrane intrinsic protein PIP1;1 OS=Beta vulgaris subsp. vulgaris OX=3555 PE=2 SV=1
TRINITY_DN6084_c0_g1_i2	1675	0	68.64	0	1.36	0	0.91	9.21883	tr|A0A0K9RKP7|A0A0K9RKP7_SPIOL Uncharacterized protein OS=Spinacia oleracea OX=3562 GN=SOVF_055820 PE=3 SV=1
TRINITY_DN6118_c0_g3_i1	6598	0	68.65	0	0.32	0	0.21	9.21883	tr|E7BQD5|E7BQD5_SILLA Gag-pol polyprotein OS=Silene latifolia OX=37657 PE=4 SV=1
TRINITY_DN7416_c0_g1_i1	4153	0	68.92	0	0.51	0	0.34	9.21883	tr|A0A0K9R584|A0A0K9R584_SPIOL Uncharacterized protein OS=Spinacia oleracea OX=3562 GN=SOVF_111510 PE=3 SV=1
TRINITY_DN12723_c0_g1_i5	712	0	68	0	3.81	0	2.53	9.1978	tr|A0A0K9QDS3|A0A0K9QDS3_SPIOL Uncharacterized protein (Fragment) OS=Spinacia oleracea OX=3562 GN=SOVF_190600 PE=4 SV=1
TRINITY_DN13261_c0_g1_i5	1389	0	67.79	0	1.66	0	1.11	9.1978	tr|A0A0K9RID5|A0A0K9RID5_SPIOL Uncharacterized protein OS=Spinacia oleracea OX=3562 GN=SOVF_068360 PE=4 SV=1
TRINITY_DN13678_c0_g1_i3	1147	0	68.16	0	2.09	0	1.39	9.1978	tr|A0A0K9QEJ0|A0A0K9QEJ0_SPIOL Uncharacterized protein OS=Spinacia oleracea OX=3562 GN=SOVF_188100 PE=4 SV=1
TRINITY_DN1926_c0_g1_i4	2981	0	67.94	0	0.72	0	0.48	9.1978	tr|A0A0K9Q7S4|A0A0K9Q7S4_SPIOL Uncharacterized protein (Fragment) OS=Spinacia oleracea OX=3562 GN=SOVF_210470 PE=4 SV=1
TRINITY_DN4055_c0_g1_i2	1180	0	68.23	0	2.03	0	1.35	9.1978	tr|A0A0K9RZF2|A0A0K9RZF2_SPIOL Dolichol-phosphate mannosyltransferase subunit 1 OS=Spinacia oleracea OX=3562 GN=SOVF_011570 PE=3 SV=1
TRINITY_DN4597_c0_g1_i2	7270	0	68.01	0	0.28	0	0.19	9.1978	tr|A0A0K9QI95|A0A0K9QI95_SPIOL Uncharacterized protein OS=Spinacia oleracea OX=3562 GN=SOVF_176140 PE=4 SV=1
TRINITY_DN6303_c1_g1_i10	1559	0	67.69	0	1.46	0	0.97	9.1978	tr|A0A0K9RCV1|A0A0K9RCV1_SPIOL Protein yippee-like OS=Spinacia oleracea OX=3562 GN=SOVF_081200 PE=3 SV=1
TRINITY_DN6500_c0_g1_i3	3279	0	68.22	0	0.65	0	0.43	9.1978	tr|A0A0K9S014|A0A0K9S014_SPIOL Uncharacterized protein OS=Spinacia oleracea OX=3562 GN=SOVF_015210 PE=4 SV=1
TRINITY_DN7404_c0_g1_i5	3027	0	67.77	0	0.7	0	0.47	9.1978	tr|A0A0K9R6B5|A0A0K9R6B5_SPIOL Uncharacterized protein OS=Spinacia oleracea OX=3562 GN=SOVF_107170 PE=4 SV=1
TRINITY_DN9289_c0_g1_i11	2238	0	67.66	0	0.97	0	0.65	9.1978	tr|A0A0K9RFR1|A0A0K9RFR1_SPIOL Uncharacterized protein OS=Spinacia oleracea OX=3562 GN=SOVF_071800 PE=4 SV=1
TRINITY_DN10429_c0_g4_i1	1484	0	67	0	1.52	0	1.01	9.17647	-
TRINITY_DN1422_c2_g1_i4	8728	0	67.21	0	0.23	0	0.15	9.17647	tr|A0A0K9RS94|A0A0K9RS94_SPIOL Uncharacterized protein OS=Spinacia oleracea OX=3562 GN=SOVF_034980 PE=4 SV=1
TRINITY_DN143_c0_g1_i11	3460	0	67.35	0	0.61	0	0.4	9.17647	tr|A0A0K9RSW9|A0A0K9RSW9_SPIOL Uncharacterized protein OS=Spinacia oleracea OX=3562 GN=SOVF_031060 PE=4 SV=1
TRINITY_DN14_c0_g4_i1	704	0	66.88	0	3.8	0	2.53	9.17647	-
TRINITY_DN1593_c0_g1_i6	3654	0	67.25	0	0.57	0	0.38	9.17647	tr|A0A0K9QN65|A0A0K9QN65_SPIOL Uncharacterized protein OS=Spinacia oleracea OX=3562 GN=SOVF_166280 PE=4 SV=1
TRINITY_DN1831_c0_g1_i5	626	0	67.2	0	4.5	0	2.99	9.17647	tr|A0A0J8DWK0|A0A0J8DWK0_BETVU Uncharacterized protein OS=Beta vulgaris subsp. vulgaris OX=3555 GN=BVRB_010730 PE=4 SV=1
TRINITY_DN1922_c0_g1_i5	3253	0.03	67.31	0	0.65	0	0.43	9.17647	tr|A0A0K9RAT6|A0A0K9RAT6_SPIOL Uncharacterized protein OS=Spinacia oleracea OX=3562 GN=SOVF_092950 PE=4 SV=1
TRINITY_DN2010_c0_g2_i8	2179	0	66.63	0	0.99	0	0.66	9.17647	tr|A0A0K9R5T3|A0A0K9R5T3_SPIOL Uncharacterized protein OS=Spinacia oleracea OX=3562 GN=SOVF_103330 PE=4 SV=1
TRINITY_DN2523_c0_g1_i1	892	0	67.33	0	2.81	0	1.87	9.17647	-
TRINITY_DN5026_c0_g1_i12	3565	0	66.69	0	0.58	0	0.39	9.17647	tr|A0A0K9R329|A0A0K9R329_SPIOL Uncharacterized protein OS=Spinacia oleracea OX=3562 GN=SOVF_117820 PE=4 SV=1
TRINITY_DN580_c0_g1_i4	1345	0	67.42	0	1.72	0	1.14	9.17647	tr|F2YL83|F2YL83_9CARY Actin 1 (Fragment) OS=Gypsophila vaccaria OX=39387 PE=2 SV=1
TRINITY_DN7198_c1_g1_i1	1012	0	67	0	2.39	0	1.59	9.17647	-
TRINITY_DN7630_c0_g2_i1	679	0	67.3	0	4.02	0	2.68	9.17647	tr|E7BQD5|E7BQD5_SILLA Gag-pol polyprotein OS=Silene latifolia OX=37657 PE=4 SV=1
TRINITY_DN8366_c0_g1_i3	2742	0.02	66.77	0	0.77	0	0.51	9.17647	tr|A0A0K9RLA9|A0A0K9RLA9_SPIOL Uncharacterized protein OS=Spinacia oleracea OX=3562 GN=SOVF_053560 PE=4 SV=1
TRINITY_DN10757_c0_g1_i1	2209	0	65.92	0	0.96	0	0.64	9.15481	tr|A0A0K9QXV6|A0A0K9QXV6_SPIOL Casein kinase II subunit beta OS=Spinacia oleracea OX=3562 GN=SOVF_135920 PE=3 SV=1
TRINITY_DN13777_c0_g1_i3	2269	0	66.42	0	0.94	0	0.63	9.15481	tr|A0A0K9RRI4|A0A0K9RRI4_SPIOL Uncharacterized protein OS=Spinacia oleracea OX=3562 GN=SOVF_036660 PE=4 SV=1
TRINITY_DN1667_c0_g1_i15	2338	0	66.09	0	0.91	0	0.6	9.15481	tr|A0A0K9QJ11|A0A0K9QJ11_SPIOL Uncharacterized protein OS=Spinacia oleracea OX=3562 GN=SOVF_173660 PE=4 SV=1
TRINITY_DN1960_c0_g1_i6	1202	0	66.49	0	1.93	0	1.29	9.15481	tr|A0A0K9Q885|A0A0K9Q885_SPIOL Uncharacterized protein OS=Spinacia oleracea OX=3562 GN=SOVF_209010 PE=4 SV=1
TRINITY_DN396_c0_g1_i3	2541	0	66.45	0	0.83	0	0.55	9.15481	tr|A0A0K9RVF8|A0A0K9RVF8_SPIOL Uncharacterized protein OS=Spinacia oleracea OX=3562 GN=SOVF_024180 PE=3 SV=1
TRINITY_DN4323_c0_g1_i3	1701	0	65.77	0	1.28	0	0.85	9.15481	tr|A0A0K9QZ12|A0A0K9QZ12_SPIOL Uncharacterized protein OS=Spinacia oleracea OX=3562 GN=SOVF_131710 PE=4 SV=1
TRINITY_DN4718_c0_g2_i11	4204	0	65.73	0	0.48	0	0.32	9.15481	tr|A0A0K9RN05|A0A0K9RN05_SPIOL Uncharacterized protein OS=Spinacia oleracea OX=3562 GN=SOVF_048250 PE=4 SV=1
TRINITY_DN5051_c1_g1_i4	1855	0	66.25	0	1.17	0	0.78	9.15481	-
TRINITY_DN7114_c0_g2_i14	6326	0	66.21	0	0.32	0	0.21	9.15481	tr|A0A0K9RLV8|A0A0K9RLV8_SPIOL Uncharacterized protein OS=Spinacia oleracea OX=3562 GN=SOVF_051900 PE=4 SV=1
TRINITY_DN7215_c0_g2_i4	2798	0	66.16	0	0.75	0	0.5	9.15481	tr|A0A0K9RZR2|A0A0K9RZR2_SPIOL Uncharacterized protein OS=Spinacia oleracea OX=3562 GN=SOVF_016010 PE=4 SV=1
TRINITY_DN9665_c1_g1_i13	2963	0	66.26	0	0.7	0	0.47	9.15481	tr|A0A0K9R3L5|A0A0K9R3L5_SPIOL Uncharacterized protein OS=Spinacia oleracea OX=3562 GN=SOVF_110930 PE=4 SV=1
TRINITY_DN1000_c0_g1_i18	6127	0	65.45	0	0.33	0	0.22	9.13282	tr|A0A0K9RBD5|A0A0K9RBD5_SPIOL Uncharacterized protein OS=Spinacia oleracea OX=3562 GN=SOVF_085770 PE=4 SV=1
TRINITY_DN10447_c0_g2_i5	4650	0	64.68	0	0.43	0	0.28	9.13282	tr|A0A0K9RIB0|A0A0K9RIB0_SPIOL Probable tRNA N6-adenosine threonylcarbamoyltransferase, mitochondrial OS=Spinacia oleracea OX=3562 GN=GCP1 PE=3 SV=1
TRINITY_DN10762_c0_g1_i8	910	0	65.43	0	2.67	0	1.77	9.13282	-
TRINITY_DN16371_c0_g1_i21	2667	0	64.6	0	0.77	0	0.51	9.13282	tr|A0A0K9QQN4|A0A0K9QQN4_SPIOL Uncharacterized protein OS=Spinacia oleracea OX=3562 GN=SOVF_152450 PE=4 SV=1
TRINITY_DN22159_c0_g1_i2	3262	0	64.79	0	0.62	0	0.41	9.13282	tr|Q40291|Q40291_BETVU ORF167 OS=Beta vulgaris subsp. vulgaris OX=3555 GN=orf167b PE=4 SV=1
TRINITY_DN2435_c1_g1_i4	721	0	65	0	3.58	0	2.38	9.13282	-
TRINITY_DN2576_c0_g1_i11	685	0	64.8	0	3.83	0	2.55	9.13282	-
TRINITY_DN3754_c0_g1_i6	2513	0	65.42	0	0.83	0	0.55	9.13282	tr|A0A0K9QT54|A0A0K9QT54_SPIOL Uncharacterized protein OS=Spinacia oleracea OX=3562 GN=SOVF_149600 PE=4 SV=1
TRINITY_DN5233_c0_g1_i3	1911	0	65.25	0	1.12	0	0.74	9.13282	tr|A0A0K9R9M9|A0A0K9R9M9_SPIOL Uncharacterized protein (Fragment) OS=Spinacia oleracea OX=3562 GN=SOVF_095880 PE=4 SV=1
TRINITY_DN6828_c0_g1_i1	372	0	64.86	0	10.15	0	6.75	9.13282	-
TRINITY_DN8766_c0_g1_i12	1812	0.33	64.99	0.01	1.18	0	0.79	9.13282	tr|A0A0K9QMS4|A0A0K9QMS4_SPIOL Uncharacterized protein OS=Spinacia oleracea OX=3562 GN=SOVF_161460 PE=4 SV=1
TRINITY_DN9448_c0_g1_i13	5628	0	65.35	0	0.35	0	0.24	9.13282	tr|E2DN01|E2DN01_BETVU Uncharacterized protein OS=Beta vulgaris OX=161934 PE=4 SV=1
TRINITY_DN9631_c0_g1_i13	3482	0	65.07	0	0.58	0	0.39	9.13282	tr|A0A0J8B823|A0A0J8B823_BETVU Uncharacterized protein OS=Beta vulgaris subsp. vulgaris OX=3555 GN=BVRB_002100 PE=4 SV=1
TRINITY_DN18748_c0_g1_i1	2947	0	64.31	0	0.69	0	0.46	9.11049	tr|A0A0K9QA51|A0A0K9QA51_SPIOL Uncharacterized protein (Fragment) OS=Spinacia oleracea OX=3562 GN=SOVF_202460 PE=3 SV=1
TRINITY_DN2014_c0_g1_i8	2387	0	64.3	0	0.86	0	0.57	9.11049	tr|A0A0J8C0T8|A0A0J8C0T8_BETVU Uncharacterized protein OS=Beta vulgaris subsp. vulgaris OX=3555 GN=BVRB_7g165050 PE=3 SV=1
TRINITY_DN2310_c0_g1_i3	3373	0	63.66	0	0.59	0	0.39	9.11049	tr|A0A0K9QHP5|A0A0K9QHP5_SPIOL Protein arginine N-methyltransferase OS=Spinacia oleracea OX=3562 GN=SOVF_177920 PE=3 SV=1
TRINITY_DN3047_c0_g1_i4	1471	0	63.83	0	1.47	0	0.98	9.11049	tr|A0A0K9QEI7|A0A0K9QEI7_SPIOL Uncharacterized protein OS=Spinacia oleracea OX=3562 GN=SOVF_188170 PE=4 SV=1
TRINITY_DN3141_c3_g1_i2	517	0	63.67	0	5.65	0	3.76	9.11049	tr|A0A0K9QKA7|A0A0K9QKA7_SPIOL Uncharacterized protein (Fragment) OS=Spinacia oleracea OX=3562 GN=SOVF_169670 PE=4 SV=1
TRINITY_DN315_c1_g1_i6	5247	0	63.54	0	0.37	0	0.25	9.11049	tr|A0A0K9QVS6|A0A0K9QVS6_SPIOL Condensin complex subunit 1 OS=Spinacia oleracea OX=3562 GN=SOVF_135890 PE=3 SV=1
TRINITY_DN3637_c0_g2_i1	503	0	64	0	5.93	0	3.95	9.11049	tr|E7BQD5|E7BQD5_SILLA Gag-pol polyprotein OS=Silene latifolia OX=37657 PE=4 SV=1
TRINITY_DN4727_c0_g1_i17	2707	0	63.88	0	0.75	0	0.5	9.11049	tr|A0A0K9RHK7|A0A0K9RHK7_SPIOL Uncharacterized protein OS=Spinacia oleracea OX=3562 GN=SOVF_065790 PE=4 SV=1
TRINITY_DN5155_c0_g1_i7	2331	0	64.16	0	0.88	0	0.59	9.11049	tr|A0A0K9QQQ2|A0A0K9QQQ2_SPIOL Uncharacterized protein OS=Spinacia oleracea OX=3562 GN=SOVF_152230 PE=4 SV=1
TRINITY_DN5420_c0_g2_i1	2481	0	64.24	0	0.83	0	0.55	9.11049	tr|A0A0K9R533|A0A0K9R533_SPIOL Uncharacterized protein OS=Spinacia oleracea OX=3562 GN=SOVF_105710 PE=4 SV=1
TRINITY_DN6006_c0_g1_i5	1004	0	64.3	0	2.32	0	1.54	9.11049	-
TRINITY_DN7014_c0_g1_i1	508	0	64	0	5.84	0	3.89	9.11049	-
TRINITY_DN1375_c1_g1_i15	2788	0	62.84	0	0.71	0	0.47	9.08781	tr|A0A0K9RJP8|A0A0K9RJP8_SPIOL Uncharacterized protein OS=Spinacia oleracea OX=3562 GN=SOVF_058950 PE=4 SV=1
TRINITY_DN1793_c0_g1_i4	4087	0	62.84	0	0.48	0	0.32	9.08781	tr|A0A0J8B4Z4|A0A0J8B4Z4_BETVU Uncharacterized protein OS=Beta vulgaris subsp. vulgaris OX=3555 GN=BVRB_013890 PE=4 SV=1
TRINITY_DN3632_c0_g1_i8	2921	0	63.27	0	0.68	0	0.45	9.08781	tr|A0A0K9R6R3|A0A0K9R6R3_SPIOL Uncharacterized protein OS=Spinacia oleracea OX=3562 GN=SOVF_100470 PE=4 SV=1
TRINITY_DN579_c0_g1_i21	3652	0	63.2	0	0.54	0	0.36	9.08781	tr|A0A0K9QYF0|A0A0K9QYF0_SPIOL Uncharacterized protein OS=Spinacia oleracea OX=3562 GN=SOVF_132420 PE=4 SV=1
TRINITY_DN759_c0_g1_i10	5087	0	63.02	0	0.38	0	0.25	9.08781	tr|A0A0K9RKD4|A0A0K9RKD4_SPIOL Uncharacterized protein OS=Spinacia oleracea OX=3562 GN=SOVF_056560 PE=4 SV=1
TRINITY_DN9442_c0_g1_i11	1346	0	62.79	0	1.6	0	1.06	9.08781	tr|A0A0K9QV07|A0A0K9QV07_SPIOL Uncharacterized protein OS=Spinacia oleracea OX=3562 GN=SOVF_145210 PE=4 SV=1
TRINITY_DN9722_c0_g1_i1	862	0	63.24	0	2.76	0	1.84	9.08781	tr|A0A0K9RYZ3|A0A0K9RYZ3_SPIOL Auxin-responsive protein OS=Spinacia oleracea OX=3562 GN=SOVF_018400 PE=3 SV=1
TRINITY_DN982_c1_g1_i3	8312	0	63.34	0	0.23	0	0.15	9.08781	tr|A0A0K9R7A1|A0A0K9R7A1_SPIOL Uncharacterized protein OS=Spinacia oleracea OX=3562 GN=SOVF_103520 PE=4 SV=1
TRINITY_DN10965_c0_g1_i4	1978	0	61.72	0	1.02	0	0.68	9.06477	tr|A0A0K9QVN9|A0A0K9QVN9_SPIOL Uncharacterized protein OS=Spinacia oleracea OX=3562 GN=SOVF_136350 PE=4 SV=1
TRINITY_DN1336_c0_g1_i4	6991	0	62.08	0	0.27	0	0.18	9.06477	tr|A0A0K9QJV3|A0A0K9QJV3_SPIOL Uncharacterized protein OS=Spinacia oleracea OX=3562 GN=SOVF_171080 PE=3 SV=1
TRINITY_DN3323_c0_g1_i7	1118	0	62.05	0	1.96	0	1.31	9.06477	tr|A0A0K9RWN5|A0A0K9RWN5_SPIOL Uncharacterized protein OS=Spinacia oleracea OX=3562 GN=SOVF_025740 PE=4 SV=1
TRINITY_DN3508_c2_g1_i2	5056	0	62.32	0	0.38	0	0.25	9.06477	tr|A0A0K9RNH3|A0A0K9RNH3_SPIOL Uncharacterized protein (Fragment) OS=Spinacia oleracea OX=3562 GN=SOVF_052840 PE=4 SV=1
TRINITY_DN3805_c0_g1_i11	2930	0	62.12	0	0.67	0	0.45	9.06477	tr|A0A0K9QUU0|A0A0K9QUU0_SPIOL Uncharacterized protein OS=Spinacia oleracea OX=3562 GN=SOVF_146140 PE=4 SV=1
TRINITY_DN4746_c0_g1_i6	1850	0	62.18	0	1.1	0	0.73	9.06477	tr|A0A0K9RT47|A0A0K9RT47_SPIOL Sodium/hydrogen exchanger OS=Spinacia oleracea OX=3562 GN=SOVF_031830 PE=3 SV=1
TRINITY_DN5641_c0_g1_i8	2433	0	61.81	0	0.81	0	0.54	9.06477	tr|A0A0K9QUJ4|A0A0K9QUJ4_SPIOL Uncharacterized protein OS=Spinacia oleracea OX=3562 GN=SOVF_144830 PE=4 SV=1
TRINITY_DN2416_c1_g1_i7	3642	2.93	1431.32	0.02	12.24	0.02	8.14	9.04317	tr|A0A0K9Q950|A0A0K9Q950_SPIOL Uncharacterized protein OS=Spinacia oleracea OX=3562 GN=SOVF_205540 PE=4 SV=1
TRINITY_DN1065_c0_g1_i2	2626	0	60.8	0	0.74	0	0.49	9.04136	tr|A0A0K9RXS4|A0A0K9RXS4_SPIOL Serine/threonine-protein phosphatase OS=Spinacia oleracea OX=3562 GN=SOVF_016820 PE=3 SV=1
TRINITY_DN14270_c0_g1_i2	1090	0	61	0	1.99	0	1.32	9.04136	tr|A0A0K9QZU7|A0A0K9QZU7_SPIOL Hexosyltransferase OS=Spinacia oleracea OX=3562 GN=SOVF_122730 PE=3 SV=1
TRINITY_DN1485_c4_g1_i1	840	0	61	0	2.75	0	1.83	9.04136	-
TRINITY_DN157_c0_g1_i22	5986	0	61.28	0	0.31	0	0.21	9.04136	tr|A0A0K9R9T7|A0A0K9R9T7_SPIOL Uncharacterized protein OS=Spinacia oleracea OX=3562 GN=SOVF_097130 PE=4 SV=1
TRINITY_DN2503_c0_g1_i12	2895	0.22	60.8	0	0.66	0	0.44	9.04136	tr|A0A0J8BM51|A0A0J8BM51_BETVU Uncharacterized protein OS=Beta vulgaris subsp. vulgaris OX=3555 GN=BVRB_9g206100 PE=4 SV=1
TRINITY_DN2867_c0_g1_i9	3980	0	61.15	0	0.48	0	0.32	9.04136	tr|A0A0K9R8J8|A0A0K9R8J8_SPIOL NAD-dependent protein deacylase OS=Spinacia oleracea OX=3562 GN=SOVF_094770 PE=3 SV=1
TRINITY_DN3830_c0_g1_i10	1547	0	61.36	0	1.33	0	0.89	9.04136	tr|A0A0J8DWZ0|A0A0J8DWZ0_BETVU Uncharacterized protein OS=Beta vulgaris subsp. vulgaris OX=3555 GN=BVRB_008730 PE=4 SV=1
TRINITY_DN3968_c0_g1_i5	3987	0	60.66	0	0.47	0	0.31	9.04136	tr|A0A0K9RXM2|A0A0K9RXM2_SPIOL Uncharacterized protein OS=Spinacia oleracea OX=3562 GN=SOVF_016970 PE=4 SV=1
TRINITY_DN4560_c0_g2_i1	3375	0	61	0	0.57	0	0.38	9.04136	tr|A0A0J8B9F6|A0A0J8B9F6_BETVU Uncharacterized protein OS=Beta vulgaris subsp. vulgaris OX=3555 GN=BVRB_4g097190 PE=3 SV=1
TRINITY_DN6543_c0_g1_i5	2448	0	60.94	0	0.8	0	0.53	9.04136	tr|A0A0K9RAM0|A0A0K9RAM0_SPIOL Uncharacterized protein OS=Spinacia oleracea OX=3562 GN=SOVF_087540 PE=4 SV=1
TRINITY_DN8493_c0_g1_i13	2472	0	60.59	0	0.78	0	0.52	9.04136	tr|A0A0K9QGG6|A0A0K9QGG6_SPIOL Uncharacterized protein (Fragment) OS=Spinacia oleracea OX=3562 GN=SOVF_187450 PE=4 SV=1
TRINITY_DN1479_c0_g1_i6	1505	0	59.68	0	1.34	0	0.89	9.01756	tr|A0A0K9RM42|A0A0K9RM42_SPIOL Uncharacterized protein OS=Spinacia oleracea OX=3562 GN=SOVF_051050 PE=3 SV=1
TRINITY_DN205_c0_g1_i5	1995	0	60.11	0	0.98	0	0.65	9.01756	tr|A0A0J8DXR4|A0A0J8DXR4_BETVU Uncharacterized protein OS=Beta vulgaris subsp. vulgaris OX=3555 GN=BVRB_006000 PE=4 SV=1
TRINITY_DN3134_c0_g1_i2	314	0	60.45	0	13.44	0	8.94	9.01756	tr|A0A0K9RDQ7|A0A0K9RDQ7_SPIOL Uncharacterized protein OS=Spinacia oleracea OX=3562 GN=SOVF_077890 PE=4 SV=1
TRINITY_DN3146_c0_g1_i6	1299	0	59.95	0	1.59	0	1.06	9.01756	tr|A0A1B1RVA0|A0A1B1RVA0_AMATR Transcription factor MYB1 OS=Amaranthus tricolor OX=29722 PE=2 SV=1
TRINITY_DN744_c0_g1_i12	2578	0	60.33	0	0.75	0	0.5	9.01756	tr|A0A0K9QZE6|A0A0K9QZE6_SPIOL Uncharacterized protein OS=Spinacia oleracea OX=3562 GN=SOVF_129140 PE=3 SV=1
TRINITY_DN8826_c0_g1_i1	1040	0	60.42	0	2.09	0	1.39	9.01756	-
TRINITY_DN5084_c0_g1_i2	4974	2.61	1384.14	0.02	8.54	0.01	5.68	8.99499	tr|F4NCG3|F4NCG3_BETVU Uncharacterized protein OS=Beta vulgaris subsp. vulgaris OX=3555 PE=4 SV=1
TRINITY_DN1018_c0_g1_i6	5016	0	59.14	0	0.36	0	0.24	8.99336	tr|A0A0K9QY94|A0A0K9QY94_SPIOL Uncharacterized protein OS=Spinacia oleracea OX=3562 GN=SOVF_133120 PE=4 SV=1
TRINITY_DN2040_c0_g2_i7	3634	0.03	59.44	0	0.51	0	0.34	8.99336	tr|A0A0K9QHW5|A0A0K9QHW5_SPIOL Alpha-mannosidase OS=Spinacia oleracea OX=3562 GN=SOVF_177470 PE=3 SV=1
TRINITY_DN2261_c1_g1_i4	3025	0	58.95	0	0.61	0	0.41	8.99336	tr|A0A0K9S241|A0A0K9S241_SPIOL Uncharacterized protein OS=Spinacia oleracea OX=3562 GN=SOVF_009050 PE=3 SV=1
TRINITY_DN3009_c0_g1_i3	4888	0.01	58.86	0	0.37	0	0.25	8.99336	tr|A0A0K9R0Z2|A0A0K9R0Z2_SPIOL Uncharacterized protein OS=Spinacia oleracea OX=3562 GN=SOVF_118940 PE=4 SV=1
TRINITY_DN3760_c1_g1_i1	366	0	59	0	9.53	0	6.34	8.99336	tr|A0A0K9RSS8|A0A0K9RSS8_SPIOL Transmembrane 9 superfamily member OS=Spinacia oleracea OX=3562 GN=SOVF_033460 PE=3 SV=1
TRINITY_DN589_c0_g1_i6	1045	0	59.32	0	2.04	0	1.36	8.99336	tr|A0A0K9RM82|A0A0K9RM82_SPIOL Uncharacterized protein OS=Spinacia oleracea OX=3562 GN=SOVF_050830 PE=4 SV=1
TRINITY_DN6235_c0_g1_i7	2235	0	59.49	0	0.86	0	0.57	8.99336	-
TRINITY_DN6674_c1_g1_i1	394	0	59.15	0	8.3	0	5.53	8.99336	tr|A0A0K9QQM4|A0A0K9QQM4_SPIOL Uncharacterized protein OS=Spinacia oleracea OX=3562 GN=SOVF_157730 PE=4 SV=1
TRINITY_DN689_c0_g1_i5	1460	0.04	58.58	0	1.36	0	0.9	8.99336	tr|A0A0K9RK53|A0A0K9RK53_SPIOL S-acyltransferase OS=Spinacia oleracea OX=3562 GN=SOVF_057410 PE=3 SV=1
TRINITY_DN101_c0_g1_i11	4273	0	58.36	0	0.42	0	0.28	8.96874	tr|A0A0K9R319|A0A0K9R319_SPIOL Uncharacterized protein (Fragment) OS=Spinacia oleracea OX=3562 GN=SOVF_119030 PE=4 SV=1
TRINITY_DN10434_c0_g1_i9	3345	0	57.71	0	0.54	0	0.36	8.96874	tr|J3SIC5|J3SIC5_BETVU Calmcium/calmodulin-dependent protein kinase CDPK2 OS=Beta vulgaris subsp. vulgaris OX=3555 PE=3 SV=1
TRINITY_DN1061_c0_g1_i5	2501	0	57.85	0	0.74	0	0.49	8.96874	-
TRINITY_DN1678_c2_g1_i2	1044	0.02	57.87	0	1.99	0	1.32	8.96874	tr|A0A0K9R643|A0A0K9R643_SPIOL Uncharacterized protein OS=Spinacia oleracea OX=3562 GN=SOVF_107780 PE=4 SV=1
TRINITY_DN1876_c0_g1_i6	2464	0	57.75	0	0.75	0	0.5	8.96874	tr|A0A0J8C886|A0A0J8C886_BETVU Transcriptional adapter OS=Beta vulgaris subsp. vulgaris OX=3555 GN=BVRB_6g140200 PE=4 SV=1
TRINITY_DN2143_c1_g1_i4	667	0	57.67	0	3.53	0	2.35	8.96874	-
TRINITY_DN2561_c0_g1_i4	4114	0	58.09	0	0.44	0	0.29	8.96874	tr|A0A0K9QD99|A0A0K9QD99_SPIOL Uncharacterized protein OS=Spinacia oleracea OX=3562 GN=SOVF_192340 PE=4 SV=1
TRINITY_DN2784_c0_g1_i3	3351	0	57.82	0	0.54	0	0.36	8.96874	tr|A0A0K9S1C1|A0A0K9S1C1_SPIOL Uncharacterized protein OS=Spinacia oleracea OX=3562 GN=SOVF_005820 PE=4 SV=1
TRINITY_DN28071_c0_g1_i15	2169	0	58.47	0	0.87	0	0.58	8.96874	tr|A0A0K9RY69|A0A0K9RY69_SPIOL Uncharacterized protein OS=Spinacia oleracea OX=3562 GN=SOVF_021970 PE=4 SV=1
TRINITY_DN4521_c0_g1_i3	2488	0	57.83	0	0.74	0	0.49	8.96874	tr|A0A0K9RKS5|A0A0K9RKS5_SPIOL Uncharacterized protein OS=Spinacia oleracea OX=3562 GN=SOVF_061300 PE=4 SV=1
TRINITY_DN4703_c0_g3_i1	466	0	58	0	6.08	0	4.05	8.96874	-
TRINITY_DN5138_c0_g1_i3	3822	0	58.21	0	0.47	0	0.31	8.96874	tr|A0A0K9RNP1|A0A0K9RNP1_SPIOL Uncharacterized protein OS=Spinacia oleracea OX=3562 GN=SOVF_051490 PE=3 SV=1
TRINITY_DN5768_c1_g2_i12	1298	0	57.87	0	1.54	0	1.02	8.96874	-
TRINITY_DN9248_c0_g3_i1	2640	0	57.99	0	0.7	0	0.46	8.96874	tr|A0A0K9R298|A0A0K9R298_SPIOL Uncharacterized protein OS=Spinacia oleracea OX=3562 GN=SOVF_112630 PE=4 SV=1
TRINITY_DN9864_c0_g1_i1	3865	0	58.27	0	0.47	0	0.31	8.96874	-
TRINITY_DN1059_c0_g1_i10	2645	0	57.19	0	0.69	0	0.46	8.9437	tr|A0A0K9RY82|A0A0K9RY82_SPIOL Uncharacterized protein OS=Spinacia oleracea OX=3562 GN=SOVF_021870 PE=4 SV=1
TRINITY_DN11481_c0_g1_i1	3361	0	57	0	0.53	0	0.35	8.9437	tr|A0A0K9QKY0|A0A0K9QKY0_SPIOL Uncharacterized protein OS=Spinacia oleracea OX=3562 GN=SOVF_167570 PE=4 SV=1
TRINITY_DN1435_c0_g1_i16	3458	0	57.26	0	0.52	0	0.34	8.9437	tr|A0A0K9QGN9|A0A0K9QGN9_SPIOL Uncharacterized protein OS=Spinacia oleracea OX=3562 GN=SOVF_186690 PE=4 SV=1
TRINITY_DN18705_c1_g1_i4	1922	0	57.44	0	0.98	0	0.65	8.9437	tr|A0A0K9QP38|A0A0K9QP38_SPIOL Uncharacterized protein (Fragment) OS=Spinacia oleracea OX=3562 GN=SOVF_157600 PE=4 SV=1
TRINITY_DN3057_c0_g1_i7	1741	0	57.45	0	1.09	0	0.73	8.9437	tr|A0A0K9RP36|A0A0K9RP36_SPIOL Uncharacterized protein OS=Spinacia oleracea OX=3562 GN=SOVF_050460 PE=4 SV=1
TRINITY_DN347_c0_g1_i4	3006	0	56.6	0	0.59	0	0.39	8.9437	tr|A0A0K9RD33|A0A0K9RD33_SPIOL Uncharacterized protein OS=Spinacia oleracea OX=3562 GN=SOVF_080530 PE=3 SV=1
TRINITY_DN4188_c0_g1_i1	483	0	57.37	0	5.67	0	3.77	8.9437	-
TRINITY_DN6128_c0_g2_i5	2975	0	56.78	0	0.6	0	0.4	8.9437	tr|A0A0J8B8H8|A0A0J8B8H8_BETVU Uncharacterized protein OS=Beta vulgaris subsp. vulgaris OX=3555 GN=BVRB_5g125880 PE=4 SV=1
TRINITY_DN7624_c0_g1_i7	2997	0	56.9	0	0.6	0	0.4	8.9437	tr|A0A0K9QSW1|A0A0K9QSW1_SPIOL Uncharacterized protein OS=Spinacia oleracea OX=3562 GN=SOVF_145120 PE=4 SV=1
TRINITY_DN879_c0_g4_i1	902	0	57.02	0	2.35	0	1.56	8.9437	tr|A0A0K9RLP3|A0A0K9RLP3_SPIOL Uncharacterized protein OS=Spinacia oleracea OX=3562 GN=SOVF_057940 PE=4 SV=1
TRINITY_DN9248_c0_g1_i5	1429	0.06	57.21	0	1.36	0	0.9	8.9437	tr|A0A0K9R3W8|A0A0K9R3W8_SPIOL Uncharacterized protein OS=Spinacia oleracea OX=3562 GN=SOVF_112630 PE=4 SV=1
TRINITY_DN1007_c0_g1_i2	2488	0	55.9	0	0.72	0	0.48	8.91822	tr|A0A0K9R0W3|A0A0K9R0W3_SPIOL Uncharacterized protein OS=Spinacia oleracea OX=3562 GN=SOVF_119390 PE=4 SV=1
TRINITY_DN1420_c0_g1_i23	3232	0	56.15	0	0.54	0	0.36	8.91822	tr|A0A0K9Q940|A0A0K9Q940_SPIOL Uncharacterized protein OS=Spinacia oleracea OX=3562 GN=SOVF_205650 PE=3 SV=1
TRINITY_DN1997_c0_g1_i8	4974	0	56.1	0	0.35	0	0.23	8.91822	tr|A0A0K9QFE8|A0A0K9QFE8_SPIOL Uncharacterized protein OS=Spinacia oleracea OX=3562 GN=SOVF_191910 PE=4 SV=1
TRINITY_DN2712_c1_g1_i6	428	0	56.32	0	6.82	0	4.54	8.91822	-
TRINITY_DN315_c1_g1_i5	4905	0	56.19	0	0.35	0	0.23	8.91822	tr|A0A0K9QVS6|A0A0K9QVS6_SPIOL Condensin complex subunit 1 OS=Spinacia oleracea OX=3562 GN=SOVF_135890 PE=3 SV=1
TRINITY_DN3420_c0_g2_i18	1297	0	56.25	0	1.49	0	0.99	8.91822	tr|A0A0J8E498|A0A0J8E498_BETVU Uncharacterized protein OS=Beta vulgaris subsp. vulgaris OX=3555 GN=BVRB_4g097200 PE=4 SV=1
TRINITY_DN3488_c1_g1_i4	2404	0	55.56	0	0.74	0	0.49	8.91822	tr|A0A0K9RJE0|A0A0K9RJE0_SPIOL Pectinesterase OS=Spinacia oleracea OX=3562 GN=SOVF_060080 PE=4 SV=1
TRINITY_DN368_c0_g1_i6	1470	0	56.02	0	1.29	0	0.86	8.91822	tr|A0A2Z0PTH5|A0A2Z0PTH5_AMACR Catalase OS=Amaranthus cruentus OX=117272 PE=2 SV=1
TRINITY_DN3974_c0_g2_i6	390	0	55.57	0	7.95	0	5.29	8.91822	-
TRINITY_DN4155_c0_g1_i9	3077	0	55.82	0	0.57	0	0.38	8.91822	tr|A0A0K9QGU0|A0A0K9QGU0_SPIOL Uncharacterized protein OS=Spinacia oleracea OX=3562 GN=SOVF_180920 PE=4 SV=1
TRINITY_DN5291_c0_g1_i4	1710	0	56.42	0	1.09	0	0.73	8.91822	tr|A0A0K9R7E2|A0A0K9R7E2_SPIOL Uncharacterized protein OS=Spinacia oleracea OX=3562 GN=SOVF_097970 PE=4 SV=1
TRINITY_DN5713_c0_g1_i3	3249	0	56.09	0	0.54	0	0.36	8.91822	tr|A0A0K9RJT9|A0A0K9RJT9_SPIOL Uncharacterized protein OS=Spinacia oleracea OX=3562 GN=SOVF_064680 PE=4 SV=1
TRINITY_DN8429_c0_g1_i4	2592	0.01	55.5	0	0.68	0	0.45	8.91822	tr|A0A0K9RXX2|A0A0K9RXX2_SPIOL Uncharacterized protein OS=Spinacia oleracea OX=3562 GN=SOVF_016680 PE=4 SV=1
TRINITY_DN2707_c0_g1_i4	2333	2.29	892.75	0.03	12.28	0.02	8.17	8.91739	sp|P02398|RK12_SPIOL 50S ribosomal protein L12, chloroplastic OS=Spinacia oleracea OX=3562 GN=RPL12 PE=1 SV=2
TRINITY_DN10341_c0_g1_i3	446	0	55.2	0	6.23	0	4.14	8.89228	tr|A0A0J8BB81|A0A0J8BB81_BETVU Uncharacterized protein OS=Beta vulgaris subsp. vulgaris OX=3555 GN=BVRB_3g070320 PE=4 SV=1
TRINITY_DN12987_c0_g1_i13	4538	0	55.01	0	0.37	0	0.25	8.89228	tr|A0A0K9R9C1|A0A0K9R9C1_SPIOL Uncharacterized protein OS=Spinacia oleracea OX=3562 GN=SOVF_092370 PE=4 SV=1
TRINITY_DN22772_c0_g1_i1	929	0	55	0	2.18	0	1.45	8.89228	-
TRINITY_DN2345_c0_g2_i2	3755	0	54.98	0	0.46	0	0.3	8.89228	tr|A0A0K9RFA0|A0A0K9RFA0_SPIOL Uncharacterized protein OS=Spinacia oleracea OX=3562 GN=SOVF_078960 PE=3 SV=1
TRINITY_DN27354_c0_g1_i2	186	0	54.81	0	60.22	0	40.07	8.89228	tr|A0A0J7YP30|A0A0J7YP30_BETVU Uncharacterized protein (Fragment) OS=Beta vulgaris subsp. vulgaris OX=3555 GN=BVRB_036970 PE=4 SV=1
TRINITY_DN356_c0_g1_i7	1992	0	54.57	0	0.89	0	0.59	8.89228	tr|A0A0K9S3P8|A0A0K9S3P8_SPIOL Uncharacterized protein OS=Spinacia oleracea OX=3562 GN=SOVF_001710 PE=4 SV=1
TRINITY_DN3928_c0_g3_i1	593	0	55	0	3.98	0	2.65	8.89228	-
TRINITY_DN3957_c1_g1_i1	4141	0	54.55	0	0.41	0	0.27	8.89228	tr|A0A0K9QSJ7|A0A0K9QSJ7_SPIOL Uncharacterized protein OS=Spinacia oleracea OX=3562 GN=SOVF_146580 PE=4 SV=1
TRINITY_DN3969_c1_g1_i2	218	0	55	0	33.16	0	22.06	8.89228	-
TRINITY_DN4434_c0_g1_i4	2430	0	55.08	0	0.73	0	0.48	8.89228	tr|A0A0K9RLS8|A0A0K9RLS8_SPIOL Uncharacterized protein OS=Spinacia oleracea OX=3562 GN=SOVF_057400 PE=4 SV=1
TRINITY_DN8493_c0_g1_i6	1987	0	54.84	0	0.9	0	0.6	8.89228	tr|A0A0K9QGG6|A0A0K9QGG6_SPIOL Uncharacterized protein (Fragment) OS=Spinacia oleracea OX=3562 GN=SOVF_187450 PE=4 SV=1
TRINITY_DN9289_c0_g1_i1	1234	0	54.95	0	1.55	0	1.03	8.89228	tr|A0A0K9RFR1|A0A0K9RFR1_SPIOL Uncharacterized protein OS=Spinacia oleracea OX=3562 GN=SOVF_071800 PE=4 SV=1
TRINITY_DN9289_c0_g1_i5	4369	0	55.19	0	0.39	0	0.26	8.89228	tr|A0A0K9RNT7|A0A0K9RNT7_SPIOL Uncharacterized protein OS=Spinacia oleracea OX=3562 GN=SOVF_045740 PE=4 SV=1
TRINITY_DN3637_c0_g1_i1	1476	1	466.04	0.02	10.67	0.02	7.1	8.89137	tr|E7BQD5|E7BQD5_SILLA Gag-pol polyprotein OS=Silene latifolia OX=37657 PE=4 SV=1
TRINITY_DN10232_c0_g1_i21	3353	0	53.81	0	0.5	0	0.33	8.86586	tr|A0A0K9RUY0|A0A0K9RUY0_SPIOL Uncharacterized protein OS=Spinacia oleracea OX=3562 GN=SOVF_031030 PE=4 SV=1
TRINITY_DN12323_c0_g1_i2	3674	0	53.57	0	0.45	0	0.3	8.86586	tr|A0A0K9RVM2|A0A0K9RVM2_SPIOL RBR-type E3 ubiquitin transferase OS=Spinacia oleracea OX=3562 GN=SOVF_029080 PE=3 SV=1
TRINITY_DN1264_c0_g1_i5	1602	0	54.22	0	1.13	0	0.75	8.86586	tr|A0A0K9QR83|A0A0K9QR83_SPIOL Uncharacterized protein OS=Spinacia oleracea OX=3562 GN=SOVF_150330 PE=4 SV=1
TRINITY_DN1574_c1_g1_i1	3060	0	54.38	0	0.56	0	0.37	8.86586	tr|A0A0K9S1U1|A0A0K9S1U1_SPIOL Uncharacterized protein OS=Spinacia oleracea OX=3562 GN=SOVF_008850 PE=4 SV=1
TRINITY_DN2414_c0_g1_i5	1409	0	53.8	0	1.3	0	0.86	8.86586	tr|A0A0K9R958|A0A0K9R958_SPIOL Uncharacterized protein OS=Spinacia oleracea OX=3562 GN=SOVF_097610 PE=4 SV=1
TRINITY_DN3508_c3_g1_i3	1570	0	54.45	0	1.16	0	0.77	8.86586	tr|A0A0K9QJD1|A0A0K9QJD1_SPIOL WAT1-related protein OS=Spinacia oleracea OX=3562 GN=SOVF_172670 PE=3 SV=1
TRINITY_DN4166_c0_g1_i7	1770	0	54.27	0	1.01	0	0.67	8.86586	tr|A0A0K9RY84|A0A0K9RY84_SPIOL Uncharacterized protein OS=Spinacia oleracea OX=3562 GN=SOVF_015200 PE=4 SV=1
TRINITY_DN4173_c0_g1_i5	2893	0	53.84	0	0.59	0	0.39	8.86586	tr|A0A0K9QD38|A0A0K9QD38_SPIOL Uncharacterized protein OS=Spinacia oleracea OX=3562 GN=SOVF_192640 PE=4 SV=1
TRINITY_DN4349_c0_g1_i3	3748	0	54.43	0	0.45	0	0.3	8.86586	tr|A0A0K9QIV7|A0A0K9QIV7_SPIOL Uncharacterized protein OS=Spinacia oleracea OX=3562 GN=SOVF_174230 PE=4 SV=1
TRINITY_DN6128_c0_g2_i2	3268	0	53.5	0	0.51	0	0.34	8.86586	tr|A0A0J8B8H8|A0A0J8B8H8_BETVU Uncharacterized protein OS=Beta vulgaris subsp. vulgaris OX=3555 GN=BVRB_5g125880 PE=4 SV=1
TRINITY_DN10786_c0_g1_i1	3899	0	53.08	0	0.42	0	0.28	8.83896	tr|J7LKC0|J7LKC0_CHEAL Calcium dependent protein kinase 6 (Fragment) OS=Chenopodium album OX=3559 GN=CPK6 PE=2 SV=1
TRINITY_DN16862_c0_g1_i6	279	0	53.21	0	15.66	0	10.42	8.83896	-
TRINITY_DN2391_c0_g1_i29	2724	0.19	52.71	0	0.61	0	0.41	8.83896	tr|A0A0K9RBU2|A0A0K9RBU2_SPIOL Uncharacterized protein OS=Spinacia oleracea OX=3562 GN=SOVF_088900 PE=4 SV=1
TRINITY_DN2471_c0_g1_i2	2283	0.02	52.97	0	0.75	0	0.5	8.83896	tr|A0A0K9RAU0|A0A0K9RAU0_SPIOL Uncharacterized protein OS=Spinacia oleracea OX=3562 GN=SOVF_087660 PE=4 SV=1
TRINITY_DN26577_c0_g2_i1	4438	0	52.85	0	0.37	0	0.24	8.83896	tr|A0A140JTI0|A0A140JTI0_9CARY Cytochrome P450 81B80 OS=Fallopia sachalinensis OX=76036 GN=cyp81b80 PE=2 SV=1
TRINITY_DN3112_c0_g1_i19	3895	0	52.95	0	0.42	0	0.28	8.83896	-
TRINITY_DN3315_c0_g1_i1	1718	0.44	52.71	0.01	1.02	0.01	0.68	8.83896	tr|A0A0K9RRM0|A0A0K9RRM0_SPIOL Uncharacterized protein OS=Spinacia oleracea OX=3562 GN=SOVF_042110 PE=4 SV=1
TRINITY_DN4719_c0_g1_i2	3076	0	53.21	0	0.54	0	0.36	8.83896	tr|A0A0K9RZ70|A0A0K9RZ70_SPIOL Exocyst subunit Exo70 family protein OS=Spinacia oleracea OX=3562 GN=SOVF_012200 PE=3 SV=1
TRINITY_DN5060_c0_g1_i11	2088	0	53.4	0	0.83	0	0.55	8.83896	tr|A0A0K9R6T3|A0A0K9R6T3_SPIOL Uncharacterized protein OS=Spinacia oleracea OX=3562 GN=SOVF_100160 PE=4 SV=1
TRINITY_DN5172_c0_g2_i10	3523	0	52.59	0	0.47	0	0.31	8.83896	tr|A0A0J8DZV1|A0A0J8DZV1_BETVU Uncharacterized protein OS=Beta vulgaris subsp. vulgaris OX=3555 GN=BVRB_9g225660 PE=4 SV=1
TRINITY_DN6235_c0_g1_i2	1921	0	53.46	0	0.91	0	0.61	8.83896	-
TRINITY_DN627_c1_g1_i11	300	0	53.11	0	13.11	0	8.72	8.83896	-
TRINITY_DN7675_c0_g2_i5	345	0	53.04	0	9.64	0	6.41	8.83896	-
TRINITY_DN8341_c0_g1_i4	418	0	52.63	0	6.64	0	4.42	8.83896	-
TRINITY_DN9032_c1_g1_i7	2582	0	52.98	0	0.65	0	0.43	8.83896	-
TRINITY_DN9289_c0_g1_i10	2358	0	52.55	0	0.71	0	0.48	8.83896	tr|A0A0K9RFR1|A0A0K9RFR1_SPIOL Uncharacterized protein OS=Spinacia oleracea OX=3562 GN=SOVF_071800 PE=4 SV=1
TRINITY_DN100_c0_g1_i21	2860	0	51.55	0	0.57	0	0.38	8.81154	tr|A0A0K9S1D9|A0A0K9S1D9_SPIOL Uncharacterized protein OS=Spinacia oleracea OX=3562 GN=SOVF_003600 PE=4 SV=1
TRINITY_DN1020_c0_g1_i6	2003	0	51.92	0	0.84	0	0.56	8.81154	tr|A0A0K9QY24|A0A0K9QY24_SPIOL Uncharacterized protein OS=Spinacia oleracea OX=3562 GN=SOVF_128290 PE=4 SV=1
TRINITY_DN1173_c1_g1_i3	2416	0	52.06	0	0.69	0	0.46	8.81154	tr|A0A0K9RI80|A0A0K9RI80_SPIOL Uncharacterized protein OS=Spinacia oleracea OX=3562 GN=SOVF_063820 PE=3 SV=1
TRINITY_DN11836_c0_g1_i4	608	0	51.69	0	3.61	0	2.4	8.81154	tr|A0A0J8E6R9|A0A0J8E6R9_BETVU Uncharacterized protein OS=Beta vulgaris subsp. vulgaris OX=3555 GN=BVRB_3g067910 PE=4 SV=1
TRINITY_DN1853_c0_g3_i2	1954	0	52.37	0	0.87	0	0.58	8.81154	-
TRINITY_DN20550_c0_g1_i1	1930	0	51.66	0	0.87	0	0.58	8.81154	tr|A0A0K9QKM3|A0A0K9QKM3_SPIOL Probable magnesium transporter OS=Spinacia oleracea OX=3562 GN=SOVF_173580 PE=3 SV=1
TRINITY_DN2770_c0_g1_i16	1114	0	51.62	0	1.64	0	1.09	8.81154	-
TRINITY_DN2963_c1_g2_i5	1164	0	51.7	0	1.56	0	1.04	8.81154	tr|A0A0K9QTA8|A0A0K9QTA8_SPIOL Uncharacterized protein OS=Spinacia oleracea OX=3562 GN=SOVF_143960 PE=4 SV=1
TRINITY_DN3651_c0_g1_i11	3618	0	52.34	0	0.45	0	0.3	8.81154	tr|A0A0K9RGW1|A0A0K9RGW1_SPIOL Uncharacterized protein OS=Spinacia oleracea OX=3562 GN=SOVF_068280 PE=4 SV=1
TRINITY_DN3978_c0_g1_i15	2000	0	52.19	0	0.85	0	0.57	8.81154	tr|A0A0K9QG98|A0A0K9QG98_SPIOL Uncharacterized protein OS=Spinacia oleracea OX=3562 GN=SOVF_182500 PE=3 SV=1
TRINITY_DN4173_c0_g1_i20	2591	0	52.29	0	0.64	0	0.43	8.81154	tr|A0A0K9QZ54|A0A0K9QZ54_SPIOL Uncharacterized protein OS=Spinacia oleracea OX=3562 GN=SOVF_131670 PE=4 SV=1
TRINITY_DN4363_c0_g1_i8	2050	0	52.3	0	0.83	0	0.55	8.81154	tr|A0A0K9QSI6|A0A0K9QSI6_SPIOL Uncharacterized protein (Fragment) OS=Spinacia oleracea OX=3562 GN=SOVF_146600 PE=4 SV=1
TRINITY_DN4555_c0_g1_i10	2338	0	51.77	0	0.71	0	0.47	8.81154	tr|A0A0K9RA70|A0A0K9RA70_SPIOL Uncharacterized protein OS=Spinacia oleracea OX=3562 GN=SOVF_089230 PE=4 SV=1
TRINITY_DN4822_c1_g1_i9	2594	0	51.72	0	0.63	0	0.42	8.81154	tr|A0A0K9RN18|A0A0K9RN18_SPIOL Uncharacterized protein OS=Spinacia oleracea OX=3562 GN=SOVF_048350 PE=4 SV=1
TRINITY_DN5680_c0_g5_i3	1521	0	51.97	0	1.15	0	0.76	8.81154	tr|A0A0K9RGE4|A0A0K9RGE4_SPIOL Defective in cullin neddylation protein OS=Spinacia oleracea OX=3562 GN=SOVF_069600 PE=4 SV=1
TRINITY_DN6025_c1_g1_i11	2391	0	51.83	0	0.69	0	0.46	8.81154	tr|A0A0K9QHS5|A0A0K9QHS5_SPIOL Uncharacterized protein OS=Spinacia oleracea OX=3562 GN=SOVF_182460 PE=4 SV=1
TRINITY_DN6072_c0_g2_i1	314	0	51.51	0	11.45	0	7.62	8.81154	-
TRINITY_DN6597_c0_g1_i5	5739	0	51.69	0	0.28	0	0.18	8.81154	tr|A0A0K9RA21|A0A0K9RA21_SPIOL Uncharacterized protein OS=Spinacia oleracea OX=3562 GN=SOVF_090030 PE=4 SV=1
TRINITY_DN7644_c0_g1_i7	671	0	52.24	0	3.17	0	2.11	8.81154	tr|A0A0K9QTH3|A0A0K9QTH3_SPIOL Uncharacterized protein OS=Spinacia oleracea OX=3562 GN=SOVF_143360 PE=3 SV=1
TRINITY_DN7674_c0_g1_i17	1028	0.23	52.14	0.01	1.83	0.01	1.22	8.81154	tr|A0A0K9RIL4|A0A0K9RIL4_SPIOL Uncharacterized protein (Fragment) OS=Spinacia oleracea OX=3562 GN=SOVF_067710 PE=3 SV=1
TRINITY_DN9269_c1_g1_i1	360	0	52.47	0	8.75	0	5.82	8.81154	tr|A0A0K9Q6U6|A0A0K9Q6U6_SPIOL Uncharacterized protein (Fragment) OS=Spinacia oleracea OX=3562 GN=SOVF_215240 PE=4 SV=1
TRINITY_DN9289_c0_g1_i3	4362	0	52.17	0	0.37	0	0.25	8.81154	tr|A0A0K9RNT7|A0A0K9RNT7_SPIOL Uncharacterized protein OS=Spinacia oleracea OX=3562 GN=SOVF_045740 PE=4 SV=1
TRINITY_DN9681_c0_g1_i1	1769	0	52.07	0	0.97	0	0.65	8.81154	tr|A0A346M335|A0A346M335_TALPA Terpene cyclase/mutase family member OS=Talinum paniculatum OX=107604 GN=bAS PE=2 SV=1
TRINITY_DN1101_c11_g1_i14	737	0	51.23	0	2.74	0	1.82	8.78358	-
TRINITY_DN11291_c0_g1_i6	1638	0	51.23	0	1.04	0	0.69	8.78358	tr|A0A0K9RFF2|A0A0K9RFF2_SPIOL Uncharacterized protein OS=Spinacia oleracea OX=3562 GN=SOVF_072960 PE=4 SV=1
TRINITY_DN11797_c0_g1_i3	827	0	50.55	0	2.32	0	1.55	8.78358	-
TRINITY_DN11891_c0_g1_i5	3909	0	51.44	0	0.41	0	0.27	8.78358	tr|A0A0K9QZP4|A0A0K9QZP4_SPIOL Uncharacterized protein (Fragment) OS=Spinacia oleracea OX=3562 GN=SOVF_123260 PE=3 SV=1
TRINITY_DN11916_c0_g1_i2	637	0	51.02	0	3.33	0	2.22	8.78358	tr|E7BQD4|E7BQD4_SILLA Gag-pol polyprotein OS=Silene latifolia OX=37657 PE=4 SV=1
TRINITY_DN12455_c0_g1_i1	2160	0	51	0	0.76	0	0.51	8.78358	tr|E7BQD5|E7BQD5_SILLA Gag-pol polyprotein OS=Silene latifolia OX=37657 PE=4 SV=1
TRINITY_DN16736_c0_g1_i8	2442	0.15	50.68	0	0.66	0	0.44	8.78358	tr|A0A0J8BBW6|A0A0J8BBW6_BETVU Trehalose 6-phosphate phosphatase OS=Beta vulgaris subsp. vulgaris OX=3555 GN=BVRB_3g067590 PE=3 SV=1
TRINITY_DN16871_c0_g1_i6	951	0	50.81	0	1.96	0	1.3	8.78358	tr|A0A0K9R5U3|A0A0K9R5U3_SPIOL Uncharacterized protein OS=Spinacia oleracea OX=3562 GN=SOVF_110060 PE=4 SV=1
TRINITY_DN17895_c0_g1_i3	1030	0	51.14	0	1.79	0	1.19	8.78358	tr|A0A0K9QBC8|A0A0K9QBC8_SPIOL Uncharacterized protein (Fragment) OS=Spinacia oleracea OX=3562 GN=SOVF_203750 PE=4 SV=1
TRINITY_DN2121_c0_g1_i1	1274	0	50.65	0	1.37	0	0.91	8.78358	tr|A0A0K9QRV7|A0A0K9QRV7_SPIOL Uncharacterized protein OS=Spinacia oleracea OX=3562 GN=SOVF_155350 PE=3 SV=1
TRINITY_DN2574_c1_g2_i8	2099	0.12	50.52	0	0.78	0	0.52	8.78358	tr|A0A0J8D1W9|A0A0J8D1W9_BETVU Uncharacterized protein OS=Beta vulgaris subsp. vulgaris OX=3555 GN=BVRB_2g031870 PE=4 SV=1
TRINITY_DN3170_c0_g1_i3	5099	0	51.49	0	0.31	0	0.21	8.78358	tr|A0A0K9QZL2|A0A0K9QZL2_SPIOL Uncharacterized protein OS=Spinacia oleracea OX=3562 GN=SOVF_123600 PE=4 SV=1
TRINITY_DN3508_c2_g1_i7	2600	0.02	50.85	0	0.62	0	0.41	8.78358	tr|A0A0K9RNH3|A0A0K9RNH3_SPIOL Uncharacterized protein (Fragment) OS=Spinacia oleracea OX=3562 GN=SOVF_052840 PE=4 SV=1
TRINITY_DN3508_c2_g1_i9	3547	0	50.58	0	0.44	0	0.3	8.78358	tr|A0A0K9RNH3|A0A0K9RNH3_SPIOL Uncharacterized protein (Fragment) OS=Spinacia oleracea OX=3562 GN=SOVF_052840 PE=4 SV=1
TRINITY_DN4565_c1_g1_i3	503	0	51	0	4.73	0	3.15	8.78358	-
TRINITY_DN5768_c1_g2_i6	4296	0	50.93	0	0.37	0	0.24	8.78358	-
TRINITY_DN7219_c0_g1_i7	3727	0	51.07	0	0.43	0	0.28	8.78358	tr|A0A0K9RG45|A0A0K9RG45_SPIOL 4-alpha-glucanotransferase OS=Spinacia oleracea OX=3562 GN=SOVF_070490 PE=3 SV=1
TRINITY_DN1485_c1_g1_i7	412	0	50.06	0	6.48	0	4.31	8.75508	-
TRINITY_DN16949_c0_g1_i2	2473	0	49.55	0	0.64	0	0.43	8.75508	tr|A0A0K9S063|A0A0K9S063_SPIOL DNA polymerase epsilon subunit OS=Spinacia oleracea OX=3562 GN=SOVF_008690 PE=3 SV=1
TRINITY_DN17030_c0_g1_i6	522	0	50	0	4.37	0	2.91	8.75508	-
TRINITY_DN2458_c0_g2_i6	2081	0	49.93	0	0.78	0	0.52	8.75508	tr|A0A0K9QF86|A0A0K9QF86_SPIOL Uncharacterized protein OS=Spinacia oleracea OX=3562 GN=SOVF_192510 PE=3 SV=1
TRINITY_DN3509_c0_g1_i9	2734	0	49.81	0	0.58	0	0.38	8.75508	tr|A0A0K9RVI4|A0A0K9RVI4_SPIOL Uncharacterized protein OS=Spinacia oleracea OX=3562 GN=SOVF_023940 PE=4 SV=1
TRINITY_DN4344_c0_g1_i3	2779	0	50.32	0	0.57	0	0.38	8.75508	tr|A0A0K9RIL9|A0A0K9RIL9_SPIOL Uncharacterized protein OS=Spinacia oleracea OX=3562 GN=SOVF_067760 PE=4 SV=1
TRINITY_DN898_c0_g1_i5	340	0	49.72	0	9.31	0	6.2	8.75508	-
TRINITY_DN958_c0_g1_i13	648	0	50.34	0	3.21	0	2.13	8.75508	tr|A0A0J8BFX3|A0A0J8BFX3_BETVU Uncharacterized protein OS=Beta vulgaris subsp. vulgaris OX=3555 GN=BVRB_3g067930 PE=4 SV=1
TRINITY_DN3826_c2_g1_i1	1942	1	422.73	0.02	7.11	0.01	4.73	8.75173	tr|Q0PEL6|Q0PEL6_BETVU Putative integrase OS=Beta vulgaris OX=161934 PE=4 SV=1
TRINITY_DN11882_c0_g1_i6	2495	0	49.42	0	0.63	0	0.42	8.726	tr|A0A0K9RX94|A0A0K9RX94_SPIOL Uncharacterized protein OS=Spinacia oleracea OX=3562 GN=SOVF_024390 PE=4 SV=1
TRINITY_DN15043_c0_g2_i1	2484	0	49	0	0.63	0	0.42	8.726	tr|E7BQD4|E7BQD4_SILLA Gag-pol polyprotein OS=Silene latifolia OX=37657 PE=4 SV=1
TRINITY_DN1695_c0_g1_i7	3314	0.33	49	0	0.46	0	0.31	8.726	tr|A0A0K9R1Y1|A0A0K9R1Y1_SPIOL Uncharacterized protein OS=Spinacia oleracea OX=3562 GN=SOVF_122560 PE=4 SV=1
TRINITY_DN1740_c0_g1_i3	2141	0	48.81	0	0.74	0	0.49	8.726	tr|A0A0K9RUT5|A0A0K9RUT5_SPIOL Uncharacterized protein OS=Spinacia oleracea OX=3562 GN=SOVF_025920 PE=4 SV=1
TRINITY_DN2391_c0_g1_i23	3417	0.05	49.49	0	0.45	0	0.3	8.726	tr|A0A0K9RBU2|A0A0K9RBU2_SPIOL Uncharacterized protein OS=Spinacia oleracea OX=3562 GN=SOVF_088900 PE=4 SV=1
TRINITY_DN2414_c2_g1_i2	724	0	49	0	2.68	0	1.79	8.726	-
TRINITY_DN2442_c2_g1_i8	757	0	48.86	0	2.52	0	1.68	8.726	tr|A0A0K9S3T0|A0A0K9S3T0_SPIOL Uncharacterized protein OS=Spinacia oleracea OX=3562 GN=SOVF_001820 PE=4 SV=1
TRINITY_DN2622_c1_g1_i23	2663	0	48.65	0	0.58	0	0.39	8.726	tr|A0A0K9QRI6|A0A0K9QRI6_SPIOL Eukaryotic translation initiation factor 3 subunit K OS=Spinacia oleracea OX=3562 GN=SOVF_149660 PE=3 SV=1
TRINITY_DN3473_c0_g3_i2	927	0	49.38	0	1.97	0	1.31	8.726	-
TRINITY_DN3841_c0_g1_i6	253	0	49.27	0	18.8	0	12.51	8.726	-
TRINITY_DN3933_c0_g5_i2	1435	0	49.32	0	1.17	0	0.78	8.726	tr|A0A0K9Q7I6|A0A0K9Q7I6_SPIOL Uncharacterized protein OS=Spinacia oleracea OX=3562 GN=SOVF_216880 PE=3 SV=1
TRINITY_DN4655_c0_g1_i7	1932	0	49.42	0	0.84	0	0.56	8.726	tr|A0A0K9QFB8|A0A0K9QFB8_SPIOL Uncharacterized protein OS=Spinacia oleracea OX=3562 GN=SOVF_185420 PE=4 SV=1
TRINITY_DN5806_c0_g1_i4	2978	0	48.85	0	0.52	0	0.34	8.726	tr|K4Q0F0|K4Q0F0_BETVU Uncharacterized protein OS=Beta vulgaris OX=161934 PE=4 SV=1
TRINITY_DN7960_c0_g1_i3	668	0	48.55	0	2.97	0	1.97	8.726	-
TRINITY_DN8346_c1_g2_i2	848	0	48.93	0	2.18	0	1.45	8.726	-
TRINITY_DN8643_c0_g1_i5	3989	0	49.18	0	0.38	0	0.25	8.726	tr|A0A0K9R852|A0A0K9R852_SPIOL Uncharacterized protein OS=Spinacia oleracea OX=3562 GN=SOVF_102540 PE=4 SV=1
TRINITY_DN11037_c0_g1_i13	1021	0	47.93	0	1.69	0	1.13	8.69633	tr|A0A0K9QG76|A0A0K9QG76_SPIOL Uncharacterized protein OS=Spinacia oleracea OX=3562 GN=SOVF_188200 PE=4 SV=1
TRINITY_DN11876_c0_g1_i11	829	0	48.35	0	2.22	0	1.47	8.69633	-
TRINITY_DN1336_c0_g1_i18	6973	0	48.36	0	0.21	0	0.14	8.69633	tr|A0A0K9QJV3|A0A0K9QJV3_SPIOL Uncharacterized protein OS=Spinacia oleracea OX=3562 GN=SOVF_171080 PE=3 SV=1
TRINITY_DN1409_c0_g1_i15	1459	0	48.38	0	1.12	0	0.75	8.69633	tr|A0A0K9R1L9|A0A0K9R1L9_SPIOL Uncharacterized protein OS=Spinacia oleracea OX=3562 GN=SOVF_122370 PE=4 SV=1
TRINITY_DN1702_c0_g1_i11	1041	0	47.54	0	1.64	0	1.09	8.69633	tr|A0A0K9QX32|A0A0K9QX32_SPIOL Uncharacterized protein OS=Spinacia oleracea OX=3562 GN=SOVF_131310 PE=4 SV=1
TRINITY_DN18229_c0_g3_i1	386	0	48	0	7	0	4.66	8.69633	-
TRINITY_DN1822_c0_g1_i4	2437	0	48.17	0	0.63	0	0.42	8.69633	tr|A0A0K9RLM3|A0A0K9RLM3_SPIOL Uncharacterized protein OS=Spinacia oleracea OX=3562 GN=SOVF_052410 PE=3 SV=1
TRINITY_DN2305_c2_g1_i15	2357	0.03	48.5	0	0.66	0	0.44	8.69633	tr|A0A0K9S2I1|A0A0K9S2I1_SPIOL Carboxypeptidase OS=Spinacia oleracea OX=3562 GN=SOVF_007550 PE=3 SV=1
TRINITY_DN2952_c0_g1_i3	1471	0	47.93	0	1.1	0	0.73	8.69633	tr|A0A0K9RRK8|A0A0K9RRK8_SPIOL Uncharacterized protein OS=Spinacia oleracea OX=3562 GN=SOVF_042970 PE=4 SV=1
TRINITY_DN3198_c0_g2_i10	4597	0	47.74	0	0.32	0	0.21	8.69633	tr|A0A0K9S0H9|A0A0K9S0H9_SPIOL Uncharacterized protein OS=Spinacia oleracea OX=3562 GN=SOVF_008100 PE=4 SV=1
TRINITY_DN3884_c0_g1_i15	5909	0	48.02	0	0.25	0	0.17	8.69633	tr|A0A0K9QTX5|A0A0K9QTX5_SPIOL Uncharacterized protein OS=Spinacia oleracea OX=3562 GN=SOVF_141700 PE=4 SV=1
TRINITY_DN4583_c0_g1_i5	2576	0	47.58	0	0.59	0	0.39	8.69633	tr|A0A0K9REQ4|A0A0K9REQ4_SPIOL Carboxypeptidase OS=Spinacia oleracea OX=3562 GN=SOVF_075210 PE=3 SV=1
TRINITY_DN4746_c0_g1_i7	2824	0	48.45	0	0.54	0	0.36	8.69633	tr|A0A0K9RT47|A0A0K9RT47_SPIOL Sodium/hydrogen exchanger OS=Spinacia oleracea OX=3562 GN=SOVF_031830 PE=3 SV=1
TRINITY_DN5251_c0_g1_i2	2810	0	48.34	0	0.54	0	0.36	8.69633	tr|A0A0K9QG47|A0A0K9QG47_SPIOL Uncharacterized protein OS=Spinacia oleracea OX=3562 GN=SOVF_182920 PE=4 SV=1
TRINITY_DN5618_c0_g2_i13	3091	0	47.85	0	0.49	0	0.32	8.69633	tr|A0A0K9Q9A8|A0A0K9Q9A8_SPIOL Uncharacterized protein OS=Spinacia oleracea OX=3562 GN=SOVF_205350 PE=4 SV=1
TRINITY_DN6447_c0_g1_i6	2050	0	48.19	0	0.76	0	0.51	8.69633	tr|A0A0K9RVK7|A0A0K9RVK7_SPIOL Uncharacterized protein OS=Spinacia oleracea OX=3562 GN=SOVF_029810 PE=3 SV=1
TRINITY_DN9415_c0_g1_i1	426	0	48	0	5.86	0	3.9	8.69633	tr|A0A0J8B2I6|A0A0J8B2I6_BETVU Uncharacterized protein OS=Beta vulgaris subsp. vulgaris OX=3555 GN=BVRB_009260 PE=4 SV=1
TRINITY_DN11940_c0_g1_i8	2585	0	47.03	0	0.58	0	0.39	8.66603	tr|A0A0K9QGS3|A0A0K9QGS3_SPIOL Uncharacterized protein OS=Spinacia oleracea OX=3562 GN=SOVF_186090 PE=4 SV=1
TRINITY_DN1299_c0_g1_i5	1657	0	47.08	0	0.95	0	0.63	8.66603	tr|A0A0K9QTL5|A0A0K9QTL5_SPIOL Uncharacterized protein (Fragment) OS=Spinacia oleracea OX=3562 GN=SOVF_149440 PE=4 SV=1
TRINITY_DN13165_c0_g2_i1	1015	0	47	0	1.67	0	1.11	8.66603	-
TRINITY_DN1359_c0_g1_i3	2568	0	46.67	0	0.58	0	0.39	8.66603	tr|A0A0J8BKL6|A0A0J8BKL6_BETVU Uncharacterized protein OS=Beta vulgaris subsp. vulgaris OX=3555 GN=BVRB_9g209130 PE=3 SV=1
TRINITY_DN14929_c0_g1_i2	1231	0	46.89	0	1.32	0	0.88	8.66603	-
TRINITY_DN215_c1_g2_i4	2472	0	47.14	0	0.61	0	0.41	8.66603	tr|A0A0K9QU53|A0A0K9QU53_SPIOL Uncharacterized protein OS=Spinacia oleracea OX=3562 GN=SOVF_148050 PE=4 SV=1
TRINITY_DN21987_c1_g1_i2	2606	0	47.41	0	0.58	0	0.39	8.66603	tr|A0A1B2AS18|A0A1B2AS18_CHEQI Beta-amyrin C28-oxidase OS=Chenopodium quinoa OX=63459 PE=2 SV=1
TRINITY_DN2261_c0_g1_i4	2602	0	47.1	0	0.58	0	0.38	8.66603	tr|A0A0K9RSE5|A0A0K9RSE5_SPIOL Cytokinin riboside 5'-monophosphate phosphoribohydrolase OS=Spinacia oleracea OX=3562 GN=SOVF_033910 PE=3 SV=1
TRINITY_DN2261_c1_g1_i3	4376	0	47.23	0	0.33	0	0.22	8.66603	tr|A0A0K9S241|A0A0K9S241_SPIOL Uncharacterized protein OS=Spinacia oleracea OX=3562 GN=SOVF_009050 PE=3 SV=1
TRINITY_DN3134_c0_g1_i1	338	0	46.94	0	8.9	0	5.92	8.66603	tr|A0A0K9RDQ7|A0A0K9RDQ7_SPIOL Uncharacterized protein OS=Spinacia oleracea OX=3562 GN=SOVF_077890 PE=4 SV=1
TRINITY_DN3330_c0_g1_i3	843	0	46.95	0	2.11	0	1.4	8.66603	-
TRINITY_DN3760_c1_g1_i4	383	0	47.17	0	6.98	0	4.65	8.66603	-
TRINITY_DN509_c0_g2_i1	2827	0	47.26	0	0.53	0	0.35	8.66603	tr|A0A0J8CB65|A0A0J8CB65_BETVU Uncharacterized protein OS=Beta vulgaris subsp. vulgaris OX=3555 GN=BVRB_5g113560 PE=4 SV=1
TRINITY_DN5134_c0_g2_i5	1152	0	47.3	0	1.44	0	0.96	8.66603	tr|A0A0K9S2R4|A0A0K9S2R4_SPIOL Uncharacterized protein OS=Spinacia oleracea OX=3562 GN=SOVF_000990 PE=4 SV=1
TRINITY_DN5780_c1_g1_i11	1732	0	47.43	0	0.91	0	0.6	8.66603	tr|A0A0K9R2J5|A0A0K9R2J5_SPIOL Uncharacterized protein (Fragment) OS=Spinacia oleracea OX=3562 GN=SOVF_114190 PE=4 SV=1
TRINITY_DN6162_c0_g1_i3	383	0	46.65	0	6.9	0	4.59	8.66603	-
TRINITY_DN6743_c0_g1_i2	2141	0	47.17	0	0.71	0	0.47	8.66603	tr|A0A0J8BDJ2|A0A0J8BDJ2_BETVU Uncharacterized protein OS=Beta vulgaris subsp. vulgaris OX=3555 GN=BVRB_2g045400 PE=4 SV=1
TRINITY_DN73901_c0_g1_i1	524	0	47.14	0	4.1	0	2.73	8.66603	tr|A0A0K9RK58|A0A0K9RK58_SPIOL Uncharacterized protein (Fragment) OS=Spinacia oleracea OX=3562 GN=SOVF_057080 PE=4 SV=1
TRINITY_DN8259_c0_g1_i4	2018	0	47.14	0	0.76	0	0.51	8.66603	tr|A0A0K9QZD6|A0A0K9QZD6_SPIOL Uncharacterized protein OS=Spinacia oleracea OX=3562 GN=SOVF_123920 PE=4 SV=1
TRINITY_DN9657_c0_g1_i8	2750	0.04	47.38	0	0.55	0	0.36	8.66603	tr|A0A0J8DX14|A0A0J8DX14_BETVU Uncharacterized protein OS=Beta vulgaris subsp. vulgaris OX=3555 GN=BVRB_008630 PE=4 SV=1
TRINITY_DN1094_c0_g1_i5	1300	0	45.96	0	1.22	0	0.81	8.63508	tr|A0A0J8B6W8|A0A0J8B6W8_BETVU Uncharacterized protein OS=Beta vulgaris subsp. vulgaris OX=3555 GN=BVRB_007480 PE=4 SV=1
TRINITY_DN1195_c0_g2_i2	1806	0.06	45.66	0	0.83	0	0.55	8.63508	-
TRINITY_DN1527_c0_g1_i14	1670	0	45.52	0	0.91	0	0.6	8.63508	-
TRINITY_DN16247_c0_g3_i1	2282	0	46	0	0.65	0	0.43	8.63508	tr|E2DMZ5|E2DMZ5_BETVU Uncharacterized protein OS=Beta vulgaris OX=161934 PE=4 SV=1
TRINITY_DN23596_c0_g1_i3	2117	0.47	45.52	0.01	0.7	0	0.46	8.63508	tr|A0A0K9RH06|A0A0K9RH06_SPIOL Purple acid phosphatase OS=Spinacia oleracea OX=3562 GN=SOVF_072100 PE=3 SV=1
TRINITY_DN2770_c0_g1_i13	667	0	45.86	0	2.81	0	1.87	8.63508	-
TRINITY_DN284_c0_g2_i5	731	0	46.42	0	2.51	0	1.67	8.63508	-
TRINITY_DN3134_c0_g1_i4	431	0	45.61	0	5.45	0	3.63	8.63508	tr|A0A0K9RDQ7|A0A0K9RDQ7_SPIOL Uncharacterized protein OS=Spinacia oleracea OX=3562 GN=SOVF_077890 PE=4 SV=1
TRINITY_DN3249_c0_g1_i1	2066	0	46.17	0	0.73	0	0.48	8.63508	tr|A0A0K9QGE2|A0A0K9QGE2_SPIOL Uncharacterized protein OS=Spinacia oleracea OX=3562 GN=SOVF_188650 PE=4 SV=1
TRINITY_DN3293_c0_g1_i8	2109	0	46.23	0	0.71	0	0.47	8.63508	tr|A0A0K9S259|A0A0K9S259_SPIOL Uncharacterized protein OS=Spinacia oleracea OX=3562 GN=SOVF_008590 PE=3 SV=1
TRINITY_DN347_c0_g1_i5	3092	0	46.32	0	0.47	0	0.31	8.63508	tr|A0A0K9RD33|A0A0K9RD33_SPIOL Uncharacterized protein OS=Spinacia oleracea OX=3562 GN=SOVF_080530 PE=3 SV=1
TRINITY_DN440_c0_g2_i4	2929	0	45.65	0	0.49	0	0.33	8.63508	tr|A0A0K9QHY1|A0A0K9QHY1_SPIOL Uncharacterized protein OS=Spinacia oleracea OX=3562 GN=SOVF_182590 PE=4 SV=1
TRINITY_DN449_c0_g3_i12	4748	0.09	45.99	0	0.3	0	0.2	8.63508	tr|A0A0J8BGI3|A0A0J8BGI3_BETVU Uncharacterized protein OS=Beta vulgaris subsp. vulgaris OX=3555 GN=BVRB_2g047360 PE=4 SV=1
TRINITY_DN4926_c0_g1_i3	3553	0	45.72	0	0.4	0	0.27	8.63508	tr|A0A0K9R1H1|A0A0K9R1H1_SPIOL Uncharacterized protein OS=Spinacia oleracea OX=3562 GN=SOVF_124050 PE=4 SV=1
TRINITY_DN5680_c1_g1_i4	1092	0.33	46.14	0.01	1.5	0.01	1	8.63508	tr|A0A0K9QK90|A0A0K9QK90_SPIOL Uncharacterized protein OS=Spinacia oleracea OX=3562 GN=SOVF_174890 PE=4 SV=1
TRINITY_DN7425_c3_g1_i7	625	0	46.25	0	3.1	0	2.06	8.63508	-
TRINITY_DN7805_c0_g2_i1	4314	0	45.98	0	0.33	0	0.22	8.63508	tr|A0A1B3TNU9|A0A1B3TNU9_MIRJA Integrase OS=Mirabilis jalapa OX=3538 PE=4 SV=1
TRINITY_DN8321_c2_g1_i3	737	0	45.87	0	2.45	0	1.63	8.63508	-
TRINITY_DN987_c0_g1_i6	3919	0	46.27	0	0.37	0	0.24	8.63508	tr|A0A0K9QF84|A0A0K9QF84_SPIOL Uncharacterized protein OS=Spinacia oleracea OX=3562 GN=SOVF_191370 PE=3 SV=1
TRINITY_DN11978_c0_g1_i11	3645	0	44.51	0	0.38	0	0.25	8.60345	-
TRINITY_DN12187_c0_g1_i7	2156	0	44.7	0	0.67	0	0.45	8.60345	tr|A0A0K9RIW7|A0A0K9RIW7_SPIOL Uncharacterized protein OS=Spinacia oleracea OX=3562 GN=SOVF_067480 PE=4 SV=1
TRINITY_DN1330_c0_g1_i7	1202	0	44.86	0	1.3	0	0.87	8.60345	tr|A0A0K9QPF7|A0A0K9QPF7_SPIOL Uncharacterized protein OS=Spinacia oleracea OX=3562 GN=SOVF_162300 PE=4 SV=1
TRINITY_DN1375_c1_g1_i18	3547	0	44.98	0	0.4	0	0.26	8.60345	tr|A0A0K9RJP8|A0A0K9RJP8_SPIOL Uncharacterized protein OS=Spinacia oleracea OX=3562 GN=SOVF_058950 PE=4 SV=1
TRINITY_DN157_c0_g1_i6	6210	0	45.13	0	0.22	0	0.15	8.60345	tr|A0A0K9R9T7|A0A0K9R9T7_SPIOL Uncharacterized protein OS=Spinacia oleracea OX=3562 GN=SOVF_097130 PE=4 SV=1
TRINITY_DN1596_c0_g1_i37	2909	0	44.56	0	0.48	0	0.32	8.60345	tr|A0A0K9QUV6|A0A0K9QUV6_SPIOL Uncharacterized protein OS=Spinacia oleracea OX=3562 GN=SOVF_138550 PE=4 SV=1
TRINITY_DN2218_c1_g1_i2	1906	0	44.91	0	0.77	0	0.51	8.60345	tr|A0A0K9RZB7|A0A0K9RZB7_SPIOL Uncharacterized protein OS=Spinacia oleracea OX=3562 GN=SOVF_017110 PE=4 SV=1
TRINITY_DN2352_c0_g1_i4	1044	0	45.23	0	1.56	0	1.03	8.60345	tr|A0A0K9QVN8|A0A0K9QVN8_SPIOL Uncharacterized protein OS=Spinacia oleracea OX=3562 GN=SOVF_141250 PE=4 SV=1
TRINITY_DN2493_c0_g1_i7	3600	0	45.17	0	0.39	0	0.26	8.60345	tr|A0A0J8B4Q2|A0A0J8B4Q2_BETVU Uncharacterized protein OS=Beta vulgaris subsp. vulgaris OX=3555 GN=BVRB_003190 PE=4 SV=1
TRINITY_DN30687_c0_g1_i4	2807	0	45.46	0	0.51	0	0.34	8.60345	tr|A0A0K9R458|A0A0K9R458_SPIOL Uncharacterized protein OS=Spinacia oleracea OX=3562 GN=SOVF_114250 PE=4 SV=1
TRINITY_DN3895_c1_g1_i2	2245	0	45.04	0	0.65	0	0.43	8.60345	tr|A0A0K9RMQ4|A0A0K9RMQ4_SPIOL Uncharacterized protein OS=Spinacia oleracea OX=3562 GN=SOVF_054670 PE=4 SV=1
TRINITY_DN4159_c0_g1_i8	2154	0	44.77	0	0.67	0	0.45	8.60345	tr|A0A0K9QRS0|A0A0K9QRS0_SPIOL Uncharacterized protein (Fragment) OS=Spinacia oleracea OX=3562 GN=SOVF_148390 PE=4 SV=1
TRINITY_DN4756_c0_g1_i2	2789	0	44.9	0	0.51	0	0.34	8.60345	tr|A0A0K9RTU4|A0A0K9RTU4_SPIOL Uncharacterized protein (Fragment) OS=Spinacia oleracea OX=3562 GN=SOVF_029050 PE=4 SV=1
TRINITY_DN5091_c0_g1_i8	3801	0	44.88	0	0.37	0	0.24	8.60345	tr|A0A0K9RGY6|A0A0K9RGY6_SPIOL Uncharacterized protein OS=Spinacia oleracea OX=3562 GN=SOVF_067650 PE=3 SV=1
TRINITY_DN8914_c0_g1_i6	2677	0	45.1	0	0.53	0	0.36	8.60345	tr|A2I5F1|A2I5F1_BETVU Transposon-like protein OS=Beta vulgaris OX=161934 PE=4 SV=1
TRINITY_DN9578_c0_g1_i1	601	0	45	0	3.19	0	2.12	8.60345	-
TRINITY_DN14574_c0_g1_i3	1111	0	44	0	1.4	0	0.93	8.57111	-
TRINITY_DN15519_c0_g1_i1	584	0	44.39	0	3.28	0	2.18	8.57111	-
TRINITY_DN16772_c0_g1_i1	2563	0	43.93	0	0.55	0	0.36	8.57111	tr|A0A0K9RY81|A0A0K9RY81_SPIOL Uncharacterized protein OS=Spinacia oleracea OX=3562 GN=SOVF_016000 PE=4 SV=1
TRINITY_DN19435_c0_g1_i15	4353	0	44.16	0	0.31	0	0.21	8.57111	tr|A0A0K9R8K6|A0A0K9R8K6_SPIOL Uncharacterized protein (Fragment) OS=Spinacia oleracea OX=3562 GN=SOVF_094150 PE=3 SV=1
TRINITY_DN2069_c0_g1_i8	1292	0	43.67	0	1.17	0	0.78	8.57111	tr|A0A0K9RXS6|A0A0K9RXS6_SPIOL Molybdopterin synthase catalytic subunit OS=Spinacia oleracea OX=3562 GN=SOVF_016450 PE=3 SV=1
TRINITY_DN3288_c0_g1_i3	2739	0	43.52	0	0.5	0	0.34	8.57111	tr|A0A0K9RP72|A0A0K9RP72_SPIOL Signal peptidase I OS=Spinacia oleracea OX=3562 GN=SOVF_044460 PE=3 SV=1
TRINITY_DN3750_c0_g1_i8	3927	0	44.49	0	0.35	0	0.23	8.57111	tr|A0A0J8BEA4|A0A0J8BEA4_BETVU Uncharacterized protein OS=Beta vulgaris subsp. vulgaris OX=3555 GN=BVRB_4g093950 PE=4 SV=1
TRINITY_DN3887_c0_g1_i2	1899	0	43.57	0	0.75	0	0.5	8.57111	tr|A0A0K9RDV9|A0A0K9RDV9_SPIOL Uncharacterized protein OS=Spinacia oleracea OX=3562 GN=SOVF_078550 PE=4 SV=1
TRINITY_DN427_c0_g1_i2	3006	0	43.78	0	0.46	0	0.31	8.57111	tr|A0A0K9RI35|A0A0K9RI35_SPIOL Uncharacterized protein (Fragment) OS=Spinacia oleracea OX=3562 GN=SOVF_064340 PE=4 SV=1
TRINITY_DN4618_c4_g1_i1	249	0	43.84	0	17.5	0	11.64	8.57111	-
TRINITY_DN4782_c1_g1_i3	1421	0	43.74	0	1.05	0	0.7	8.57111	tr|A0A0K9QPB3|A0A0K9QPB3_SPIOL Uncharacterized protein OS=Spinacia oleracea OX=3562 GN=SOVF_156820 PE=4 SV=1
TRINITY_DN5439_c0_g1_i2	2176	0	43.83	0	0.65	0	0.43	8.57111	tr|A0A0K9RPB5|A0A0K9RPB5_SPIOL Uncharacterized protein OS=Spinacia oleracea OX=3562 GN=SOVF_049860 PE=4 SV=1
TRINITY_DN6338_c1_g2_i10	1096	0	43.91	0	1.42	0	0.95	8.57111	tr|A0A0K9QNM5|A0A0K9QNM5_SPIOL Uncharacterized protein OS=Spinacia oleracea OX=3562 GN=SOVF_158930 PE=3 SV=1
TRINITY_DN7873_c0_g1_i5	456	0	44	0	4.78	0	3.18	8.57111	-
TRINITY_DN842_c0_g1_i2	3391	0	43.62	0	0.4	0	0.27	8.57111	tr|A0A0K9S3U4|A0A0K9S3U4_SPIOL Vacuolar cation/proton exchanger OS=Spinacia oleracea OX=3562 GN=SOVF_002360 PE=3 SV=1
TRINITY_DN9238_c0_g1_i2	6550	0	44.34	0	0.21	0	0.14	8.57111	tr|A0A0K9RTN4|A0A0K9RTN4_SPIOL Uncharacterized protein OS=Spinacia oleracea OX=3562 GN=SOVF_030530 PE=4 SV=1
TRINITY_DN9262_c1_g1_i1	2878	0.03	44.47	0	0.49	0	0.32	8.57111	tr|A0A0J8BKL1|A0A0J8BKL1_BETVU Aspartate aminotransferase OS=Beta vulgaris subsp. vulgaris OX=3555 GN=BVRB_9g209080 PE=4 SV=1
TRINITY_DN9583_c0_g1_i5	1193	0	43.72	0	1.28	0	0.85	8.57111	tr|A0A0K9RUQ2|A0A0K9RUQ2_SPIOL Uncharacterized protein OS=Spinacia oleracea OX=3562 GN=SOVF_032660 PE=4 SV=1
TRINITY_DN6639_c0_g1_i8	2985	1.37	365.19	0.01	3.85	0.01	2.56	8.53904	tr|A0A0K9QJM3|A0A0K9QJM3_SPIOL NADPH-protochlorophyllide oxidoreductase OS=Spinacia oleracea OX=3562 GN=SOVF_171730 PE=3 SV=1
TRINITY_DN1375_c1_g1_i16	3366	0	43.02	0	0.4	0	0.27	8.53803	tr|A0A0K9RJP8|A0A0K9RJP8_SPIOL Uncharacterized protein OS=Spinacia oleracea OX=3562 GN=SOVF_058950 PE=4 SV=1
TRINITY_DN1541_c0_g1_i2	2591	0	42.58	0	0.52	0	0.35	8.53803	tr|A0A0K9QTA1|A0A0K9QTA1_SPIOL Uncharacterized protein OS=Spinacia oleracea OX=3562 GN=SOVF_144150 PE=4 SV=1
TRINITY_DN2152_c1_g1_i6	477	0	42.73	0	4.31	0	2.87	8.53803	-
TRINITY_DN2199_c1_g3_i2	513	0	43.4	0	3.9	0	2.6	8.53803	-
TRINITY_DN231_c0_g2_i4	1206	0	42.54	0	1.23	0	0.82	8.53803	tr|A0A0J8B885|A0A0J8B885_BETVU CDP-diacylglycerol--inositol 3-phosphatidyltransferase OS=Beta vulgaris subsp. vulgaris OX=3555 GN=BVRB_7g177630 PE=3 SV=1
TRINITY_DN2779_c0_g1_i5	3346	0	43.06	0	0.4	0	0.27	8.53803	tr|A0A0K9RKT5|A0A0K9RKT5_SPIOL Uncharacterized protein OS=Spinacia oleracea OX=3562 GN=SOVF_060710 PE=4 SV=1
TRINITY_DN3179_c0_g1_i11	2266	0	43.45	0	0.62	0	0.41	8.53803	tr|A0A0K9QFW3|A0A0K9QFW3_SPIOL Uncharacterized protein OS=Spinacia oleracea OX=3562 GN=SOVF_183910 PE=4 SV=1
TRINITY_DN3371_c0_g2_i1	300	0	43	0	10.61	0	7.06	8.53803	-
TRINITY_DN3995_c1_g1_i10	3298	0	43.48	0	0.41	0	0.27	8.53803	tr|A2I5F1|A2I5F1_BETVU Transposon-like protein OS=Beta vulgaris OX=161934 PE=4 SV=1
TRINITY_DN5448_c0_g1_i4	3009	0.01	43.03	0	0.45	0	0.3	8.53803	tr|A0A0K9RE29|A0A0K9RE29_SPIOL Uncharacterized protein (Fragment) OS=Spinacia oleracea OX=3562 GN=SOVF_077200 PE=4 SV=1
TRINITY_DN6690_c0_g3_i6	4736	0	42.95	0	0.28	0	0.19	8.53803	tr|A0A0K9RPT2|A0A0K9RPT2_SPIOL Uncharacterized protein OS=Spinacia oleracea OX=3562 GN=SOVF_042640 PE=3 SV=1
TRINITY_DN7611_c0_g1_i4	4113	0.15	42.53	0	0.32	0	0.21	8.53803	tr|A0A0K9RFT4|A0A0K9RFT4_SPIOL Uncharacterized protein OS=Spinacia oleracea OX=3562 GN=SOVF_071620 PE=3 SV=1
TRINITY_DN2391_c0_g1_i34	2707	0.52	360.38	0.01	4.22	0	2.81	8.51914	tr|A0A0K9RBU2|A0A0K9RBU2_SPIOL Uncharacterized protein OS=Spinacia oleracea OX=3562 GN=SOVF_088900 PE=4 SV=1
TRINITY_DN1064_c1_g1_i4	3314	0	41.63	0	0.39	0	0.26	8.50418	tr|A0A0K9RL01|A0A0K9RL01_SPIOL Uncharacterized protein OS=Spinacia oleracea OX=3562 GN=SOVF_054870 PE=4 SV=1
TRINITY_DN11282_c0_g4_i1	562	0	42.48	0	3.32	0	2.21	8.50418	-
TRINITY_DN11416_c0_g1_i6	2567	0	42.46	0	0.53	0	0.35	8.50418	tr|A0A0K9RY04|A0A0K9RY04_SPIOL Uncharacterized protein OS=Spinacia oleracea OX=3562 GN=SOVF_021260 PE=4 SV=1
TRINITY_DN11718_c0_g1_i4	1099	0	41.62	0	1.35	0	0.89	8.50418	tr|A0A0K9QSZ6|A0A0K9QSZ6_SPIOL Uncharacterized protein OS=Spinacia oleracea OX=3562 GN=SOVF_144550 PE=4 SV=1
TRINITY_DN1409_c0_g1_i1	3105	0	42.29	0	0.43	0	0.28	8.50418	tr|A0A0K9QZY6|A0A0K9QZY6_SPIOL Uncharacterized protein OS=Spinacia oleracea OX=3562 GN=SOVF_122370 PE=4 SV=1
TRINITY_DN1501_c1_g1_i17	2892	0	42.42	0	0.46	0	0.31	8.50418	tr|A0A0K9QP54|A0A0K9QP54_SPIOL Uncharacterized protein (Fragment) OS=Spinacia oleracea OX=3562 GN=SOVF_156960 PE=4 SV=1
TRINITY_DN1789_c0_g1_i7	5841	0	42.09	0	0.22	0	0.15	8.50418	tr|A0A0K9RYP7|A0A0K9RYP7_SPIOL Uncharacterized protein OS=Spinacia oleracea OX=3562 GN=SOVF_019020 PE=4 SV=1
TRINITY_DN2607_c0_g1_i6	2076	0	41.91	0	0.65	0	0.44	8.50418	tr|A0A0K9Q9T2|A0A0K9Q9T2_SPIOL Uncharacterized protein OS=Spinacia oleracea OX=3562 GN=SOVF_203640 PE=4 SV=1
TRINITY_DN2772_c1_g1_i1	586	0	42	0	3.09	0	2.06	8.50418	-
TRINITY_DN2927_c0_g1_i8	5026	0	41.53	0	0.25	0	0.17	8.50418	tr|A0A0K9RE25|A0A0K9RE25_SPIOL Uncharacterized protein (Fragment) OS=Spinacia oleracea OX=3562 GN=SOVF_081470 PE=4 SV=1
TRINITY_DN4144_c0_g1_i15	835	0	41.62	0	1.89	0	1.26	8.50418	-
TRINITY_DN4456_c0_g2_i17	4888	0	42.35	0	0.27	0	0.18	8.50418	tr|A0A0K9QDS3|A0A0K9QDS3_SPIOL Uncharacterized protein (Fragment) OS=Spinacia oleracea OX=3562 GN=SOVF_190600 PE=4 SV=1
TRINITY_DN45_c3_g2_i2	289	0.21	42.5	0.05	11.46	0.04	7.63	8.50418	-
TRINITY_DN4960_c1_g2_i2	1431	0	42.21	0	1	0	0.67	8.50418	tr|A0A0K9R167|A0A0K9R167_SPIOL Uncharacterized protein (Fragment) OS=Spinacia oleracea OX=3562 GN=SOVF_118610 PE=4 SV=1
TRINITY_DN558_c0_g1_i8	2037	0	42.29	0	0.67	0	0.45	8.50418	tr|A0A0K9Q8S6|A0A0K9Q8S6_SPIOL Uncharacterized protein (Fragment) OS=Spinacia oleracea OX=3562 GN=SOVF_206830 PE=4 SV=1
TRINITY_DN5928_c0_g2_i2	673	0.13	41.99	0.01	2.54	0.01	1.69	8.50418	tr|A0A0K9RHH8|A0A0K9RHH8_SPIOL Uncharacterized protein OS=Spinacia oleracea OX=3562 GN=SOVF_072200 PE=3 SV=1
TRINITY_DN6041_c1_g2_i22	2807	0	41.74	0	0.47	0	0.31	8.50418	tr|A0A0K9RUX0|A0A0K9RUX0_SPIOL Uncharacterized protein (Fragment) OS=Spinacia oleracea OX=3562 GN=SOVF_026490 PE=4 SV=1
TRINITY_DN6422_c2_g1_i2	8027	0	42.29	0	0.16	0	0.11	8.50418	tr|A0A0K9QFU1|A0A0K9QFU1_SPIOL Uncharacterized protein OS=Spinacia oleracea OX=3562 GN=SOVF_190340 PE=4 SV=1
TRINITY_DN6447_c0_g1_i7	2538	0	42.28	0	0.53	0	0.35	8.50418	tr|A0A0K9RVK7|A0A0K9RVK7_SPIOL Uncharacterized protein OS=Spinacia oleracea OX=3562 GN=SOVF_029810 PE=3 SV=1
TRINITY_DN7149_c0_g2_i2	842	0	41.86	0	1.88	0	1.25	8.50418	-
TRINITY_DN8621_c0_g1_i4	3060	0.01	42.43	0	0.44	0	0.29	8.50418	tr|A0A0K9RII3|A0A0K9RII3_SPIOL Uncharacterized protein OS=Spinacia oleracea OX=3562 GN=SOVF_062780 PE=4 SV=1
TRINITY_DN893_c0_g2_i15	1749	0	41.53	0	0.78	0	0.52	8.50418	tr|A0A0K9S293|A0A0K9S293_SPIOL Uncharacterized protein OS=Spinacia oleracea OX=3562 GN=SOVF_001770 PE=4 SV=1
TRINITY_DN9212_c0_g1_i5	1042	0	42.49	0	1.46	0	0.97	8.50418	tr|A0A0K9R475|A0A0K9R475_SPIOL Uncharacterized protein OS=Spinacia oleracea OX=3562 GN=SOVF_114030 PE=4 SV=1
TRINITY_DN9242_c0_g1_i2	2525	0	41.71	0	0.53	0	0.35	8.50418	tr|A0A0K9QI68|A0A0K9QI68_SPIOL F-actin-capping protein subunit beta OS=Spinacia oleracea OX=3562 GN=SOVF_176390 PE=3 SV=1
TRINITY_DN1075_c1_g2_i5	360	0	41	0	6.84	0	4.55	8.46951	-
TRINITY_DN11408_c1_g1_i9	2516	0	41.15	0	0.52	0	0.35	8.46951	tr|J3S7K7|J3S7K7_BETVU Mariner transposase OS=Beta vulgaris subsp. vulgaris OX=3555 PE=4 SV=1
TRINITY_DN1331_c0_g2_i1	1296	0	40.84	0	1.09	0	0.72	8.46951	tr|A2I5F1|A2I5F1_BETVU Transposon-like protein OS=Beta vulgaris OX=161934 PE=4 SV=1
TRINITY_DN1675_c0_g1_i19	1679	0	41.35	0	0.82	0	0.54	8.46951	tr|A0A0K9RU18|A0A0K9RU18_SPIOL Uncharacterized protein OS=Spinacia oleracea OX=3562 GN=SOVF_028510 PE=4 SV=1
TRINITY_DN17103_c0_g1_i5	4560	0.37	40.7	0	0.27	0	0.18	8.46951	tr|A0A0K9Q7P0|A0A0K9Q7P0_SPIOL Uncharacterized protein OS=Spinacia oleracea OX=3562 GN=SOVF_211070 PE=4 SV=1
TRINITY_DN18758_c0_g4_i2	2508	0	41.08	0	0.52	0	0.35	8.46951	tr|A0A0K9RP69|A0A0K9RP69_SPIOL Uncharacterized protein OS=Spinacia oleracea OX=3562 GN=SOVF_050620 PE=4 SV=1
TRINITY_DN18918_c0_g2_i4	813	0	41.23	0	1.94	0	1.29	8.46951	-
TRINITY_DN2098_c1_g1_i2	993	0	41	0	1.5	0	1	8.46951	tr|A0A0K9QM90|A0A0K9QM90_SPIOL Uncharacterized protein OS=Spinacia oleracea OX=3562 GN=SOVF_168490 PE=4 SV=1
TRINITY_DN21630_c0_g3_i2	589	0	41	0	2.99	0	1.99	8.46951	-
TRINITY_DN230_c0_g1_i2	1069	0	41.34	0	1.38	0	0.92	8.46951	-
TRINITY_DN2867_c0_g1_i12	1806	0	40.7	0	0.74	0	0.49	8.46951	tr|A0A0K9R8J8|A0A0K9R8J8_SPIOL NAD-dependent protein deacylase OS=Spinacia oleracea OX=3562 GN=SOVF_094770 PE=3 SV=1
TRINITY_DN3057_c0_g1_i1	1693	0	41.45	0	0.81	0	0.54	8.46951	tr|A0A0K9RP36|A0A0K9RP36_SPIOL Uncharacterized protein OS=Spinacia oleracea OX=3562 GN=SOVF_050460 PE=4 SV=1
TRINITY_DN3572_c0_g1_i11	2915	0	41.46	0	0.45	0	0.3	8.46951	tr|A0A0K9RZH1|A0A0K9RZH1_SPIOL Uncharacterized protein OS=Spinacia oleracea OX=3562 GN=SOVF_011300 PE=4 SV=1
TRINITY_DN3836_c0_g1_i2	2552	0	40.76	0	0.51	0	0.34	8.46951	tr|A0A0K9QFK3|A0A0K9QFK3_SPIOL Uncharacterized protein OS=Spinacia oleracea OX=3562 GN=SOVF_184660 PE=3 SV=1
TRINITY_DN5497_c0_g1_i2	1443	0	41.35	0	0.97	0	0.65	8.46951	tr|A0A0J8B7C8|A0A0J8B7C8_BETVU Uncharacterized protein OS=Beta vulgaris subsp. vulgaris OX=3555 GN=BVRB_005810 PE=4 SV=1
TRINITY_DN7843_c0_g3_i1	1372	0	41	0	1.02	0	0.68	8.46951	-
TRINITY_DN8767_c0_g1_i15	1775	0.04	40.85	0	0.76	0	0.51	8.46951	tr|A0A0K9RCH8|A0A0K9RCH8_SPIOL Uncharacterized protein OS=Spinacia oleracea OX=3562 GN=SOVF_088190 PE=4 SV=1
TRINITY_DN10146_c0_g2_i10	1725	0	40.15	0	0.77	0	0.51	8.43399	tr|A0A0K9RRK0|A0A0K9RRK0_SPIOL Uncharacterized protein OS=Spinacia oleracea OX=3562 GN=SOVF_036830 PE=4 SV=1
TRINITY_DN11304_c1_g1_i9	1387	0	39.63	0	0.97	0	0.65	8.43399	tr|A0A0K9QRT2|A0A0K9QRT2_SPIOL Uncharacterized protein OS=Spinacia oleracea OX=3562 GN=SOVF_153940 PE=4 SV=1
TRINITY_DN11876_c0_g1_i6	901	0	39.87	0	1.64	0	1.09	8.43399	-
TRINITY_DN1190_c0_g1_i7	3984	0	40.08	0	0.31	0	0.21	8.43399	tr|A0A0K9QL42|A0A0K9QL42_SPIOL Uncharacterized protein OS=Spinacia oleracea OX=3562 GN=SOVF_166780 PE=4 SV=1
TRINITY_DN13777_c0_g1_i4	2459	0	40.31	0	0.52	0	0.35	8.43399	tr|A0A0K9RRI4|A0A0K9RRI4_SPIOL Uncharacterized protein OS=Spinacia oleracea OX=3562 GN=SOVF_036660 PE=4 SV=1
TRINITY_DN14080_c0_g1_i5	5734	0.22	39.53	0	0.21	0	0.14	8.43399	tr|A0A0K9RSQ0|A0A0K9RSQ0_SPIOL Uncharacterized protein OS=Spinacia oleracea OX=3562 GN=SOVF_033180 PE=3 SV=1
TRINITY_DN14475_c2_g5_i1	1259	0	39.55	0	1.09	0	0.72	8.43399	-
TRINITY_DN14544_c0_g1_i1	1831	0	39.77	0	0.71	0	0.48	8.43399	tr|A0A0K9S0P1|A0A0K9S0P1_SPIOL Uncharacterized protein OS=Spinacia oleracea OX=3562 GN=SOVF_013150 PE=4 SV=1
TRINITY_DN16277_c0_g1_i1	926	0	40	0	1.59	0	1.06	8.43399	-
TRINITY_DN3001_c0_g1_i10	2113	0.02	39.93	0	0.61	0	0.41	8.43399	tr|A0A0K9QSI9|A0A0K9QSI9_SPIOL Uncharacterized protein (Fragment) OS=Spinacia oleracea OX=3562 GN=SOVF_152950 PE=4 SV=1
TRINITY_DN3442_c0_g1_i5	1853	0	39.78	0	0.7	0	0.47	8.43399	tr|A0A0K9S2Z1|A0A0K9S2Z1_SPIOL Uncharacterized protein OS=Spinacia oleracea OX=3562 GN=SOVF_005970 PE=4 SV=1
TRINITY_DN3529_c0_g1_i13	1588	0	39.68	0	0.84	0	0.56	8.43399	-
TRINITY_DN389_c0_g1_i29	3475	0	40.48	0	0.36	0	0.24	8.43399	tr|A0A0J8BFC7|A0A0J8BFC7_BETVU Uncharacterized protein OS=Beta vulgaris subsp. vulgaris OX=3555 GN=BVRB_019340 PE=4 SV=1
TRINITY_DN4618_c1_g1_i1	567	0	40.29	0	3.11	0	2.07	8.43399	-
TRINITY_DN5185_c0_g1_i18	2764	0.31	39.98	0	0.46	0	0.3	8.43399	tr|A0A0K9R6G5|A0A0K9R6G5_SPIOL Uncharacterized protein OS=Spinacia oleracea OX=3562 GN=SOVF_106490 PE=4 SV=1
TRINITY_DN5806_c0_g1_i1	1079	0	40.47	0	1.34	0	0.89	8.43399	tr|K4Q0F0|K4Q0F0_BETVU Uncharacterized protein OS=Beta vulgaris OX=161934 PE=4 SV=1
TRINITY_DN5965_c0_g1_i8	1173	0	39.54	0	1.18	0	0.79	8.43399	tr|A0A0K9R7D9|A0A0K9R7D9_SPIOL Uncharacterized protein OS=Spinacia oleracea OX=3562 GN=SOVF_102900 PE=4 SV=1
TRINITY_DN6032_c0_g2_i15	1404	0	39.51	0	0.96	0	0.64	8.43399	tr|A0A0K9QJN2|A0A0K9QJN2_SPIOL Uncharacterized protein OS=Spinacia oleracea OX=3562 GN=SOVF_176740 PE=4 SV=1
TRINITY_DN6787_c0_g1_i19	4793	0	39.63	0	0.25	0	0.17	8.43399	tr|A0A0K9RKJ5|A0A0K9RKJ5_SPIOL Uncharacterized protein OS=Spinacia oleracea OX=3562 GN=SOVF_056220 PE=4 SV=1
TRINITY_DN7494_c0_g1_i3	3036	0	40.11	0	0.42	0	0.28	8.43399	tr|A0A0K9RR36|A0A0K9RR36_SPIOL Uncharacterized protein OS=Spinacia oleracea OX=3562 GN=SOVF_038110 PE=3 SV=1
TRINITY_DN8845_c0_g1_i4	2351	0	40.24	0	0.55	0	0.37	8.43399	tr|A0A0K9RFZ7|A0A0K9RFZ7_SPIOL Uncharacterized protein OS=Spinacia oleracea OX=3562 GN=SOVF_070670 PE=4 SV=1
TRINITY_DN8958_c0_g1_i3	2380	0	39.51	0	0.53	0	0.35	8.43399	tr|A0A0K9S193|A0A0K9S193_SPIOL Uncharacterized protein OS=Spinacia oleracea OX=3562 GN=SOVF_010990 PE=4 SV=1
TRINITY_DN10393_c0_g1_i15	1069	0	39.38	0	1.32	0	0.88	8.39757	tr|A0A0K9RMT2|A0A0K9RMT2_SPIOL Uncharacterized protein OS=Spinacia oleracea OX=3562 GN=SOVF_048910 PE=3 SV=1
TRINITY_DN10536_c0_g1_i16	5448	0	39.37	0	0.22	0	0.15	8.39757	tr|A0A0J8C8Z6|A0A0J8C8Z6_BETVU Uncharacterized protein OS=Beta vulgaris subsp. vulgaris OX=3555 GN=BVRB_6g140260 PE=3 SV=1
TRINITY_DN14047_c0_g1_i1	346	0	38.77	0	7.01	0	4.66	8.39757	tr|E7BQD5|E7BQD5_SILLA Gag-pol polyprotein OS=Silene latifolia OX=37657 PE=4 SV=1
TRINITY_DN14758_c0_g2_i7	2723	0	39.34	0	0.46	0	0.3	8.39757	tr|A0A0J8CRQ1|A0A0J8CRQ1_BETVU Uncharacterized protein OS=Beta vulgaris subsp. vulgaris OX=3555 GN=BVRB_3g050770 PE=4 SV=1
TRINITY_DN17114_c0_g1_i1	3091	0	39.09	0	0.4	0	0.26	8.39757	tr|A0A0K9QSA4|A0A0K9QSA4_SPIOL Uncharacterized protein (Fragment) OS=Spinacia oleracea OX=3562 GN=SOVF_152270 PE=4 SV=1
TRINITY_DN1921_c0_g1_i4	2539	0	38.69	0	0.49	0	0.32	8.39757	-
TRINITY_DN2174_c0_g1_i10	2054	0	39.33	0	0.62	0	0.41	8.39757	tr|K4Q1D7|K4Q1D7_BETVU Uncharacterized protein OS=Beta vulgaris OX=161934 PE=4 SV=1
TRINITY_DN2416_c1_g1_i6	4065	0.21	38.94	0	0.3	0	0.2	8.39757	tr|A0A0K9Q950|A0A0K9Q950_SPIOL Uncharacterized protein OS=Spinacia oleracea OX=3562 GN=SOVF_205540 PE=4 SV=1
TRINITY_DN25825_c0_g1_i2	1277	0	38.82	0	1.05	0	0.7	8.39757	tr|A0A0K9QRL1|A0A0K9QRL1_SPIOL Uncharacterized protein OS=Spinacia oleracea OX=3562 GN=SOVF_148920 PE=3 SV=1
TRINITY_DN2758_c0_g1_i8	729	0	39.48	0	2.14	0	1.43	8.39757	-
TRINITY_DN2911_c0_g1_i18	8576	0	39.49	0	0.14	0	0.09	8.39757	tr|A0A0K9QRC1|A0A0K9QRC1_SPIOL Uncharacterized protein OS=Spinacia oleracea OX=3562 GN=SOVF_155410 PE=4 SV=1
TRINITY_DN3179_c0_g1_i5	2350	0	39.08	0	0.53	0	0.35	8.39757	tr|A0A0K9QFW3|A0A0K9QFW3_SPIOL Uncharacterized protein OS=Spinacia oleracea OX=3562 GN=SOVF_183910 PE=4 SV=1
TRINITY_DN3341_c0_g1_i1	2219	0	38.68	0	0.56	0	0.37	8.39757	tr|A0A0K9S1H5|A0A0K9S1H5_SPIOL Uncharacterized protein OS=Spinacia oleracea OX=3562 GN=SOVF_005320 PE=4 SV=1
TRINITY_DN3362_c0_g1_i2	3334	0	38.75	0	0.36	0	0.24	8.39757	tr|A0A0K9QST9|A0A0K9QST9_SPIOL Uncharacterized protein OS=Spinacia oleracea OX=3562 GN=SOVF_152250 PE=4 SV=1
TRINITY_DN3737_c0_g2_i1	3936	0	39.39	0	0.31	0	0.21	8.39757	tr|A0A0K9RZG4|A0A0K9RZG4_SPIOL Uncharacterized protein OS=Spinacia oleracea OX=3562 GN=SOVF_017380 PE=3 SV=1
TRINITY_DN4232_c0_g2_i5	1875	0	39.1	0	0.68	0	0.45	8.39757	tr|A0A0K9R4C0|A0A0K9R4C0_SPIOL Uncharacterized protein OS=Spinacia oleracea OX=3562 GN=SOVF_108210 PE=4 SV=1
TRINITY_DN4525_c1_g1_i9	1695	0	39.19	0	0.77	0	0.51	8.39757	tr|A0A0K9QUX2|A0A0K9QUX2_SPIOL Uncharacterized protein OS=Spinacia oleracea OX=3562 GN=SOVF_143870 PE=3 SV=1
TRINITY_DN467_c0_g1_i21	2621	0	39.14	0	0.47	0	0.32	8.39757	tr|A0A0K9RA11|A0A0K9RA11_SPIOL Uncharacterized protein OS=Spinacia oleracea OX=3562 GN=SOVF_094540 PE=4 SV=1
TRINITY_DN4807_c0_g1_i9	5291	0	39.37	0	0.23	0	0.15	8.39757	tr|A0A0K9QI05|A0A0K9QI05_SPIOL Uncharacterized protein OS=Spinacia oleracea OX=3562 GN=SOVF_176840 PE=4 SV=1
TRINITY_DN5117_c0_g2_i6	1239	0	39.05	0	1.09	0	0.73	8.39757	tr|A0A0K9QDS3|A0A0K9QDS3_SPIOL Uncharacterized protein (Fragment) OS=Spinacia oleracea OX=3562 GN=SOVF_190600 PE=4 SV=1
TRINITY_DN599_c0_g1_i6	3426	0	39.34	0	0.36	0	0.24	8.39757	tr|A0A0K9QP96|A0A0K9QP96_SPIOL Uncharacterized protein OS=Spinacia oleracea OX=3562 GN=SOVF_156920 PE=3 SV=1
TRINITY_DN6317_c0_g3_i1	688	0	39	0	2.29	0	1.52	8.39757	-
TRINITY_DN6974_c0_g1_i3	1773	0	39.27	0	0.73	0	0.49	8.39757	tr|A0A0K9RF75|A0A0K9RF75_SPIOL Uncharacterized protein OS=Spinacia oleracea OX=3562 GN=SOVF_073090 PE=4 SV=1
TRINITY_DN8276_c1_g1_i1	979	0	39	0	1.45	0	0.97	8.39757	-
TRINITY_DN8616_c0_g1_i6	531	0	39.01	0	3.32	0	2.21	8.39757	-
TRINITY_DN8624_c0_g1_i16	887	0	38.92	0	1.64	0	1.09	8.39757	-
TRINITY_DN30508_c0_g1_i1	3610	3	906	0.03	7.82	0.02	5.2	8.3838	tr|J3S7K7|J3S7K7_BETVU Mariner transposase OS=Beta vulgaris subsp. vulgaris OX=3555 PE=4 SV=1
TRINITY_DN11620_c0_g3_i3	2159	0	38.21	0	0.57	0	0.38	8.36021	tr|A0A0K9R5U6|A0A0K9R5U6_SPIOL 5-formyltetrahydrofolate cyclo-ligase OS=Spinacia oleracea OX=3562 GN=SOVF_103230 PE=3 SV=1
TRINITY_DN1341_c0_g1_i3	1095	0	38.08	0	1.24	0	0.82	8.36021	tr|A0A0K9RER8|A0A0K9RER8_SPIOL Auxin-responsive protein OS=Spinacia oleracea OX=3562 GN=SOVF_074790 PE=3 SV=1
TRINITY_DN1459_c0_g1_i7	3277	0	37.77	0	0.36	0	0.24	8.36021	tr|A0A0J8E4H8|A0A0J8E4H8_BETVU Uncharacterized protein OS=Beta vulgaris subsp. vulgaris OX=3555 GN=BVRB_4g096440 PE=4 SV=1
TRINITY_DN1608_c0_g1_i9	1016	0	37.84	0	1.34	0	0.89	8.36021	tr|A0A0K9RRB6|A0A0K9RRB6_SPIOL Uncharacterized protein OS=Spinacia oleracea OX=3562 GN=SOVF_037250 PE=4 SV=1
TRINITY_DN19341_c0_g3_i1	1142	0	37.58	0	1.16	0	0.77	8.36021	-
TRINITY_DN2232_c0_g1_i9	2607	0	38.44	0	0.47	0	0.31	8.36021	tr|A0A0J8BB91|A0A0J8BB91_BETVU Uncharacterized protein OS=Beta vulgaris subsp. vulgaris OX=3555 GN=BVRB_4g095370 PE=4 SV=1
TRINITY_DN24555_c0_g1_i10	1554	0	37.85	0	0.82	0	0.54	8.36021	tr|A0A0K9RIJ0|A0A0K9RIJ0_SPIOL Uncharacterized protein OS=Spinacia oleracea OX=3562 GN=SOVF_062950 PE=3 SV=1
TRINITY_DN2695_c0_g2_i11	1085	0	38.05	0	1.25	0	0.83	8.36021	tr|A0A0K9RYY2|A0A0K9RYY2_SPIOL Alpha-1,3-glucosyltransferase OS=Spinacia oleracea OX=3562 GN=SOVF_018370 PE=3 SV=1
TRINITY_DN3320_c1_g1_i12	746	0	37.7	0	1.98	0	1.32	8.36021	-
TRINITY_DN3760_c1_g1_i5	377	0	38.44	0	5.86	0	3.9	8.36021	tr|A0A0K9RSS8|A0A0K9RSS8_SPIOL Transmembrane 9 superfamily member OS=Spinacia oleracea OX=3562 GN=SOVF_033460 PE=3 SV=1
TRINITY_DN3884_c0_g1_i1	936	0	37.93	0	1.49	0	0.99	8.36021	tr|A0A0K9QTX5|A0A0K9QTX5_SPIOL Uncharacterized protein OS=Spinacia oleracea OX=3562 GN=SOVF_141700 PE=4 SV=1
TRINITY_DN4228_c0_g3_i3	714	0	38.21	0	2.13	0	1.42	8.36021	tr|A0A0K9QBC0|A0A0K9QBC0_SPIOL Membrane-anchored ubiquitin-fold protein OS=Spinacia oleracea OX=3562 GN=SOVF_205510 PE=4 SV=1
TRINITY_DN5044_c0_g1_i11	456	0	37.5	0	4.07	0	2.71	8.36021	-
TRINITY_DN5231_c0_g1_i8	4633	0	38.35	0	0.25	0	0.17	8.36021	tr|A0A0K9QSX1|A0A0K9QSX1_SPIOL Uncharacterized protein OS=Spinacia oleracea OX=3562 GN=SOVF_152150 PE=4 SV=1
TRINITY_DN5446_c0_g1_i2	770	0	38.49	0	1.94	0	1.29	8.36021	tr|A0A0K9R8C2|A0A0K9R8C2_SPIOL Uncharacterized protein OS=Spinacia oleracea OX=3562 GN=SOVF_094890 PE=4 SV=1
TRINITY_DN6188_c0_g1_i13	3590	0	37.97	0	0.33	0	0.22	8.36021	tr|A0A0K9QXS9|A0A0K9QXS9_SPIOL Uncharacterized protein OS=Spinacia oleracea OX=3562 GN=SOVF_136250 PE=4 SV=1
TRINITY_DN6386_c0_g1_i7	1735	0	37.77	0	0.72	0	0.48	8.36021	tr|A0A0K9RRM1|A0A0K9RRM1_SPIOL Uncharacterized protein OS=Spinacia oleracea OX=3562 GN=SOVF_036430 PE=4 SV=1
TRINITY_DN6830_c0_g1_i1	616	0	38	0	2.6	0	1.73	8.36021	-
TRINITY_DN6942_c0_g1_i3	455	0	38.08	0	4.15	0	2.76	8.36021	-
TRINITY_DN6945_c0_g1_i6	704	0	37.71	0	2.14	0	1.43	8.36021	-
TRINITY_DN744_c0_g1_i19	4426	0.3	37.68	0	0.26	0	0.17	8.36021	tr|A0A0K9QZE6|A0A0K9QZE6_SPIOL Uncharacterized protein OS=Spinacia oleracea OX=3562 GN=SOVF_129140 PE=3 SV=1
TRINITY_DN8349_c0_g1_i6	372	0	37.93	0	5.93	0	3.95	8.36021	-
TRINITY_DN8493_c0_g1_i5	2476	0	38.37	0	0.49	0	0.33	8.36021	tr|A0A0K9QFP4|A0A0K9QFP4_SPIOL Uncharacterized protein (Fragment) OS=Spinacia oleracea OX=3562 GN=SOVF_184330 PE=4 SV=1
TRINITY_DN1104_c0_g1_i6	857	0	36.57	0	1.61	0	1.07	8.32185	tr|A0A0K9QF69|A0A0K9QF69_SPIOL Peptidylprolyl isomerase OS=Spinacia oleracea OX=3562 GN=SOVF_192750 PE=4 SV=1
TRINITY_DN1150_c0_g1_i4	1349	0	36.52	0	0.93	0	0.62	8.32185	tr|A0A0K9RUD4|A0A0K9RUD4_SPIOL Uncharacterized protein OS=Spinacia oleracea OX=3562 GN=SOVF_027700 PE=3 SV=1
TRINITY_DN1394_c0_g1_i3	1268	0	37.47	0	1.02	0	0.68	8.32185	tr|A0A0K9Q9V9|A0A0K9Q9V9_SPIOL Expansin OS=Spinacia oleracea OX=3562 GN=SOVF_203090 PE=3 SV=1
TRINITY_DN1561_c0_g1_i3	3193	0	37.43	0	0.37	0	0.24	8.32185	tr|A0A0K9RMU0|A0A0K9RMU0_SPIOL Uncharacterized protein OS=Spinacia oleracea OX=3562 GN=SOVF_054440 PE=4 SV=1
TRINITY_DN16924_c0_g2_i4	464	0	36.89	0	3.89	0	2.59	8.32185	-
TRINITY_DN1714_c0_g1_i7	3284	0	36.89	0	0.35	0	0.23	8.32185	tr|A0A0K9R5Q0|A0A0K9R5Q0_SPIOL Uncharacterized protein OS=Spinacia oleracea OX=3562 GN=SOVF_110590 PE=4 SV=1
TRINITY_DN1822_c0_g1_i3	3277	0.42	37.37	0	0.36	0	0.24	8.32185	tr|A0A0K9RLM3|A0A0K9RLM3_SPIOL Uncharacterized protein OS=Spinacia oleracea OX=3562 GN=SOVF_052410 PE=3 SV=1
TRINITY_DN1929_c0_g1_i3	1840	0	36.56	0	0.65	0	0.43	8.32185	tr|A0A0J8BDK4|A0A0J8BDK4_BETVU Protein farnesyltransferase subunit beta OS=Beta vulgaris subsp. vulgaris OX=3555 GN=BVRB_2g045540 PE=3 SV=1
TRINITY_DN20200_c0_g1_i1	2196	0	36.52	0	0.54	0	0.36	8.32185	tr|A0A0K9RHI1|A0A0K9RHI1_SPIOL Uncharacterized protein OS=Spinacia oleracea OX=3562 GN=SOVF_066180 PE=4 SV=1
TRINITY_DN2136_c0_g1_i2	1985	0	36.7	0	0.6	0	0.4	8.32185	tr|A0A0K9QYM4|A0A0K9QYM4_SPIOL Uncharacterized protein OS=Spinacia oleracea OX=3562 GN=SOVF_133410 PE=4 SV=1
TRINITY_DN2222_c0_g1_i3	1074	0	37.05	0	1.23	0	0.82	8.32185	-
TRINITY_DN22387_c0_g1_i9	1703	0	37.17	0	0.72	0	0.48	8.32185	tr|A0A0K9QBD7|A0A0K9QBD7_SPIOL Uncharacterized protein OS=Spinacia oleracea OX=3562 GN=SOVF_198400 PE=4 SV=1
TRINITY_DN22575_c0_g1_i11	1446	0	36.94	0	0.87	0	0.58	8.32185	tr|A0A0J8B984|A0A0J8B984_BETVU Uncharacterized protein OS=Beta vulgaris subsp. vulgaris OX=3555 GN=BVRB_8g202040 PE=4 SV=1
TRINITY_DN2286_c0_g2_i2	3803	0	36.6	0	0.3	0	0.2	8.32185	tr|A0A0K9R1C7|A0A0K9R1C7_SPIOL Uncharacterized protein OS=Spinacia oleracea OX=3562 GN=SOVF_115900 PE=3 SV=1
TRINITY_DN2566_c0_g1_i4	664	0	37.23	0	2.29	0	1.53	8.32185	-
TRINITY_DN2574_c1_g2_i7	2629	0.02	37.4	0	0.45	0	0.3	8.32185	tr|A0A0J8D1W9|A0A0J8D1W9_BETVU Uncharacterized protein OS=Beta vulgaris subsp. vulgaris OX=3555 GN=BVRB_2g031870 PE=4 SV=1
TRINITY_DN3020_c0_g1_i9	3710	0	36.85	0	0.31	0	0.21	8.32185	tr|A0A0K9RBX9|A0A0K9RBX9_SPIOL Uncharacterized protein OS=Spinacia oleracea OX=3562 GN=SOVF_088380 PE=4 SV=1
TRINITY_DN3059_c0_g1_i3	2091	0	36.66	0	0.57	0	0.38	8.32185	tr|A0A0J8E0C7|A0A0J8E0C7_BETVU Uncharacterized protein OS=Beta vulgaris subsp. vulgaris OX=3555 GN=BVRB_8g202090 PE=4 SV=1
TRINITY_DN3320_c0_g1_i3	1614	0	36.77	0	0.76	0	0.51	8.32185	tr|A0A0K9R1M6|A0A0K9R1M6_SPIOL Uncharacterized protein OS=Spinacia oleracea OX=3562 GN=SOVF_117150 PE=4 SV=1
TRINITY_DN4268_c0_g1_i3	1028	0	36.92	0	1.29	0	0.86	8.32185	tr|A0A0K9QXX5|A0A0K9QXX5_SPIOL Uncharacterized protein OS=Spinacia oleracea OX=3562 GN=SOVF_128980 PE=4 SV=1
TRINITY_DN4863_c0_g1_i2	1106	0	37.05	0	1.19	0	0.79	8.32185	tr|A0A0K9RV61|A0A0K9RV61_SPIOL Protein VACUOLELESS1 OS=Spinacia oleracea OX=3562 GN=SOVF_025500 PE=3 SV=1
TRINITY_DN495_c0_g1_i12	4820	0	36.85	0	0.24	0	0.16	8.32185	tr|A0A0K9QRY5|A0A0K9QRY5_SPIOL Uncharacterized protein OS=Spinacia oleracea OX=3562 GN=SOVF_153470 PE=4 SV=1
TRINITY_DN5965_c0_g1_i9	1453	0	37.23	0	0.87	0	0.58	8.32185	tr|A0A0K9R5U9|A0A0K9R5U9_SPIOL Uncharacterized protein OS=Spinacia oleracea OX=3562 GN=SOVF_102900 PE=4 SV=1
TRINITY_DN7142_c0_g1_i2	327	0	37	0	7.53	0	5.01	8.32185	-
TRINITY_DN7349_c0_g1_i1	429	0	37	0	4.46	0	2.97	8.32185	-
TRINITY_DN8760_c0_g1_i1	314	0	37	0	8.23	0	5.47	8.32185	tr|A0A0K9QVA1|A0A0K9QVA1_SPIOL Uncharacterized protein (Fragment) OS=Spinacia oleracea OX=3562 GN=SOVF_137540 PE=4 SV=1
TRINITY_DN9294_c0_g1_i2	2806	0	37.36	0	0.42	0	0.28	8.32185	tr|A0A0K9QR03|A0A0K9QR03_SPIOL Uncharacterized protein OS=Spinacia oleracea OX=3562 GN=SOVF_151730 PE=4 SV=1
TRINITY_DN10540_c0_g1_i1	1515	0	35.63	0	0.79	0	0.53	8.28245	tr|A0A0K9QYT0|A0A0K9QYT0_SPIOL Uncharacterized protein OS=Spinacia oleracea OX=3562 GN=SOVF_131210 PE=4 SV=1
TRINITY_DN1251_c0_g1_i9	3508	0	36.25	0	0.32	0	0.21	8.28245	tr|A0A0K9RJ88|A0A0K9RJ88_SPIOL Uncharacterized protein OS=Spinacia oleracea OX=3562 GN=SOVF_060290 PE=4 SV=1
TRINITY_DN12649_c0_g1_i6	4019	0	36.01	0	0.28	0	0.18	8.28245	tr|A0A0K9R1B8|A0A0K9R1B8_SPIOL Uncharacterized protein OS=Spinacia oleracea OX=3562 GN=SOVF_117870 PE=4 SV=1
TRINITY_DN14624_c0_g2_i6	521	0	36.15	0	3.17	0	2.11	8.28245	-
TRINITY_DN2724_c1_g2_i2	2046	0	36.01	0	0.57	0	0.38	8.28245	tr|A0A0K9QV63|A0A0K9QV63_SPIOL Uncharacterized protein OS=Spinacia oleracea OX=3562 GN=SOVF_137620 PE=4 SV=1
TRINITY_DN279_c1_g1_i19	3241	0	35.73	0	0.35	0	0.23	8.28245	tr|A0A0K9RZZ0|A0A0K9RZZ0_SPIOL Uncharacterized protein OS=Spinacia oleracea OX=3562 GN=SOVF_009900 PE=3 SV=1
TRINITY_DN3144_c0_g1_i22	1535	0	36.2	0	0.79	0	0.53	8.28245	tr|A0A0K9QUI7|A0A0K9QUI7_SPIOL Uncharacterized protein OS=Spinacia oleracea OX=3562 GN=SOVF_147100 PE=4 SV=1
TRINITY_DN3868_c1_g1_i5	2783	0	36.25	0	0.41	0	0.27	8.28245	tr|A0A0K9RVU7|A0A0K9RVU7_SPIOL Uncharacterized protein OS=Spinacia oleracea OX=3562 GN=SOVF_023010 PE=4 SV=1
TRINITY_DN4501_c0_g1_i1	2844	0	36.4	0	0.4	0	0.27	8.28245	tr|A0A0K9R0J0|A0A0K9R0J0_SPIOL Uncharacterized protein OS=Spinacia oleracea OX=3562 GN=SOVF_125790 PE=4 SV=1
TRINITY_DN5261_c0_g1_i2	1873	0	36.21	0	0.63	0	0.42	8.28245	tr|A0A0K9S1G8|A0A0K9S1G8_SPIOL Uncharacterized protein OS=Spinacia oleracea OX=3562 GN=SOVF_005580 PE=4 SV=1
TRINITY_DN551_c0_g1_i2	1421	0.24	36.38	0.01	0.87	0	0.58	8.28245	tr|A0A0K9QZ09|A0A0K9QZ09_SPIOL Uncharacterized protein OS=Spinacia oleracea OX=3562 GN=SOVF_130550 PE=4 SV=1
TRINITY_DN569_c0_g1_i19	4194	0	36.09	0	0.27	0	0.18	8.28245	tr|A0A0K9RKN5|A0A0K9RKN5_SPIOL Uncharacterized protein OS=Spinacia oleracea OX=3562 GN=SOVF_055650 PE=4 SV=1
TRINITY_DN5797_c0_g1_i16	1828	0.02	36.46	0	0.66	0	0.44	8.28245	tr|A0A0K9QWW4|A0A0K9QWW4_SPIOL Uncharacterized protein (Fragment) OS=Spinacia oleracea OX=3562 GN=SOVF_132090 PE=4 SV=1
TRINITY_DN6245_c0_g1_i2	2801	0	35.53	0	0.4	0	0.27	8.28245	tr|A0A0K9R0R3|A0A0K9R0R3_SPIOL Uncharacterized protein OS=Spinacia oleracea OX=3562 GN=SOVF_126260 PE=4 SV=1
TRINITY_DN725_c0_g1_i5	1904	0	35.72	0	0.61	0	0.41	8.28245	tr|A0A0K9QKV5|A0A0K9QKV5_SPIOL Uncharacterized protein OS=Spinacia oleracea OX=3562 GN=SOVF_174090 PE=4 SV=1
TRINITY_DN7603_c0_g1_i1	1631	0	36.13	0	0.74	0	0.49	8.28245	tr|A0A0K9RHF2|A0A0K9RHF2_SPIOL COBRA-like protein OS=Spinacia oleracea OX=3562 GN=SOVF_066190 PE=3 SV=1
TRINITY_DN800_c0_g1_i6	2307	0	36.26	0	0.5	0	0.34	8.28245	tr|A0A0K9RS85|A0A0K9RS85_SPIOL Uncharacterized protein OS=Spinacia oleracea OX=3562 GN=SOVF_034290 PE=4 SV=1
TRINITY_DN9937_c0_g1_i1	544	0	35.85	0	2.94	0	1.96	8.28245	tr|A0A0K9Q7Q5|A0A0K9Q7Q5_SPIOL Uncharacterized protein (Fragment) OS=Spinacia oleracea OX=3562 GN=SOVF_210670 PE=4 SV=1
TRINITY_DN10135_c0_g1_i14	2722	0.02	35.13	0	0.41	0	0.27	8.24194	tr|A0A0K9RZM9|A0A0K9RZM9_SPIOL Uncharacterized protein OS=Spinacia oleracea OX=3562 GN=SOVF_010930 PE=4 SV=1
TRINITY_DN1030_c1_g2_i2	2234	0	34.52	0	0.5	0	0.33	8.24194	tr|A0A0K9QNX6|A0A0K9QNX6_SPIOL Uncharacterized protein OS=Spinacia oleracea OX=3562 GN=SOVF_157910 PE=4 SV=1
TRINITY_DN10483_c2_g1_i1	1236	0	35.38	0	0.99	0	0.66	8.24194	-
TRINITY_DN11386_c0_g1_i7	1610	0	34.74	0	0.72	0	0.48	8.24194	tr|A0A0J8BBP1|A0A0J8BBP1_BETVU Uncharacterized protein OS=Beta vulgaris subsp. vulgaris OX=3555 GN=BVRB_5g126950 PE=4 SV=1
TRINITY_DN1157_c1_g1_i13	1851	0.06	34.52	0	0.61	0	0.41	8.24194	tr|A0A0K9RI90|A0A0K9RI90_SPIOL Uncharacterized protein OS=Spinacia oleracea OX=3562 GN=SOVF_069020 PE=4 SV=1
TRINITY_DN1173_c1_g1_i6	2060	0	34.86	0	0.55	0	0.37	8.24194	tr|A0A0K9RI80|A0A0K9RI80_SPIOL Uncharacterized protein OS=Spinacia oleracea OX=3562 GN=SOVF_063820 PE=3 SV=1
TRINITY_DN1326_c0_g1_i27	4176	0.01	34.89	0	0.26	0	0.17	8.24194	tr|A0A0K9RQU7|A0A0K9RQU7_SPIOL Uncharacterized protein OS=Spinacia oleracea OX=3562 GN=SOVF_038980 PE=4 SV=1
TRINITY_DN13400_c0_g1_i1	2589	0	34.57	0	0.43	0	0.28	8.24194	-
TRINITY_DN17013_c0_g1_i2	797	0	34.59	0	1.67	0	1.11	8.24194	-
TRINITY_DN17988_c0_g1_i1	1607	0	34.82	0	0.72	0	0.48	8.24194	tr|A0A0K9RR80|A0A0K9RR80_SPIOL Uncharacterized protein OS=Spinacia oleracea OX=3562 GN=SOVF_043140 PE=4 SV=1
TRINITY_DN227_c0_g1_i1	4427	0	35.25	0	0.25	0	0.16	8.24194	tr|A0A0K9RCS0|A0A0K9RCS0_SPIOL Uncharacterized protein OS=Spinacia oleracea OX=3562 GN=SOVF_081140 PE=4 SV=1
TRINITY_DN2302_c0_g3_i13	2857	0	34.94	0	0.39	0	0.26	8.24194	tr|A0A0K9RGG8|A0A0K9RGG8_SPIOL Uncharacterized protein OS=Spinacia oleracea OX=3562 GN=SOVF_069210 PE=4 SV=1
TRINITY_DN2545_c0_g1_i2	3198	0	35.31	0	0.35	0	0.23	8.24194	tr|A0A0K9RNM7|A0A0K9RNM7_SPIOL Non-specific lipid-transfer protein OS=Spinacia oleracea OX=3562 GN=SOVF_052140 PE=3 SV=1
TRINITY_DN2908_c0_g1_i4	2273	0	34.99	0	0.5	0	0.33	8.24194	tr|A0A0K9RE24|A0A0K9RE24_SPIOL Uncharacterized protein OS=Spinacia oleracea OX=3562 GN=SOVF_076100 PE=4 SV=1
TRINITY_DN3249_c0_g1_i6	1447	0	34.9	0	0.82	0	0.54	8.24194	tr|A0A0K9QGE2|A0A0K9QGE2_SPIOL Uncharacterized protein OS=Spinacia oleracea OX=3562 GN=SOVF_188650 PE=4 SV=1
TRINITY_DN3293_c0_g1_i2	3388	0	35.24	0	0.33	0	0.22	8.24194	tr|A0A0K9S259|A0A0K9S259_SPIOL Uncharacterized protein OS=Spinacia oleracea OX=3562 GN=SOVF_008590 PE=3 SV=1
TRINITY_DN3583_c0_g1_i3	341	0	35	0	6.52	0	4.34	8.24194	-
TRINITY_DN3889_c0_g1_i1	310	0	35	0	8.01	0	5.33	8.24194	-
TRINITY_DN3963_c0_g1_i6	2326	0.49	35.05	0.01	0.48	0	0.32	8.24194	tr|A0A0K9Q9I0|A0A0K9Q9I0_SPIOL Uncharacterized protein OS=Spinacia oleracea OX=3562 GN=SOVF_204330 PE=4 SV=1
TRINITY_DN4013_c0_g1_i4	2567	0	35.07	0	0.44	0	0.29	8.24194	tr|A0A0K9RSX8|A0A0K9RSX8_SPIOL Uncharacterized protein OS=Spinacia oleracea OX=3562 GN=SOVF_038660 PE=4 SV=1
TRINITY_DN4406_c1_g1_i7	2036	0	35.42	0	0.57	0	0.38	8.24194	tr|A0A0K9R5B2|A0A0K9R5B2_SPIOL Uncharacterized protein OS=Spinacia oleracea OX=3562 GN=SOVF_104450 PE=4 SV=1
TRINITY_DN6386_c0_g1_i9	1863	0	35.09	0	0.62	0	0.41	8.24194	tr|A0A0K9RRM1|A0A0K9RRM1_SPIOL Uncharacterized protein OS=Spinacia oleracea OX=3562 GN=SOVF_036430 PE=4 SV=1
TRINITY_DN7363_c0_g1_i2	1985	0	34.93	0	0.57	0	0.38	8.24194	tr|A0A0K9R4G3|A0A0K9R4G3_SPIOL Uncharacterized protein OS=Spinacia oleracea OX=3562 GN=SOVF_107830 PE=3 SV=1
TRINITY_DN7416_c0_g2_i2	799	0	35.11	0	1.69	0	1.12	8.24194	-
TRINITY_DN7699_c0_g2_i6	1150	0	34.68	0	1.06	0	0.71	8.24194	tr|A0A0K9QQP4|A0A0K9QQP4_SPIOL Uncharacterized protein OS=Spinacia oleracea OX=3562 GN=SOVF_151940 PE=4 SV=1
TRINITY_DN8429_c0_g1_i2	1826	0	35.22	0	0.63	0	0.42	8.24194	tr|A0A0K9RXX2|A0A0K9RXX2_SPIOL Uncharacterized protein OS=Spinacia oleracea OX=3562 GN=SOVF_016680 PE=4 SV=1
TRINITY_DN861_c0_g1_i2	1808	0	34.88	0	0.64	0	0.42	8.24194	tr|A0A0K9S0R4|A0A0K9S0R4_SPIOL Uncharacterized protein OS=Spinacia oleracea OX=3562 GN=SOVF_012820 PE=4 SV=1
TRINITY_DN9942_c0_g1_i7	2132	0	35.47	0	0.54	0	0.36	8.24194	tr|A0A0K9S2L6|A0A0K9S2L6_SPIOL Uncharacterized protein OS=Spinacia oleracea OX=3562 GN=SOVF_000890 PE=3 SV=1
TRINITY_DN699_c0_g4_i1	324	1.13	295.96	0.23	61.42	0.16	40.87	8.23684	-
TRINITY_DN11369_c0_g3_i1	1662	12.21	3096.7	0.24	61.95	0.16	41.22	8.20398	tr|A0A0K9R217|A0A0K9R217_SPIOL Uncharacterized protein OS=Spinacia oleracea OX=3562 GN=SOVF_115520 PE=4 SV=1
TRINITY_DN10281_c0_g1_i3	1089	0	34.26	0	1.12	0	0.74	8.20026	-
TRINITY_DN10923_c0_g1_i8	1128	0	33.91	0	1.06	0	0.71	8.20026	-
TRINITY_DN1284_c0_g1_i10	1652	0	33.9	0	0.68	0	0.45	8.20026	tr|A0A0K9RJS6|A0A0K9RJS6_SPIOL Uncharacterized protein (Fragment) OS=Spinacia oleracea OX=3562 GN=SOVF_058520 PE=4 SV=1
TRINITY_DN14646_c0_g1_i1	439	0	34	0	3.94	0	2.62	8.20026	-
TRINITY_DN15043_c0_g1_i1	1534	0	34	0	0.74	0	0.5	8.20026	tr|E7BQD5|E7BQD5_SILLA Gag-pol polyprotein OS=Silene latifolia OX=37657 PE=4 SV=1
TRINITY_DN15665_c1_g1_i1	1127	0	34	0	1.07	0	0.71	8.20026	-
TRINITY_DN16371_c0_g1_i4	2621	0	34.48	0	0.42	0	0.28	8.20026	tr|A0A0K9QQN4|A0A0K9QQN4_SPIOL Uncharacterized protein OS=Spinacia oleracea OX=3562 GN=SOVF_152450 PE=4 SV=1
TRINITY_DN1671_c1_g1_i1	326	0	34	0	6.96	0	4.63	8.20026	-
TRINITY_DN17840_c0_g2_i3	2322	0	34.17	0	0.47	0	0.31	8.20026	-
TRINITY_DN190_c0_g1_i7	4109	0	33.81	0	0.25	0	0.17	8.20026	tr|A0A0K9REJ8|A0A0K9REJ8_SPIOL Uncharacterized protein (Fragment) OS=Spinacia oleracea OX=3562 GN=SOVF_080420 PE=3 SV=1
TRINITY_DN19560_c0_g3_i4	693	0	33.76	0	1.96	0	1.3	8.20026	tr|A0A0K9QMP7|A0A0K9QMP7_SPIOL Succinate dehydrogenase [ubiquinone] iron-sulfur subunit, mitochondrial OS=Spinacia oleracea OX=3562 GN=SOVF_161890 PE=3 SV=1
TRINITY_DN2157_c0_g1_i9	1111	0	33.51	0	1.07	0	0.71	8.20026	tr|A0A0K9QDA3|A0A0K9QDA3_SPIOL Uncharacterized protein OS=Spinacia oleracea OX=3562 GN=SOVF_192310 PE=4 SV=1
TRINITY_DN2286_c0_g2_i6	3786	0	34.04	0	0.28	0	0.19	8.20026	tr|A0A0K9R1C7|A0A0K9R1C7_SPIOL Uncharacterized protein OS=Spinacia oleracea OX=3562 GN=SOVF_115900 PE=3 SV=1
TRINITY_DN2306_c0_g1_i7	1269	0	34.23	0	0.93	0	0.62	8.20026	tr|A0A0K9R2D9|A0A0K9R2D9_SPIOL Uncharacterized protein OS=Spinacia oleracea OX=3562 GN=SOVF_114570 PE=3 SV=1
TRINITY_DN2638_c0_g1_i5	3131	0.42	33.53	0	0.34	0	0.22	8.20026	tr|A0A0K9QYN4|A0A0K9QYN4_SPIOL Uncharacterized protein OS=Spinacia oleracea OX=3562 GN=SOVF_125920 PE=3 SV=1
TRINITY_DN3908_c0_g1_i6	1102	0	33.6	0	1.08	0	0.72	8.20026	tr|A0A0K9RI53|A0A0K9RI53_SPIOL Uncharacterized protein OS=Spinacia oleracea OX=3562 GN=SOVF_063680 PE=4 SV=1
TRINITY_DN454_c0_g1_i4	2021	0	34.02	0	0.55	0	0.36	8.20026	tr|Q9XF75|Q9XF75_MESCR Water channel protein MipI OS=Mesembryanthemum crystallinum OX=3544 GN=MipI PE=2 SV=1
TRINITY_DN4613_c2_g1_i2	622	0	33.75	0	2.28	0	1.52	8.20026	-
TRINITY_DN4708_c0_g1_i12	1352	0	34.05	0	0.86	0	0.57	8.20026	tr|A0A0K9RXI1|A0A0K9RXI1_SPIOL Uncharacterized protein OS=Spinacia oleracea OX=3562 GN=SOVF_018520 PE=4 SV=1
TRINITY_DN515_c0_g1_i13	2494	0	34.18	0	0.44	0	0.29	8.20026	tr|A0A0K9QH90|A0A0K9QH90_SPIOL Uncharacterized protein OS=Spinacia oleracea OX=3562 GN=SOVF_185340 PE=4 SV=1
TRINITY_DN5698_c0_g1_i9	884	0	33.58	0	1.42	0	0.94	8.20026	tr|A0A0J7YML5|A0A0J7YML5_BETVU Uncharacterized protein (Fragment) OS=Beta vulgaris subsp. vulgaris OX=3555 GN=BVRB_042090 PE=4 SV=1
TRINITY_DN5764_c0_g1_i6	1891	0.08	34.5	0	0.6	0	0.4	8.20026	tr|A0A0K9RDP8|A0A0K9RDP8_SPIOL Uncharacterized protein OS=Spinacia oleracea OX=3562 GN=SOVF_084440 PE=4 SV=1
TRINITY_DN6336_c0_g1_i1	870	0	33.8	0	1.46	0	0.97	8.20026	tr|A0A0K9R0M0|A0A0K9R0M0_SPIOL Uncharacterized protein OS=Spinacia oleracea OX=3562 GN=SOVF_126450 PE=4 SV=1
TRINITY_DN6633_c0_g1_i13	3012	0.03	34.1	0	0.36	0	0.24	8.20026	tr|A0A0K9QHD8|A0A0K9QHD8_SPIOL Uncharacterized protein OS=Spinacia oleracea OX=3562 GN=SOVF_179150 PE=4 SV=1
TRINITY_DN7275_c0_g2_i4	4144	0	34.37	0	0.26	0	0.17	8.20026	tr|A0A0K9QIP4|A0A0K9QIP4_SPIOL Uncharacterized protein OS=Spinacia oleracea OX=3562 GN=SOVF_180790 PE=3 SV=1
TRINITY_DN7674_c0_g1_i15	1852	0	33.7	0	0.6	0	0.4	8.20026	tr|A0A0K9RIL4|A0A0K9RIL4_SPIOL Uncharacterized protein (Fragment) OS=Spinacia oleracea OX=3562 GN=SOVF_067710 PE=3 SV=1
TRINITY_DN7965_c0_g1_i4	5290	0	34.24	0	0.2	0	0.13	8.20026	tr|A0A0K9R8V5|A0A0K9R8V5_SPIOL Uncharacterized protein OS=Spinacia oleracea OX=3562 GN=SOVF_093830 PE=4 SV=1
TRINITY_DN800_c0_g1_i7	2399	0	33.51	0	0.45	0	0.3	8.20026	tr|A0A0K9RS85|A0A0K9RS85_SPIOL Uncharacterized protein OS=Spinacia oleracea OX=3562 GN=SOVF_034290 PE=4 SV=1
TRINITY_DN8246_c0_g1_i12	1762	0	34.09	0	0.64	0	0.43	8.20026	-
TRINITY_DN8343_c0_g1_i9	1688	0.03	34.5	0	0.68	0	0.45	8.20026	tr|A0A0K9QA74|A0A0K9QA74_SPIOL Uncharacterized protein OS=Spinacia oleracea OX=3562 GN=SOVF_202330 PE=4 SV=1
TRINITY_DN9387_c1_g4_i1	686	0	34.34	0	2.02	0	1.35	8.20026	tr|A0A0K9RL08|A0A0K9RL08_SPIOL Uncharacterized protein OS=Spinacia oleracea OX=3562 GN=SOVF_054960 PE=3 SV=1
TRINITY_DN2721_c0_g2_i2	1879	0.63	281.34	0.01	4.91	0.01	3.27	8.16185	tr|A0A0K9R153|A0A0K9R153_SPIOL Uncharacterized protein OS=Spinacia oleracea OX=3562 GN=SOVF_118590 PE=4 SV=1
TRINITY_DN1016_c1_g1_i25	1969	0	32.86	0	0.54	0	0.36	8.15734	tr|A0A0K9QQ08|A0A0K9QQ08_SPIOL Uncharacterized protein OS=Spinacia oleracea OX=3562 GN=SOVF_154340 PE=4 SV=1
TRINITY_DN10651_c1_g1_i1	805	0	32.54	0	1.55	0	1.03	8.15734	-
TRINITY_DN11038_c0_g2_i5	2271	0	33.28	0	0.47	0	0.31	8.15734	tr|A0A0K9QSD2|A0A0K9QSD2_SPIOL Uncharacterized protein OS=Spinacia oleracea OX=3562 GN=SOVF_153530 PE=3 SV=1
TRINITY_DN1167_c0_g1_i12	1081	0	32.66	0	1.08	0	0.72	8.15734	-
TRINITY_DN13284_c0_g3_i1	622	0	32.61	0	2.2	0	1.46	8.15734	-
TRINITY_DN13607_c0_g1_i2	1558	0	33.09	0	0.71	0	0.47	8.15734	tr|A0A0K9RZ21|A0A0K9RZ21_SPIOL Uncharacterized protein OS=Spinacia oleracea OX=3562 GN=SOVF_012980 PE=4 SV=1
TRINITY_DN1407_c0_g1_i22	5686	0.01	32.59	0	0.18	0	0.12	8.15734	tr|A0A0K9R6N9|A0A0K9R6N9_SPIOL Uncharacterized protein OS=Spinacia oleracea OX=3562 GN=SOVF_106030 PE=4 SV=1
TRINITY_DN15226_c0_g1_i7	277	0	32.66	0	9.79	0	6.51	8.15734	-
TRINITY_DN1554_c1_g1_i1	921	0	33.27	0	1.34	0	0.89	8.15734	-
TRINITY_DN16871_c0_g1_i4	895	0	32.65	0	1.36	0	0.9	8.15734	tr|A0A0K9R5U3|A0A0K9R5U3_SPIOL Uncharacterized protein OS=Spinacia oleracea OX=3562 GN=SOVF_110060 PE=4 SV=1
TRINITY_DN1762_c0_g1_i4	2700	0	33.25	0	0.39	0	0.26	8.15734	tr|A0A0K9RQD2|A0A0K9RQD2_SPIOL Auxin efflux carrier component OS=Spinacia oleracea OX=3562 GN=SOVF_040160 PE=3 SV=1
TRINITY_DN17772_c0_g1_i3	1349	0	33.39	0	0.85	0	0.56	8.15734	tr|A0A0K9QVS1|A0A0K9QVS1_SPIOL Hexosyltransferase OS=Spinacia oleracea OX=3562 GN=SOVF_135810 PE=3 SV=1
TRINITY_DN1926_c1_g1_i1	2278	0	32.7	0	0.46	0	0.31	8.15734	tr|A0A0K9RA57|A0A0K9RA57_SPIOL Uncharacterized protein OS=Spinacia oleracea OX=3562 GN=SOVF_096580 PE=4 SV=1
TRINITY_DN2627_c0_g1_i1	3268	0	32.78	0	0.31	0	0.21	8.15734	tr|A0A0K9RX25|A0A0K9RX25_SPIOL Uncharacterized protein OS=Spinacia oleracea OX=3562 GN=SOVF_019210 PE=4 SV=1
TRINITY_DN2701_c0_g1_i21	3608	0	33.37	0	0.29	0	0.19	8.15734	tr|A0A0K9QQZ1|A0A0K9QQZ1_SPIOL Uncharacterized protein OS=Spinacia oleracea OX=3562 GN=SOVF_156490 PE=4 SV=1
TRINITY_DN28062_c0_g1_i2	652	0	33	0	2.09	0	1.39	8.15734	tr|A0A0K9REX8|A0A0K9REX8_SPIOL Uncharacterized protein OS=Spinacia oleracea OX=3562 GN=SOVF_074460 PE=4 SV=1
TRINITY_DN2894_c0_g1_i14	1931	0	32.8	0	0.56	0	0.37	8.15734	-
TRINITY_DN3906_c0_g1_i3	1660	0	33.35	0	0.67	0	0.44	8.15734	tr|A0A0K9S271|A0A0K9S271_SPIOL Uncharacterized protein OS=Spinacia oleracea OX=3562 GN=SOVF_007920 PE=4 SV=1
TRINITY_DN4108_c0_g1_i4	1350	0	33.37	0	0.85	0	0.56	8.15734	tr|A0A0J8E1K1|A0A0J8E1K1_BETVU Uncharacterized protein OS=Beta vulgaris subsp. vulgaris OX=3555 GN=BVRB_7g179920 PE=4 SV=1
TRINITY_DN4337_c0_g1_i4	3723	0	32.98	0	0.28	0	0.18	8.15734	tr|A0A0K9R6D0|A0A0K9R6D0_SPIOL Uncharacterized protein OS=Spinacia oleracea OX=3562 GN=SOVF_101340 PE=4 SV=1
TRINITY_DN52663_c0_g1_i1	654	0	33	0	2.08	0	1.38	8.15734	-
TRINITY_DN5721_c0_g2_i1	1419	0	32.88	0	0.79	0	0.52	8.15734	tr|A0A0K9RTD6|A0A0K9RTD6_SPIOL Uncharacterized protein OS=Spinacia oleracea OX=3562 GN=SOVF_036510 PE=4 SV=1
TRINITY_DN5806_c0_g2_i1	691	0	33	0	1.92	0	1.28	8.15734	-
TRINITY_DN5875_c0_g1_i6	2195	0	32.78	0	0.48	0	0.32	8.15734	tr|A0A0K9QPX6|A0A0K9QPX6_SPIOL Uncharacterized protein OS=Spinacia oleracea OX=3562 GN=SOVF_154670 PE=4 SV=1
TRINITY_DN5968_c0_g1_i3	1327	0	32.75	0	0.85	0	0.56	8.15734	tr|A0A0K9RWW1|A0A0K9RWW1_SPIOL Uncharacterized protein OS=Spinacia oleracea OX=3562 GN=SOVF_024980 PE=4 SV=1
TRINITY_DN7494_c0_g1_i8	3107	0	32.89	0	0.33	0	0.22	8.15734	tr|A0A0K9RR36|A0A0K9RR36_SPIOL Uncharacterized protein OS=Spinacia oleracea OX=3562 GN=SOVF_038110 PE=3 SV=1
TRINITY_DN8450_c0_g1_i8	2083	0.08	32.79	0	0.51	0	0.34	8.15734	tr|A0A0K9RRV9|A0A0K9RRV9_SPIOL Uncharacterized protein OS=Spinacia oleracea OX=3562 GN=SOVF_035240 PE=4 SV=1
TRINITY_DN847_c0_g1_i10	2531	0	33.07	0	0.42	0	0.28	8.15734	tr|A0A0J8B850|A0A0J8B850_BETVU Uncharacterized protein OS=Beta vulgaris subsp. vulgaris OX=3555 GN=BVRB_001970 PE=4 SV=1
TRINITY_DN9248_c0_g1_i3	1392	0.27	32.79	0.01	0.8	0	0.53	8.15734	tr|A0A0K9R3W8|A0A0K9R3W8_SPIOL Uncharacterized protein OS=Spinacia oleracea OX=3562 GN=SOVF_112630 PE=4 SV=1
TRINITY_DN9380_c0_g2_i6	352	0	33.05	0	5.77	0	3.84	8.15734	tr|A0A0K9QKG1|A0A0K9QKG1_SPIOL Uncharacterized protein OS=Spinacia oleracea OX=3562 GN=SOVF_168390 PE=4 SV=1
TRINITY_DN10100_c0_g3_i3	575	0	32.18	0	2.43	0	1.62	8.1131	-
TRINITY_DN10281_c0_g1_i1	570	0	32.42	0	2.48	0	1.65	8.1131	-
TRINITY_DN1284_c0_g1_i4	1740	0	31.85	0	0.61	0	0.4	8.1131	tr|A0A0K9RJS6|A0A0K9RJS6_SPIOL Uncharacterized protein (Fragment) OS=Spinacia oleracea OX=3562 GN=SOVF_058520 PE=4 SV=1
TRINITY_DN14109_c0_g1_i5	1440	0	32.16	0	0.76	0	0.5	8.1131	tr|A0A0J8BQF1|A0A0J8BQF1_BETVU Uncharacterized protein OS=Beta vulgaris subsp. vulgaris OX=3555 GN=BVRB_9g207040 PE=4 SV=1
TRINITY_DN15822_c0_g1_i4	2291	0	31.72	0	0.45	0	0.3	8.1131	-
TRINITY_DN16657_c0_g1_i10	2412	0	32.33	0	0.43	0	0.29	8.1131	tr|A0A0K9QCJ4|A0A0K9QCJ4_SPIOL S-acyltransferase (Fragment) OS=Spinacia oleracea OX=3562 GN=SOVF_201490 PE=3 SV=1
TRINITY_DN21052_c0_g3_i5	3769	0	31.86	0	0.26	0	0.17	8.1131	-
TRINITY_DN2236_c0_g1_i4	2115	0	32.24	0	0.49	0	0.33	8.1131	tr|A0A0K9QKL4|A0A0K9QKL4_SPIOL Uncharacterized protein OS=Spinacia oleracea OX=3562 GN=SOVF_168510 PE=4 SV=1
TRINITY_DN2458_c0_g2_i10	1948	0	31.81	0	0.53	0	0.35	8.1131	tr|A8E124|A8E124_SPIOL NEP1-interacting protein OS=Spinacia oleracea OX=3562 GN=nip PE=2 SV=1
TRINITY_DN2842_c0_g1_i4	1901	0	31.55	0	0.54	0	0.36	8.1131	tr|A0A0J8CB59|A0A0J8CB59_BETVU Uncharacterized protein OS=Beta vulgaris subsp. vulgaris OX=3555 GN=BVRB_5g113530 PE=4 SV=1
TRINITY_DN2966_c0_g1_i15	1876	0	31.93	0	0.56	0	0.37	8.1131	tr|A0A0K9R2X0|A0A0K9R2X0_SPIOL Uncharacterized protein OS=Spinacia oleracea OX=3562 GN=SOVF_112820 PE=4 SV=1
TRINITY_DN30258_c0_g1_i1	1198	0	32	0	0.93	0	0.62	8.1131	tr|A0A0K9QPB6|A0A0K9QPB6_SPIOL Uncharacterized protein OS=Spinacia oleracea OX=3562 GN=SOVF_161660 PE=4 SV=1
TRINITY_DN3099_c0_g1_i9	1215	0	32.1	0	0.92	0	0.61	8.1131	tr|A0A249Y708|A0A249Y708_9CARY TATA-box-binding protein OS=Hylocereus polyrhizus OX=1195597 GN=TBP2 PE=2 SV=1
TRINITY_DN3146_c0_g1_i2	680	0	31.76	0	1.89	0	1.26	8.1131	tr|A0A1B1RVA8|A0A1B1RVA8_AMATR Transcription factor MYB1-variant OS=Amaranthus tricolor OX=29722 PE=2 SV=1
TRINITY_DN3456_c0_g1_i1	780	0	32	0	1.59	0	1.06	8.1131	tr|A0A0J8B9Y4|A0A0J8B9Y4_BETVU Uncharacterized protein OS=Beta vulgaris subsp. vulgaris OX=3555 GN=BVRB_5g124040 PE=4 SV=1
TRINITY_DN3884_c0_g1_i3	5676	0	32.17	0	0.17	0	0.12	8.1131	tr|A0A0K9QTX5|A0A0K9QTX5_SPIOL Uncharacterized protein OS=Spinacia oleracea OX=3562 GN=SOVF_141700 PE=4 SV=1
TRINITY_DN392_c0_g1_i1	720	0	32.26	0	1.78	0	1.18	8.1131	-
TRINITY_DN3945_c0_g1_i4	1998	0	31.61	0	0.52	0	0.34	8.1131	tr|A0A0J8CKI9|A0A0J8CKI9_BETVU Uncharacterized protein OS=Beta vulgaris subsp. vulgaris OX=3555 GN=BVRB_4g076160 PE=4 SV=1
TRINITY_DN3995_c1_g1_i2	6714	0	31.93	0	0.14	0	0.1	8.1131	tr|A2I5F1|A2I5F1_BETVU Transposon-like protein OS=Beta vulgaris OX=161934 PE=4 SV=1
TRINITY_DN4349_c0_g1_i11	1291	0	31.52	0	0.84	0	0.56	8.1131	tr|A0A0K9QIV7|A0A0K9QIV7_SPIOL Uncharacterized protein OS=Spinacia oleracea OX=3562 GN=SOVF_174230 PE=4 SV=1
TRINITY_DN5483_c0_g1_i21	2229	0	31.92	0	0.46	0	0.31	8.1131	tr|G9FIF2|G9FIF2_BETVU Uncharacterized protein OS=Beta vulgaris OX=161934 PE=4 SV=1
TRINITY_DN5549_c0_g1_i7	2279	0	32.07	0	0.45	0	0.3	8.1131	tr|A0A0K9RS60|A0A0K9RS60_SPIOL Uncharacterized protein OS=Spinacia oleracea OX=3562 GN=SOVF_034400 PE=3 SV=1
TRINITY_DN6581_c0_g1_i1	3018	0	32.02	0	0.33	0	0.22	8.1131	tr|A0A0K9R3C1|A0A0K9R3C1_SPIOL Uncharacterized protein OS=Spinacia oleracea OX=3562 GN=SOVF_111370 PE=4 SV=1
TRINITY_DN7354_c0_g1_i23	1926	0	32.46	0	0.55	0	0.37	8.1131	tr|A0A0K9RC11|A0A0K9RC11_SPIOL Uncharacterized protein OS=Spinacia oleracea OX=3562 GN=SOVF_083770 PE=4 SV=1
TRINITY_DN8493_c0_g1_i20	2428	0	31.58	0	0.42	0	0.28	8.1131	tr|A0A0J8B8P6|A0A0J8B8P6_BETVU Uncharacterized protein OS=Beta vulgaris subsp. vulgaris OX=3555 GN=BVRB_6g155910 PE=4 SV=1
TRINITY_DN9338_c0_g1_i10	3437	0	32.48	0	0.3	0	0.2	8.1131	tr|A0A0K9R015|A0A0K9R015_SPIOL Uncharacterized protein (Fragment) OS=Spinacia oleracea OX=3562 GN=SOVF_122240 PE=4 SV=1
TRINITY_DN9338_c0_g1_i8	3121	0	31.97	0	0.32	0	0.21	8.1131	tr|A0A0K9R015|A0A0K9R015_SPIOL Uncharacterized protein (Fragment) OS=Spinacia oleracea OX=3562 GN=SOVF_122240 PE=4 SV=1
TRINITY_DN10397_c0_g1_i3	1242	0	30.78	0	0.86	0	0.57	8.06747	tr|A0A0K9QCT1|A0A0K9QCT1_SPIOL Uncharacterized protein OS=Spinacia oleracea OX=3562 GN=SOVF_200540 PE=4 SV=1
TRINITY_DN11408_c0_g1_i2	609	0	31	0	2.16	0	1.44	8.06747	-
TRINITY_DN12711_c0_g1_i9	493	0	31	0	2.97	0	1.97	8.06747	-
TRINITY_DN12761_c0_g2_i2	1293	0	30.79	0	0.82	0	0.55	8.06747	-
TRINITY_DN14036_c0_g1_i2	222	0	30.81	0	17.48	0	11.63	8.06747	-
TRINITY_DN1565_c0_g1_i4	1297	0	31.01	0	0.82	0	0.55	8.06747	tr|A0A0K9R465|A0A0K9R465_SPIOL Uncharacterized protein OS=Spinacia oleracea OX=3562 GN=SOVF_108700 PE=4 SV=1
TRINITY_DN1596_c0_g1_i2	2768	0	31.4	0	0.36	0	0.24	8.06747	tr|A0A0K9QUV6|A0A0K9QUV6_SPIOL Uncharacterized protein OS=Spinacia oleracea OX=3562 GN=SOVF_138550 PE=4 SV=1
TRINITY_DN1680_c0_g1_i1	1663	0	30.85	0	0.62	0	0.41	8.06747	tr|A0A0J8BBI1|A0A0J8BBI1_BETVU Uncharacterized protein OS=Beta vulgaris subsp. vulgaris OX=3555 GN=BVRB_6g156250 PE=4 SV=1
TRINITY_DN1716_c0_g2_i10	2108	0	31.01	0	0.48	0	0.32	8.06747	tr|A0A0K9R2S5|A0A0K9R2S5_SPIOL Uncharacterized protein OS=Spinacia oleracea OX=3562 GN=SOVF_113260 PE=4 SV=1
TRINITY_DN24555_c0_g1_i4	1811	0	31.23	0	0.57	0	0.38	8.06747	tr|A0A0K9RIJ0|A0A0K9RIJ0_SPIOL Uncharacterized protein OS=Spinacia oleracea OX=3562 GN=SOVF_062950 PE=3 SV=1
TRINITY_DN25924_c0_g1_i2	584	0	30.6	0	2.26	0	1.51	8.06747	-
TRINITY_DN4005_c0_g4_i2	1362	0	31.47	0	0.79	0	0.53	8.06747	-
TRINITY_DN4349_c0_g1_i12	1727	0	30.56	0	0.59	0	0.39	8.06747	tr|A0A0K9QIV7|A0A0K9QIV7_SPIOL Uncharacterized protein OS=Spinacia oleracea OX=3562 GN=SOVF_174230 PE=4 SV=1
TRINITY_DN5040_c0_g2_i8	2141	0.05	31.07	0	0.47	0	0.31	8.06747	-
TRINITY_DN5648_c0_g1_i2	1498	0	30.98	0	0.7	0	0.46	8.06747	tr|A0A0K9RRA4|A0A0K9RRA4_SPIOL Uncharacterized protein OS=Spinacia oleracea OX=3562 GN=SOVF_037420 PE=4 SV=1
TRINITY_DN5690_c0_g1_i11	2354	0	31.23	0	0.43	0	0.28	8.06747	tr|A0A0K9S1Z3|A0A0K9S1Z3_SPIOL Uncharacterized protein (Fragment) OS=Spinacia oleracea OX=3562 GN=SOVF_008510 PE=4 SV=1
TRINITY_DN7531_c0_g2_i3	2383	0	31.39	0	0.42	0	0.28	8.06747	tr|A0A0K9S3J1|A0A0K9S3J1_SPIOL Uncharacterized protein OS=Spinacia oleracea OX=3562 GN=SOVF_003540 PE=4 SV=1
TRINITY_DN7917_c0_g1_i4	419	0	31.01	0	3.9	0	2.59	8.06747	tr|A0A0K9RDQ0|A0A0K9RDQ0_SPIOL Eukaryotic translation initiation factor 3 subunit E OS=Spinacia oleracea OX=3562 GN=SOVF_083050 PE=3 SV=1
TRINITY_DN8532_c0_g1_i4	3305	0	31.2	0	0.3	0	0.2	8.06747	tr|A0A0K9RPZ6|A0A0K9RPZ6_SPIOL Uncharacterized protein OS=Spinacia oleracea OX=3562 GN=SOVF_047270 PE=4 SV=1
TRINITY_DN9974_c0_g1_i2	780	0	30.62	0	1.52	0	1.01	8.06747	tr|A0A0K9QGC3|A0A0K9QGC3_SPIOL Uncharacterized protein OS=Spinacia oleracea OX=3562 GN=SOVF_187770 PE=4 SV=1
TRINITY_DN10061_c0_g2_i3	760	0	30.14	0	1.55	0	1.03	8.02034	-
TRINITY_DN10100_c0_g1_i3	763	0	30.37	0	1.55	0	1.03	8.02034	-
TRINITY_DN10393_c0_g2_i1	1679	0	30.26	0	0.6	0	0.4	8.02034	tr|A0A0K9Q6T8|A0A0K9Q6T8_SPIOL Uncharacterized protein (Fragment) OS=Spinacia oleracea OX=3562 GN=SOVF_215280 PE=4 SV=1
TRINITY_DN11384_c0_g1_i2	4199	0	30.14	0	0.22	0	0.15	8.02034	tr|A0A0K9QC56|A0A0K9QC56_SPIOL Uncharacterized protein OS=Spinacia oleracea OX=3562 GN=SOVF_195700 PE=4 SV=1
TRINITY_DN11407_c0_g1_i14	3830	0	30.25	0	0.25	0	0.16	8.02034	tr|A0A0J8B6E7|A0A0J8B6E7_BETVU Uncharacterized protein OS=Beta vulgaris subsp. vulgaris OX=3555 GN=BVRB_007940 PE=4 SV=1
TRINITY_DN1216_c0_g2_i8	2917	0	29.76	0	0.32	0	0.21	8.02034	tr|A0A0J8CFS3|A0A0J8CFS3_BETVU Uncharacterized protein OS=Beta vulgaris subsp. vulgaris OX=3555 GN=BVRB_5g113610 PE=4 SV=1
TRINITY_DN12241_c0_g2_i1	984	0	30	0	1.11	0	0.74	8.02034	-
TRINITY_DN1259_c0_g1_i6	2005	0	30.12	0	0.49	0	0.33	8.02034	tr|A0A0K9RAJ5|A0A0K9RAJ5_SPIOL Uncharacterized protein OS=Spinacia oleracea OX=3562 GN=SOVF_088400 PE=4 SV=1
TRINITY_DN1589_c2_g1_i11	2628	0	29.94	0	0.36	0	0.24	8.02034	tr|A0A0K9QD28|A0A0K9QD28_SPIOL Uncharacterized protein (Fragment) OS=Spinacia oleracea OX=3562 GN=SOVF_192830 PE=4 SV=1
TRINITY_DN18927_c0_g1_i2	572	0	29.83	0	2.27	0	1.51	8.02034	-
TRINITY_DN20550_c0_g1_i10	2683	0	30.31	0	0.36	0	0.24	8.02034	tr|A0A0K9QKM3|A0A0K9QKM3_SPIOL Probable magnesium transporter OS=Spinacia oleracea OX=3562 GN=SOVF_173580 PE=3 SV=1
TRINITY_DN2062_c0_g1_i3	784	0	30.36	0	1.5	0	1	8.02034	-
TRINITY_DN21133_c0_g1_i1	1586	0	30	0	0.63	0	0.42	8.02034	tr|A0A0K9S225|A0A0K9S225_SPIOL rRNA adenine N(6)-methyltransferase OS=Spinacia oleracea OX=3562 GN=SOVF_003990 PE=3 SV=1
TRINITY_DN21522_c0_g1_i2	2004	0	30	0	0.49	0	0.32	8.02034	tr|Q1H8R8|Q1H8R8_OXYRB Putative coatomer protein, epsilon subunit (Fragment) OS=Oxybasis rubra OX=3560 GN=cope PE=2 SV=1
TRINITY_DN22670_c0_g1_i2	1128	0	30	0	0.94	0	0.63	8.02034	tr|A0A0K9QCR0|A0A0K9QCR0_SPIOL Uncharacterized protein OS=Spinacia oleracea OX=3562 GN=SOVF_193840 PE=4 SV=1
TRINITY_DN2381_c0_g1_i10	467	0	29.86	0	3.12	0	2.08	8.02034	-
TRINITY_DN3112_c0_g1_i1	2471	0.48	29.87	0.01	0.39	0	0.26	8.02034	-
TRINITY_DN4173_c0_g1_i19	3191	0	30.04	0	0.3	0	0.2	8.02034	tr|A0A0K9QD38|A0A0K9QD38_SPIOL Uncharacterized protein OS=Spinacia oleracea OX=3562 GN=SOVF_192640 PE=4 SV=1
TRINITY_DN4344_c0_g1_i4	2269	0	30.11	0	0.43	0	0.28	8.02034	tr|A0A0K9RIL9|A0A0K9RIL9_SPIOL Uncharacterized protein OS=Spinacia oleracea OX=3562 GN=SOVF_067760 PE=4 SV=1
TRINITY_DN4775_c0_g1_i4	1687	0	29.51	0	0.58	0	0.39	8.02034	tr|A0A0K9QEH3|A0A0K9QEH3_SPIOL Uncharacterized protein OS=Spinacia oleracea OX=3562 GN=SOVF_188250 PE=4 SV=1
TRINITY_DN4949_c0_g1_i8	1698	0	30.28	0	0.59	0	0.39	8.02034	tr|A0A0K9R0K8|A0A0K9R0K8_SPIOL Uncharacterized protein OS=Spinacia oleracea OX=3562 GN=SOVF_120290 PE=4 SV=1
TRINITY_DN5057_c0_g1_i4	1872	0	29.93	0	0.52	0	0.35	8.02034	tr|A0A0K9R125|A0A0K9R125_SPIOL Uncharacterized protein OS=Spinacia oleracea OX=3562 GN=SOVF_118790 PE=4 SV=1
TRINITY_DN5134_c0_g2_i2	1110	0	29.76	0	0.95	0	0.63	8.02034	tr|A0A0K9S2R4|A0A0K9S2R4_SPIOL Uncharacterized protein OS=Spinacia oleracea OX=3562 GN=SOVF_000990 PE=4 SV=1
TRINITY_DN5914_c0_g2_i4	456	0	30	0	3.26	0	2.17	8.02034	-
TRINITY_DN5965_c0_g1_i10	2733	0	30.37	0	0.35	0	0.23	8.02034	tr|A0A0K9R7D9|A0A0K9R7D9_SPIOL Uncharacterized protein OS=Spinacia oleracea OX=3562 GN=SOVF_102900 PE=4 SV=1
TRINITY_DN5977_c0_g1_i6	1509	0	29.57	0	0.66	0	0.44	8.02034	tr|A0A0K9R5V2|A0A0K9R5V2_SPIOL Uncharacterized protein OS=Spinacia oleracea OX=3562 GN=SOVF_103210 PE=4 SV=1
TRINITY_DN6168_c0_g1_i4	771	0	30.34	0	1.53	0	1.02	8.02034	-
TRINITY_DN812_c0_g1_i16	541	0	30.21	0	2.5	0	1.67	8.02034	tr|A0A0K9R180|A0A0K9R180_SPIOL Uncharacterized protein OS=Spinacia oleracea OX=3562 GN=SOVF_123760 PE=3 SV=1
TRINITY_DN8348_c1_g1_i2	2763	0.07	30.34	0	0.35	0	0.23	8.02034	tr|A0A0K9RE94|A0A0K9RE94_SPIOL Uncharacterized protein OS=Spinacia oleracea OX=3562 GN=SOVF_082780 PE=4 SV=1
TRINITY_DN8556_c0_g1_i1	1338	0	30.12	0	0.77	0	0.51	8.02034	tr|A0A0K9QSJ0|A0A0K9QSJ0_SPIOL Uncharacterized protein OS=Spinacia oleracea OX=3562 GN=SOVF_151690 PE=4 SV=1
TRINITY_DN9378_c0_g1_i7	931	0	29.8	0	1.18	0	0.78	8.02034	tr|A0A0K9R680|A0A0K9R680_SPIOL Phosphotransferase OS=Spinacia oleracea OX=3562 GN=SOVF_107480 PE=3 SV=1
TRINITY_DN10031_c0_g1_i8	2644	0	28.94	0	0.35	0	0.23	7.97162	tr|A0A0K9S001|A0A0K9S001_SPIOL Probable tRNA N6-adenosine threonylcarbamoyltransferase OS=Spinacia oleracea OX=3562 GN=GCP2 PE=3 SV=1
TRINITY_DN10303_c0_g1_i3	539	0	28.89	0	2.41	0	1.6	7.97162	-
TRINITY_DN10473_c0_g2_i1	810	0	29	0	1.37	0	0.91	7.97162	-
TRINITY_DN10915_c0_g2_i2	948	0	29.34	0	1.14	0	0.76	7.97162	tr|A0A0K9S2R6|A0A0K9S2R6_SPIOL Uncharacterized protein OS=Spinacia oleracea OX=3562 GN=SOVF_001480 PE=4 SV=1
TRINITY_DN11658_c0_g1_i2	1923	0	29.01	0	0.49	0	0.33	7.97162	tr|A0A0J8B2T9|A0A0J8B2T9_BETVU Ammonium transporter OS=Beta vulgaris subsp. vulgaris OX=3555 GN=BVRB_008290 PE=3 SV=1
TRINITY_DN11789_c0_g1_i1	1615	0	28.87	0	0.6	0	0.4	7.97162	tr|A0A0K9RRG7|A0A0K9RRG7_SPIOL Uncharacterized protein OS=Spinacia oleracea OX=3562 GN=SOVF_043370 PE=4 SV=1
TRINITY_DN12552_c0_g1_i1	380	0	29.02	0	4.36	0	2.9	7.97162	-
TRINITY_DN12696_c0_g1_i1	2203	0	29	0	0.42	0	0.28	7.97162	tr|A0A0J8B754|A0A0J8B754_BETVU Uncharacterized protein OS=Beta vulgaris subsp. vulgaris OX=3555 GN=BVRB_005020 PE=4 SV=1
TRINITY_DN1330_c0_g1_i3	977	0	29.38	0	1.1	0	0.73	7.97162	tr|A0A0K9QPF7|A0A0K9QPF7_SPIOL Uncharacterized protein OS=Spinacia oleracea OX=3562 GN=SOVF_162300 PE=4 SV=1
TRINITY_DN13981_c0_g1_i13	4655	0	29.46	0	0.19	0	0.13	7.97162	tr|A0A0K9RLU0|A0A0K9RLU0_SPIOL NADPH-dependent diflavin oxidoreductase 1 OS=Spinacia oleracea OX=3562 GN=SOVF_058230 PE=3 SV=1
TRINITY_DN1407_c0_g1_i19	5345	0.02	28.86	0	0.17	0	0.11	7.97162	tr|A0A0K9R6N9|A0A0K9R6N9_SPIOL Uncharacterized protein OS=Spinacia oleracea OX=3562 GN=SOVF_106030 PE=4 SV=1
TRINITY_DN14435_c0_g1_i2	1484	0	29	0	0.66	0	0.44	7.97162	tr|A0A0K9RQK5|A0A0K9RQK5_SPIOL Uncharacterized protein OS=Spinacia oleracea OX=3562 GN=SOVF_045580 PE=3 SV=1
TRINITY_DN15226_c0_g1_i13	433	0	28.79	0	3.42	0	2.27	7.97162	-
TRINITY_DN1582_c1_g1_i4	2528	0	28.85	0	0.36	0	0.24	7.97162	tr|A0A0K9R1X6|A0A0K9R1X6_SPIOL Uncharacterized protein OS=Spinacia oleracea OX=3562 GN=SOVF_121830 PE=4 SV=1
TRINITY_DN17303_c0_g1_i1	1978	0	29	0	0.48	0	0.32	7.97162	tr|A0A0K9R378|A0A0K9R378_SPIOL Uncharacterized protein OS=Spinacia oleracea OX=3562 GN=SOVF_118600 PE=4 SV=1
TRINITY_DN1982_c1_g1_i7	303	0	28.7	0	6.92	0	4.6	7.97162	-
TRINITY_DN20179_c1_g1_i14	3855	0	28.68	0	0.23	0	0.15	7.97162	tr|A0A0J8FG96|A0A0J8FG96_BETVU Beta-galactosidase OS=Beta vulgaris subsp. vulgaris OX=3555 GN=BVRB_3g065740 PE=3 SV=1
TRINITY_DN2330_c0_g1_i7	2229	0	28.82	0	0.42	0	0.28	7.97162	tr|A0A0K9RV95|A0A0K9RV95_SPIOL Uncharacterized protein OS=Spinacia oleracea OX=3562 GN=SOVF_024690 PE=4 SV=1
TRINITY_DN29059_c0_g1_i1	263	0	29	0	9.95	0	6.62	7.97162	-
TRINITY_DN2952_c0_g1_i11	1569	0	29.1	0	0.62	0	0.41	7.97162	tr|A0A0K9RRK8|A0A0K9RRK8_SPIOL Uncharacterized protein OS=Spinacia oleracea OX=3562 GN=SOVF_042970 PE=4 SV=1
TRINITY_DN3443_c0_g1_i1	793	0	29.21	0	1.42	0	0.94	7.97162	tr|A0A0K9QBG5|A0A0K9QBG5_SPIOL Uncharacterized protein OS=Spinacia oleracea OX=3562 GN=SOVF_204870 PE=4 SV=1
TRINITY_DN3589_c0_g1_i2	1707	0	29.08	0	0.56	0	0.38	7.97162	tr|A0A0K9QV63|A0A0K9QV63_SPIOL Uncharacterized protein OS=Spinacia oleracea OX=3562 GN=SOVF_137620 PE=4 SV=1
TRINITY_DN3634_c0_g1_i8	1827	0	29.2	0	0.53	0	0.35	7.97162	tr|A0A0K9QQ05|A0A0K9QQ05_SPIOL Uncharacterized protein OS=Spinacia oleracea OX=3562 GN=SOVF_159710 PE=4 SV=1
TRINITY_DN3673_c0_g1_i23	1853	0	29.08	0	0.52	0	0.34	7.97162	-
TRINITY_DN3717_c0_g1_i3	1249	0	28.97	0	0.8	0	0.54	7.97162	-
TRINITY_DN3738_c0_g1_i2	5298	0	29.35	0	0.17	0	0.11	7.97162	tr|A0A0K9QNK5|A0A0K9QNK5_SPIOL Uncharacterized protein OS=Spinacia oleracea OX=3562 GN=SOVF_159350 PE=4 SV=1
TRINITY_DN3881_c0_g1_i14	3767	0	28.8	0	0.24	0	0.16	7.97162	tr|A0A0K9QPU0|A0A0K9QPU0_SPIOL Uncharacterized protein OS=Spinacia oleracea OX=3562 GN=SOVF_161140 PE=4 SV=1
TRINITY_DN4009_c0_g1_i4	2212	0	28.79	0	0.42	0	0.28	7.97162	tr|A0A0K9QHJ2|A0A0K9QHJ2_SPIOL Uncharacterized protein OS=Spinacia oleracea OX=3562 GN=SOVF_184490 PE=4 SV=1
TRINITY_DN4590_c0_g1_i6	1045	0	28.82	0	0.99	0	0.66	7.97162	tr|A0A0J8ER81|A0A0J8ER81_BETVU Uncharacterized protein OS=Beta vulgaris subsp. vulgaris OX=3555 GN=BVRB_7g168070 PE=4 SV=1
TRINITY_DN5059_c0_g1_i5	2812	0.01	29.2	0	0.33	0	0.22	7.97162	tr|A0A0J8BBV9|A0A0J8BBV9_BETVU Uncharacterized protein OS=Beta vulgaris subsp. vulgaris OX=3555 GN=BVRB_5g127170 PE=4 SV=1
TRINITY_DN5394_c0_g1_i1	1256	0	28.95	0	0.8	0	0.53	7.97162	tr|A0A0K9RQ48|A0A0K9RQ48_SPIOL Uncharacterized protein OS=Spinacia oleracea OX=3562 GN=SOVF_041390 PE=4 SV=1
TRINITY_DN5808_c0_g1_i4	907	0	29.04	0	1.19	0	0.79	7.97162	-
TRINITY_DN6568_c0_g3_i1	1170	0	29	0	0.87	0	0.58	7.97162	-
TRINITY_DN6581_c0_g1_i17	2014	0.22	28.81	0	0.47	0	0.31	7.97162	tr|A0A0K9R3C1|A0A0K9R3C1_SPIOL Uncharacterized protein OS=Spinacia oleracea OX=3562 GN=SOVF_111370 PE=4 SV=1
TRINITY_DN8412_c0_g1_i3	3420	0	28.94	0	0.26	0	0.18	7.97162	tr|A0A0K9RVG0|A0A0K9RVG0_SPIOL Uncharacterized protein OS=Spinacia oleracea OX=3562 GN=SOVF_024730 PE=3 SV=1
TRINITY_DN8443_c0_g2_i2	2339	0	29	0	0.4	0	0.26	7.97162	-
TRINITY_DN913_c0_g1_i5	2281	0	28.85	0	0.41	0	0.27	7.97162	tr|A0A221C784|A0A221C784_AMATR NADP-malate dehydrogenase OS=Amaranthus tricolor OX=29722 PE=2 SV=1
TRINITY_DN9176_c0_g1_i4	2904	0	28.9	0	0.31	0	0.21	7.97162	tr|A0A0K9RNX0|A0A0K9RNX0_SPIOL Uncharacterized protein (Fragment) OS=Spinacia oleracea OX=3562 GN=SOVF_045380 PE=4 SV=1
TRINITY_DN9387_c1_g1_i3	690	0	29.26	0	1.71	0	1.14	7.97162	tr|A0A0K9RL08|A0A0K9RL08_SPIOL Uncharacterized protein OS=Spinacia oleracea OX=3562 GN=SOVF_054960 PE=3 SV=1
TRINITY_DN1008_c1_g1_i10	1845	0	28.13	0	0.5	0	0.33	7.9212	tr|A0A0K9R4V4|A0A0K9R4V4_SPIOL Uncharacterized protein OS=Spinacia oleracea OX=3562 GN=SOVF_106210 PE=4 SV=1
TRINITY_DN1070_c1_g1_i4	5405	0	28.26	0	0.16	0	0.11	7.9212	tr|A0A0K9RRB0|A0A0K9RRB0_SPIOL Uncharacterized protein OS=Spinacia oleracea OX=3562 GN=SOVF_037630 PE=4 SV=1
TRINITY_DN11043_c0_g1_i3	1016	0	28.27	0	1	0	0.67	7.9212	tr|A0A0K9REE0|A0A0K9REE0_SPIOL Uncharacterized protein OS=Spinacia oleracea OX=3562 GN=SOVF_080960 PE=4 SV=1
TRINITY_DN11300_c0_g1_i1	213	0	28	0	18.28	0	12.16	7.9212	-
TRINITY_DN13975_c1_g1_i1	542	0	28	0	2.31	0	1.54	7.9212	tr|E7BQD5|E7BQD5_SILLA Gag-pol polyprotein OS=Silene latifolia OX=37657 PE=4 SV=1
TRINITY_DN1409_c0_g1_i16	2849	0	27.95	0	0.31	0	0.21	7.9212	tr|A0A0K9R1L9|A0A0K9R1L9_SPIOL Uncharacterized protein OS=Spinacia oleracea OX=3562 GN=SOVF_122370 PE=4 SV=1
TRINITY_DN14950_c0_g1_i3	2265	0	28.24	0	0.4	0	0.27	7.9212	tr|A0A0J8E7P7|A0A0J8E7P7_BETVU Uncharacterized protein OS=Beta vulgaris subsp. vulgaris OX=3555 GN=BVRB_2g047540 PE=4 SV=1
TRINITY_DN1900_c0_g2_i10	2390	0	28.03	0	0.38	0	0.25	7.9212	tr|A0A0K9R954|A0A0K9R954_SPIOL Uncharacterized protein OS=Spinacia oleracea OX=3562 GN=SOVF_091630 PE=4 SV=1
TRINITY_DN2993_c0_g1_i12	2132	0.04	27.84	0	0.42	0	0.28	7.9212	tr|A0A0K9RKL4|A0A0K9RKL4_SPIOL Uncharacterized protein OS=Spinacia oleracea OX=3562 GN=SOVF_056210 PE=4 SV=1
TRINITY_DN3607_c0_g1_i11	4065	0	28.15	0	0.21	0	0.14	7.9212	tr|A0A0J8BC10|A0A0J8BC10_BETVU Uncharacterized protein OS=Beta vulgaris subsp. vulgaris OX=3555 GN=BVRB_3g067980 PE=4 SV=1
TRINITY_DN4590_c0_g1_i5	3562	0	28.4	0	0.25	0	0.17	7.9212	tr|A0A0J8BVE0|A0A0J8BVE0_BETVU Uncharacterized protein OS=Beta vulgaris subsp. vulgaris OX=3555 GN=BVRB_7g168070 PE=4 SV=1
TRINITY_DN4836_c0_g1_i6	1301	0	27.6	0	0.73	0	0.49	7.9212	-
TRINITY_DN5144_c0_g1_i22	1679	0.35	27.9	0.01	0.55	0	0.37	7.9212	-
TRINITY_DN5257_c0_g1_i7	493	0	28.25	0	2.7	0	1.8	7.9212	tr|A0A0K9RQL8|A0A0K9RQL8_SPIOL Uncharacterized protein OS=Spinacia oleracea OX=3562 GN=SOVF_045720 PE=4 SV=1
TRINITY_DN5277_c1_g1_i3	3879	0	27.94	0	0.22	0	0.15	7.9212	tr|A0A0K9RRW9|A0A0K9RRW9_SPIOL Uncharacterized protein OS=Spinacia oleracea OX=3562 GN=SOVF_042140 PE=4 SV=1
TRINITY_DN5994_c0_g1_i1	3682	0	27.63	0	0.23	0	0.16	7.9212	tr|A0A0K9R1G4|A0A0K9R1G4_SPIOL Plasma membrane ATPase OS=Spinacia oleracea OX=3562 GN=SOVF_123960 PE=3 SV=1
TRINITY_DN6116_c0_g3_i1	399	0	28	0	3.84	0	2.56	7.9212	-
TRINITY_DN6317_c0_g2_i3	533	0	28	0	2.37	0	1.58	7.9212	-
TRINITY_DN6447_c0_g1_i16	2121	0	28.06	0	0.43	0	0.28	7.9212	tr|A0A0K9RVK7|A0A0K9RVK7_SPIOL Uncharacterized protein OS=Spinacia oleracea OX=3562 GN=SOVF_029810 PE=3 SV=1
TRINITY_DN6448_c0_g3_i4	1207	0	28.13	0	0.81	0	0.54	7.9212	-
TRINITY_DN68_c1_g1_i8	3666	0	27.99	0	0.24	0	0.16	7.9212	tr|A0A0K9QS11|A0A0K9QS11_SPIOL Uncharacterized protein OS=Spinacia oleracea OX=3562 GN=SOVF_147830 PE=4 SV=1
TRINITY_DN7035_c0_g1_i1	656	0	28	0	1.75	0	1.17	7.9212	-
TRINITY_DN8086_c0_g4_i1	953	0	28.18	0	1.08	0	0.72	7.9212	tr|A0A0K9R831|A0A0K9R831_SPIOL Uncharacterized protein OS=Spinacia oleracea OX=3562 GN=SOVF_096280 PE=3 SV=1
TRINITY_DN897_c0_g1_i17	2560	0.49	27.62	0.01	0.34	0	0.23	7.9212	tr|A0A0K9RGC9|A0A0K9RGC9_SPIOL Beta-galactosidase OS=Spinacia oleracea OX=3562 GN=SOVF_074550 PE=3 SV=1
TRINITY_DN9623_c0_g1_i4	2854	0	28.49	0	0.32	0	0.21	7.9212	tr|A0A0K9R5L6|A0A0K9R5L6_SPIOL Uncharacterized protein OS=Spinacia oleracea OX=3562 GN=SOVF_104290 PE=4 SV=1
TRINITY_DN9655_c0_g1_i5	4220	0	27.92	0	0.2	0	0.14	7.9212	tr|A0A0K9RLX2|A0A0K9RLX2_SPIOL Uncharacterized protein OS=Spinacia oleracea OX=3562 GN=SOVF_051940 PE=4 SV=1
TRINITY_DN20187_c0_g1_i1	934	165	34579	6.29	1363.37	4.33	907.16	7.91837	tr|A0A0K9QUW2|A0A0K9QUW2_SPIOL Uncharacterized protein OS=Spinacia oleracea OX=3562 GN=SOVF_145660 PE=3 SV=1
TRINITY_DN1059_c0_g1_i7	2681	0	26.9	0	0.32	0	0.21	7.86895	tr|A0A0K9RY82|A0A0K9RY82_SPIOL Uncharacterized protein OS=Spinacia oleracea OX=3562 GN=SOVF_021870 PE=4 SV=1
TRINITY_DN11994_c0_g1_i3	1053	0	26.85	0	0.91	0	0.61	7.86895	tr|A0A0K9RU15|A0A0K9RU15_SPIOL Uncharacterized protein OS=Spinacia oleracea OX=3562 GN=SOVF_028240 PE=4 SV=1
TRINITY_DN1435_c0_g1_i10	3721	0	27.49	0	0.23	0	0.15	7.86895	tr|A0A0K9QGN9|A0A0K9QGN9_SPIOL Uncharacterized protein OS=Spinacia oleracea OX=3562 GN=SOVF_186690 PE=4 SV=1
TRINITY_DN1704_c0_g4_i3	2684	0	26.7	0	0.32	0	0.21	7.86895	tr|A0A0J8CGJ4|A0A0J8CGJ4_BETVU Uncharacterized protein OS=Beta vulgaris subsp. vulgaris OX=3555 GN=BVRB_4g091160 PE=4 SV=1
TRINITY_DN17208_c0_g1_i2	2015	0	26.67	0	0.43	0	0.29	7.86895	tr|A0A0K9QLD0|A0A0K9QLD0_SPIOL Uncharacterized protein OS=Spinacia oleracea OX=3562 GN=SOVF_171320 PE=3 SV=1
TRINITY_DN18796_c0_g1_i4	2253	0	27.35	0	0.39	0	0.26	7.86895	tr|E2DN00|E2DN00_BETVU Uncharacterized protein OS=Beta vulgaris OX=161934 PE=4 SV=1
TRINITY_DN1933_c0_g1_i4	233	0	27	0	13.13	0	8.73	7.86895	-
TRINITY_DN19852_c0_g2_i1	946	0	27	0	1.05	0	0.7	7.86895	tr|A0A0K9QS51|A0A0K9QS51_SPIOL Uncharacterized protein (Fragment) OS=Spinacia oleracea OX=3562 GN=SOVF_147670 PE=4 SV=1
TRINITY_DN2292_c0_g1_i1	2689	0	27.42	0	0.32	0	0.22	7.86895	tr|A0A0J8CMS0|A0A0J8CMS0_BETVU Uncharacterized protein OS=Beta vulgaris subsp. vulgaris OX=3555 GN=BVRB_3g065560 PE=4 SV=1
TRINITY_DN2499_c0_g1_i11	9294	0	26.95	0	0.09	0	0.06	7.86895	tr|A0A0K9S2M9|A0A0K9S2M9_SPIOL Uncharacterized protein OS=Spinacia oleracea OX=3562 GN=SOVF_001850 PE=4 SV=1
TRINITY_DN2548_c0_g1_i23	2901	0.42	26.95	0	0.29	0	0.2	7.86895	tr|A0A0J8BBB4|A0A0J8BBB4_BETVU Uncharacterized protein OS=Beta vulgaris subsp. vulgaris OX=3555 GN=BVRB_4g095040 PE=4 SV=1
TRINITY_DN3112_c0_g1_i4	4256	0	26.7	0	0.19	0	0.13	7.86895	-
TRINITY_DN3323_c0_g1_i3	804	0	27.15	0	1.3	0	0.86	7.86895	tr|A0A0K9RWN5|A0A0K9RWN5_SPIOL Uncharacterized protein OS=Spinacia oleracea OX=3562 GN=SOVF_025740 PE=4 SV=1
TRINITY_DN3331_c1_g2_i12	1487	0	27.24	0	0.62	0	0.41	7.86895	tr|A0A0K9RW01|A0A0K9RW01_SPIOL Protein BCCIP homolog OS=Spinacia oleracea OX=3562 GN=SOVF_023470 PE=3 SV=1
TRINITY_DN3592_c0_g1_i1	3022	0.19	26.52	0	0.28	0	0.18	7.86895	tr|A0A0K9R906|A0A0K9R906_SPIOL Uncharacterized protein OS=Spinacia oleracea OX=3562 GN=SOVF_093470 PE=4 SV=1
TRINITY_DN3649_c0_g1_i6	2754	0	27.31	0	0.31	0	0.21	7.86895	tr|A0A0K9RW97|A0A0K9RW97_SPIOL Uncharacterized protein OS=Spinacia oleracea OX=3562 GN=SOVF_021790 PE=4 SV=1
TRINITY_DN3862_c0_g2_i1	1445	0	27.31	0	0.64	0	0.43	7.86895	-
TRINITY_DN4255_c0_g1_i4	1908	0	26.56	0	0.46	0	0.3	7.86895	tr|A0A0K9QLL8|A0A0K9QLL8_SPIOL Uncharacterized protein OS=Spinacia oleracea OX=3562 GN=SOVF_165320 PE=4 SV=1
TRINITY_DN4456_c0_g2_i20	4973	0	26.56	0	0.16	0	0.11	7.86895	tr|A0A0K9QDS3|A0A0K9QDS3_SPIOL Uncharacterized protein (Fragment) OS=Spinacia oleracea OX=3562 GN=SOVF_190600 PE=4 SV=1
TRINITY_DN4513_c0_g1_i7	694	0	26.77	0	1.55	0	1.03	7.86895	-
TRINITY_DN4560_c0_g2_i6	2553	0	26.7	0	0.33	0	0.22	7.86895	tr|A0A0J8B9F6|A0A0J8B9F6_BETVU Uncharacterized protein OS=Beta vulgaris subsp. vulgaris OX=3555 GN=BVRB_4g097190 PE=3 SV=1
TRINITY_DN5041_c0_g1_i8	1498	0	26.95	0	0.61	0	0.4	7.86895	tr|A0A0K9S280|A0A0K9S280_SPIOL Uncharacterized protein OS=Spinacia oleracea OX=3562 GN=SOVF_007830 PE=4 SV=1
TRINITY_DN6075_c1_g1_i7	4982	0	27.44	0	0.17	0	0.11	7.86895	tr|A0A0K9QWV8|A0A0K9QWV8_SPIOL Uncharacterized protein OS=Spinacia oleracea OX=3562 GN=SOVF_139110 PE=4 SV=1
TRINITY_DN623_c0_g1_i12	2708	0.01	26.83	0	0.31	0	0.21	7.86895	tr|J3SHR5|J3SHR5_BETVU SNF2 domain-containing protein ATRX/CHR20 OS=Beta vulgaris subsp. vulgaris OX=3555 PE=4 SV=1
TRINITY_DN7004_c1_g2_i4	2289	0	26.83	0	0.38	0	0.25	7.86895	tr|A0A0K9QRD9|A0A0K9QRD9_SPIOL Ubiquinone biosynthesis O-methyltransferase, mitochondrial OS=Spinacia oleracea OX=3562 GN=COQ3 PE=3 SV=1
TRINITY_DN717_c0_g3_i3	2611	0	27.08	0	0.33	0	0.22	7.86895	sp|O49044|SODC2_MESCR Superoxide dismutase [Cu-Zn] 2 OS=Mesembryanthemum crystallinum OX=3544 GN=SODCC.2 PE=2 SV=1
TRINITY_DN7407_c1_g1_i4	361	0	26.89	0	4.46	0	2.97	7.86895	-
TRINITY_DN7932_c0_g1_i12	1572	0.18	26.56	0	0.57	0	0.38	7.86895	tr|A0A0K9RIW2|A0A0K9RIW2_SPIOL Peptidylprolyl isomerase OS=Spinacia oleracea OX=3562 GN=SOVF_061710 PE=4 SV=1
TRINITY_DN8493_c0_g1_i23	2367	0	26.86	0	0.36	0	0.24	7.86895	tr|A0A0K9QGG6|A0A0K9QGG6_SPIOL Uncharacterized protein (Fragment) OS=Spinacia oleracea OX=3562 GN=SOVF_187450 PE=4 SV=1
TRINITY_DN9608_c0_g1_i4	3295	0	27.07	0	0.26	0	0.17	7.86895	tr|A0A0K9RUZ2|A0A0K9RUZ2_SPIOL COBRA-like protein OS=Spinacia oleracea OX=3562 GN=SOVF_025610 PE=3 SV=1
TRINITY_DN9953_c0_g1_i1	2023	0	27.21	0	0.44	0	0.29	7.86895	tr|A0A0K9QM20|A0A0K9QM20_SPIOL Uncharacterized protein OS=Spinacia oleracea OX=3562 GN=SOVF_170270 PE=4 SV=1
TRINITY_DN8312_c0_g2_i1	3133	3.79	826.33	0.04	8.28	0.03	5.51	7.85091	tr|Q0PEL6|Q0PEL6_BETVU Putative integrase OS=Beta vulgaris OX=161934 PE=4 SV=1
TRINITY_DN10135_c0_g1_i11	2707	0.02	25.75	0	0.3	0	0.2	7.81474	tr|A0A0K9RZM9|A0A0K9RZM9_SPIOL Uncharacterized protein OS=Spinacia oleracea OX=3562 GN=SOVF_010930 PE=4 SV=1
TRINITY_DN10434_c0_g1_i10	1452	0	26.04	0	0.61	0	0.4	7.81474	tr|J3SIC5|J3SIC5_BETVU Calmcium/calmodulin-dependent protein kinase CDPK2 OS=Beta vulgaris subsp. vulgaris OX=3555 PE=3 SV=1
TRINITY_DN10574_c0_g1_i7	1579	0.11	26.32	0	0.56	0	0.37	7.81474	tr|A0A0K9S237|A0A0K9S237_SPIOL Mechanosensitive ion channel protein OS=Spinacia oleracea OX=3562 GN=SOVF_008150 PE=3 SV=1
TRINITY_DN11043_c0_g1_i4	488	0	26.4	0	2.57	0	1.71	7.81474	tr|A0A0K9REE0|A0A0K9REE0_SPIOL Uncharacterized protein OS=Spinacia oleracea OX=3562 GN=SOVF_080960 PE=4 SV=1
TRINITY_DN11247_c0_g1_i3	964	0	26.32	0	1	0	0.66	7.81474	-
TRINITY_DN11325_c0_g1_i5	1202	0	26.13	0	0.76	0	0.5	7.81474	tr|A0A0K9QEF0|A0A0K9QEF0_SPIOL Ubiquinol oxidase OS=Spinacia oleracea OX=3562 GN=SOVF_195140 PE=3 SV=1
TRINITY_DN12166_c0_g1_i2	558	0	26	0	2.06	0	1.37	7.81474	-
TRINITY_DN14289_c0_g1_i2	955	0	26	0	1	0	0.66	7.81474	-
TRINITY_DN14642_c0_g1_i10	1795	0	25.58	0	0.47	0	0.31	7.81474	tr|A0A0K9QVB7|A0A0K9QVB7_SPIOL Uncharacterized protein OS=Spinacia oleracea OX=3562 GN=SOVF_144170 PE=4 SV=1
TRINITY_DN148_c3_g1_i11	706	0	25.51	0	1.45	0	0.96	7.81474	-
TRINITY_DN16871_c0_g1_i7	966	0	25.65	0	0.97	0	0.65	7.81474	tr|A0A0K9R5U3|A0A0K9R5U3_SPIOL Uncharacterized protein OS=Spinacia oleracea OX=3562 GN=SOVF_110060 PE=4 SV=1
TRINITY_DN1799_c0_g1_i5	3031	0	26.5	0	0.28	0	0.18	7.81474	tr|A0A0K9RGC0|A0A0K9RGC0_SPIOL Uncharacterized protein OS=Spinacia oleracea OX=3562 GN=SOVF_069940 PE=3 SV=1
TRINITY_DN18928_c0_g1_i1	583	0	26.01	0	1.93	0	1.28	7.81474	-
TRINITY_DN2052_c0_g1_i7	2745	0	25.76	0	0.3	0	0.2	7.81474	tr|A0A0K9QV60|A0A0K9QV60_SPIOL Uncharacterized protein OS=Spinacia oleracea OX=3562 GN=SOVF_137740 PE=3 SV=1
TRINITY_DN23422_c0_g1_i2	813	0	25.68	0	1.21	0	0.8	7.81474	tr|A0A0K9R1U6|A0A0K9R1U6_SPIOL Uncharacterized protein OS=Spinacia oleracea OX=3562 GN=SOVF_116290 PE=4 SV=1
TRINITY_DN2381_c0_g1_i14	533	0	25.62	0	2.17	0	1.44	7.81474	-
TRINITY_DN3152_c0_g1_i16	4476	0	26.18	0	0.18	0	0.12	7.81474	tr|A0A0K9R5X9|A0A0K9R5X9_SPIOL Acetyl-coenzyme A synthetase OS=Spinacia oleracea OX=3562 GN=SOVF_108190 PE=3 SV=1
TRINITY_DN3204_c0_g1_i9	1696	0	26.09	0	0.51	0	0.34	7.81474	tr|A0A0K9QG75|A0A0K9QG75_SPIOL Uncharacterized protein OS=Spinacia oleracea OX=3562 GN=SOVF_182730 PE=4 SV=1
TRINITY_DN3882_c0_g2_i6	2305	0	25.74	0	0.36	0	0.24	7.81474	tr|A0A0K9RZA1|A0A0K9RZA1_SPIOL Uncharacterized protein OS=Spinacia oleracea OX=3562 GN=SOVF_011930 PE=4 SV=1
TRINITY_DN4636_c0_g1_i6	500	0	26.26	0	2.46	0	1.64	7.81474	-
TRINITY_DN4921_c0_g1_i18	4189	0	25.93	0	0.19	0	0.13	7.81474	tr|A0A0K9R015|A0A0K9R015_SPIOL Uncharacterized protein (Fragment) OS=Spinacia oleracea OX=3562 GN=SOVF_122240 PE=4 SV=1
TRINITY_DN5104_c0_g1_i1	1689	0	26.21	0	0.51	0	0.34	7.81474	tr|A0A0K9RWF0|A0A0K9RWF0_SPIOL Uncharacterized protein OS=Spinacia oleracea OX=3562 GN=SOVF_020810 PE=4 SV=1
TRINITY_DN5384_c0_g1_i8	1443	0	26.5	0	0.62	0	0.41	7.81474	tr|A0A0K9QJV5|A0A0K9QJV5_SPIOL Uncharacterized protein (Fragment) OS=Spinacia oleracea OX=3562 GN=SOVF_175270 PE=3 SV=1
TRINITY_DN579_c0_g1_i14	3568	0	26.03	0	0.23	0	0.15	7.81474	tr|A0A0K9QYF0|A0A0K9QYF0_SPIOL Uncharacterized protein OS=Spinacia oleracea OX=3562 GN=SOVF_132420 PE=4 SV=1
TRINITY_DN5875_c0_g1_i16	2994	0	25.57	0	0.27	0	0.18	7.81474	tr|A0A0K9QPX6|A0A0K9QPX6_SPIOL Uncharacterized protein OS=Spinacia oleracea OX=3562 GN=SOVF_154670 PE=4 SV=1
TRINITY_DN6149_c0_g1_i1	1616	0	25.62	0	0.53	0	0.35	7.81474	tr|A0A0K9QIR1|A0A0K9QIR1_SPIOL Uncharacterized protein OS=Spinacia oleracea OX=3562 GN=SOVF_179580 PE=4 SV=1
TRINITY_DN6448_c0_g3_i8	818	0	26.45	0	1.23	0	0.82	7.81474	tr|A0A0K9RJ65|A0A0K9RJ65_SPIOL Uncharacterized protein OS=Spinacia oleracea OX=3562 GN=SOVF_066480 PE=4 SV=1
TRINITY_DN699_c0_g4_i3	1028	0	26.17	0	0.92	0	0.61	7.81474	-
TRINITY_DN7651_c2_g1_i2	472	0	26	0	2.67	0	1.78	7.81474	tr|A0A0K9S108|A0A0K9S108_SPIOL Lipoxygenase OS=Spinacia oleracea OX=3562 GN=SOVF_005490 PE=3 SV=1
TRINITY_DN939_c1_g1_i6	2700	0	26.5	0	0.31	0	0.21	7.81474	tr|A0A0K9RL26|A0A0K9RL26_SPIOL Uncharacterized protein OS=Spinacia oleracea OX=3562 GN=SOVF_059960 PE=3 SV=1
TRINITY_DN967_c0_g1_i12	1277	0	25.92	0	0.7	0	0.47	7.81474	-
TRINITY_DN982_c1_g1_i2	8407	0	25.92	0	0.09	0	0.06	7.81474	tr|A0A0K9R7A1|A0A0K9R7A1_SPIOL Uncharacterized protein OS=Spinacia oleracea OX=3562 GN=SOVF_103520 PE=4 SV=1
TRINITY_DN992_c0_g3_i2	359	0	26.33	0	4.42	0	2.94	7.81474	-
TRINITY_DN9930_c0_g2_i5	1641	0	26.26	0	0.53	0	0.35	7.81474	tr|A0A0K9QIP5|A0A0K9QIP5_SPIOL Serine/threonine-protein phosphatase OS=Spinacia oleracea OX=3562 GN=SOVF_174900 PE=3 SV=1
TRINITY_DN1784_c0_g2_i7	4137	12.79	2465.54	0.09	18.44	0.06	12.27	7.76104	tr|A0A0K9R7M3|A0A0K9R7M3_SPIOL Uncharacterized protein OS=Spinacia oleracea OX=3562 GN=SOVF_104770 PE=3 SV=1
TRINITY_DN10321_c0_g1_i1	623	0	25	0	1.68	0	1.12	7.75842	-
TRINITY_DN10393_c0_g1_i3	1193	0	24.92	0	0.73	0	0.49	7.75842	tr|Q711H9|Q711H9_BETVU Soluble pyrophosphatase OS=Beta vulgaris OX=161934 GN=ppa1 PE=2 SV=1
TRINITY_DN11070_c0_g1_i1	700	0	25	0	1.43	0	0.95	7.75842	-
TRINITY_DN116_c0_g1_i3	2578	0	24.56	0	0.3	0	0.2	7.75842	tr|A0A0K9QE75|A0A0K9QE75_SPIOL Cysteine protease OS=Spinacia oleracea OX=3562 GN=SOVF_189160 PE=3 SV=1
TRINITY_DN12711_c0_g2_i4	302	0	24.59	0	5.98	0	3.98	7.75842	-
TRINITY_DN1318_c0_g1_i11	2399	0	25.47	0	0.34	0	0.23	7.75842	tr|A0A0K9S287|A0A0K9S287_SPIOL Uncharacterized protein OS=Spinacia oleracea OX=3562 GN=SOVF_003080 PE=4 SV=1
TRINITY_DN1320_c0_g1_i12	1819	0	24.59	0	0.44	0	0.3	7.75842	tr|A0A0K9RTF0|A0A0K9RTF0_SPIOL Uncharacterized protein OS=Spinacia oleracea OX=3562 GN=SOVF_030520 PE=4 SV=1
TRINITY_DN1354_c2_g1_i8	324	0	24.52	0	5.09	0	3.39	7.75842	-
TRINITY_DN13598_c0_g1_i19	3033	0	24.7	0	0.26	0	0.17	7.75842	tr|A0A0K9QXW2|A0A0K9QXW2_SPIOL Uncharacterized protein OS=Spinacia oleracea OX=3562 GN=SOVF_135830 PE=4 SV=1
TRINITY_DN13735_c0_g3_i3	546	0	24.94	0	2.04	0	1.36	7.75842	-
TRINITY_DN13981_c0_g1_i6	4881	0	25.06	0	0.16	0	0.1	7.75842	tr|A0A0K9RLU0|A0A0K9RLU0_SPIOL NADPH-dependent diflavin oxidoreductase 1 OS=Spinacia oleracea OX=3562 GN=SOVF_058230 PE=3 SV=1
TRINITY_DN1530_c1_g1_i1	491	0	25	0	2.41	0	1.6	7.75842	-
TRINITY_DN1704_c0_g4_i2	2809	0	24.6	0	0.28	0	0.18	7.75842	tr|A0A0J8CGJ4|A0A0J8CGJ4_BETVU Uncharacterized protein OS=Beta vulgaris subsp. vulgaris OX=3555 GN=BVRB_4g091160 PE=4 SV=1
TRINITY_DN18213_c0_g1_i1	1158	0	25	0	0.76	0	0.51	7.75842	-
TRINITY_DN18670_c0_g1_i4	2004	0.38	25.17	0.01	0.41	0	0.27	7.75842	tr|A0A0J8B4S7|A0A0J8B4S7_BETVU Uncharacterized protein OS=Beta vulgaris subsp. vulgaris OX=3555 GN=BVRB_001240 PE=4 SV=1
TRINITY_DN187_c0_g3_i13	3738	0	25.34	0	0.21	0	0.14	7.75842	tr|A0A1Z4EAY1|A0A1Z4EAY1_BETVU Serine hydroxymethyltransferase OS=Beta vulgaris OX=161934 GN=BvSHMTb PE=2 SV=1
TRINITY_DN192_c0_g1_i3	1023	0	24.75	0	0.87	0	0.58	7.75842	tr|A0A0K9QSI1|A0A0K9QSI1_SPIOL Uncharacterized protein OS=Spinacia oleracea OX=3562 GN=SOVF_146390 PE=4 SV=1
TRINITY_DN2069_c0_g1_i14	1279	0	25.25	0	0.68	0	0.45	7.75842	tr|A0A0K9RXS6|A0A0K9RXS6_SPIOL Molybdopterin synthase catalytic subunit OS=Spinacia oleracea OX=3562 GN=SOVF_016450 PE=3 SV=1
TRINITY_DN2069_c0_g1_i3	297	0	24.78	0	6.26	0	4.17	7.75842	-
TRINITY_DN21831_c0_g1_i1	516	0	25	0	2.23	0	1.48	7.75842	-
TRINITY_DN2305_c2_g1_i9	2898	0.11	25.21	0	0.27	0	0.18	7.75842	tr|A0A0K9S2I1|A0A0K9S2I1_SPIOL Carboxypeptidase OS=Spinacia oleracea OX=3562 GN=SOVF_007550 PE=3 SV=1
TRINITY_DN2642_c0_g1_i5	1629	0	24.51	0	0.5	0	0.33	7.75842	tr|A0A0K9RWM6|A0A0K9RWM6_SPIOL Uncharacterized protein OS=Spinacia oleracea OX=3562 GN=SOVF_019600 PE=4 SV=1
TRINITY_DN299_c0_g2_i2	1772	0	24.55	0	0.46	0	0.3	7.75842	tr|A0A0K9RI12|A0A0K9RI12_SPIOL Uncharacterized protein OS=Spinacia oleracea OX=3562 GN=SOVF_064550 PE=4 SV=1
TRINITY_DN3817_c0_g1_i6	1540	0	24.67	0	0.54	0	0.36	7.75842	tr|A0A0K9QVV9|A0A0K9QVV9_SPIOL Uncharacterized protein OS=Spinacia oleracea OX=3562 GN=SOVF_135450 PE=4 SV=1
TRINITY_DN3836_c0_g2_i3	789	0	24.89	0	1.22	0	0.81	7.75842	tr|A0A0K9QFK6|A0A0K9QFK6_SPIOL Uncharacterized protein OS=Spinacia oleracea OX=3562 GN=SOVF_184640 PE=3 SV=1
TRINITY_DN4479_c0_g1_i9	3239	0	24.57	0	0.24	0	0.16	7.75842	tr|A0A0K9RDR1|A0A0K9RDR1_SPIOL Uncharacterized protein OS=Spinacia oleracea OX=3562 GN=SOVF_078230 PE=4 SV=1
TRINITY_DN4546_c0_g1_i20	328	0	25.28	0	5.11	0	3.4	7.75842	-
TRINITY_DN4555_c0_g1_i6	1963	0	25.21	0	0.42	0	0.28	7.75842	tr|A0A0K9RZ28|A0A0K9RZ28_SPIOL Uncharacterized protein (Fragment) OS=Spinacia oleracea OX=3562 GN=SOVF_013310 PE=4 SV=1
TRINITY_DN5454_c0_g1_i5	3522	0	25.24	0	0.22	0	0.15	7.75842	tr|A0A0K9RUI3|A0A0K9RUI3_SPIOL Uncharacterized protein OS=Spinacia oleracea OX=3562 GN=SOVF_033670 PE=4 SV=1
TRINITY_DN56511_c0_g1_i1	832	0	25	0	1.14	0	0.76	7.75842	tr|A0A0K9RTJ3|A0A0K9RTJ3_SPIOL Uncharacterized protein OS=Spinacia oleracea OX=3562 GN=SOVF_029800 PE=4 SV=1
TRINITY_DN5812_c0_g1_i7	1524	0.02	24.89	0	0.55	0	0.37	7.75842	tr|A0A0K9RU54|A0A0K9RU54_SPIOL Uncharacterized protein OS=Spinacia oleracea OX=3562 GN=SOVF_035020 PE=4 SV=1
TRINITY_DN6061_c0_g2_i4	992	0	24.71	0	0.9	0	0.6	7.75842	tr|A0A0J8B705|A0A0J8B705_BETVU Uncharacterized protein OS=Beta vulgaris subsp. vulgaris OX=3555 GN=BVRB_005450 PE=3 SV=1
TRINITY_DN6149_c0_g1_i6	1503	0	25.48	0	0.57	0	0.38	7.75842	tr|A0A0K9QIR1|A0A0K9QIR1_SPIOL Uncharacterized protein OS=Spinacia oleracea OX=3562 GN=SOVF_179580 PE=4 SV=1
TRINITY_DN6639_c0_g2_i1	1867	0	25.14	0	0.44	0	0.29	7.75842	tr|A0A0K9QJM3|A0A0K9QJM3_SPIOL NADPH-protochlorophyllide oxidoreductase OS=Spinacia oleracea OX=3562 GN=SOVF_171730 PE=3 SV=1
TRINITY_DN6682_c0_g1_i6	2355	0	24.64	0	0.34	0	0.22	7.75842	tr|A0A0K9R459|A0A0K9R459_SPIOL Uncharacterized protein OS=Spinacia oleracea OX=3562 GN=SOVF_108850 PE=3 SV=1
TRINITY_DN7017_c0_g1_i2	251	0	24.99	0	9.75	0	6.49	7.75842	-
TRINITY_DN8043_c0_g3_i5	1056	0	24.51	0	0.83	0	0.55	7.75842	tr|J3SDF5|J3SDF5_BETVU Ty3/gypsy retrotransposon protein OS=Beta vulgaris subsp. vulgaris OX=3555 PE=4 SV=1
TRINITY_DN8158_c0_g1_i4	2251	0	25.41	0	0.36	0	0.24	7.75842	tr|A0A0K9R161|A0A0K9R161_SPIOL Uncharacterized protein OS=Spinacia oleracea OX=3562 GN=SOVF_118450 PE=4 SV=1
TRINITY_DN8415_c0_g1_i2	774	0	24.55	0	1.23	0	0.82	7.75842	tr|A0A0K9R5E5|A0A0K9R5E5_SPIOL Uncharacterized protein OS=Spinacia oleracea OX=3562 GN=SOVF_104950 PE=4 SV=1
TRINITY_DN8639_c0_g1_i2	550	0	24.67	0	1.99	0	1.33	7.75842	-
TRINITY_DN8741_c1_g2_i1	987	0	25.22	0	0.93	0	0.62	7.75842	tr|F4NCG1|F4NCG1_BETVU Uncharacterized protein OS=Beta vulgaris subsp. vulgaris OX=3555 PE=4 SV=1
TRINITY_DN8946_c0_g1_i14	263	0	25.02	0	8.58	0	5.71	7.75842	-
TRINITY_DN9095_c0_g1_i7	3669	0	24.66	0	0.21	0	0.14	7.75842	tr|A0A0K9R888|A0A0K9R888_SPIOL Uncharacterized protein (Fragment) OS=Spinacia oleracea OX=3562 GN=SOVF_100550 PE=4 SV=1
TRINITY_DN967_c0_g1_i1	1276	0	25.1	0	0.68	0	0.45	7.75842	-
TRINITY_DN18137_c0_g1_i3	276	1	205.35	0.29	62.09	0.2	41.32	7.70712	tr|A0A0K9QCS4|A0A0K9QCS4_SPIOL Uncharacterized protein OS=Spinacia oleracea OX=3562 GN=SOVF_193740 PE=4 SV=1
TRINITY_DN10413_c0_g1_i2	1286	0	24	0	0.64	0	0.43	7.6998	-
TRINITY_DN1087_c0_g1_i7	2822	0	23.79	0	0.27	0	0.18	7.6998	tr|A0A0K9RJX9|A0A0K9RJX9_SPIOL Uncharacterized protein OS=Spinacia oleracea OX=3562 GN=SOVF_057780 PE=4 SV=1
TRINITY_DN11049_c0_g1_i9	5997	0	24.33	0	0.12	0	0.08	7.6998	tr|A0A0K9R5Y2|A0A0K9R5Y2_SPIOL Uncharacterized protein OS=Spinacia oleracea OX=3562 GN=SOVF_108990 PE=3 SV=1
TRINITY_DN11206_c0_g1_i5	873	0	24.15	0	1.04	0	0.69	7.6998	tr|A0A0J8DZ43|A0A0J8DZ43_BETVU Uncharacterized protein OS=Beta vulgaris subsp. vulgaris OX=3555 GN=BVRB_001760 PE=4 SV=1
TRINITY_DN11391_c0_g1_i1	2625	0	23.81	0	0.29	0	0.19	7.6998	tr|A0A0K9QKK3|A0A0K9QKK3_SPIOL Uncharacterized protein OS=Spinacia oleracea OX=3562 GN=SOVF_168380 PE=4 SV=1
TRINITY_DN12183_c0_g1_i1	1951	0	24.37	0	0.41	0	0.27	7.6998	tr|A0A0K9R707|A0A0K9R707_SPIOL Uncharacterized protein OS=Spinacia oleracea OX=3562 GN=SOVF_103750 PE=4 SV=1
TRINITY_DN12219_c0_g3_i5	2201	0	24.5	0	0.36	0	0.24	7.6998	-
TRINITY_DN12601_c0_g1_i2	2687	0	23.51	0	0.28	0	0.18	7.6998	tr|A0A0K9QKD6|A0A0K9QKD6_SPIOL Uncharacterized protein OS=Spinacia oleracea OX=3562 GN=SOVF_175580 PE=4 SV=1
TRINITY_DN13713_c0_g1_i2	1304	0	24.34	0	0.64	0	0.43	7.6998	tr|A0A0K9QS80|A0A0K9QS80_SPIOL Uncharacterized protein OS=Spinacia oleracea OX=3562 GN=SOVF_147270 PE=4 SV=1
TRINITY_DN1420_c0_g1_i10	3112	0	23.65	0	0.24	0	0.16	7.6998	tr|A0A0K9Q940|A0A0K9Q940_SPIOL Uncharacterized protein OS=Spinacia oleracea OX=3562 GN=SOVF_205650 PE=3 SV=1
TRINITY_DN14964_c0_g1_i2	845	0	24	0	1.07	0	0.71	7.6998	tr|A0A0K9QJ36|A0A0K9QJ36_SPIOL Uncharacterized protein (Fragment) OS=Spinacia oleracea OX=3562 GN=SOVF_178590 PE=4 SV=1
TRINITY_DN17519_c0_g3_i1	1992	0	23.94	0	0.39	0	0.26	7.6998	tr|A0A0K9QC90|A0A0K9QC90_SPIOL Uncharacterized protein OS=Spinacia oleracea OX=3562 GN=SOVF_195400 PE=4 SV=1
TRINITY_DN1813_c0_g1_i6	1292	0	23.99	0	0.64	0	0.43	7.6998	tr|A0A0K9QZ85|A0A0K9QZ85_SPIOL Uncharacterized protein OS=Spinacia oleracea OX=3562 GN=SOVF_124740 PE=4 SV=1
TRINITY_DN18820_c0_g2_i4	1372	0.4	24.14	0.01	0.6	0.01	0.4	7.6998	tr|A0A0K9RG05|A0A0K9RG05_SPIOL Uncharacterized protein OS=Spinacia oleracea OX=3562 GN=SOVF_071030 PE=4 SV=1
TRINITY_DN19227_c0_g1_i9	5068	0.3	23.88	0	0.14	0	0.1	7.6998	tr|A0A0K9R725|A0A0K9R725_SPIOL Uncharacterized protein (Fragment) OS=Spinacia oleracea OX=3562 GN=SOVF_099440 PE=4 SV=1
TRINITY_DN19968_c0_g1_i2	550	0	24.27	0	1.96	0	1.31	7.6998	-
TRINITY_DN2074_c0_g1_i3	2038	0.22	24.22	0	0.39	0	0.26	7.6998	tr|A0A0K9QMI1|A0A0K9QMI1_SPIOL Uncharacterized protein OS=Spinacia oleracea OX=3562 GN=SOVF_162600 PE=4 SV=1
TRINITY_DN23391_c0_g1_i1	339	0	24.01	0	4.53	0	3.01	7.6998	-
TRINITY_DN23500_c0_g1_i5	3896	0	24.18	0	0.19	0	0.13	7.6998	tr|A0A0K9R9Q1|A0A0K9R9Q1_SPIOL Uncharacterized protein OS=Spinacia oleracea OX=3562 GN=SOVF_097700 PE=4 SV=1
TRINITY_DN2500_c0_g1_i8	1732	0.1	24.45	0	0.47	0	0.31	7.6998	tr|A0A0K9S096|A0A0K9S096_SPIOL Uncharacterized protein OS=Spinacia oleracea OX=3562 GN=SOVF_014560 PE=3 SV=1
TRINITY_DN2687_c0_g1_i16	2245	0	23.57	0	0.34	0	0.23	7.6998	tr|A0A0J8BA70|A0A0J8BA70_BETVU Uncharacterized protein OS=Beta vulgaris subsp. vulgaris OX=3555 GN=BVRB_8g199800 PE=4 SV=1
TRINITY_DN33129_c0_g1_i1	781	0	24	0	1.19	0	0.79	7.6998	-
TRINITY_DN3442_c0_g1_i6	2103	0	23.81	0	0.37	0	0.24	7.6998	tr|A0A0K9RZK3|A0A0K9RZK3_SPIOL Uncharacterized protein OS=Spinacia oleracea OX=3562 GN=SOVF_017030 PE=3 SV=1
TRINITY_DN3455_c0_g1_i11	2184	0	24.3	0	0.36	0	0.24	7.6998	tr|A0A0K9S3U4|A0A0K9S3U4_SPIOL Vacuolar cation/proton exchanger OS=Spinacia oleracea OX=3562 GN=SOVF_002360 PE=3 SV=1
TRINITY_DN3817_c0_g1_i3	1529	0	23.88	0	0.52	0	0.35	7.6998	tr|A0A0K9QVV9|A0A0K9QVV9_SPIOL Uncharacterized protein OS=Spinacia oleracea OX=3562 GN=SOVF_135450 PE=4 SV=1
TRINITY_DN3884_c0_g1_i10	5638	0	23.58	0	0.13	0	0.09	7.6998	tr|A0A0K9QTX5|A0A0K9QTX5_SPIOL Uncharacterized protein OS=Spinacia oleracea OX=3562 GN=SOVF_141700 PE=4 SV=1
TRINITY_DN4313_c0_g1_i11	4332	0	24.16	0	0.17	0	0.11	7.6998	tr|A0A0K9RZA9|A0A0K9RZA9_SPIOL Uncharacterized protein OS=Spinacia oleracea OX=3562 GN=SOVF_011980 PE=4 SV=1
TRINITY_DN4370_c0_g1_i5	2531	0	24.47	0	0.31	0	0.21	7.6998	tr|A0A0K9QSG1|A0A0K9QSG1_SPIOL Uncharacterized protein OS=Spinacia oleracea OX=3562 GN=SOVF_152040 PE=4 SV=1
TRINITY_DN4376_c0_g2_i5	352	0	24.5	0	4.28	0	2.85	7.6998	-
TRINITY_DN4423_c0_g1_i3	1574	0	24.38	0	0.52	0	0.35	7.6998	tr|A0A0K9QW88|A0A0K9QW88_SPIOL Uncharacterized protein (Fragment) OS=Spinacia oleracea OX=3562 GN=SOVF_134220 PE=4 SV=1
TRINITY_DN4824_c0_g1_i4	2052	0	23.72	0	0.38	0	0.25	7.6998	tr|A0A0K9RWR5|A0A0K9RWR5_SPIOL Uncharacterized protein OS=Spinacia oleracea OX=3562 GN=SOVF_025240 PE=4 SV=1
TRINITY_DN4905_c1_g1_i3	679	0	24.04	0	1.44	0	0.96	7.6998	tr|A0A0J8B8J3|A0A0J8B8J3_BETVU Uncharacterized protein OS=Beta vulgaris subsp. vulgaris OX=3555 GN=BVRB_5g125550 PE=4 SV=1
TRINITY_DN4925_c0_g2_i7	2376	0	23.77	0	0.32	0	0.21	7.6998	tr|A0A0K9QZN6|A0A0K9QZN6_SPIOL Uncharacterized protein OS=Spinacia oleracea OX=3562 GN=SOVF_129780 PE=4 SV=1
TRINITY_DN5618_c0_g2_i3	2261	0	24.35	0	0.35	0	0.23	7.6998	tr|A0A0J8BCE3|A0A0J8BCE3_BETVU Uncharacterized protein OS=Beta vulgaris subsp. vulgaris OX=3555 GN=BVRB_5g125150 PE=4 SV=1
TRINITY_DN6233_c0_g2_i1	2769	0	23.8	0	0.27	0	0.18	7.6998	tr|A0A0K9RHN5|A0A0K9RHN5_SPIOL Uncharacterized protein OS=Spinacia oleracea OX=3562 GN=SOVF_071460 PE=3 SV=1
TRINITY_DN6405_c0_g2_i3	1007	0	23.67	0	0.85	0	0.57	7.6998	tr|A0A0K9QEH7|A0A0K9QEH7_SPIOL Uncharacterized protein OS=Spinacia oleracea OX=3562 GN=SOVF_188140 PE=4 SV=1
TRINITY_DN6629_c0_g1_i9	3988	0	24.35	0	0.19	0	0.13	7.6998	tr|A0A0K9RZP7|A0A0K9RZP7_SPIOL Uncharacterized protein OS=Spinacia oleracea OX=3562 GN=SOVF_015540 PE=4 SV=1
TRINITY_DN68351_c0_g1_i1	635	0	24	0	1.57	0	1.05	7.6998	-
TRINITY_DN7202_c0_g2_i7	2776	0	23.72	0	0.27	0	0.18	7.6998	-
TRINITY_DN7237_c2_g1_i2	802	0	23.94	0	1.15	0	0.76	7.6998	-
TRINITY_DN7474_c0_g1_i2	340	0	23.64	0	4.43	0	2.95	7.6998	-
TRINITY_DN7540_c0_g1_i3	1273	0	23.54	0	0.64	0	0.43	7.6998	tr|A0A0K9RA48|A0A0K9RA48_SPIOL Uncharacterized protein OS=Spinacia oleracea OX=3562 GN=SOVF_089560 PE=4 SV=1
TRINITY_DN884_c0_g1_i12	2027	0.22	23.55	0	0.38	0	0.25	7.6998	tr|A0A0K9R3Z5|A0A0K9R3Z5_SPIOL 3-oxoacyl-[acyl-carrier-protein] synthase OS=Spinacia oleracea OX=3562 GN=SOVF_115730 PE=3 SV=1
TRINITY_DN9586_c0_g1_i2	336	0	23.72	0	4.56	0	3.03	7.6998	-
TRINITY_DN9853_c0_g1_i2	1056	0	23.73	0	0.8	0	0.54	7.6998	tr|A0A0K9QK13|A0A0K9QK13_SPIOL Uncharacterized protein OS=Spinacia oleracea OX=3562 GN=SOVF_170240 PE=4 SV=1
TRINITY_DN986_c0_g1_i3	2297	0	23.61	0	0.33	0	0.22	7.6998	tr|A0A0K9QJJ5|A0A0K9QJJ5_SPIOL Uncharacterized protein OS=Spinacia oleracea OX=3562 GN=SOVF_177050 PE=4 SV=1
TRINITY_DN21630_c0_g1_i1	2654	1	202.71	0.01	2.43	0.01	1.61	7.69298	tr|E2DMZ5|E2DMZ5_BETVU Uncharacterized protein OS=Beta vulgaris OX=161934 PE=4 SV=1
TRINITY_DN11067_c0_g1_i3	2465	0	22.71	0	0.29	0	0.2	7.6387	tr|A0A0K9RNC2|A0A0K9RNC2_SPIOL Uncharacterized protein OS=Spinacia oleracea OX=3562 GN=SOVF_052330 PE=4 SV=1
TRINITY_DN11304_c1_g1_i2	1721	0	22.79	0	0.44	0	0.29	7.6387	tr|A0A0K9QRT2|A0A0K9QRT2_SPIOL Uncharacterized protein OS=Spinacia oleracea OX=3562 GN=SOVF_153940 PE=4 SV=1
TRINITY_DN11608_c0_g1_i5	2494	0	23.05	0	0.3	0	0.2	7.6387	tr|A0A0K9RGY3|A0A0K9RGY3_SPIOL Trehalose 6-phosphate phosphatase OS=Spinacia oleracea OX=3562 GN=SOVF_067850 PE=3 SV=1
TRINITY_DN11880_c2_g1_i1	567	0	22.9	0	1.77	0	1.18	7.6387	-
TRINITY_DN11947_c0_g1_i3	2268	0.04	22.55	0	0.32	0	0.21	7.6387	tr|A0A0K9QZF9|A0A0K9QZF9_SPIOL Uncharacterized protein OS=Spinacia oleracea OX=3562 GN=SOVF_124240 PE=4 SV=1
TRINITY_DN12283_c1_g1_i1	368	0	22.91	0	3.66	0	2.44	7.6387	-
TRINITY_DN13470_c0_g1_i4	576	0	23.02	0	1.74	0	1.16	7.6387	tr|A0A0J8CN31|A0A0J8CN31_BETVU Uncharacterized protein OS=Beta vulgaris subsp. vulgaris OX=3555 GN=BVRB_4g083540 PE=4 SV=1
TRINITY_DN1541_c0_g1_i10	2036	0	23.46	0	0.37	0	0.25	7.6387	tr|A0A0K9QTA1|A0A0K9QTA1_SPIOL Uncharacterized protein OS=Spinacia oleracea OX=3562 GN=SOVF_144150 PE=4 SV=1
TRINITY_DN1541_c0_g1_i5	2813	0	23.22	0	0.26	0	0.17	7.6387	tr|A0A0K9QTA1|A0A0K9QTA1_SPIOL Uncharacterized protein OS=Spinacia oleracea OX=3562 GN=SOVF_144150 PE=4 SV=1
TRINITY_DN1579_c0_g1_i5	3181	0	22.87	0	0.23	0	0.15	7.6387	tr|A0A0K9QQG3|A0A0K9QQG3_SPIOL Uncharacterized protein (Fragment) OS=Spinacia oleracea OX=3562 GN=SOVF_152910 PE=3 SV=1
TRINITY_DN16036_c0_g1_i1	222	0	23	0	13.05	0	8.68	7.6387	-
TRINITY_DN1632_c0_g1_i5	5500	0	22.68	0	0.13	0	0.08	7.6387	tr|A0A0K9RDI5|A0A0K9RDI5_SPIOL Uncharacterized protein OS=Spinacia oleracea OX=3562 GN=SOVF_078260 PE=4 SV=1
TRINITY_DN1678_c2_g1_i5	774	0	23.35	0	1.17	0	0.78	7.6387	-
TRINITY_DN16946_c0_g1_i3	1942	0	23.43	0	0.39	0	0.26	7.6387	tr|A0A0K9RR85|A0A0K9RR85_SPIOL Uncharacterized protein OS=Spinacia oleracea OX=3562 GN=SOVF_037670 PE=4 SV=1
TRINITY_DN16948_c0_g2_i12	1107	0	23.48	0	0.75	0	0.5	7.6387	tr|A0A0K9Q964|A0A0K9Q964_SPIOL Uncharacterized protein OS=Spinacia oleracea OX=3562 GN=SOVF_205780 PE=4 SV=1
TRINITY_DN17008_c0_g1_i5	248	0	23	0	9.28	0	6.18	7.6387	-
TRINITY_DN17165_c0_g1_i4	1237	0	23.47	0	0.66	0	0.44	7.6387	tr|A0A0K9QYX6|A0A0K9QYX6_SPIOL Uncharacterized protein OS=Spinacia oleracea OX=3562 GN=SOVF_125620 PE=4 SV=1
TRINITY_DN17295_c0_g1_i1	809	0	23	0	1.09	0	0.72	7.6387	-
TRINITY_DN18764_c0_g1_i2	336	0.13	23.2	0.02	4.45	0.02	2.96	7.6387	-
TRINITY_DN190_c0_g1_i16	4109	0	22.97	0	0.17	0	0.12	7.6387	tr|A0A0K9REJ8|A0A0K9REJ8_SPIOL Uncharacterized protein (Fragment) OS=Spinacia oleracea OX=3562 GN=SOVF_080420 PE=3 SV=1
TRINITY_DN23578_c0_g1_i1	1686	0	22.63	0	0.45	0	0.3	7.6387	tr|A0A0K9QNZ2|A0A0K9QNZ2_SPIOL Uncharacterized protein (Fragment) OS=Spinacia oleracea OX=3562 GN=SOVF_163820 PE=4 SV=1
TRINITY_DN25912_c0_g1_i14	2740	0	23.31	0	0.27	0	0.18	7.6387	tr|A0A0K9QWQ3|A0A0K9QWQ3_SPIOL Uncharacterized protein OS=Spinacia oleracea OX=3562 GN=SOVF_139460 PE=3 SV=1
TRINITY_DN25915_c0_g1_i1	1386	0	23.37	0	0.57	0	0.38	7.6387	tr|A0A0K9RSS8|A0A0K9RSS8_SPIOL Transmembrane 9 superfamily member OS=Spinacia oleracea OX=3562 GN=SOVF_033460 PE=3 SV=1
TRINITY_DN2677_c0_g1_i9	774	0	22.8	0	1.14	0	0.76	7.6387	tr|A0A0K9RJF3|A0A0K9RJF3_SPIOL Nuclear cap-binding protein subunit 2 OS=Spinacia oleracea OX=3562 GN=SOVF_060000 PE=3 SV=1
TRINITY_DN3146_c0_g1_i4	828	0	23.23	0	1.07	0	0.71	7.6387	tr|A0A1B1RVA0|A0A1B1RVA0_AMATR Transcription factor MYB1 OS=Amaranthus tricolor OX=29722 PE=2 SV=1
TRINITY_DN316_c0_g1_i6	1140	0	22.66	0	0.7	0	0.47	7.6387	tr|A0A0K9RUF1|A0A0K9RUF1_SPIOL Uncharacterized protein OS=Spinacia oleracea OX=3562 GN=SOVF_033400 PE=4 SV=1
TRINITY_DN3805_c0_g1_i8	3713	0	23.06	0	0.19	0	0.13	7.6387	tr|A0A0K9QUU0|A0A0K9QUU0_SPIOL Uncharacterized protein OS=Spinacia oleracea OX=3562 GN=SOVF_146140 PE=4 SV=1
TRINITY_DN420_c1_g1_i5	1628	0	22.85	0	0.47	0	0.31	7.6387	tr|A0A0K9QF25|A0A0K9QF25_SPIOL Uncharacterized protein OS=Spinacia oleracea OX=3562 GN=SOVF_186410 PE=4 SV=1
TRINITY_DN4246_c0_g1_i9	3051	0	23.46	0	0.24	0	0.16	7.6387	tr|A0A0K9QM99|A0A0K9QM99_SPIOL Uncharacterized protein OS=Spinacia oleracea OX=3562 GN=SOVF_162900 PE=4 SV=1
TRINITY_DN4262_c1_g1_i18	2524	0	23.02	0	0.29	0	0.19	7.6387	tr|A0A0K9QGC3|A0A0K9QGC3_SPIOL Uncharacterized protein OS=Spinacia oleracea OX=3562 GN=SOVF_187770 PE=4 SV=1
TRINITY_DN4470_c0_g2_i4	953	0	22.86	0	0.88	0	0.58	7.6387	tr|A0A0K9R7U9|A0A0K9R7U9_SPIOL Uncharacterized protein OS=Spinacia oleracea OX=3562 GN=SOVF_103590 PE=4 SV=1
TRINITY_DN4558_c2_g2_i2	1271	0	22.57	0	0.61	0	0.41	7.6387	tr|A0A0K9QNR7|A0A0K9QNR7_SPIOL Beta-hexosaminidase OS=Spinacia oleracea OX=3562 GN=SOVF_158670 PE=3 SV=1
TRINITY_DN4636_c0_g1_i1	530	0	22.71	0	1.94	0	1.29	7.6387	-
TRINITY_DN4822_c1_g1_i13	2283	0	23.1	0	0.33	0	0.22	7.6387	tr|A0A0K9RN18|A0A0K9RN18_SPIOL Uncharacterized protein OS=Spinacia oleracea OX=3562 GN=SOVF_048350 PE=4 SV=1
TRINITY_DN4825_c0_g2_i5	1321	0	22.51	0	0.59	0	0.39	7.6387	tr|A0A0J8CGG5|A0A0J8CGG5_BETVU Uncharacterized protein OS=Beta vulgaris subsp. vulgaris OX=3555 GN=BVRB_4g090870 PE=4 SV=1
TRINITY_DN5002_c0_g1_i1	4154	0	23.04	0	0.17	0	0.11	7.6387	tr|A0A0K9QRT6|A0A0K9QRT6_SPIOL Uncharacterized protein OS=Spinacia oleracea OX=3562 GN=SOVF_155490 PE=4 SV=1
TRINITY_DN5138_c0_g1_i24	3800	0	22.65	0	0.19	0	0.12	7.6387	tr|A0A0K9RNP1|A0A0K9RNP1_SPIOL Uncharacterized protein OS=Spinacia oleracea OX=3562 GN=SOVF_051490 PE=3 SV=1
TRINITY_DN5285_c0_g2_i3	590	0	23	0	1.68	0	1.11	7.6387	-
TRINITY_DN5448_c0_g1_i3	2826	0	22.99	0	0.26	0	0.17	7.6387	tr|A0A0K9RE29|A0A0K9RE29_SPIOL Uncharacterized protein (Fragment) OS=Spinacia oleracea OX=3562 GN=SOVF_077200 PE=4 SV=1
TRINITY_DN5497_c1_g1_i13	780	0	22.85	0	1.13	0	0.75	7.6387	tr|A0A0K9QDC4|A0A0K9QDC4_SPIOL Uncharacterized protein (Fragment) OS=Spinacia oleracea OX=3562 GN=SOVF_192000 PE=4 SV=1
TRINITY_DN5497_c1_g1_i2	997	0	22.74	0	0.83	0	0.55	7.6387	-
TRINITY_DN5965_c0_g1_i14	2000	0	22.56	0	0.37	0	0.24	7.6387	tr|A0A0K9R7D9|A0A0K9R7D9_SPIOL Uncharacterized protein OS=Spinacia oleracea OX=3562 GN=SOVF_102900 PE=4 SV=1
TRINITY_DN6167_c0_g1_i1	2699	0	23.27	0	0.27	0	0.18	7.6387	tr|A0A0J8B3H7|A0A0J8B3H7_BETVU Uncharacterized protein OS=Beta vulgaris subsp. vulgaris OX=3555 GN=BVRB_007430 PE=4 SV=1
TRINITY_DN6233_c0_g2_i2	2995	0	23.28	0	0.24	0	0.16	7.6387	tr|A0A0K9RHN5|A0A0K9RHN5_SPIOL Uncharacterized protein OS=Spinacia oleracea OX=3562 GN=SOVF_071460 PE=3 SV=1
TRINITY_DN6257_c1_g1_i2	3553	0	23.2	0	0.2	0	0.14	7.6387	tr|A0A0K9Q6K8|A0A0K9Q6K8_SPIOL Uncharacterized protein (Fragment) OS=Spinacia oleracea OX=3562 GN=SOVF_216560 PE=4 SV=1
TRINITY_DN6478_c0_g1_i7	1219	0	23.07	0	0.66	0	0.44	7.6387	tr|A0A0K9RMV8|A0A0K9RMV8_SPIOL Thymidine kinase OS=Spinacia oleracea OX=3562 GN=SOVF_054150 PE=3 SV=1
TRINITY_DN7485_c0_g1_i20	1565	0	22.51	0	0.48	0	0.32	7.6387	tr|A0A0K9RY23|A0A0K9RY23_SPIOL Uncharacterized protein OS=Spinacia oleracea OX=3562 GN=SOVF_016570 PE=3 SV=1
TRINITY_DN7618_c0_g1_i23	2566	0	22.72	0	0.28	0	0.19	7.6387	tr|A0A1B3TNU9|A0A1B3TNU9_MIRJA Integrase OS=Mirabilis jalapa OX=3538 PE=4 SV=1
TRINITY_DN7676_c0_g1_i2	722	0	23	0	1.26	0	0.84	7.6387	-
TRINITY_DN8001_c0_g1_i1	357	0	23	0	3.9	0	2.6	7.6387	tr|E7BQD4|E7BQD4_SILLA Gag-pol polyprotein OS=Silene latifolia OX=37657 PE=4 SV=1
TRINITY_DN83135_c0_g1_i1	313	0	23	0	5.15	0	3.43	7.6387	tr|A0A0K9RQ05|A0A0K9RQ05_SPIOL Uncharacterized protein OS=Spinacia oleracea OX=3562 GN=SOVF_047400 PE=4 SV=1
TRINITY_DN8952_c0_g1_i1	3762	0	23.3	0	0.19	0	0.13	7.6387	tr|Q3I6J4|Q3I6J4_SILLA Pol-polyprotein OS=Silene latifolia OX=37657 GN=pol PE=4 SV=1
TRINITY_DN9044_c0_g2_i5	2316	0	22.55	0	0.31	0	0.21	7.6387	tr|A0A0K9RKX5|A0A0K9RKX5_SPIOL Uncharacterized protein OS=Spinacia oleracea OX=3562 GN=SOVF_055140 PE=4 SV=1
TRINITY_DN9207_c0_g1_i7	406	0	23.2	0	3.08	0	2.05	7.6387	-
TRINITY_DN9289_c0_g1_i2	2259	0	22.77	0	0.32	0	0.22	7.6387	tr|A0A0K9RFR1|A0A0K9RFR1_SPIOL Uncharacterized protein OS=Spinacia oleracea OX=3562 GN=SOVF_071800 PE=4 SV=1
TRINITY_DN1017_c1_g1_i2	288	0	22.25	0	6.05	0	4.03	7.5749	-
TRINITY_DN10429_c0_g2_i1	707	0	21.52	0	1.22	0	0.81	7.5749	-
TRINITY_DN10434_c0_g2_i1	1315	0	21.52	0	0.56	0	0.37	7.5749	tr|J3SIC5|J3SIC5_BETVU Calmcium/calmodulin-dependent protein kinase CDPK2 OS=Beta vulgaris subsp. vulgaris OX=3555 PE=3 SV=1
TRINITY_DN1084_c0_g1_i1	3373	0	21.54	0	0.2	0	0.13	7.5749	tr|A0A0K9RGT0|A0A0K9RGT0_SPIOL Potassium transporter OS=Spinacia oleracea OX=3562 GN=SOVF_068520 PE=3 SV=1
TRINITY_DN11264_c0_g1_i11	378	0	22	0	3.34	0	2.22	7.5749	-
TRINITY_DN11391_c0_g1_i7	2208	0	21.64	0	0.32	0	0.21	7.5749	tr|A0A0K9QKK3|A0A0K9QKK3_SPIOL Uncharacterized protein OS=Spinacia oleracea OX=3562 GN=SOVF_168380 PE=4 SV=1
TRINITY_DN1240_c3_g1_i1	518	0	22	0	1.95	0	1.3	7.5749	-
TRINITY_DN12891_c0_g1_i1	2299	0	21.8	0	0.3	0	0.2	7.5749	tr|A0A0K9QR10|A0A0K9QR10_SPIOL Uncharacterized protein OS=Spinacia oleracea OX=3562 GN=SOVF_156310 PE=3 SV=1
TRINITY_DN1326_c0_g1_i25	2559	0	22.01	0	0.27	0	0.18	7.5749	tr|A0A0K9RQU7|A0A0K9RQU7_SPIOL Uncharacterized protein OS=Spinacia oleracea OX=3562 GN=SOVF_038980 PE=4 SV=1
TRINITY_DN13790_c0_g1_i1	418	0	22.06	0	2.78	0	1.85	7.5749	tr|A0A0J8BD69|A0A0J8BD69_BETVU Uncharacterized protein OS=Beta vulgaris subsp. vulgaris OX=3555 GN=BVRB_2g046180 PE=4 SV=1
TRINITY_DN14256_c0_g1_i4	665	0	21.64	0	1.33	0	0.89	7.5749	tr|E7BQD4|E7BQD4_SILLA Gag-pol polyprotein OS=Silene latifolia OX=37657 PE=4 SV=1
TRINITY_DN14586_c0_g1_i3	1655	0	22.36	0	0.45	0	0.3	7.5749	tr|A0A0K9QL64|A0A0K9QL64_SPIOL Uncharacterized protein OS=Spinacia oleracea OX=3562 GN=SOVF_172290 PE=4 SV=1
TRINITY_DN16797_c2_g1_i3	1470	0	22.14	0	0.51	0	0.34	7.5749	tr|A0A0K9RLK6|A0A0K9RLK6_SPIOL Uncharacterized protein OS=Spinacia oleracea OX=3562 GN=SOVF_058250 PE=4 SV=1
TRINITY_DN18986_c0_g1_i3	476	0	21.5	0	2.18	0	1.45	7.5749	-
TRINITY_DN21272_c0_g1_i2	325	0	22	0	4.54	0	3.02	7.5749	-
TRINITY_DN22352_c0_g2_i1	544	0	22	0	1.81	0	1.2	7.5749	-
TRINITY_DN2302_c0_g1_i13	3089	0	22.41	0	0.23	0	0.15	7.5749	tr|A0A0K9RDR4|A0A0K9RDR4_SPIOL Uncharacterized protein OS=Spinacia oleracea OX=3562 GN=SOVF_077690 PE=4 SV=1
TRINITY_DN254_c0_g2_i7	1414	0	21.78	0	0.52	0	0.35	7.5749	tr|A0A0K9R3W5|A0A0K9R3W5_SPIOL Uncharacterized protein OS=Spinacia oleracea OX=3562 GN=SOVF_109690 PE=4 SV=1
TRINITY_DN2687_c0_g1_i14	2447	0	22.2	0	0.29	0	0.19	7.5749	tr|A0A0J8BA70|A0A0J8BA70_BETVU Uncharacterized protein OS=Beta vulgaris subsp. vulgaris OX=3555 GN=BVRB_8g199800 PE=4 SV=1
TRINITY_DN2721_c0_g1_i1	2799	0.09	21.53	0	0.24	0	0.16	7.5749	tr|A0A0K9QXH3|A0A0K9QXH3_SPIOL Uncharacterized protein OS=Spinacia oleracea OX=3562 GN=SOVF_135440 PE=4 SV=1
TRINITY_DN3059_c0_g1_i5	1108	0	22.44	0	0.72	0	0.48	7.5749	tr|A0A0J8B993|A0A0J8B993_BETVU Uncharacterized protein OS=Beta vulgaris subsp. vulgaris OX=3555 GN=BVRB_8g202090 PE=4 SV=1
TRINITY_DN3093_c0_g2_i13	2258	0	21.6	0	0.31	0	0.2	7.5749	-
TRINITY_DN3152_c0_g1_i1	3806	0	21.51	0	0.18	0	0.12	7.5749	tr|A0A0K9R5X9|A0A0K9R5X9_SPIOL Acetyl-coenzyme A synthetase OS=Spinacia oleracea OX=3562 GN=SOVF_108190 PE=3 SV=1
TRINITY_DN3717_c0_g1_i6	1359	0	22.08	0	0.56	0	0.37	7.5749	-
TRINITY_DN3743_c0_g1_i1	1276	0	21.67	0	0.59	0	0.39	7.5749	tr|A0A0K9RRI8|A0A0K9RRI8_SPIOL Uncharacterized protein OS=Spinacia oleracea OX=3562 GN=SOVF_036690 PE=4 SV=1
TRINITY_DN406_c1_g1_i5	2114	0	22.38	0	0.34	0	0.23	7.5749	tr|A0A0K9QXM6|A0A0K9QXM6_SPIOL Uncharacterized protein OS=Spinacia oleracea OX=3562 GN=SOVF_129740 PE=4 SV=1
TRINITY_DN4086_c0_g1_i13	4079	0	21.6	0	0.16	0	0.11	7.5749	tr|A0A0K9RHJ8|A0A0K9RHJ8_SPIOL Uncharacterized protein OS=Spinacia oleracea OX=3562 GN=SOVF_070720 PE=4 SV=1
TRINITY_DN4144_c0_g1_i1	506	0	21.52	0	1.98	0	1.32	7.5749	-
TRINITY_DN4524_c1_g2_i1	1181	0	22	0	0.65	0	0.43	7.5749	-
TRINITY_DN4668_c0_g1_i1	928	0	21.51	0	0.85	0	0.57	7.5749	tr|A0A0K9RNN6|A0A0K9RNN6_SPIOL Uncharacterized protein OS=Spinacia oleracea OX=3562 GN=SOVF_051630 PE=3 SV=1
TRINITY_DN4907_c0_g1_i5	1994	0	22.12	0	0.36	0	0.24	7.5749	tr|A0A0K9R2P3|A0A0K9R2P3_SPIOL Uncharacterized protein OS=Spinacia oleracea OX=3562 GN=SOVF_113730 PE=4 SV=1
TRINITY_DN4927_c0_g5_i2	2437	0.13	21.63	0	0.28	0	0.19	7.5749	tr|A0A0K9R7B4|A0A0K9R7B4_SPIOL Uncharacterized protein OS=Spinacia oleracea OX=3562 GN=SOVF_103400 PE=4 SV=1
TRINITY_DN495_c0_g1_i36	4968	0	22.22	0	0.14	0	0.09	7.5749	tr|A0A0K9QRY5|A0A0K9QRY5_SPIOL Uncharacterized protein OS=Spinacia oleracea OX=3562 GN=SOVF_153470 PE=4 SV=1
TRINITY_DN5033_c0_g1_i15	1956	0	21.57	0	0.36	0	0.24	7.5749	tr|A0A0K9QP60|A0A0K9QP60_SPIOL Uncharacterized protein OS=Spinacia oleracea OX=3562 GN=SOVF_163330 PE=4 SV=1
TRINITY_DN5362_c0_g1_i6	447	0	21.8	0	2.45	0	1.63	7.5749	-
TRINITY_DN6072_c0_g1_i12	1243	0	22.09	0	0.62	0	0.41	7.5749	tr|A0A0K9Q8W3|A0A0K9Q8W3_SPIOL Uncharacterized protein OS=Spinacia oleracea OX=3562 GN=SOVF_212140 PE=4 SV=1
TRINITY_DN622_c1_g2_i1	2025	0	21.95	0	0.35	0	0.23	7.5749	tr|A0A0K9QRF2|A0A0K9QRF2_SPIOL Tubby-like F-box protein OS=Spinacia oleracea OX=3562 GN=SOVF_149710 PE=3 SV=1
TRINITY_DN641_c0_g1_i13	4000	0	22.05	0	0.17	0	0.11	7.5749	tr|A0A0K9R3K7|A0A0K9R3K7_SPIOL Uncharacterized protein OS=Spinacia oleracea OX=3562 GN=SOVF_110860 PE=4 SV=1
TRINITY_DN6447_c0_g1_i3	2185	0	22.18	0	0.33	0	0.22	7.5749	tr|A0A0K9RVK7|A0A0K9RVK7_SPIOL Uncharacterized protein OS=Spinacia oleracea OX=3562 GN=SOVF_029810 PE=3 SV=1
TRINITY_DN6609_c1_g3_i1	3405	0	22.11	0	0.2	0	0.14	7.5749	tr|A0A0J8DXQ5|A0A0J8DXQ5_BETVU Uncharacterized protein OS=Beta vulgaris subsp. vulgaris OX=3555 GN=BVRB_006300 PE=4 SV=1
TRINITY_DN6682_c0_g1_i1	2656	0	21.69	0	0.26	0	0.17	7.5749	tr|A0A0K9R459|A0A0K9R459_SPIOL Uncharacterized protein OS=Spinacia oleracea OX=3562 GN=SOVF_108850 PE=3 SV=1
TRINITY_DN68986_c0_g1_i1	583	0	22	0	1.63	0	1.09	7.5749	-
TRINITY_DN708_c0_g1_i8	4017	0	21.56	0	0.17	0	0.11	7.5749	tr|A0A0K9R9A5|A0A0K9R9A5_SPIOL Uncharacterized protein OS=Spinacia oleracea OX=3562 GN=SOVF_099070 PE=4 SV=1
TRINITY_DN744_c0_g1_i13	2686	0	22.27	0	0.26	0	0.18	7.5749	tr|A0A0K9QZE6|A0A0K9QZE6_SPIOL Uncharacterized protein OS=Spinacia oleracea OX=3562 GN=SOVF_129140 PE=3 SV=1
TRINITY_DN8343_c3_g2_i1	869	0	22	0	0.95	0	0.63	7.5749	-
TRINITY_DN849_c0_g1_i14	1583	0.01	21.85	0	0.46	0	0.31	7.5749	tr|A0A0K9RBA8|A0A0K9RBA8_SPIOL Uncharacterized protein OS=Spinacia oleracea OX=3562 GN=SOVF_092540 PE=4 SV=1
TRINITY_DN94455_c0_g1_i1	1235	0	22	0	0.62	0	0.41	7.5749	tr|A0A1B3TNU5|A0A1B3TNU5_MIRJA RNaseH OS=Mirabilis jalapa OX=3538 PE=4 SV=1
TRINITY_DN9697_c0_g1_i2	849	0	21.84	0	0.97	0	0.65	7.5749	-
TRINITY_DN9892_c0_g1_i2	484	0	22.21	0	2.19	0	1.46	7.5749	tr|A0A0K9QIP5|A0A0K9QIP5_SPIOL Serine/threonine-protein phosphatase OS=Spinacia oleracea OX=3562 GN=SOVF_174900 PE=3 SV=1
TRINITY_DN10223_c0_g1_i6	2441	0	20.85	0	0.27	0	0.18	7.50815	-
TRINITY_DN10311_c0_g1_i2	958	0	21	0	0.8	0	0.53	7.50815	-
TRINITY_DN10955_c0_g1_i7	664	0	21.18	0	1.3	0	0.87	7.50815	tr|A2I5E5|A2I5E5_BETVU Retrotransposon protein OS=Beta vulgaris OX=161934 PE=4 SV=1
TRINITY_DN11196_c0_g1_i25	9078	0	20.75	0	0.07	0	0.05	7.50815	tr|A0A0J8B352|A0A0J8B352_BETVU Uncharacterized protein OS=Beta vulgaris subsp. vulgaris OX=3555 GN=BVRB_008340 PE=4 SV=1
TRINITY_DN11518_c0_g1_i2	552	0	20.65	0	1.66	0	1.1	7.50815	-
TRINITY_DN11583_c1_g2_i2	849	0	21	0	0.93	0	0.62	7.50815	-
TRINITY_DN115_c1_g1_i11	2061	0	21.41	0	0.34	0	0.22	7.50815	tr|K4Q1D7|K4Q1D7_BETVU Uncharacterized protein OS=Beta vulgaris OX=161934 PE=4 SV=1
TRINITY_DN1286_c0_g1_i3	1403	0.23	21.05	0.01	0.51	0	0.34	7.50815	tr|A0A0K9R385|A0A0K9R385_SPIOL Uncharacterized protein OS=Spinacia oleracea OX=3562 GN=SOVF_111690 PE=4 SV=1
TRINITY_DN12924_c0_g1_i1	373	0	21.16	0	3.29	0	2.19	7.50815	tr|A0A0J8B7C3|A0A0J8B7C3_BETVU Uncharacterized protein OS=Beta vulgaris subsp. vulgaris OX=3555 GN=BVRB_005900 PE=4 SV=1
TRINITY_DN1420_c0_g1_i8	2961	0	21.14	0	0.23	0	0.15	7.50815	tr|A0A0K9Q940|A0A0K9Q940_SPIOL Uncharacterized protein OS=Spinacia oleracea OX=3562 GN=SOVF_205650 PE=3 SV=1
TRINITY_DN14386_c0_g1_i15	1592	0	20.65	0	0.43	0	0.29	7.50815	tr|A0A0K9RW03|A0A0K9RW03_SPIOL Terpene cyclase/mutase family member OS=Spinacia oleracea OX=3562 GN=SOVF_022560 PE=3 SV=1
TRINITY_DN16786_c0_g1_i4	2633	0	21.46	0	0.26	0	0.17	7.50815	tr|A0A0K9QPH1|A0A0K9QPH1_SPIOL Uncharacterized protein (Fragment) OS=Spinacia oleracea OX=3562 GN=SOVF_156280 PE=4 SV=1
TRINITY_DN1704_c0_g1_i12	2751	0	21.14	0	0.24	0	0.16	7.50815	tr|A0A0K9Q9E4|A0A0K9Q9E4_SPIOL Uncharacterized protein OS=Spinacia oleracea OX=3562 GN=SOVF_204100 PE=4 SV=1
TRINITY_DN17119_c0_g1_i11	3058	0.19	20.52	0	0.21	0	0.14	7.50815	tr|A0A0K9RDS6|A0A0K9RDS6_SPIOL WAT1-related protein OS=Spinacia oleracea OX=3562 GN=SOVF_077790 PE=3 SV=1
TRINITY_DN1729_c0_g1_i8	1719	0	20.67	0	0.4	0	0.26	7.50815	tr|A0A0K9R4E8|A0A0K9R4E8_SPIOL Uncharacterized protein OS=Spinacia oleracea OX=3562 GN=SOVF_113280 PE=4 SV=1
TRINITY_DN17755_c0_g1_i2	1620	0	21.02	0	0.43	0	0.29	7.50815	tr|J3S7K7|J3S7K7_BETVU Mariner transposase OS=Beta vulgaris subsp. vulgaris OX=3555 PE=4 SV=1
TRINITY_DN18975_c0_g1_i1	232	0	21	0	10.35	0	6.88	7.50815	-
TRINITY_DN19080_c0_g1_i3	2224	0	21.38	0	0.31	0	0.21	7.50815	tr|E2DMY8|E2DMY8_BETVU Uncharacterized protein OS=Beta vulgaris OX=161934 PE=4 SV=1
TRINITY_DN1937_c0_g1_i7	1337	0	21.08	0	0.54	0	0.36	7.50815	tr|A0A0K9R0W6|A0A0K9R0W6_SPIOL Trehalose 6-phosphate phosphatase OS=Spinacia oleracea OX=3562 GN=SOVF_124510 PE=3 SV=1
TRINITY_DN2149_c0_g1_i32	2816	0	21.06	0	0.24	0	0.16	7.50815	tr|A0A0K9RFE8|A0A0K9RFE8_SPIOL Uncharacterized protein OS=Spinacia oleracea OX=3562 GN=SOVF_073040 PE=4 SV=1
TRINITY_DN21576_c0_g2_i1	646	0	21	0	1.34	0	0.89	7.50815	-
TRINITY_DN21841_c0_g2_i1	253	0	21	0	8.01	0	5.33	7.50815	-
TRINITY_DN27402_c0_g2_i3	741	0	21.11	0	1.12	0	0.75	7.50815	-
TRINITY_DN288_c0_g1_i1	1618	0	20.75	0	0.43	0	0.28	7.50815	tr|A0A0K9R208|A0A0K9R208_SPIOL Uncharacterized protein OS=Spinacia oleracea OX=3562 GN=SOVF_115710 PE=4 SV=1
TRINITY_DN3009_c0_g1_i12	3561	0	20.86	0	0.18	0	0.12	7.50815	tr|A0A0K9R0Z2|A0A0K9R0Z2_SPIOL Uncharacterized protein OS=Spinacia oleracea OX=3562 GN=SOVF_118940 PE=4 SV=1
TRINITY_DN302_c0_g1_i21	2594	0.06	21.14	0	0.26	0	0.17	7.50815	tr|A0A0K9RL19|A0A0K9RL19_SPIOL Uncharacterized protein OS=Spinacia oleracea OX=3562 GN=SOVF_054710 PE=4 SV=1
TRINITY_DN3279_c0_g1_i4	2380	0	21.04	0	0.28	0	0.19	7.50815	tr|A0A0K9RH09|A0A0K9RH09_SPIOL Uncharacterized protein OS=Spinacia oleracea OX=3562 GN=SOVF_067640 PE=3 SV=1
TRINITY_DN332_c3_g2_i1	227	0	20.99	0	11.08	0	7.37	7.50815	tr|A2I5F8|A2I5F8_BETVU Integrase OS=Beta vulgaris OX=161934 PE=4 SV=1
TRINITY_DN336_c1_g1_i5	986	0	21.01	0	0.77	0	0.52	7.50815	tr|A0A0K9QCU9|A0A0K9QCU9_SPIOL Uncharacterized protein OS=Spinacia oleracea OX=3562 GN=SOVF_200470 PE=4 SV=1
TRINITY_DN3418_c0_g1_i10	1645	0	20.63	0	0.42	0	0.28	7.50815	tr|A0A0K9R9A1|A0A0K9R9A1_SPIOL Uncharacterized protein OS=Spinacia oleracea OX=3562 GN=SOVF_099040 PE=4 SV=1
TRINITY_DN3711_c0_g3_i1	2108	0	21.21	0	0.33	0	0.22	7.50815	tr|A0A0K9QYU0|A0A0K9QYU0_SPIOL Uncharacterized protein OS=Spinacia oleracea OX=3562 GN=SOVF_131140 PE=4 SV=1
TRINITY_DN4223_c0_g4_i4	1268	0	21.2	0	0.58	0	0.38	7.50815	tr|A0A0J8FJ13|A0A0J8FJ13_BETVU Uncharacterized protein OS=Beta vulgaris subsp. vulgaris OX=3555 GN=BVRB_3g055590 PE=4 SV=1
TRINITY_DN4241_c0_g2_i17	3453	0	21.43	0	0.19	0	0.13	7.50815	tr|A0A0K9R226|A0A0K9R226_SPIOL Uncharacterized protein OS=Spinacia oleracea OX=3562 GN=SOVF_115440 PE=3 SV=1
TRINITY_DN4331_c0_g1_i13	1268	0	20.7	0	0.56	0	0.38	7.50815	tr|A0A0K9RHT0|A0A0K9RHT0_SPIOL Uncharacterized protein OS=Spinacia oleracea OX=3562 GN=SOVF_065160 PE=4 SV=1
TRINITY_DN4352_c0_g1_i3	1479	0	20.93	0	0.48	0	0.32	7.50815	tr|A0A0K9QGN6|A0A0K9QGN6_SPIOL Uncharacterized protein OS=Spinacia oleracea OX=3562 GN=SOVF_186200 PE=4 SV=1
TRINITY_DN4362_c0_g1_i5	385	0	20.62	0	3.02	0	2.01	7.50815	tr|A0A0K9QKR5|A0A0K9QKR5_SPIOL Uncharacterized protein OS=Spinacia oleracea OX=3562 GN=SOVF_168200 PE=4 SV=1
TRINITY_DN4494_c0_g1_i6	467	0	20.94	0	2.19	0	1.46	7.50815	tr|A0A0K9RA48|A0A0K9RA48_SPIOL Uncharacterized protein OS=Spinacia oleracea OX=3562 GN=SOVF_089560 PE=4 SV=1
TRINITY_DN4822_c1_g1_i15	2215	0	20.86	0	0.3	0	0.2	7.50815	tr|A0A0K9RN18|A0A0K9RN18_SPIOL Uncharacterized protein OS=Spinacia oleracea OX=3562 GN=SOVF_048350 PE=4 SV=1
TRINITY_DN4879_c0_g2_i6	1021	0	21.24	0	0.75	0	0.5	7.50815	tr|A0A0K9R421|A0A0K9R421_SPIOL Uncharacterized protein OS=Spinacia oleracea OX=3562 GN=SOVF_109270 PE=3 SV=1
TRINITY_DN5059_c0_g1_i8	1850	0	21.44	0	0.38	0	0.25	7.50815	tr|A0A0J8BBV9|A0A0J8BBV9_BETVU Uncharacterized protein OS=Beta vulgaris subsp. vulgaris OX=3555 GN=BVRB_5g127170 PE=4 SV=1
TRINITY_DN5116_c0_g1_i1	326	0	21	0	4.3	0	2.86	7.50815	-
TRINITY_DN5812_c0_g1_i14	1649	0	20.72	0	0.42	0	0.28	7.50815	tr|A0A0K9RU54|A0A0K9RU54_SPIOL Uncharacterized protein OS=Spinacia oleracea OX=3562 GN=SOVF_035020 PE=4 SV=1
TRINITY_DN5820_c0_g1_i7	1682	0	21.11	0	0.42	0	0.28	7.50815	tr|A0A0K9RIK5|A0A0K9RIK5_SPIOL Uncharacterized protein OS=Spinacia oleracea OX=3562 GN=SOVF_062970 PE=3 SV=1
TRINITY_DN5904_c0_g1_i5	1436	0	21.34	0	0.5	0	0.34	7.50815	tr|A0A0K9QIX0|A0A0K9QIX0_SPIOL Uncharacterized protein OS=Spinacia oleracea OX=3562 GN=SOVF_180170 PE=4 SV=1
TRINITY_DN5965_c1_g1_i3	2511	0	21.04	0	0.27	0	0.18	7.50815	tr|A0A0K9R5V7|A0A0K9R5V7_SPIOL Uncharacterized protein OS=Spinacia oleracea OX=3562 GN=SOVF_103030 PE=4 SV=1
TRINITY_DN615_c0_g1_i5	2064	0	20.83	0	0.33	0	0.22	7.50815	tr|A0A0J8B7E7|A0A0J8B7E7_BETVU Uncharacterized protein OS=Beta vulgaris subsp. vulgaris OX=3555 GN=BVRB_004110 PE=4 SV=1
TRINITY_DN61966_c0_g1_i1	399	0	21	0	2.88	0	1.92	7.50815	-
TRINITY_DN6281_c0_g1_i3	1198	0	20.91	0	0.61	0	0.41	7.50815	tr|A0A0K9RGK1|A0A0K9RGK1_SPIOL Uncharacterized protein OS=Spinacia oleracea OX=3562 GN=SOVF_069120 PE=3 SV=1
TRINITY_DN6599_c0_g1_i8	2418	0	21.27	0	0.28	0	0.19	7.50815	tr|A0A0K9R3D7|A0A0K9R3D7_SPIOL Uncharacterized protein OS=Spinacia oleracea OX=3562 GN=SOVF_109650 PE=4 SV=1
TRINITY_DN7103_c0_g1_i3	1431	0	21.18	0	0.5	0	0.33	7.50815	-
TRINITY_DN7660_c0_g1_i1	551	0	21.39	0	1.72	0	1.15	7.50815	tr|A0A0K9R3W0|A0A0K9R3W0_SPIOL Uncharacterized protein OS=Spinacia oleracea OX=3562 GN=SOVF_109800 PE=3 SV=1
TRINITY_DN78977_c0_g1_i1	495	0	21	0	2	0	1.33	7.50815	-
TRINITY_DN8450_c1_g1_i19	1386	0	20.9	0	0.51	0	0.34	7.50815	-
TRINITY_DN9017_c0_g2_i2	2166	0	20.99	0	0.31	0	0.21	7.50815	tr|A0A0K9RL79|A0A0K9RL79_SPIOL Uncharacterized protein OS=Spinacia oleracea OX=3562 GN=SOVF_054200 PE=3 SV=1
TRINITY_DN78494_c0_g1_i1	1434	7	1103	0.16	26.09	0.11	17.36	7.48091	tr|A0A0K9QBI9|A0A0K9QBI9_SPIOL Uncharacterized protein OS=Spinacia oleracea OX=3562 GN=SOVF_197980 PE=4 SV=1
TRINITY_DN1375_c1_g1_i14	2423	1.26	172.61	0.02	2.28	0.01	1.52	7.46242	tr|A0A0K9RJP8|A0A0K9RJP8_SPIOL Uncharacterized protein OS=Spinacia oleracea OX=3562 GN=SOVF_058950 PE=4 SV=1
TRINITY_DN10449_c0_g1_i2	2104	0	19.63	0	0.3	0	0.2	7.43815	-
TRINITY_DN11247_c0_g1_i1	360	0	20.28	0	3.38	0	2.25	7.43815	-
TRINITY_DN11369_c0_g1_i1	477	0	20	0	2.02	0	1.34	7.43815	-
TRINITY_DN11544_c0_g1_i2	2923	0	19.88	0	0.21	0	0.14	7.43815	tr|A0A0K9QP81|A0A0K9QP81_SPIOL Uncharacterized protein OS=Spinacia oleracea OX=3562 GN=SOVF_162060 PE=4 SV=1
TRINITY_DN1191_c1_g1_i4	663	0	19.86	0	1.23	0	0.82	7.43815	tr|A0A0K9QKB6|A0A0K9QKB6_SPIOL Uncharacterized protein OS=Spinacia oleracea OX=3562 GN=SOVF_169530 PE=4 SV=1
TRINITY_DN11949_c0_g1_i3	1227	0	19.76	0	0.56	0	0.37	7.43815	tr|A0A0K9RJF8|A0A0K9RJF8_SPIOL Uncharacterized protein OS=Spinacia oleracea OX=3562 GN=SOVF_060050 PE=3 SV=1
TRINITY_DN13300_c0_g1_i4	787	0	20	0	0.98	0	0.65	7.43815	tr|A0A2I7ZAR1|A0A2I7ZAR1_SESPO Mitochondrial Rho GTPase OS=Sesuvium portulacastrum OX=221166 PE=2 SV=1
TRINITY_DN13700_c2_g1_i14	4512	0	20.15	0	0.14	0	0.09	7.43815	tr|A0A0K9RU99|A0A0K9RU99_SPIOL Uncharacterized protein OS=Spinacia oleracea OX=3562 GN=SOVF_034270 PE=4 SV=1
TRINITY_DN13735_c0_g3_i1	675	0	20.06	0	1.21	0	0.8	7.43815	-
TRINITY_DN1541_c0_g1_i4	2422	0	19.88	0	0.26	0	0.17	7.43815	tr|A0A0K9QTA1|A0A0K9QTA1_SPIOL Uncharacterized protein OS=Spinacia oleracea OX=3562 GN=SOVF_144150 PE=4 SV=1
TRINITY_DN16130_c0_g2_i1	281	0	20	0	5.78	0	3.85	7.43815	-
TRINITY_DN16371_c0_g1_i6	2408	0	19.74	0	0.26	0	0.17	7.43815	tr|A0A0K9QQN4|A0A0K9QQN4_SPIOL Uncharacterized protein OS=Spinacia oleracea OX=3562 GN=SOVF_152450 PE=4 SV=1
TRINITY_DN1655_c0_g1_i5	1780	0	19.7	0	0.36	0	0.24	7.43815	tr|A0A0K9S365|A0A0K9S365_SPIOL Uncharacterized protein OS=Spinacia oleracea OX=3562 GN=SOVF_005670 PE=4 SV=1
TRINITY_DN17914_c0_g1_i5	972	0	19.89	0	0.75	0	0.5	7.43815	tr|A0A1B3TNV1|A0A1B3TNV1_MIRJA Reverse transcriptase OS=Mirabilis jalapa OX=3538 PE=4 SV=1
TRINITY_DN190_c0_g1_i13	4197	0	19.64	0	0.14	0	0.1	7.43815	tr|A0A0K9REJ8|A0A0K9REJ8_SPIOL Uncharacterized protein (Fragment) OS=Spinacia oleracea OX=3562 GN=SOVF_080420 PE=3 SV=1
TRINITY_DN19644_c0_g1_i1	897	0	20	0	0.83	0	0.55	7.43815	tr|A0A0K9RG46|A0A0K9RG46_SPIOL Uncharacterized protein OS=Spinacia oleracea OX=3562 GN=SOVF_070500 PE=4 SV=1
TRINITY_DN21149_c0_g1_i5	608	0	19.95	0	1.39	0	0.93	7.43815	-
TRINITY_DN2144_c3_g1_i5	1595	0	20.29	0	0.43	0	0.28	7.43815	tr|A0A0K9QEW5|A0A0K9QEW5_SPIOL Uncharacterized protein OS=Spinacia oleracea OX=3562 GN=SOVF_186820 PE=4 SV=1
TRINITY_DN2477_c0_g1_i4	1952	0	19.73	0	0.33	0	0.22	7.43815	tr|A0A0K9QA09|A0A0K9QA09_SPIOL Uncharacterized protein OS=Spinacia oleracea OX=3562 GN=SOVF_208110 PE=4 SV=1
TRINITY_DN2503_c0_g1_i1	2643	0	19.65	0	0.24	0	0.16	7.43815	tr|A0A0J8BM51|A0A0J8BM51_BETVU Uncharacterized protein OS=Beta vulgaris subsp. vulgaris OX=3555 GN=BVRB_9g206100 PE=4 SV=1
TRINITY_DN2607_c0_g1_i5	2549	0	20.07	0	0.25	0	0.17	7.43815	tr|A0A0K9Q9T2|A0A0K9Q9T2_SPIOL Uncharacterized protein OS=Spinacia oleracea OX=3562 GN=SOVF_203640 PE=4 SV=1
TRINITY_DN26499_c0_g1_i1	2209	0	20	0	0.29	0	0.19	7.43815	-
TRINITY_DN3020_c0_g1_i13	2654	0	20.3	0	0.24	0	0.16	7.43815	tr|A0A0K9RBX9|A0A0K9RBX9_SPIOL Uncharacterized protein OS=Spinacia oleracea OX=3562 GN=SOVF_088380 PE=4 SV=1
TRINITY_DN3161_c0_g1_i1	3832	0	20.43	0	0.17	0	0.11	7.43815	tr|A0A0K9Q8K1|A0A0K9Q8K1_SPIOL FRIGIDA-like protein OS=Spinacia oleracea OX=3562 GN=SOVF_207750 PE=3 SV=1
TRINITY_DN3176_c0_g1_i8	2197	0	19.97	0	0.29	0	0.2	7.43815	tr|A0A0K9RZE7|A0A0K9RZE7_SPIOL Uncharacterized protein OS=Spinacia oleracea OX=3562 GN=SOVF_011520 PE=3 SV=1
TRINITY_DN3557_c0_g2_i5	3697	0	19.57	0	0.16	0	0.11	7.43815	tr|A0A0J8B9Q9|A0A0J8B9Q9_BETVU Uncharacterized protein OS=Beta vulgaris subsp. vulgaris OX=3555 GN=BVRB_4g096510 PE=4 SV=1
TRINITY_DN3760_c1_g1_i6	552	0	19.76	0	1.59	0	1.06	7.43815	tr|A0A0K9RSS8|A0A0K9RSS8_SPIOL Transmembrane 9 superfamily member OS=Spinacia oleracea OX=3562 GN=SOVF_033460 PE=3 SV=1
TRINITY_DN3790_c0_g1_i2	2720	0	19.92	0	0.23	0	0.15	7.43815	tr|A0A0K9QAN5|A0A0K9QAN5_SPIOL Uncharacterized protein OS=Spinacia oleracea OX=3562 GN=SOVF_200720 PE=4 SV=1
TRINITY_DN3851_c1_g5_i1	612	0	20	0	1.38	0	0.92	7.43815	-
TRINITY_DN3882_c0_g4_i1	1489	0	20.35	0	0.46	0	0.31	7.43815	tr|A0A0K9RZA1|A0A0K9RZA1_SPIOL Uncharacterized protein OS=Spinacia oleracea OX=3562 GN=SOVF_011930 PE=4 SV=1
TRINITY_DN41_c0_g1_i11	566	0	20.09	0	1.56	0	1.04	7.43815	tr|A0A0K9S1I8|A0A0K9S1I8_SPIOL Uncharacterized protein OS=Spinacia oleracea OX=3562 GN=SOVF_010430 PE=4 SV=1
TRINITY_DN4764_c0_g1_i12	1865	0	20.08	0	0.35	0	0.23	7.43815	tr|A0A0K9R3D2|A0A0K9R3D2_SPIOL Uncharacterized protein (Fragment) OS=Spinacia oleracea OX=3562 GN=SOVF_109630 PE=3 SV=1
TRINITY_DN4839_c0_g1_i14	3678	0	20.49	0	0.17	0	0.12	7.43815	tr|A0A0K9R955|A0A0K9R955_SPIOL Uncharacterized protein OS=Spinacia oleracea OX=3562 GN=SOVF_099590 PE=4 SV=1
TRINITY_DN4954_c0_g1_i1	932	0	19.51	0	0.77	0	0.51	7.43815	tr|A0A0J8B6C4|A0A0J8B6C4_BETVU Uncharacterized protein OS=Beta vulgaris subsp. vulgaris OX=3555 GN=BVRB_8g199960 PE=4 SV=1
TRINITY_DN5117_c0_g2_i2	1206	0	19.61	0	0.57	0	0.38	7.43815	tr|A0A0K9QDS3|A0A0K9QDS3_SPIOL Uncharacterized protein (Fragment) OS=Spinacia oleracea OX=3562 GN=SOVF_190600 PE=4 SV=1
TRINITY_DN5138_c0_g1_i1	673	0	20.13	0	1.22	0	0.81	7.43815	tr|F4MLC7|F4MLC7_BETVM Uncharacterized protein OS=Beta vulgaris subsp. maritima OX=350892 GN=orf266 PE=4 SV=1
TRINITY_DN5153_c0_g1_i4	1664	0	20.07	0	0.4	0	0.27	7.43815	-
TRINITY_DN5228_c0_g1_i2	2973	0	20.02	0	0.21	0	0.14	7.43815	tr|A0A0K9QQU5|A0A0K9QQU5_SPIOL Uncharacterized protein OS=Spinacia oleracea OX=3562 GN=SOVF_158260 PE=4 SV=1
TRINITY_DN53852_c0_g1_i1	1065	0	20	0	0.67	0	0.45	7.43815	-
TRINITY_DN5411_c0_g1_i6	1186	0	19.74	0	0.58	0	0.39	7.43815	tr|A0A0K9RDX4|A0A0K9RDX4_SPIOL Uncharacterized protein OS=Spinacia oleracea OX=3562 GN=SOVF_077680 PE=4 SV=1
TRINITY_DN5506_c0_g1_i2	3101	0	20.28	0	0.21	0	0.14	7.43815	tr|A0A0K9R1V9|A0A0K9R1V9_SPIOL Uncharacterized protein OS=Spinacia oleracea OX=3562 GN=SOVF_122840 PE=4 SV=1
TRINITY_DN5622_c0_g1_i5	957	0	20.09	0	0.77	0	0.51	7.43815	tr|A0A0K9QB16|A0A0K9QB16_SPIOL Uncharacterized protein (Fragment) OS=Spinacia oleracea OX=3562 GN=SOVF_206410 PE=4 SV=1
TRINITY_DN5867_c0_g1_i4	2126	0	19.75	0	0.3	0	0.2	7.43815	tr|A0A0K9QAQ8|A0A0K9QAQ8_SPIOL Protein DETOXIFICATION OS=Spinacia oleracea OX=3562 GN=SOVF_199740 PE=3 SV=1
TRINITY_DN6251_c0_g1_i2	2497	0	20.09	0	0.26	0	0.17	7.43815	tr|A0A0K9RFN9|A0A0K9RFN9_SPIOL Uncharacterized protein OS=Spinacia oleracea OX=3562 GN=SOVF_078380 PE=4 SV=1
TRINITY_DN633_c0_g1_i3	1542	0	20.38	0	0.44	0	0.3	7.43815	tr|A0A0K9QVG3|A0A0K9QVG3_SPIOL Uncharacterized protein OS=Spinacia oleracea OX=3562 GN=SOVF_143900 PE=4 SV=1
TRINITY_DN6584_c0_g1_i1	2989	0	20.21	0	0.21	0	0.14	7.43815	tr|A0A0K9QHD4|A0A0K9QHD4_SPIOL Uncharacterized protein OS=Spinacia oleracea OX=3562 GN=SOVF_179100 PE=4 SV=1
TRINITY_DN6865_c0_g2_i10	2028	0	20.09	0	0.32	0	0.21	7.43815	tr|A0A0K9RN93|A0A0K9RN93_SPIOL Uncharacterized protein OS=Spinacia oleracea OX=3562 GN=SOVF_053570 PE=4 SV=1
TRINITY_DN705_c1_g1_i6	1796	0	20.12	0	0.37	0	0.25	7.43815	tr|A0A0K9QWL4|A0A0K9QWL4_SPIOL Uncharacterized protein OS=Spinacia oleracea OX=3562 GN=SOVF_133390 PE=4 SV=1
TRINITY_DN708_c0_g1_i10	3664	0	20.02	0	0.17	0	0.11	7.43815	tr|A0A0K9R9A5|A0A0K9R9A5_SPIOL Uncharacterized protein OS=Spinacia oleracea OX=3562 GN=SOVF_099070 PE=4 SV=1
TRINITY_DN7114_c0_g2_i6	4915	0	20.11	0	0.13	0	0.08	7.43815	tr|A0A0K9RLV8|A0A0K9RLV8_SPIOL Uncharacterized protein OS=Spinacia oleracea OX=3562 GN=SOVF_051900 PE=4 SV=1
TRINITY_DN7208_c0_g1_i5	243	0	20.09	0	8.6	0	5.72	7.43815	tr|E7BQD4|E7BQD4_SILLA Gag-pol polyprotein OS=Silene latifolia OX=37657 PE=4 SV=1
TRINITY_DN7618_c0_g1_i10	735	0	20.46	0	1.1	0	0.73	7.43815	tr|A0A1B3TNU5|A0A1B3TNU5_MIRJA RNaseH OS=Mirabilis jalapa OX=3538 PE=4 SV=1
TRINITY_DN773_c0_g1_i12	992	0	19.8	0	0.72	0	0.48	7.43815	tr|A0A0K9QCM6|A0A0K9QCM6_SPIOL Uncharacterized protein OS=Spinacia oleracea OX=3562 GN=SOVF_194110 PE=4 SV=1
TRINITY_DN7976_c0_g3_i1	894	0	20	0	0.83	0	0.55	7.43815	tr|A0A0K9S185|A0A0K9S185_SPIOL Uncharacterized protein OS=Spinacia oleracea OX=3562 GN=SOVF_005960 PE=3 SV=1
TRINITY_DN8600_c0_g1_i3	588	0	20.31	0	1.49	0	0.99	7.43815	tr|A0A0K9RTX8|A0A0K9RTX8_SPIOL Uncharacterized protein OS=Spinacia oleracea OX=3562 GN=SOVF_029930 PE=4 SV=1
TRINITY_DN8763_c3_g1_i6	780	0	19.87	0	0.99	0	0.66	7.43815	tr|G9FIF2|G9FIF2_BETVU Uncharacterized protein OS=Beta vulgaris OX=161934 PE=4 SV=1
TRINITY_DN8933_c0_g1_i2	725	0	20	0	1.09	0	0.73	7.43815	tr|A0A0K9QZ91|A0A0K9QZ91_SPIOL Uncharacterized protein OS=Spinacia oleracea OX=3562 GN=SOVF_124700 PE=4 SV=1
TRINITY_DN9242_c0_g1_i5	2180	0	20.14	0	0.3	0	0.2	7.43815	tr|A0A0K9QI81|A0A0K9QI81_SPIOL F-actin-capping protein subunit beta OS=Spinacia oleracea OX=3562 GN=SOVF_176390 PE=3 SV=1
TRINITY_DN9255_c0_g1_i1	465	0	20	0	2.1	0	1.4	7.43815	tr|A0A0K9QYQ2|A0A0K9QYQ2_SPIOL Uncharacterized protein OS=Spinacia oleracea OX=3562 GN=SOVF_126330 PE=4 SV=1
TRINITY_DN9538_c0_g1_i3	237	0	20	0	9.23	0	6.14	7.43815	-
TRINITY_DN993_c0_g1_i5	422	0	20.26	0	2.51	0	1.67	7.43815	tr|A0A0K9QY13|A0A0K9QY13_SPIOL Uncharacterized protein OS=Spinacia oleracea OX=3562 GN=SOVF_128410 PE=4 SV=1
TRINITY_DN10336_c0_g1_i2	305	0	19.32	0	4.59	0	3.05	7.36459	-
TRINITY_DN10375_c0_g2_i4	1217	0	19.08	0	0.55	0	0.36	7.36459	tr|A0A0K9RHE5|A0A0K9RHE5_SPIOL Uncharacterized protein OS=Spinacia oleracea OX=3562 GN=SOVF_071400 PE=4 SV=1
TRINITY_DN10415_c2_g3_i9	1419	0	19.18	0	0.46	0	0.31	7.36459	tr|A0A0K9S311|A0A0K9S311_SPIOL Reticulon-like protein OS=Spinacia oleracea OX=3562 GN=SOVF_005310 PE=4 SV=1
TRINITY_DN10484_c0_g1_i7	971	0	19.42	0	0.73	0	0.49	7.36459	-
TRINITY_DN10554_c0_g1_i11	1632	0	19.1	0	0.39	0	0.26	7.36459	tr|A0A0K9Q9S4|A0A0K9Q9S4_SPIOL Uncharacterized protein OS=Spinacia oleracea OX=3562 GN=SOVF_203410 PE=4 SV=1
TRINITY_DN10569_c0_g1_i4	862	0	18.75	0	0.82	0	0.54	7.36459	tr|A0A0J8B2D3|A0A0J8B2D3_BETVU Uncharacterized protein OS=Beta vulgaris subsp. vulgaris OX=3555 GN=BVRB_009840 PE=4 SV=1
TRINITY_DN10799_c0_g1_i7	292	0	19	0	5	0	3.33	7.36459	tr|A0A0J8B1V4|A0A0J8B1V4_BETVU Uncharacterized protein OS=Beta vulgaris subsp. vulgaris OX=3555 GN=BVRB_013360 PE=3 SV=1
TRINITY_DN10814_c0_g1_i2	3459	0	19.4	0	0.18	0	0.12	7.36459	tr|A0A0K9RM53|A0A0K9RM53_SPIOL Uncharacterized protein OS=Spinacia oleracea OX=3562 GN=SOVF_057040 PE=4 SV=1
TRINITY_DN11123_c0_g1_i2	2145	0	19.26	0	0.29	0	0.19	7.36459	tr|A0A0K9RCS6|A0A0K9RCS6_SPIOL O-acyltransferase OS=Spinacia oleracea OX=3562 GN=SOVF_081600 PE=3 SV=1
TRINITY_DN1112_c0_g1_i7	2170	0	18.91	0	0.28	0	0.19	7.36459	tr|A0A0J8B700|A0A0J8B700_BETVU Uncharacterized protein OS=Beta vulgaris subsp. vulgaris OX=3555 GN=BVRB_005400 PE=3 SV=1
TRINITY_DN11517_c0_g1_i1	1712	0	19.05	0	0.37	0	0.25	7.36459	tr|A0A0K9QZG2|A0A0K9QZG2_SPIOL Poly [ADP-ribose] polymerase (Fragment) OS=Spinacia oleracea OX=3562 GN=SOVF_124230 PE=4 SV=1
TRINITY_DN11711_c0_g1_i3	1611	0	19.42	0	0.4	0	0.27	7.36459	tr|A0A0K9RY94|A0A0K9RY94_SPIOL Uncharacterized protein OS=Spinacia oleracea OX=3562 GN=SOVF_014880 PE=4 SV=1
TRINITY_DN12242_c0_g3_i2	1818	0	18.75	0	0.34	0	0.23	7.36459	tr|A0A0K9RWD3|A0A0K9RWD3_SPIOL Uncharacterized protein OS=Spinacia oleracea OX=3562 GN=SOVF_020680 PE=4 SV=1
TRINITY_DN13700_c2_g1_i12	4159	0.16	18.52	0	0.14	0	0.09	7.36459	tr|A0A0K9RU99|A0A0K9RU99_SPIOL Uncharacterized protein OS=Spinacia oleracea OX=3562 GN=SOVF_034270 PE=4 SV=1
TRINITY_DN14386_c0_g1_i25	3122	0	18.82	0	0.19	0	0.13	7.36459	tr|A0A0K9RW03|A0A0K9RW03_SPIOL Terpene cyclase/mutase family member OS=Spinacia oleracea OX=3562 GN=SOVF_022560 PE=3 SV=1
TRINITY_DN145_c0_g3_i4	2481	0	19.27	0	0.25	0	0.17	7.36459	tr|A0A0K9RF90|A0A0K9RF90_SPIOL Uncharacterized protein OS=Spinacia oleracea OX=3562 GN=SOVF_078460 PE=4 SV=1
TRINITY_DN1481_c1_g1_i1	2526	0	18.89	0	0.24	0	0.16	7.36459	tr|A0A0K9R8Z0|A0A0K9R8Z0_SPIOL Uncharacterized protein OS=Spinacia oleracea OX=3562 GN=SOVF_093010 PE=4 SV=1
TRINITY_DN1481_c1_g1_i14	3268	0	19.48	0	0.19	0	0.12	7.36459	tr|A0A0K9R8Z0|A0A0K9R8Z0_SPIOL Uncharacterized protein OS=Spinacia oleracea OX=3562 GN=SOVF_093010 PE=4 SV=1
TRINITY_DN15446_c0_g1_i1	409	0	19	0	2.49	0	1.66	7.36459	-
TRINITY_DN15797_c0_g1_i2	786	0	18.79	0	0.92	0	0.61	7.36459	tr|A0A0K9R1B2|A0A0K9R1B2_SPIOL Uncharacterized protein OS=Spinacia oleracea OX=3562 GN=SOVF_117950 PE=4 SV=1
TRINITY_DN17135_c0_g1_i7	2257	0	19.28	0	0.27	0	0.18	7.36459	-
TRINITY_DN19015_c0_g1_i2	518	0	19	0	1.68	0	1.12	7.36459	-
TRINITY_DN1917_c0_g1_i5	2709	0	18.96	0	0.22	0	0.15	7.36459	tr|A0A0K9S0F0|A0A0K9S0F0_SPIOL Uncharacterized protein OS=Spinacia oleracea OX=3562 GN=SOVF_008370 PE=4 SV=1
TRINITY_DN2069_c0_g1_i7	1873	0	19.3	0	0.34	0	0.22	7.36459	tr|A0A0K9RXS6|A0A0K9RXS6_SPIOL Molybdopterin synthase catalytic subunit OS=Spinacia oleracea OX=3562 GN=SOVF_016450 PE=3 SV=1
TRINITY_DN21053_c0_g1_i1	1307	0	19	0	0.5	0	0.33	7.36459	-
TRINITY_DN2115_c0_g1_i2	967	0	19.22	0	0.73	0	0.48	7.36459	tr|A0A0K9RWX4|A0A0K9RWX4_SPIOL Uncharacterized protein OS=Spinacia oleracea OX=3562 GN=SOVF_019800 PE=4 SV=1
TRINITY_DN2143_c1_g1_i15	909	0	19.03	0	0.78	0	0.52	7.36459	-
TRINITY_DN2149_c0_g1_i30	2951	0	19.18	0	0.2	0	0.14	7.36459	tr|A0A0K9RFE8|A0A0K9RFE8_SPIOL Uncharacterized protein OS=Spinacia oleracea OX=3562 GN=SOVF_073040 PE=4 SV=1
TRINITY_DN2150_c0_g1_i9	1254	0	18.94	0	0.52	0	0.35	7.36459	tr|A0A0K9QGM1|A0A0K9QGM1_SPIOL Uncharacterized protein OS=Spinacia oleracea OX=3562 GN=SOVF_181630 PE=4 SV=1
TRINITY_DN22300_c0_g1_i2	479	0	18.94	0	1.9	0	1.26	7.36459	-
TRINITY_DN2576_c1_g1_i2	611	0	18.52	0	1.28	0	0.85	7.36459	-
TRINITY_DN2612_c0_g2_i12	860	0	18.61	0	0.81	0	0.54	7.36459	tr|A0A0K9R373|A0A0K9R373_SPIOL Uncharacterized protein (Fragment) OS=Spinacia oleracea OX=3562 GN=SOVF_111810 PE=4 SV=1
TRINITY_DN26964_c0_g1_i2	2606	0	19.34	0	0.24	0	0.16	7.36459	tr|A0A0K9RGG0|A0A0K9RGG0_SPIOL Uncharacterized protein OS=Spinacia oleracea OX=3562 GN=SOVF_073990 PE=4 SV=1
TRINITY_DN2714_c0_g1_i13	1072	0	19.28	0	0.64	0	0.43	7.36459	tr|A0A0K9QFU6|A0A0K9QFU6_SPIOL Proliferating cell nuclear antigen OS=Spinacia oleracea OX=3562 GN=SOVF_184080 PE=3 SV=1
TRINITY_DN2980_c0_g1_i4	575	0	19.4	0	1.47	0	0.98	7.36459	-
TRINITY_DN30295_c0_g1_i2	1672	0	18.97	0	0.38	0	0.25	7.36459	tr|A0A0K9QLT1|A0A0K9QLT1_SPIOL Uncharacterized protein (Fragment) OS=Spinacia oleracea OX=3562 GN=SOVF_170060 PE=4 SV=1
TRINITY_DN3455_c0_g1_i1	1810	0	19.48	0	0.35	0	0.24	7.36459	tr|A0A0K9S3U4|A0A0K9S3U4_SPIOL Vacuolar cation/proton exchanger OS=Spinacia oleracea OX=3562 GN=SOVF_002360 PE=3 SV=1
TRINITY_DN3528_c2_g1_i20	854	0	19.07	0	0.84	0	0.56	7.36459	tr|A0A0K9QFP4|A0A0K9QFP4_SPIOL Uncharacterized protein (Fragment) OS=Spinacia oleracea OX=3562 GN=SOVF_184330 PE=4 SV=1
TRINITY_DN3715_c0_g1_i5	2205	0	18.75	0	0.27	0	0.18	7.36459	tr|A0A0K9QTI0|A0A0K9QTI0_SPIOL Uncharacterized protein OS=Spinacia oleracea OX=3562 GN=SOVF_143120 PE=4 SV=1
TRINITY_DN3717_c0_g1_i1	573	0	18.61	0	1.41	0	0.94	7.36459	-
TRINITY_DN3759_c0_g1_i5	2218	0.12	19.14	0	0.28	0	0.19	7.36459	tr|A0A0K9RU98|A0A0K9RU98_SPIOL Uncharacterized protein OS=Spinacia oleracea OX=3562 GN=SOVF_033640 PE=4 SV=1
TRINITY_DN4153_c1_g2_i1	396	0	19.41	0	2.7	0	1.8	7.36459	-
TRINITY_DN4399_c0_g1_i3	1755	0	18.83	0	0.35	0	0.24	7.36459	tr|A0A0K9QIN2|A0A0K9QIN2_SPIOL Uncharacterized protein (Fragment) OS=Spinacia oleracea OX=3562 GN=SOVF_179810 PE=4 SV=1
TRINITY_DN4411_c0_g1_i1	2328	0	19.43	0	0.27	0	0.18	7.36459	tr|A0A0K9RZL6|A0A0K9RZL6_SPIOL Uncharacterized protein OS=Spinacia oleracea OX=3562 GN=SOVF_011020 PE=4 SV=1
TRINITY_DN4479_c0_g1_i5	3144	0	19.24	0	0.19	0	0.13	7.36459	tr|A0A0K9RDR1|A0A0K9RDR1_SPIOL Uncharacterized protein OS=Spinacia oleracea OX=3562 GN=SOVF_078230 PE=4 SV=1
TRINITY_DN449_c1_g2_i3	846	0	18.83	0	0.84	0	0.56	7.36459	tr|A0A0K9QVJ2|A0A0K9QVJ2_SPIOL Uncharacterized protein OS=Spinacia oleracea OX=3562 GN=SOVF_143470 PE=4 SV=1
TRINITY_DN4518_c0_g1_i4	1574	0	19.02	0	0.4	0	0.27	7.36459	tr|A0A0K9RJN3|A0A0K9RJN3_SPIOL Uncharacterized protein OS=Spinacia oleracea OX=3562 GN=SOVF_059260 PE=4 SV=1
TRINITY_DN5026_c0_g1_i9	3397	0	18.79	0	0.17	0	0.12	7.36459	tr|A0A0K9R329|A0A0K9R329_SPIOL Uncharacterized protein OS=Spinacia oleracea OX=3562 GN=SOVF_117820 PE=4 SV=1
TRINITY_DN5091_c0_g1_i4	3717	0	18.7	0	0.16	0	0.1	7.36459	tr|A0A0K9RGY6|A0A0K9RGY6_SPIOL Uncharacterized protein OS=Spinacia oleracea OX=3562 GN=SOVF_067650 PE=3 SV=1
TRINITY_DN5797_c0_g1_i23	1427	0	19.43	0	0.46	0	0.31	7.36459	tr|A0A0K9QWW4|A0A0K9QWW4_SPIOL Uncharacterized protein (Fragment) OS=Spinacia oleracea OX=3562 GN=SOVF_132090 PE=4 SV=1
TRINITY_DN5807_c0_g2_i3	1842	0	19.04	0	0.34	0	0.23	7.36459	tr|A0A0K9RPB8|A0A0K9RPB8_SPIOL Uncharacterized protein OS=Spinacia oleracea OX=3562 GN=SOVF_043680 PE=4 SV=1
TRINITY_DN6012_c1_g1_i6	1751	0	19.01	0	0.36	0	0.24	7.36459	tr|A0A0K9R951|A0A0K9R951_SPIOL Uncharacterized protein OS=Spinacia oleracea OX=3562 GN=SOVF_099540 PE=4 SV=1
TRINITY_DN67_c1_g1_i5	3057	0.07	18.52	0	0.19	0	0.13	7.36459	tr|A0A0K9RMA7|A0A0K9RMA7_SPIOL Beta-amylase OS=Spinacia oleracea OX=3562 GN=SOVF_055720 PE=3 SV=1
TRINITY_DN7041_c1_g1_i3	2503	0	18.98	0	0.24	0	0.16	7.36459	tr|A0A0K9QL66|A0A0K9QL66_SPIOL Uncharacterized protein OS=Spinacia oleracea OX=3562 GN=SOVF_166760 PE=4 SV=1
TRINITY_DN7060_c0_g2_i2	1759	0	18.61	0	0.35	0	0.23	7.36459	tr|A0A0K9QWN4|A0A0K9QWN4_SPIOL Uncharacterized protein OS=Spinacia oleracea OX=3562 GN=SOVF_138230 PE=4 SV=1
TRINITY_DN7214_c1_g1_i1	445	0	19	0	2.15	0	1.43	7.36459	-
TRINITY_DN7225_c0_g2_i2	1464	0	18.51	0	0.43	0	0.28	7.36459	tr|P93551|P93551_SPIOL Peroxidase (Fragment) OS=Spinacia oleracea OX=3562 GN=prxr7 PE=2 SV=1
TRINITY_DN7760_c0_g1_i2	5894	0	18.89	0	0.1	0	0.07	7.36459	tr|A0A0K9QR06|A0A0K9QR06_SPIOL Uncharacterized protein OS=Spinacia oleracea OX=3562 GN=SOVF_151060 PE=4 SV=1
TRINITY_DN7760_c0_g1_i6	6044	0	19.08	0	0.1	0	0.06	7.36459	tr|A0A0K9QR06|A0A0K9QR06_SPIOL Uncharacterized protein OS=Spinacia oleracea OX=3562 GN=SOVF_151060 PE=4 SV=1
TRINITY_DN7839_c0_g1_i1	713	0	18.61	0	1.04	0	0.69	7.36459	tr|A0A0K9RIU4|A0A0K9RIU4_SPIOL Uncharacterized protein OS=Spinacia oleracea OX=3562 GN=SOVF_066550 PE=3 SV=1
TRINITY_DN7992_c0_g1_i1	3205	0	18.76	0	0.18	0	0.12	7.36459	tr|A0A0J8DVG8|A0A0J8DVG8_BETVU Uncharacterized protein OS=Beta vulgaris subsp. vulgaris OX=3555 GN=BVRB_014760 PE=4 SV=1
TRINITY_DN866_c0_g3_i1	2435	0	18.6	0	0.24	0	0.16	7.36459	tr|A0A0K9QVP8|A0A0K9QVP8_SPIOL Uncharacterized protein OS=Spinacia oleracea OX=3562 GN=SOVF_141140 PE=4 SV=1
TRINITY_DN8770_c0_g1_i6	1411	0	18.84	0	0.45	0	0.3	7.36459	-
TRINITY_DN881_c7_g4_i1	212	0	19	0	12.61	0	8.39	7.36459	-
TRINITY_DN893_c0_g2_i1	2159	0	19.16	0	0.29	0	0.19	7.36459	tr|A0A0K9S293|A0A0K9S293_SPIOL Uncharacterized protein OS=Spinacia oleracea OX=3562 GN=SOVF_001770 PE=4 SV=1
TRINITY_DN9549_c0_g1_i4	1689	0	18.6	0	0.37	0	0.24	7.36459	tr|A0A0K9QEZ5|A0A0K9QEZ5_SPIOL Uncharacterized protein OS=Spinacia oleracea OX=3562 GN=SOVF_186610 PE=4 SV=1
[truncated: 1,822 more rows]
