# Supplementary material for: Elucidation of the core betalain biosynthesis pathway in Amaranthus tricolor
Source: Sci Rep. 2021 Mar 17;11:6086. doi: 10.1038/s41598-021-85486-x (PMC7969944; doi:10.1038/s41598-021-85486-x)
Supplement: Supplementary file 5 — Supplementary Information 5. [file 41598_2021_85486_MOESM5_ESM.xlsx]

## Sheet: 工作表1
Supplementary Table S4. Genes involved in the synthesis of betalain pigments in A. tricolor identified through comparative transcriptome analysis.
Gene name (transcript_id)	TPM (AMG)	TPM (AMR)	logFC (AMG-AMR)	FDR (AMG-AMR)
AmCYP76AD1
(TRINITY_DN6662_c0_g1_i2)	0.11	81.89	9.65039	7.63226e-19
AmDODAα1 (AmDODA)
(TRINITY_DN8916_c0_g2_i1)	42.61	69.58	0.866349	1
AmDODAα2
(TRINITY_DN12514_c0_g1_i1)	13.26	8.39	-0.501463	1
(TRINITY_DN12514_c0_g1_i2)	14.08	17.45	0.467604	1
AmcDOPA5GT
(TRINITY_DN8176_c0_g2_i1)	9.51	7.21	-0.241105	1
AmB5GT
(TRINITY_DN15965_c1_g1_i1)	2.98	3.28	0.297984	1
AhUGT79B30-like4
(TRINITY_DN264_c0_g1_i3)	21.33	20.66	0.112809	1
AmTyDC
(TRINITY_DN8169_c0_g2_i1)	5.1	7.62	0.739155	1
AmADH
(TRINITY_DN5352_c0_g2_i1)	3.42	3.12	0.0271204	1
